# Supplementary material for: A one-pot stepwise approach to axially chiral quinoline-3-carbaldehydes enabled by iminium–allenamine cascade catalysis
Source: Royal Society of Chemistry journal article supplement (doi:10.1039/d0qo01339k), 2020-12-09
Supplement: d0qo01339k1.pdf [file d0qo01339k1.pdf]

# Supporting Information

## One-Pot Stepwise Approach to Axially Chiral Quinoline-3-Carbaldehydes Enabled by Iminium-Allenamine Cascade Catalysis

You-Dong Shao,<sup>b</sup> Dan-Dan Han,<sup>b</sup> Meng-Meng Dong,<sup>b</sup> Xin-Ru Yang<sup>b</sup> and Dao-Juan Cheng<sup>a,b,\*</sup>

<sup>a</sup> School of Pharmacy, Anhui University of Chinese Medicine, Hefei 230012, China

<sup>b</sup> School of Chemistry and Chemical Engineering, Heze University, Heze 274015, China

E-mail: chengdaojuan0614@163.com

### Table of Contents

|                                                                                         |      |
|-----------------------------------------------------------------------------------------|------|
| General Information.....                                                                | S2   |
| Preparation and Analytic Data of 2-(Tosylamino)aryl Ketones <b>1</b> .....              | S2   |
| General Procedure for the Atroposelective Aza-Michael-aldol-aromatization Sequence..... | S11  |
| Procedure for the Scale-up Experiment .....                                             | S11  |
| Procedure for the Stepwise Synthesis .....                                              | S12  |
| Procedure for the Transformations of Products <b>3</b> .....                            | S13  |
| Analytic Data for the Products.....                                                     | S15  |
| Investigation on the Racemization Barrier of <b>3aa</b> .....                           | S33  |
| References.....                                                                         | S35  |
| NMR Spectra of 2-Aminoaryl Ketones <b>1</b> .....                                       | S36  |
| NMR Spectra of Products .....                                                           | S59  |
| HPLC Traces.....                                                                        | S101 |
| X-ray Crystallographic Information.....                                                 | S138 |

## General Information

$^1\text{H}$  and  $^{13}\text{C}$  NMR spectra were recorded on a Bruker AC-400 FT (400 MHz for  $^1\text{H}$  NMR and 100 MHz for  $^{13}\text{C}$  NMR, respectively) using tetramethylsilane as an internal reference. Chemical shifts ( $\delta$ ) and coupling constants ( $J$ ) were expressed in ppm and Hz, respectively. High resolution mass spectra (HRMS) were recorded on a LC-TOF spectrometer (Micromass). ESI-HRMS data were acquired using a Thermo LTQ Orbitrap XL Instrument equipped with an ESI source and controlled by Xcalibur software. High pressure liquid chromatography (HPLC) analyses were performed on a Thermo Scientific UltiMate 3000 instrument equipped with an isostatic pump, using a chiral stationary phase column (Daicel Co. CHIRALPAK). The chiral HPLC methods were calibrated with the corresponding racemic mixtures. Optical Rotation was measured on an Anton Paar MCP 100/150 polarimeter. X-ray crystallography analysis of single crystal was performed on a SuperNova, Dual, Cu at zero, Eos diffractometer.

Chloroform was distilled over calcium hydride. Other solvents and chemicals were purchased from the Sinopharm Chemical Reagent Co., Adamas, Acros, Alfa Aesar, and TCI, and used as received. 2-Alkynals **2** were prepared according to the literature.<sup>1</sup> Catalysts **C1-6** and **C8-9** were purchased from Daicel Chiral Technologies (China) CO., LTD. and used directly.

## Preparation and Analytic Data of 2-(Tosylamino)aryl Ketones **1**

2-(Tosylamino)aryl ketones **1** were prepared from the corresponding 2-aminoaryl ketones **S1**<sup>2</sup> and 4-toluenesulfonyl chloride **S2** via the following procedure. The new compounds were characterized in this report.

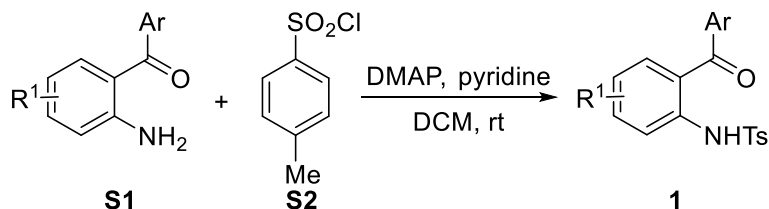

To a solution of **S1** (1.0 mmol) in dichloromethane (5.0 mL) were added pyridine (0.5 mL), DMAP (24.4 mg, 0.20 mmol) and 4-toluenesulfonyl chloride **S2** (286.0 mg, 1.5 mmol) at 0 °C successively. The mixture was then allowed to stir at room temperature for 24 h. Dilute the reaction with 50 mL of dichloromethane. The reaction mixture was washed twice with a saturated aqueous solution of CuSO<sub>4</sub> (2 × 30 mL) and once with brine (30 mL). The organic

layer was dried with anhydrous Na<sub>2</sub>SO<sub>4</sub> and concentrated in vacuo. The crude product was then purified by chromatography on silica gel (petroleum ether/ethyl acetate) to give **1**.

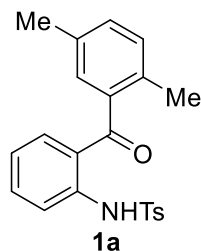

*N*-(2-(2,5-Dimethylbenzoyl)phenyl)-4-methylbenzenesulfonamide **1a** was obtained as a white solid in 90% yield. *R*<sub>f</sub> = 0.40 (petroleum ether/ethyl acetate = 5:1); m.p. 106-107 °C; <sup>1</sup>H NMR (400 MHz, CDCl<sub>3</sub>): δ 11.06 (br., s, 1H), 7.80 (d, *J* = 8.4 Hz, 1H), 7.72 (d, *J* = 8.0 Hz, 2H), 7.52-7.44 (m, 1H), 7.30-7.24 (m, 1H), 7.23-7.15 (m, 3H), 7.11 (d, *J* = 8.0 Hz, 1H), 6.98 (t, *J* = 7.6 Hz, 1H), 6.71 (s, 1H), 2.35 (s, 3H), 2.29 (s, 3H), 2.04 (s, 3H); <sup>13</sup>C NMR (100 MHz, CDCl<sub>3</sub>): δ 202.4, 143.8, 140.2, 138.5, 136.6, 134.9, 134.8, 134.5, 132.8, 131.2, 130.8, 129.7, 128.3, 127.3, 124.3, 123.0, 120.7, 21.5, 20.9, 19.0; HRMS (ESI) calcd for C<sub>22</sub>H<sub>22</sub>NO<sub>3</sub>S (M+H)<sup>+</sup> 380.1315, found 380.1316.

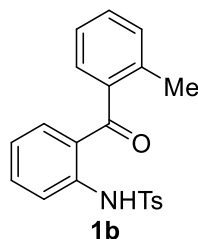

4-Methyl-*N*-(2-(2-methylbenzoyl)phenyl)benzenesulfonamide **1b** was obtained as a white solid in 92% yield. *R*<sub>f</sub> = 0.40 (petroleum ether/ethyl acetate = 5:1); m.p. 99-100 °C; <sup>1</sup>H NMR (400 MHz, CDCl<sub>3</sub>): δ 11.03 (br., s, 1H), 7.80 (dd, *J* = 8.4, 1.2 Hz, 1H), 7.72 (d, *J* = 8.4 Hz, 2H), 7.53-7.45 (m, 1H), 7.40-7.33 (m, 1H), 7.28-7.14 (m, 5H), 7.02-6.94 (m, 1H), 6.88 (dd, *J* = 7.6, 1.2 Hz, 1H), 2.36 (s, 3H), 2.12 (s, 3H); <sup>13</sup>C NMR (100 MHz, CDCl<sub>3</sub>): δ 202.1, 143.9, 140.3, 138.5, 136.5, 136.1, 134.9, 134.5, 130.9, 130.5, 129.7, 128.0, 127.3, 125.2, 124.3, 123.0, 120.7, 21.5, 19.6; HRMS (ESI) calcd for C<sub>21</sub>H<sub>18</sub>NO<sub>3</sub>S (M-H)<sup>-</sup> 364.1013, found 364.1036.

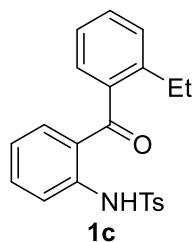

*N*-(2-(2-Ethylbenzoyl)phenyl)-4-methylbenzenesulfonamide **1c** was obtained as a yellowish

oil in 93% yield.  $R_f = 0.40$  (petroleum ether/ethyl acetate = 5:1);  $^1\text{H}$  NMR (400 MHz,  $\text{CDCl}_3$ ):  $\delta$  11.12 (br., s, 1H), 7.80 (d,  $J = 8.4$  Hz, 1H), 7.73 (d,  $J = 8.4$  Hz, 2H), 7.52-7.44 (m, 1H), 7.43-7.37 (m, 1H), 7.32-7.24 (m, 2H), 7.23-7.13 (m, 3H), 6.97 (t,  $J = 7.6$  Hz, 1H), 6.83 (d,  $J = 7.2$  Hz, 1H), 2.47 (q,  $J = 7.6$  Hz, 2H), 2.36 (s, 3H), 1.08 (t,  $J = 7.6$  Hz, 3H);  $^{13}\text{C}$  NMR (100 MHz,  $\text{CDCl}_3$ ):  $\delta$  202.3, 143.9, 142.4, 140.4, 138.2, 136.5, 134.9, 134.7, 130.5, 129.7, 129.4, 127.8, 127.3, 125.1, 124.2, 122.9, 120.5, 26.2, 21.5, 15.7; HRMS (ESI) calcd for  $\text{C}_{22}\text{H}_{20}\text{NO}_3\text{S}$  ( $\text{M}-\text{H}$ ) $^-$  378.1169, found 378.1187.

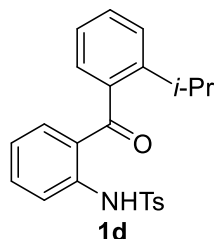

*N*-(2-(2-Isopropylbenzoyl)phenyl)-4-methylbenzenesulfonamide **1d** was obtained as a white solid in 89% yield.  $R_f = 0.40$  (petroleum ether/ethyl acetate = 8:1); m.p. 104-105 °C;  $^1\text{H}$  NMR (400 MHz,  $\text{CDCl}_3$ ):  $\delta$  11.27 (br., s, 1H), 7.80 (dd,  $J = 8.4, 1.2$  Hz, 1H), 7.76 (d,  $J = 8.4$  Hz, 2H), 7.51-7.45 (m, 1H), 7.44-7.38 (m, 2H), 7.28-7.20 (m, 3H), 7.19-7.13 (m, 1H), 6.99-6.92 (m, 1H), 6.82 (dd,  $J = 7.6, 1.2$  Hz, 1H), 2.80-2.69 (m, 1H), 2.38 (s, 3H), 1.13 (d,  $J = 6.8$  Hz, 6H);  $^{13}\text{C}$  NMR (100 MHz,  $\text{CDCl}_3$ ):  $\delta$  202.8, 146.6, 143.9, 140.6, 138.0, 136.6, 135.1, 134.9, 130.4, 129.7, 127.3, 127.0, 126.1, 125.2, 123.9, 122.7, 120.1, 30.4, 24.0, 21.6; HRMS (ESI) calcd for  $\text{C}_{23}\text{H}_{24}\text{NO}_3\text{S}$  ( $\text{M}+\text{H}$ ) $^+$  394.1471, found 394.1482.

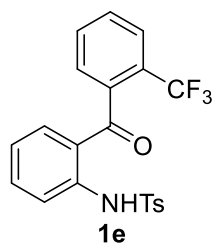

4-Methyl-*N*-(2-(2-(trifluoromethyl)benzoyl)phenyl)benzenesulfonamide **1e** was obtained as a white solid in 92% yield.  $R_f = 0.40$  (petroleum ether/ethyl acetate = 8:1); m.p. 109-110 °C;  $^1\text{H}$  NMR (400 MHz,  $\text{CDCl}_3$ ):  $\delta$  10.09 (br., s, 1H), 7.82-7.72 (m, 4H), 7.65-7.55 (m, 2H), 7.52-7.46 (m, 1H), 7.28-7.22 (m, 2H), 7.15 (dd,  $J = 8.0, 1.6$  Hz, 1H), 7.11-7.05 (m, 1H), 6.98-6.92 (m, 1H), 2.39 (s, 3H);  $^{13}\text{C}$  NMR (100 MHz,  $\text{CDCl}_3$ ):  $\delta$  199.1, 144.1, 140.9, 137.5 (q,  $J = 2.1$  Hz), 136.4, 135.6, 134.9, 131.4, 130.1, 129.7, 127.9, 127.8 (q,  $J = 32.2$  Hz), 127.3, 126.8 (q,  $J = 4.5$  Hz), 123.4 (q,  $J = 272.3$  Hz), 122.6, 122.4, 119.6, 21.5;  $^{19}\text{F}$  NMR (376 MHz,  $\text{CDCl}_3$ )  $\delta$  -58.15; HRMS (ESI) calcd for  $\text{C}_{21}\text{H}_{15}\text{F}_3\text{NO}_3\text{S}$  ( $\text{M}-\text{H}$ ) $^-$  418.0730, found 418.0749.



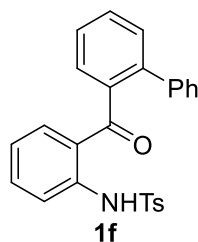

*N*-(2-(Biphenylcarbonyl)phenyl)-4-methylbenzenesulfonamide **1f** was obtained as a yellowish oil in 90% yield.  $R_f = 0.40$  (petroleum ether/ethyl acetate = 5:1);  $^1\text{H}$  NMR (400 MHz,  $\text{CDCl}_3$ ):  $\delta$  11.05 (br., s, 1H), 7.72 (d,  $J = 8.4$  Hz, 2H), 7.61 (dd,  $J = 8.4, 1.2$  Hz, 1H), 7.58-7.52 (m, 1H), 7.46 (dd,  $J = 8.0, 1.2$  Hz, 1H), 7.41-7.35 (m, 1H), 7.35-7.27 (m, 2H), 7.24-7.15 (m, 7H), 7.12 (dd,  $J = 7.6, 1.2$  Hz, 1H), 6.86-6.79 (m, 1H), 2.38 (s, 3H);  $^{13}\text{C}$  NMR (100 MHz,  $\text{CDCl}_3$ ):  $\delta$  202.0, 143.9, 141.1, 140.3, 139.8, 138.5, 136.7, 134.8, 134.5, 130.7, 130.3, 129.7, 128.7, 128.6, 128.5, 127.5, 127.3, 126.9, 123.3, 122.3, 119.0, 21.6; HRMS (ESI) calcd for  $\text{C}_{26}\text{H}_{22}\text{NO}_3\text{S}$  ( $\text{M}+\text{H}$ ) $^+$  428.1315, found 428.1319.

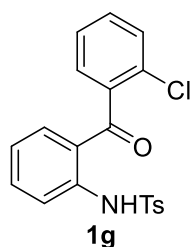

*N*-(2-(2-Chlorobenzoyl)phenyl)-4-methylbenzenesulfonamide **1g** was obtained as a yellow solid in 94% yield.  $R_f = 0.40$  (petroleum ether/ethyl acetate = 5:1); m.p. 116-117 °C;  $^1\text{H}$  NMR (400 MHz,  $\text{CDCl}_3$ ):  $\delta$  11.08 (br., s, 1H), 7.80 (dd,  $J = 8.4, 0.8$  Hz, 1H), 7.75 (d,  $J = 8.4$  Hz, 2H), 7.53-7.47 (m, 1H), 7.46-7.38 (m, 2H), 7.37-7.31 (m, 1H), 7.27-7.19 (m, 3H), 7.17-7.11 (m, 1H), 7.02-6.94 (m, 1H), 2.36 (s, 3H);  $^{13}\text{C}$  NMR (100 MHz,  $\text{CDCl}_3$ ):  $\delta$  198.7, 144.1, 140.6, 138.2, 136.5, 135.5, 134.6, 131.4, 130.9, 130.0, 129.8, 128.7, 127.4, 126.8, 122.9, 122.7, 120.0, 21.5; HRMS (ESI) calcd for  $\text{C}_{20}\text{H}_{15}\text{ClNO}_3\text{S}$  ( $\text{M}-\text{H}$ ) $^-$  384.0467, found 384.0487.

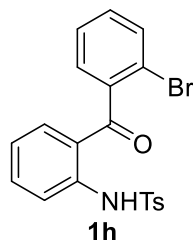

*N*-(2-(2-Bromobenzoyl)phenyl)-4-methylbenzenesulfonamide **1h** was obtained as a yellow solid in 92% yield.  $R_f = 0.30$  (petroleum ether/ethyl acetate = 5:1); m.p. 84-85 °C;  $^1\text{H}$  NMR (400 MHz,  $\text{CDCl}_3$ ):  $\delta$  11.10 (br., s, 1H), 7.82 (dd,  $J = 8.4, 0.8$  Hz, 1H), 7.77 (d,  $J = 8.0$  Hz,

2H), 7.59 (dd,  $J = 8.0, 1.6$  Hz, 1H), 7.53-7.46 (m, 1H), 7.42-7.31 (m, 2H), 7.23 (d,  $J = 8.0$  Hz, 3H), 7.12 (dd,  $J = 7.6, 2.0$  Hz, 1H), 7.01-6.93 (m, 1H), 2.37 (s, 3H);  $^{13}\text{C}$  NMR (100 MHz,  $\text{CDCl}_3$ ):  $\delta$  199.4, 144.0, 140.8, 140.2, 136.6, 135.5, 134.7, 133.1, 131.4, 129.8, 128.6, 127.4, 127.3, 122.9, 122.3, 119.9, 119.2, 21.5; HRMS (ESI) calcd for  $\text{C}_{20}\text{H}_{15}\text{BrNO}_3\text{S}$  ( $\text{M-H}$ ) $^-$  427.9962, found 427.9958.

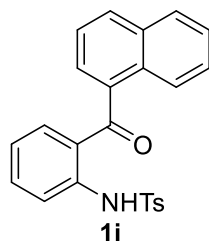

*N*-(2-(1-Naphthoyl)phenyl)-4-methylbenzenesulfonamide **1i** was obtained as a yellow solid in 94% yield.  $R_f = 0.40$  (petroleum ether/ethyl acetate = 5:1); m.p. 117-118 °C;  $^1\text{H}$  NMR (400 MHz,  $\text{CDCl}_3$ ):  $\delta$  11.00 (br., s, 1H), 7.97 (d,  $J = 8.4$  Hz, 1H), 7.92-7.82 (m, 2H), 7.74 (d,  $J = 8.4$  Hz, 2H), 7.63 (d,  $J = 8.0$  Hz, 1H), 7.54-7.47 (m, 2H), 7.45-7.37 (m, 2H), 7.27-7.22 (m, 1H), 7.19 (d,  $J = 8.0$  Hz, 2H), 7.10 (dd,  $J = 7.2, 1.2$  Hz, 1H), 6.97-6.89 (m, 1H), 2.35 (s, 3H);  $^{13}\text{C}$  NMR (100 MHz,  $\text{CDCl}_3$ ):  $\delta$  201.3, 144.0, 140.2, 136.5, 136.2, 134.9, 134.7, 133.5, 131.5, 130.5, 129.8, 128.5, 127.4, 127.4, 126.6, 125.4, 125.2, 124.2, 123.2, 121.3, 21.6; HRMS (ESI) calcd for  $\text{C}_{24}\text{H}_{18}\text{NO}_3\text{S}$  ( $\text{M-H}$ ) $^-$  400.1013, found 400.1038.

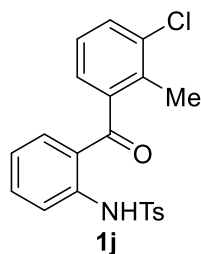

*N*-(2-(3-Chloro-2-methylbenzoyl)phenyl)-4-methylbenzenesulfonamide **1j** was obtained as a yellow solid in 89% yield.  $R_f = 0.40$  (petroleum ether/ethyl acetate = 5:1); m.p. 105-106 °C;  $^1\text{H}$  NMR (400 MHz,  $\text{CDCl}_3$ ):  $\delta$  11.09 (br., s, 1H), 7.80 (d,  $J = 8.4$  Hz, 1H), 7.73 (d,  $J = 8.4$  Hz, 2H), 7.54-7.43 (m, 2H), 7.23 (d,  $J = 7.6$  Hz, 3H), 7.16 (t,  $J = 7.6$  Hz, 1H), 7.02-6.94 (m, 1H), 6.84 (d,  $J = 7.6$  Hz, 1H), 2.37 (s, 3H), 2.08 (s, 3H);  $^{13}\text{C}$  NMR (100 MHz,  $\text{CDCl}_3$ ):  $\delta$  201.1, 144.0, 140.6, 136.5, 135.8, 135.4, 134.5, 133.6, 131.0, 129.7, 127.3, 126.5, 125.7, 123.3, 123.0, 120.4, 21.5, 17.0; HRMS (ESI) calcd for  $\text{C}_{21}\text{H}_{17}\text{ClNO}_3\text{S}$  ( $\text{M-H}$ ) $^-$  398.0623, found 398.0646.

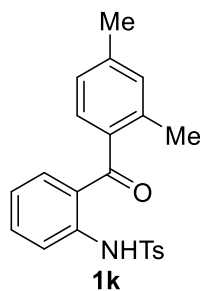

*N*-(2-(2,4-Dimethylbenzoyl)phenyl)-4-methylbenzenesulfonamide **1k** was obtained as a white solid in 91% yield.  $R_f = 0.40$  (petroleum ether/ethyl acetate = 5:1); m.p. 103-104 °C;  $^1\text{H}$  NMR (400 MHz,  $\text{CDCl}_3$ ):  $\delta$  10.92 (br., s, 1H), 7.79 (d,  $J = 8.4$  Hz, 1H), 7.69 (d,  $J = 8.4$  Hz, 2H), 7.50-7.44 (m, 1H), 7.29-7.23 (m, 1H), 7.17 (d,  $J = 8.0$  Hz, 2H), 7.06 (s, 1H), 7.01-6.93 (m, 2H), 6.75 (d,  $J = 8.0$  Hz, 1H), 2.36 (s, 3H), 2.34 (s, 3H), 2.12 (s, 3H);  $^{13}\text{C}$  NMR (100 MHz,  $\text{CDCl}_3$ ):  $\delta$  201.9, 143.9, 141.0, 140.0, 136.6, 136.4, 135.6, 134.5, 134.3, 131.8, 129.7, 128.7, 127.3, 125.8, 125.0, 123.0, 121.0, 21.5, 21.4, 19.7; HRMS (ESI) calcd for  $\text{C}_{22}\text{H}_{20}\text{NO}_3\text{S}$  ( $\text{M}-\text{H}$ ) $^-$  378.1169, found 378.1187.

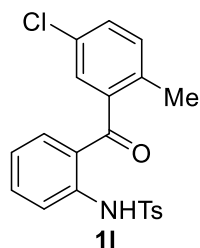

*N*-(2-(5-Chloro-2-methylbenzoyl)phenyl)-4-methylbenzenesulfonamide **1l** was obtained as a yellowish oil in 90% yield.  $R_f = 0.40$  (petroleum ether/ethyl acetate = 5:1);  $^1\text{H}$  NMR (400 MHz,  $\text{CDCl}_3$ ):  $\delta$  10.82 (br., s, 1H), 7.82 (d,  $J = 8.4$  Hz, 1H), 7.68 (d,  $J = 8.4$  Hz, 2H), 7.57-7.49 (m, 1H), 7.33 (dd,  $J = 8.4, 2.4$  Hz, 1H), 7.25-7.15 (m, 4H), 7.07-7.00 (m, 1H), 6.77 (d,  $J = 2.4$  Hz, 1H), 2.37 (s, 3H), 2.10 (s, 3H);  $^{13}\text{C}$  NMR (100 MHz,  $\text{CDCl}_3$ ):  $\delta$  200.4, 144.2, 140.2, 139.8, 136.2, 135.3, 134.6, 134.2, 132.4, 131.1, 130.4, 129.8, 127.6, 127.3, 124.1, 123.5, 121.4, 21.6, 19.0; HRMS (ESI) calcd for  $\text{C}_{21}\text{H}_{17}\text{ClNO}_3\text{S}$  ( $\text{M}-\text{H}$ ) $^-$  398.0623, found 398.0636.

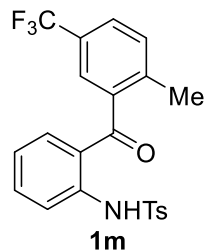

4-Methyl-*N*-(2-(2-methyl-5-(trifluoromethyl)benzoyl)phenyl)benzenesulfonamide **1m** was

obtained as a yellowish oil in 91% yield.  $R_f = 0.40$  (petroleum ether/ethyl acetate = 5:1);  $^1\text{H}$  NMR (400 MHz,  $\text{CDCl}_3$ ):  $\delta$  10.92 (br., s, 1H), 7.83 (dd,  $J = 8.4, 1.2$  Hz, 1H), 7.72 (d,  $J = 8.4$  Hz, 2H), 7.62 (dd,  $J = 8.4, 2.0$  Hz, 1H), 7.57-7.51 (m, 1H), 7.40 (d,  $J = 8.0$  Hz, 1H), 7.24-7.16 (m, 3H), 7.14 (s, 1H), 7.06-6.98 (m, 1H), 2.35 (s, 3H), 2.20 (s, 3H);  $^{13}\text{C}$  NMR (100 MHz,  $\text{CDCl}_3$ ):  $\delta$  200.5, 144.2, 140.5, 140.3, 139.0, 136.3, 135.5, 134.2, 131.6, 129.7, 128.0 (q,  $J = 32.7$  Hz), 127.3, 126.9 (q,  $J = 3.6$  Hz), 124.4 (q,  $J = 3.8$  Hz), 123.7 (q,  $J = 270.5$  Hz), 123.6, 123.3, 121.1, 21.4, 19.6;  $^{19}\text{F}$  NMR (376 MHz,  $\text{CDCl}_3$ )  $\delta$  -62.46; HRMS (ESI) calcd for  $\text{C}_{22}\text{H}_{17}\text{F}_3\text{NO}_3\text{S}$  ( $\text{M}-\text{H}$ ) $^-$  432.0887, found 432.0902.

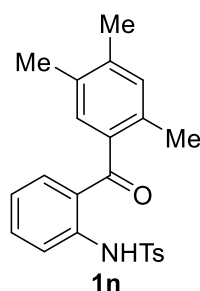

4-Methyl-*N*-(2-(2,4,5-trimethylbenzoyl)phenyl)benzenesulfonamide **1n** was obtained as a yellow solid in 90% yield.  $R_f = 0.55$  (petroleum ether/ethyl acetate = 5:1); m.p. 97-98 °C;  $^1\text{H}$  NMR (400 MHz,  $\text{CDCl}_3$ ):  $\delta$  10.95 (br., s, 1H), 7.79 (d,  $J = 8.0$  Hz, 1H), 7.70 (d,  $J = 8.0$  Hz, 2H), 7.51-7.44 (m, 1H), 7.31-7.26 (m, 1H), 7.18 (d,  $J = 8.0$  Hz, 2H), 7.02-6.95 (m, 2H), 6.64 (s, 1H), 2.34 (s, 3H), 2.26 (s, 3H), 2.18 (s, 3H), 2.05 (s, 3H);  $^{13}\text{C}$  NMR (100 MHz,  $\text{CDCl}_3$ ):  $\delta$  202.1, 143.8, 140.0, 139.6, 136.5, 136.0, 134.5, 134.4, 133.8, 133.4, 132.3, 129.6, 129.6, 127.3, 125.0, 123.1, 121.0, 21.5, 19.7, 19.2, 19.1; HRMS (ESI) calcd for  $\text{C}_{23}\text{H}_{22}\text{NO}_3\text{S}$  ( $\text{M}-\text{H}$ ) $^-$  392.1326, found 392.1338.

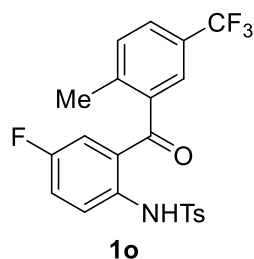

(2-Amino-5-fluorophenyl)(2-methyl-5-(trifluoromethyl)phenyl)methanone **1o** was obtained as a yellowish oil in 91% yield.  $R_f = 0.20$  (petroleum ether/ethyl acetate 8:1);  $^1\text{H}$  NMR (400 MHz,  $\text{CDCl}_3$ ):  $\delta$  10.43 (br., s, 1H), 7.87 (dd,  $J = 9.2, 4.8$  Hz, 1H), 7.64 (d,  $J = 8.4$  Hz, 3H), 7.41 (d,  $J = 8.4$  Hz, 1H), 7.32-7.25 (m, 1H), 7.20 (d,  $J = 8.0$  Hz, 2H), 7.02 (s, 1H), 6.83 (dd,  $J = 8.4, 2.8$  Hz, 1H), 2.34 (s, 3H), 2.20 (s, 3H);  $^{13}\text{C}$  NMR (100 MHz,  $\text{CDCl}_3$ ):  $\delta$  199.1 (d,  $^4J_{\text{C-F}} = 2.1$  Hz), 158.1 (d,  $^1J_{\text{C-F}} = 245.1$  Hz), 144.4, 140.6, 138.1, 136.3, 136.2, 135.9, 131.8, 129.8, 128.1 (q,  $J = 32.9$  Hz), 127.4 (q,  $J = 3.5$  Hz), 127.2, 125.7 (d,  $^3J_{\text{C-F}} = 5.8$  Hz), 124.6, 124.5,

124.4 (q,  $J = 3.8$  Hz), 123.6 (q,  $J = 270.5$  Hz), 122.6 (d,  $^2J_{C-F} = 22.4$  Hz), 119.6 (d,  $^2J_{C-F} = 23.5$  Hz), 21.4, 19.6;  $^{19}\text{F}$  NMR (376 MHz,  $\text{CDCl}_3$ )  $\delta$  -62.49, -116.35; HRMS (ESI) calcd for  $\text{C}_{22}\text{H}_{16}\text{F}_4\text{NO}_3\text{S}$  ( $\text{M}-\text{H}$ ) $^-$  450.0793, found 450.0806.

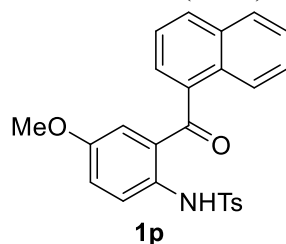

*N*-(2-(1-Naphthoyl)-4-methoxyphenyl)-4-methylbenzenesulfonamide **1p** was obtained as a white solid in 93% yield.  $R_f = 0.30$  (petroleum ether/ethyl acetate 5:1); m.p. 104-105 °C;  $^1\text{H}$  NMR (400 MHz,  $\text{CDCl}_3$ ):  $\delta$  10.13 (br., s, 1H), 7.97 (d,  $J = 8.4$  Hz, 1H), 7.89 (d,  $J = 8.4$  Hz, 1H), 7.83 (d,  $J = 9.2$  Hz, 1H), 7.70 (dd,  $J = 8.4, 1.20$  Hz, 1H), 7.59 (d,  $J = 8.0$  Hz, 2H), 7.55-7.49 (m, 1H), 7.47-7.39 (m, 1H), 7.38-7.32 (m, 1H), 7.13-7.07 (m, 3H), 6.88 (dd,  $J = 7.2, 1.2$  Hz, 1H), 6.69 (d,  $J = 3.2$  Hz, 1H), 3.56 (s, 3H), 2.31 (s, 3H);  $^{13}\text{C}$  NMR (100 MHz,  $\text{CDCl}_3$ ):  $\delta$  200.3, 155.7, 143.7, 136.1, 135.5, 133.6, 132.4, 132.0, 130.6, 129.7, 128.6, 128.5, 128.2, 127.6, 127.4, 126.6, 125.4, 125.2, 123.9, 119.9, 118.9, 55.6, 21.5; HRMS (ESI) calcd for  $\text{C}_{25}\text{H}_{22}\text{NO}_4\text{S}$  ( $\text{M}+\text{H}$ ) $^+$  432.1264, found 432.1272.

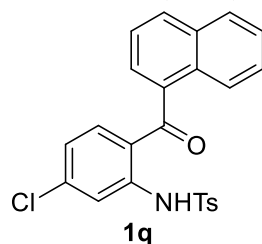

*N*-(2-(1-Naphthoyl)-5-chlorophenyl)-4-methylbenzenesulfonamide **1q** was obtained as a yellow solid in 94% yield.  $R_f = 0.40$  (petroleum ether/ethyl acetate = 5:1); m.p. 109-110 °C;  $^1\text{H}$  NMR (400 MHz,  $\text{CDCl}_3$ ):  $\delta$  11.15 (br., s, 1H), 7.99 (d,  $J = 8.0$  Hz, 1H), 7.90 (d,  $J = 8.0$  Hz, 1H), 7.87 (d,  $J = 2.0$  Hz, 1H), 7.79 (d,  $J = 8.0$  Hz, 2H), 7.59 (d,  $J = 8.4$  Hz, 1H), 7.55-7.50 (m, 1H), 7.47-7.39 (m, 2H), 7.27-7.22 (m, 2H), 7.21-7.15 (m, 2H), 6.88 (dd,  $J = 8.4, 2.0$  Hz, 1H), 2.39 (s, 3H);  $^{13}\text{C}$  NMR (100 MHz,  $\text{CDCl}_3$ ):  $\delta$  200.5, 144.3, 141.5, 141.3, 136.3, 135.9, 135.8, 133.6, 131.7, 130.4, 129.9, 128.6, 127.5, 127.4, 127.2, 126.7, 125.0, 124.3, 123.2, 123.1, 120.6, 21.6; HRMS (ESI) calcd for  $\text{C}_{24}\text{H}_{17}\text{ClNO}_3\text{S}$  ( $\text{M}-\text{H}$ ) $^-$  434.0623, found 434.0642.

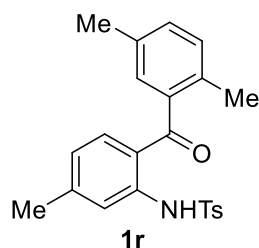

*N*-(2-(2,5-Dimethylbenzoyl)-5-methylphenyl)-4-methylbenzenesulfonamide **1r** was obtained as a white solid in 90% yield.  $R_f = 0.40$  (petroleum ether/ethyl acetate = 5:1); m.p. 110-111 °C;  $^1\text{H}$  NMR (400 MHz,  $\text{CDCl}_3$ ):  $\delta$  10.18 (br., s, 1H), 7.73 (d,  $J = 8.4$  Hz, 2H), 7.61 (s, 1H), 7.21 (d,  $J = 8.4$  Hz, 2H), 7.18-7.12 (m, 2H), 7.11-7.07 (m, 1H), 6.78 (dd,  $J = 8.0, 1.6$  Hz, 1H), 6.72 (d,  $J = 2.0$  Hz, 1H), 2.37 (s, 3H), 2.36 (s, 3H), 2.28 (s, 3H), 2.02 (s, 3H);  $^{13}\text{C}$  NMR (100 MHz,  $\text{CDCl}_3$ ):  $\delta$  202.1, 146.4, 143.8, 140.4, 138.8, 136.6, 134.8, 134.7, 132.5, 130.9, 130.7, 129.8, 129.6, 128.1, 127.9, 127.3, 124.0, 121.7, 121.0, 22.1, 21.5, 20.9, 19.0; HRMS (ESI) calcd for  $\text{C}_{23}\text{H}_{22}\text{NO}_3\text{S}$  ( $\text{M}-\text{H}$ ) $^-$  392.1326, found 392.1323.

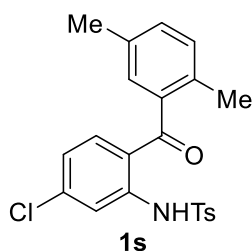

*N*-(5-Chloro-2-(2,5-dimethylbenzoyl)phenyl)-4-methylbenzenesulfonamide **1s** was obtained as a yellow solid in 89% yield.  $R_f = 0.40$  (petroleum ether/ethyl acetate = 5:1); m.p. 108-109 °C;  $^1\text{H}$  NMR (400 MHz,  $\text{CDCl}_3$ ):  $\delta$  11.20 (br., s, 1H), 7.82 (d,  $J = 2.0$  Hz, 1H), 7.76 (d,  $J = 8.0$  Hz, 2H), 7.27-7.22 (m, 3H), 7.21-7.16 (m, 1H), 7.15-7.09 (m, 1H), 6.93 (dd,  $J = 8.4, 2.0$  Hz, 1H), 6.74 (s, 1H), 2.38 (s, 3H), 2.29 (s, 3H), 2.05 (s, 3H);  $^{13}\text{C}$  NMR (100 MHz,  $\text{CDCl}_3$ ):  $\delta$  201.6, 144.3, 141.5, 141.2, 138.1, 136.3, 135.6, 135.1, 132.8, 131.4, 130.9, 129.8, 128.2, 127.3, 123.1, 122.1, 120.1, 21.6, 20.9, 19.0; HRMS (ESI) calcd for  $\text{C}_{22}\text{H}_{19}\text{ClNO}_3\text{S}$  ( $\text{M}-\text{H}$ ) $^-$  412.0780, found 412.0795.

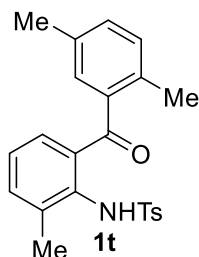

*N*-(2-(2,5-Dimethylbenzoyl)-6-methylphenyl)-4-methylbenzenesulfonamide **1t** was obtained as a colorless oil in 82% yield.  $R_f = 0.60$  (petroleum ether/ethyl acetate = 5:1);  $^1\text{H}$  NMR (400 MHz,  $\text{CDCl}_3$ ):  $\delta$  9.25 (br., s, 1H), 7.54-7.41 (m, 3H), 7.16-7.05 (m, 3H), 7.04-6.94 (m, 3H), 6.22 (s, 1H), 2.66 (s, 3H), 2.23 (s, 6H), 2.17 (s, 3H);  $^{13}\text{C}$  NMR (100 MHz,  $\text{CDCl}_3$ ):  $\delta$  200.1, 143.4, 139.9, 136.4, 136.3, 135.9, 135.7, 135.4, 133.7, 133.1, 131.8, 131.2, 130.8, 130.8, 129.3, 128.0, 125.9, 21.4, 20.9, 19.9, 19.8; HRMS (ESI) calcd for  $\text{C}_{23}\text{H}_{24}\text{NO}_3\text{S}$  ( $\text{M}+\text{H}$ ) $^+$  394.1471, found 394.1484.

## General Procedure for the Atroposelective Aza-Michael-aldol-aromatization Sequence

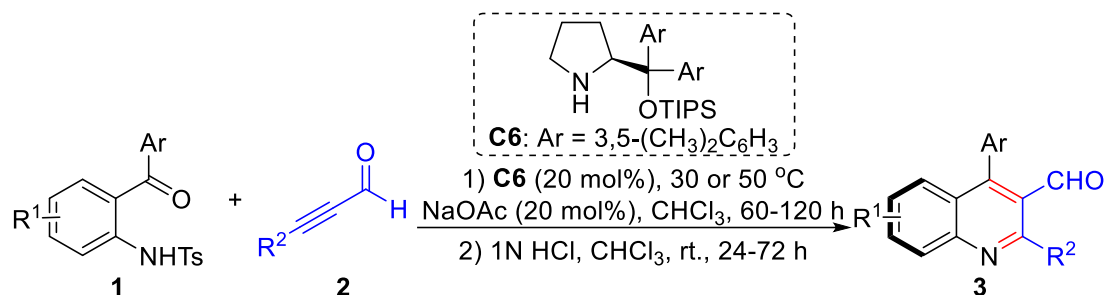

To a flame dried sealed tube equipped with a magnetic stirring bar were added 2-(tosylamino)aryl ketones **1** (0.10 mmol), catalyst **C6** (9.3 mg, 0.020 mmol), NaOAc (1.6 mg, 0.020 mmol), 2-alkynals **2** (0.12 mmol) and anhydrous chloroform (1.0 mL) successively. The mixture was stirred at 30 °C or 50 °C for 60-120 h. After full conversion of the first step as detected by TLC, chloroform (1.0 mL) and 1N HCl (1.5 mL) were added to the reaction mixture for the second step, and the resulting solution was stirred at room temperature for another 24-72 h. Then the reaction was diluted with ethyl acetate (10 mL) and neutralized with saturated NaHCO<sub>3</sub> solution (10 mL). The organic layer is separated, and the aqueous layer is extracted with ethyl acetate (2 × 10 mL). The combined organic phases were washed with brine, dried over anhydrous Na<sub>2</sub>SO<sub>4</sub>, filtered and concentrated in vacuo to give a crude residue which was purified by flash column chromatography (petroleum ether/ethyl acetate = 30:1 to 5:1) to give **3**.

### Procedure for the Scale-up Experiment

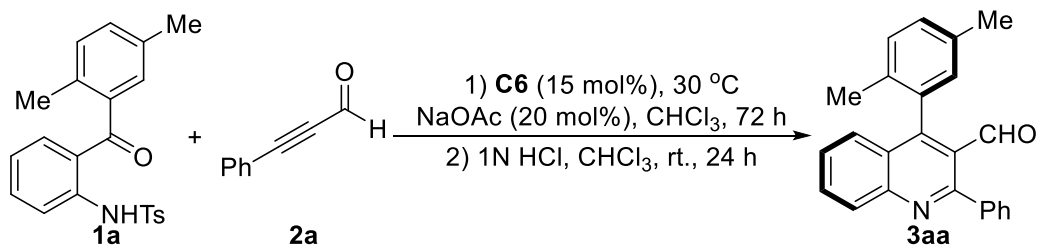

To a flame dried sealed tube (120 mL) equipped with a magnetic stirring bar were added *N*-(2-(2,5-dimethylbenzoyl)phenyl)-4-methylbenzenesulfonamide **1a** (379.1 mg, 1.0 mmol), catalyst **C6** (69.8 mg, 0.15 mmol), NaOAc (16.4 mg, 0.20 mmol), 3-phenylpropionaldehyde **2a** (156.1 mg, 1.20 mmol) and anhydrous chloroform (10.0 mL) successively. The mixture was stirred at 30 °C for 72 h. After full conversion of the first step as detected by TLC, 1N HCl (15.0 mL) were added to the reaction mixture for the second step, and the resulting solution was stirred at room temperature for another 24 h. Then the reaction was diluted with ethyl acetate (30 mL) and neutralized with saturated NaHCO<sub>3</sub> solution (20 mL). The organic layer is separated, and the aqueous layer is extracted with ethyl acetate (2 × 30 mL). The

combined organic phases were washed with brine, dried over anhydrous Na<sub>2</sub>SO<sub>4</sub>, filtered and concentrated in vacuo to give a crude residue which was purified by flash column chromatography (petroleum ether/ethyl acetate = 20:1 to 5:1) to give **3aa** as a yellow oil in 92% yield (311.4 mg) and 93% ee.

### Procedure for the Stepwise Synthesis

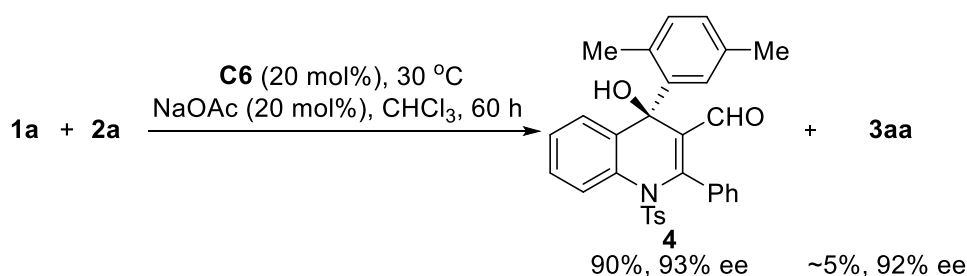

To a flame dried sealed tube equipped with a magnetic stirring bar were added **1a** (75.8 mg, 0.20 mmol), catalyst **C6** (18.6 mg, 0.040 mmol), NaOAc (3.3 mg, 0.040 mmol), **2a** (31.2 mg, 0.24 mmol) and anhydrous chloroform (2.0 mL) successively. The mixture was stirred at 30 °C for 60 h. Solvent was evaporated, the crude mixture was purified by column chromatography on silica gel (petroleum ether/ethyl acetate = 70:30) to give **4** in 90% yield (91.6 mg) and 93% ee along with **3aa** (3.4 mg, 5% yield, 92% ee).

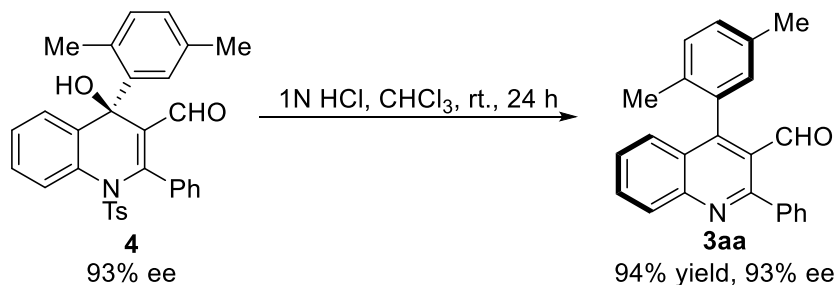

To a stirred solution of aldehyde **4** (50.9 mg, 0.10 mmol) in CHCl<sub>3</sub> (1.0 mL), 1N HCl (1.5 mL) were added, and the resulting solution was stirred at room temperature for 24 h. Then the reaction was diluted with ethyl acetate (10 mL) and neutralized with saturated NaHCO<sub>3</sub> solution (10 mL). The organic layer is separated, and the aqueous layer is extracted with ethyl acetate (2 × 10 mL). The combined organic phases were washed with brine, dried over anhydrous Na<sub>2</sub>SO<sub>4</sub>, filtered and concentrated in vacuo to give a crude residue which was purified by flash column chromatography (petroleum ether/ethyl acetate = 20:1 to 5:1) to give **3aa** in 94% yield (31.7 mg) and 93% ee.



### Procedure for the Transformations of Products 3

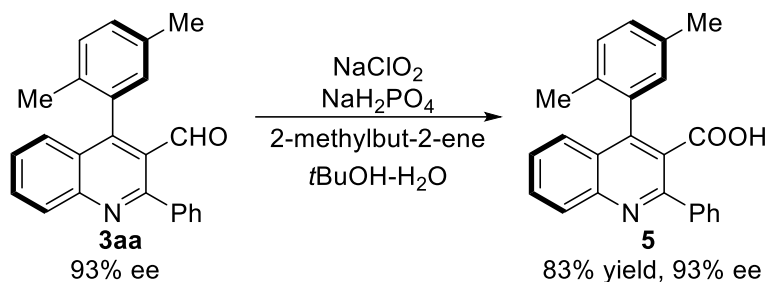

To a suspension of compound **3aa** (33.7 mg, 0.10 mmol) and 2-methylbut-2-ene (911.7 mg, 1.3 mmol) in *t*BuOH (3.0 mL) were added a saturated solution of NaClO<sub>2</sub> (33.5 mg, 0.37 mmol) and NaH<sub>2</sub>PO<sub>4</sub> (56.0 mg, 0.50 mmol). The mixture was stirred at room temperature for 3 h. The mixture was quenched with saturated NH<sub>4</sub>Cl (10 mL) and extracted with EtOAc (4 × 10 mL). The combined organic layers were washed with brine, dried over anhydrous Na<sub>2</sub>SO<sub>4</sub>, filtered and concentrated in vacuo to give a crude residue which was purified by flash column chromatography (petroleum ether/ethyl acetate = 70:30) to give **5** as a yellow solid in 83% yield (29.3 mg) and 93% ee.<sup>3</sup>

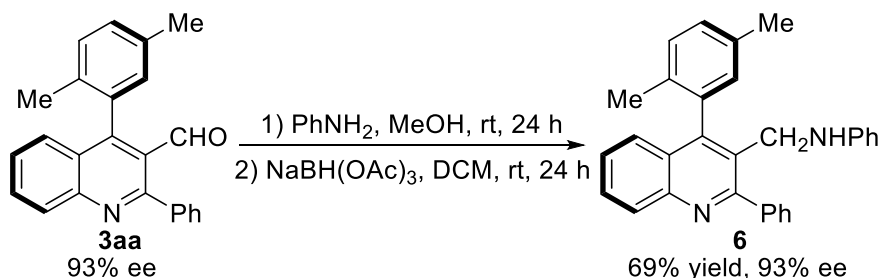

To a suspension of (*S*)-**3aa** (33.7 mg, 0.10 mmol) in methanol (3.0 mL) were added aniline (10.0 uL, 0.11 mmol) and 4-toluenesulfonic acid monohydrate (3.8 mg, 0.020 mmol). After stirring at room temperature for 24 h, the mixture was concentrated in vacuo. Then, DCM (2.0 mL), NaBH(OAc)<sub>3</sub> (63.6 mg, 0.30 mmol) and CH<sub>3</sub>COOH (17.0 uL, 0.30 mmol) were added successively. The mixture was stirred at room temperature for another 24 h, quenched with sat. NaHCO<sub>3</sub> (10 mL) and extracted with ethyl acetate (3 × 10 mL). The combined organic layers were washed with brine, dried over anhydrous Na<sub>2</sub>SO<sub>4</sub>, filtered and concentrated in vacuo to give a crude residue which was purified by flash column chromatography (petroleum ether/ethyl acetate = 90:10) to give **6** as a yellow solid in 69% yield (28.6 mg) and 93% ee.

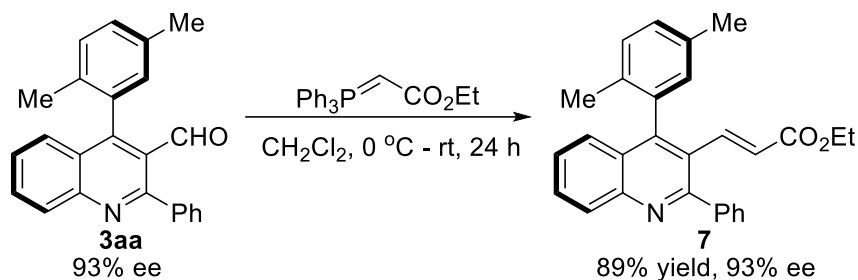

To a stirred solution of aldehyde (*S*)-**3aa** (33.7 mg, 0.10 mmol) in CH<sub>2</sub>Cl<sub>2</sub> (2.0 mL) was added ethyl 2-(triphenylphosphoranylidene)acetate (41.8 mg, 0.12 mmol) at 0 °C. The resultant mixture was allowed to warm to rt and stirred for 24 h. The crude mixture was purified by column chromatography on silica gel (petroleum ether/ethyl acetate = 90:10) to give **7** as a yellow oil in 89% yield (36.2 mg) and 93% ee.<sup>4</sup>

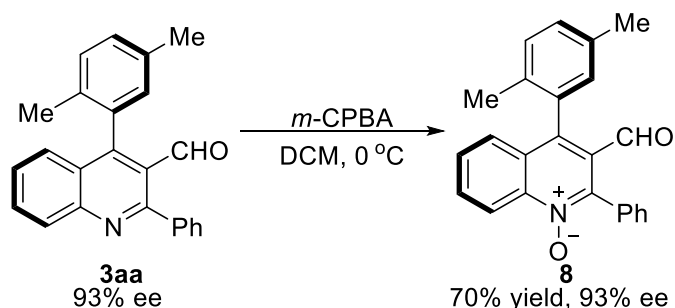

*m*-CPBA (40.6 mg, 85%, 0.20 mmol) was added to a solution of (*S*)-**3aa** (33.7 mg, 0.10 mmol) in CH<sub>2</sub>Cl<sub>2</sub> (2.0 mL) at 0 °C. After stirring for 24 h, the reaction mixture was quenched with sat. Na<sub>2</sub>SO<sub>3</sub> (5 mL) and stirred at this temperature for 10 minutes. Then, saturated aqueous NaHCO<sub>3</sub> solution (5 mL) was added. After being extracted with CH<sub>2</sub>Cl<sub>2</sub> (3 × 10 mL), the organic phases were combined and washed with brine, dried over anhydrous Na<sub>2</sub>SO<sub>4</sub>, filtered and concentrated in vacuo to give a crude residue which was purified by flash column chromatography (petroleum ether/ethylacetate = 70:30) to give **8** as a yellowish oil in 70% yield (24.7 mg) and 93% ee.<sup>2</sup>

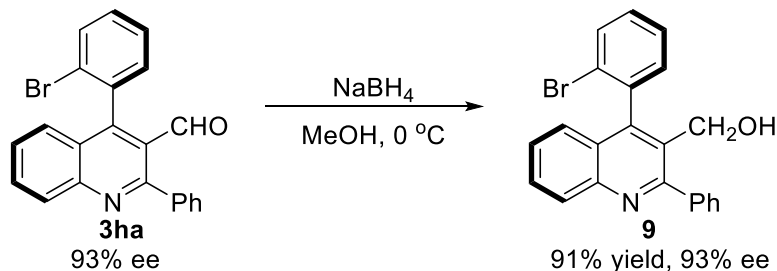

To a suspension of (*S*)-**3ha** (38.7 mg, 0.10 mmol) in methanol (3.0 mL) was added NaBH<sub>4</sub> (7.6 mg, 0.20 mmol) at 0 °C. After stirring at this temperature for 20 minutes, the mixture was

quenched with sat.  $\text{NH}_4\text{Cl}$  (10 mL) at 0 °C and extracted with ethyl acetate ( $3 \times 10$  mL). The combined organic layers were washed with brine, dried over anhydrous  $\text{Na}_2\text{SO}_4$ , filtered and concentrated in vacuo to give a crude residue which was purified by flash column chromatography (petroleum ether/ethyl acetate = 70:30) to give **9** as a white solid in 91% yield (35.4 mg) and 93% ee.<sup>2</sup>

### Analytic Data for the Products

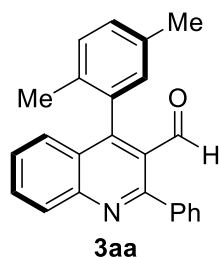

4-(2,5-Dimethylphenyl)-2-phenylquinoline-3-carbaldehyde **3aa** was obtained as a yellowish oil in 96% yield (32.3 mg) and 94% ee (step 1, 30 °C, 60 h; step 2, rt, 24 h).  $R_f$  = 0.40 (petroleum ether/ethyl acetate 10:1). The ee value was determined by chiral stationary phase HPLC analysis [Daicel Chiralpak IC, isopropanol/hexane (10:90), 1.0 mL/min,  $\lambda$  = 254 nm,  $t_r$  (major) = 6.98 min,  $t_r$  (minor) = 7.56 min].  $[\alpha]_D^{25}$  = -9.00 ( $c$  = 1.0, EtOAc);  $^1\text{H}$  NMR (400 MHz,  $\text{CDCl}_3$ ):  $\delta$  10.02 (s, 1H), 8.24 (d,  $J$  = 8.4 Hz, 1H), 7.84-7.77 (m, 1H), 7.69-7.63 (m, 2H), 7.53-7.43 (m, 5H), 7.28-7.20 (m, 2H), 6.98 (s, 1H), 2.36 (s, 3H), 1.97 (s, 3H);  $^{13}\text{C}$  NMR (100 MHz,  $\text{CDCl}_3$ ):  $\delta$  192.3, 159.2, 152.4, 148.7, 139.6, 135.3, 134.3, 133.2, 132.1, 130.0, 129.9, 129.8, 129.7, 129.6, 129.0, 128.5, 127.5, 127.2, 126.5, 126.2, 21.1, 19.5; HRMS (ESI) calcd for  $\text{C}_{24}\text{H}_{20}\text{NO}$  ( $\text{M}+\text{H}$ )<sup>+</sup> 338.1539, found 338.1541.

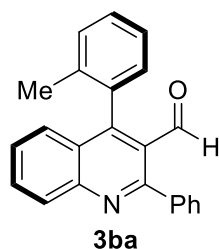

2-Phenyl-4-*o*-tolylquinoline-3-carbaldehyde **3ba** was obtained as a yellow solid in 95% yield (30.7 mg) and 93% ee (step 1, 30 °C, 60 h; step 2, rt, 24 h).  $R_f$  = 0.40 (petroleum ether/ethyl acetate 10:1). The ee value was determined by chiral stationary phase HPLC analysis [Daicel Chiralpak AD-H, isopropanol/hexane (10:90), 1.0 mL/min,  $\lambda$  = 254 nm,  $t_r$  (minor) = 7.42 min,  $t_r$  (major) = 9.68 min]. m.p. 111-112 °C;  $[\alpha]_D^{25}$  = -6.34 ( $c$  = 1.0, EtOAc);  $^1\text{H}$  NMR (400 MHz,  $\text{CDCl}_3$ ):  $\delta$  10.01 (s, 1H), 8.26 (d,  $J$  = 8.4 Hz, 1H), 7.88-7.78 (m, 1H), 7.72-7.61 (m, 2H), 7.57-7.46 (m, 4H), 7.46-7.30 (m, 4H), 7.16 (d,  $J$  = 7.6 Hz, 1H), 2.02 (s, 3H);  $^{13}\text{C}$  NMR (100

MHz, CDCl<sub>3</sub>):  $\delta$  192.2, 159.4, 151.9, 148.7, 139.4, 136.2, 134.6, 132.1, 130.1, 129.9, 129.1, 129.0, 128.8, 128.6, 127.5, 127.1, 126.4, 126.2, 125.8, 20.0; HRMS (ESI) calcd for C<sub>23</sub>H<sub>18</sub>NO (M+H)<sup>+</sup> 324.1383, found 324.1389.

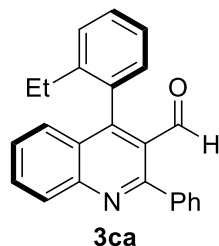

4-(2-Ethylphenyl)-2-phenylquinoline-3-carbaldehyde **3ca** was obtained as a yellowish oil in 86% yield (29.0 mg) and 97% ee (step 1, 30 °C, 72 h; step 2, rt, 24 h). *R*<sub>f</sub> = 0.50 (petroleum ether/ethyl acetate 10:1). The ee value was determined by chiral stationary phase HPLC analysis [Daicel Chiralpak AD-H, isopropanol/hexane (10:90), 1.0 mL/min,  $\lambda$  = 254 nm, *t*<sub>r</sub> (minor) = 6.30 min, *t*<sub>r</sub> (major) = 8.28 min]. [ $\alpha$ ]<sub>D</sub><sup>25</sup> = −17.85 (c = 1.0, EtOAc); <sup>1</sup>H NMR (400 MHz, CDCl<sub>3</sub>):  $\delta$  10.01 (s, 1H), 8.25 (d, *J* = 8.8 Hz, 1H), 7.87-7.79 (m, 1H), 7.66 (d, *J* = 6.4 Hz, 2H), 7.57-7.40 (m, 7H), 7.34 (t, *J* = 7.2 Hz, 1H), 7.14 (d, *J* = 7.2 Hz, 1H), 2.39-2.25 (m, 2H), 1.02 (t, *J* = 7.6 Hz, 3H); <sup>13</sup>C NMR (100 MHz, CDCl<sub>3</sub>):  $\delta$  192.2, 159.3, 152.1 148.5, 142.1, 139.4, 133.9, 132.1, 129.8, 129.8, 129.2, 129.1, 129.0, 128.5, 128.3, 127.4, 127.3, 126.6, 125.8, 26.4, 14.7; HRMS (ESI) calcd for C<sub>24</sub>H<sub>20</sub>NO (M+H)<sup>+</sup> 338.1539, found 338.1545.

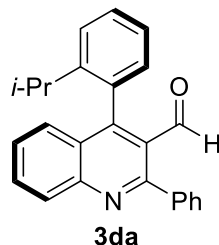

4-(2-Isopropylphenyl)-2-phenylquinoline-3-carbaldehyde **3da** was obtained as a yellowish oil in 81% yield (28.4 mg) and 99% ee (step 1, 30 °C, 72 h; step 2, rt, 24 h). *R*<sub>f</sub> = 0.50 (petroleum ether/ethyl acetate 10:1). The ee value was determined by chiral stationary phase HPLC analysis [Daicel Chiralpak AD-H, isopropanol/hexane (10:90), 1.0 mL/min,  $\lambda$  = 254 nm, *t*<sub>r</sub> (minor) = 4.87 min, *t*<sub>r</sub> (major) = 7.65 min]. [ $\alpha$ ]<sub>D</sub><sup>25</sup> = −20.63 (c = 1.0, EtOAc); <sup>1</sup>H NMR (400 MHz, CDCl<sub>3</sub>):  $\delta$  10.02 (s, 1H), 8.27 (d, *J* = 8.8 Hz, 1H), 7.88-7.79 (m, 1H), 7.70-7.62 (m, 2H), 7.58-7.41 (m, 7H), 7.36-7.29 (m, 1H), 7.11 (d, *J* = 7.6 Hz, 1H), 2.53-2.39 (m, 1H), 1.13 (d, *J* = 7.2 Hz, 3H), 1.04 (d, *J* = 6.8 Hz, 3H); <sup>13</sup>C NMR (100 MHz, CDCl<sub>3</sub>):  $\delta$  192.1, 159.2, 152.3, 148.3, 147.0, 139.3, 133.1, 132.1, 129.8, 129.7, 129.2, 129.1, 129.0, 128.5, 127.4, 127.3,

126.8, 126.7, 125.8, 125.7, 31.0, 24.1, 23.7; HRMS (ESI) calcd for  $C_{25}H_{22}NO$  ( $M+H$ )<sup>+</sup> 352.1696, found 352.1704.

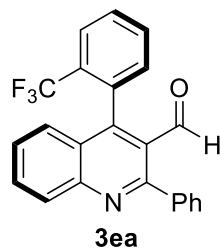

2-Phenyl-4-(2-(trifluoromethyl)phenyl)quinoline-3-carbaldehyde **3ea** was obtained as a yellowish oil in 85% yield (32.2 mg) and 98% ee (step 1, 30 °C, 60 h; step 2, rt, 48 h).  $R_f$  = 0.50 (petroleum ether/ethyl acetate 10:1). The ee value was determined by chiral stationary phase HPLC analysis [Daicel Chiralpak AD-H, isopropanol/hexane (10:90), 1.0 mL/min,  $\lambda$  = 254 nm,  $t_r$  (major) = 8.44 min,  $t_r$  (minor) = 9.07 min].  $[\alpha]_D^{25}$  = -5.14 ( $c$  = 1.0, EtOAc);  $^1H$  NMR (400 MHz,  $CDCl_3$ ):  $\delta$  9.98 (s, 1H), 8.29 (d,  $J$  = 8.8 Hz, 1H), 7.91-7.81 (m, 2H), 7.74-7.63 (m, 4H), 7.59-7.47 (m, 4H), 7.35-7.29 (m, 2H);  $^{13}C$  NMR (100 MHz,  $CDCl_3$ ):  $\delta$  191.5, 159.7, 148.3, 148.1, 138.4, 134.4 (q,  $J$  = 2.0 Hz), 132.2, 131.6, 130.8, 130.2, 130.1, 129.6, 129.4, 128.8 (q,  $J$  = 30.4 Hz), 128.7, 128.6, 127.5, 127.4, 127.0, 126.6, 126.4 (q,  $J$  = 4.9 Hz), 125.9, 123.7 (q,  $J$  = 272.3 Hz);  $^{19}F$  NMR (376 MHz,  $CDCl_3$ )  $\delta$  -59.64; HRMS (ESI) calcd for  $C_{23}H_{15}F_3NO$  ( $M+H$ )<sup>+</sup> 378.1100, found 378.1108.

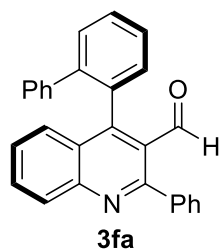

4-(Biphenyl-2-yl)-2-phenylquinoline-3-carbaldehyde **3fa** was obtained as a white solid in 64% yield (24.7 mg) and 98% ee (step 1, 50 °C, 120 h; step 2, rt, 24 h).  $R_f$  = 0.30 (petroleum ether/ethyl acetate 10:1). The ee value was determined by chiral stationary phase HPLC analysis [Daicel Chiralpak AD-H, isopropanol/hexane (10:90), 1.0 mL/min,  $\lambda$  = 254 nm,  $t_r$  (minor) = 7.90 min,  $t_r$  (major) = 10.01 min]. m.p. 106-107 °C;  $[\alpha]_D^{25}$  = -7.67 ( $c$  = 1.0, EtOAc);  $^1H$  NMR (400 MHz,  $CDCl_3$ ):  $\delta$  9.77 (s, 1H), 8.17 (d,  $J$  = 8.4 Hz, 1H), 7.83-7.76 (m, 1H), 7.72 (d,  $J$  = 8.4 Hz, 1H), 7.63-7.57 (m, 1H), 7.56-7.48 (m, 3H), 7.47-7.37 (m, 5H), 7.33 (d,  $J$  = 8.0 Hz, 1H), 7.10-6.95 (m, 5H);  $^{13}C$  NMR (100 MHz,  $CDCl_3$ ):  $\delta$  192.0, 159.3, 151.4, 148.5, 142.0, 140.4, 139.2, 133.7, 131.9, 130.2, 130.1, 129.8, 129.7, 129.1, 129.0, 128.9, 128.5, 127.9, 127.5, 127.4, 127.3, 127.1, 126.8, 126.5; HRMS (ESI) calcd for  $C_{28}H_{20}NO$  ( $M+H$ )<sup>+</sup> 386.1539,

found 386.1543.

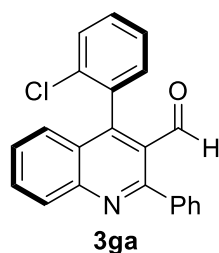

4-(2-Chlorophenyl)-2-phenylquinoline-3-carbaldehyde **3ga** was obtained as a yellow solid in 93% yield (32.0 mg) and 90% ee (step 1, 30 °C, 72 h; step 2, rt, 48 h).  $R_f$  = 0.40 (petroleum ether/ethyl acetate 10:1). The ee value was determined by chiral stationary phase HPLC analysis [Daicel Chiralpak AD-H, isopropanol/hexane (10:90), 1.0 mL/min,  $\lambda$  = 254 nm,  $t_r$  (minor) = 9.55 min,  $t_r$  (major) = 10.26 min]. m.p. 116-117 °C;  $[\alpha]_D^{25}$  = +52.15 ( $c$  = 1.2, EtOAc);  $^1\text{H}$  NMR (400 MHz,  $\text{CDCl}_3$ ):  $\delta$  10.02 (s, 1H), 8.28 (d,  $J$  = 8.4 Hz, 1H), 7.88-7.82 (m, 1H), 7.73-7.67 (m, 2H), 7.61-7.48 (m, 6H), 7.48-7.42 (m, 2H), 7.33-7.27 (m, 1H);  $^{13}\text{C}$  NMR (100 MHz,  $\text{CDCl}_3$ ):  $\delta$  191.5, 159.6, 148.8, 148.1, 138.8, 134.5, 132.8, 132.1, 130.8, 130.0, 130.0, 129.9, 129.7, 129.3, 128.7, 127.6, 126.9, 126.7, 126.2, 125.9; HRMS (ESI) calcd for  $\text{C}_{22}\text{H}_{15}\text{ClNO}$  ( $\text{M}+\text{H}$ ) $^+$  344.0837, found 344.0842.

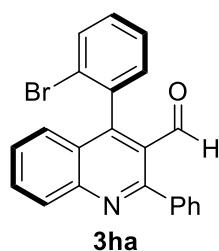

4-(2-Bromophenyl)-2-phenylquinoline-3-carbaldehyde **3ha** was obtained as a yellowish oil in 94% yield (36.4 mg) and 93% ee (step 1, 30 °C, 72 h; step 2, rt, 24 h).  $R_f$  = 0.30 (petroleum ether/ethyl acetate 10:1). The ee value was determined by chiral stationary phase HPLC analysis [Daicel Chiralpak AD-H, isopropanol/hexane (05:95), 1.0 mL/min,  $\lambda$  = 254 nm,  $t_r$  (minor) = 14.34 min,  $t_r$  (major) = 15.28 min].  $[\alpha]_D^{25}$  = +42.08 ( $c$  = 1.2, EtOAc);  $^1\text{H}$  NMR (400 MHz,  $\text{CDCl}_3$ ):  $\delta$  10.03 (s, 1H), 8.27 (d,  $J$  = 8.0 Hz, 1H), 7.88-7.81 (m, 1H), 7.76 (dd,  $J$  = 8.0, 1.2 Hz, 1H), 7.72-7.67 (m, 2H), 7.58-7.47 (m, 5H), 7.45-7.37 (m, 2H), 7.30 (dd,  $J$  = 7.6, 1.6 Hz, 1H);  $^{13}\text{C}$  NMR (100 MHz,  $\text{CDCl}_3$ ):  $\delta$  191.5, 159.6, 149.7, 148.9, 138.9, 136.6, 132.9, 132.2, 130.8, 130.1, 130.1, 129.9, 129.3, 128.7, 127.7, 127.4, 126.9, 126.0, 125.8, 122.7; HRMS (ESI) calcd for  $\text{C}_{22}\text{H}_{15}\text{BrNO}$  ( $\text{M}+\text{H}$ ) $^+$  388.0332, found 388.0341.

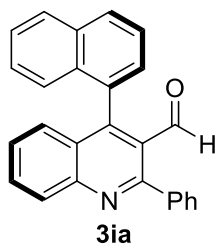

4-(Naphthalen-1-yl)-2-phenylquinoline-3-carbaldehyde **3ia** was obtained as a yellow solid in 92% yield (33.0 mg) and 92% ee (step 1, 30 °C, 60 h; step 2, rt, 24 h).  $R_f$  = 0.40 (petroleum ether/ethyl acetate 10:1). The ee value was determined by chiral stationary phase HPLC analysis [Daicel Chiralpak AD-H, isopropanol/hexane (20:80), 1.0 mL/min,  $\lambda$  = 254 nm,  $t_r$  (major) = 6.88 min,  $t_r$  (minor) = 8.25 min]. m.p. 84-85 °C;  $[\alpha]_D^{25}$  = +44.75 ( $c$  = 1.2, EtOAc);  $^1\text{H}$  NMR (400 MHz,  $\text{CDCl}_3$ ):  $\delta$  9.92 (s, 1H), 8.29 (d,  $J$  = 8.4 Hz, 1H), 8.03 (d,  $J$  = 8.4 Hz, 1H), 7.97 (d,  $J$  = 8.4 Hz, 1H), 7.85-7.77 (m, 1H), 7.73-7.67 (m, 2H), 7.66-7.58 (m, 1H), 7.56-7.47 (m, 4H), 7.44 (dd,  $J$  = 7.2, 1.2 Hz, 1H), 7.40-7.30 (m, 3H), 7.26-7.21 (m, 1H);  $^{13}\text{C}$  NMR (100 MHz,  $\text{CDCl}_3$ ):  $\delta$  192.0, 159.2, 151.0, 148.5, 139.4, 133.3, 132.4, 132.1, 132.1, 129.8, 129.8, 129.1, 129.0, 128.5, 128.5, 127.7, 127.4, 127.4, 127.4, 126.9, 126.9, 126.4, 125.5, 125.1; HRMS (ESI) calcd for  $\text{C}_{26}\text{H}_{18}\text{NO}$  ( $\text{M}+\text{H}$ ) $^+$  360.1383, found 360.1389.

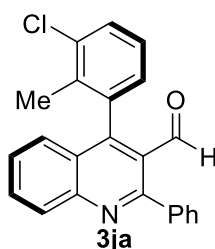

4-(3-Chloro-2-methylphenyl)-2-phenylquinoline-3-carbaldehyde **3ja** was obtained as a yellow solid in 89% yield (31.8 mg) and 93% ee (step 1, 30 °C, 60 h; step 2, rt, 24 h).  $R_f$  = 0.40 (petroleum ether/ethyl acetate 10:1). The ee value was determined by chiral stationary phase HPLC analysis [Daicel Chiralpak IC, isopropanol/hexane (10:90), 1.0 mL/min,  $\lambda$  = 254 nm,  $t_r$  (major) = 6.41 min,  $t_r$  (minor) = 6.86 min]. m.p. 118-119 °C;  $[\alpha]_D^{25}$  = -7.13 ( $c$  = 1.0, EtOAc);  $^1\text{H}$  NMR (400 MHz,  $\text{CDCl}_3$ ):  $\delta$  10.01 (s, 1H), 8.26 (d,  $J$  = 8.4 Hz, 1H), 7.90-7.81 (m, 1H), 7.73-7.63 (m, 2H), 7.58-7.47 (m, 5H), 7.40 (d,  $J$  = 8.0 Hz, 1H), 7.26 (d,  $J$  = 7.2 Hz, 1H), 7.05 (d,  $J$  = 7.6 Hz, 1H), 2.05 (s, 3H);  $^{13}\text{C}$  NMR (100 MHz,  $\text{CDCl}_3$ ):  $\delta$  191.8, 159.6, 150.4, 148.7, 139.0, 136.8, 135.3, 134.6, 132.2, 130.0, 129.9, 129.6, 129.3, 128.7, 127.7, 127.5, 127.0, 126.7, 126.2, 126.0, 17.6; HRMS (ESI) calcd for  $\text{C}_{23}\text{H}_{17}\text{ClNO}$  ( $\text{M}+\text{H}$ ) $^+$  358.0993, found 358.0996.

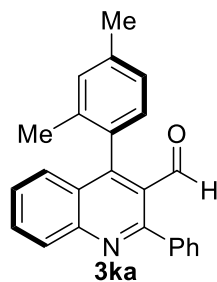

4-(2,4-Dimethylphenyl)-2-phenylquinoline-3-carbaldehyde **3ka** was obtained as a yellowish oil in 91% yield (30.7 mg) and 92% ee (step 1, 30 °C, 72 h; step 2, rt, 24 h).  $R_f$  = 0.40 (petroleum ether/ethyl acetate 10:1). The ee value was determined by chiral stationary phase HPLC analysis [Daicel Chiralpak IC, isopropanol/hexane (10:90), 1.0 mL/min,  $\lambda$  = 254 nm,  $t_r$  (major) = 7.17 min,  $t_r$  (minor) = 7.81 min].  $[\alpha]_D^{25}$  = -8.33 ( $c$  = 1.0, EtOAc);  $^1\text{H}$  NMR (400 MHz,  $\text{CDCl}_3$ ):  $\delta$  10.01 (s, 1H), 8.27 (d,  $J$  = 8.4 Hz, 1H), 7.87-7.80 (m, 1H), 7.70-7.63 (m, 2H), 7.57-7.43 (m, 5H), 7.21 (s, 1H), 7.16 (d,  $J$  = 8.4 Hz, 1H), 7.05 (d,  $J$  = 8.0 Hz, 1H), 2.45 (s, 3H), 1.98 (s, 3H);  $^{13}\text{C}$  NMR (100 MHz,  $\text{CDCl}_3$ ):  $\delta$  192.3, 159.2, 152.4, 148.4, 139.3, 138.6, 136.0, 132.1, 131.4, 130.9, 129.8, 129.7, 129.1, 129.0, 128.5, 127.4, 127.1, 126.6, 126.5, 126.4, 21.3, 19.9; HRMS (ESI) calcd for  $\text{C}_{24}\text{H}_{20}\text{NO}$  ( $\text{M}+\text{H}$ ) $^+$  338.1539, found 338.1545.

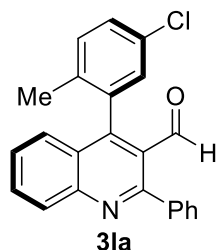

4-(5-Chloro-2-methylphenyl)-2-phenylquinoline-3-carbaldehyde **3la** was obtained (step 1, 30 °C, 60 h; step 2, rt, 48 h) as a yellow solid in 90% yield (30.7 mg) and 91% ee.  $R_f$  = 0.40 (petroleum ether/ethyl acetate 10:1). The ee value was determined by chiral stationary phase HPLC analysis [Daicel Chiralpak IC, isopropanol/hexane (10:90), 1.0 mL/min,  $\lambda$  = 254 nm,  $t_r$  (major) = 6.58 min,  $t_r$  (minor) = 6.94 min]. m.p. 99-100 °C;  $[\alpha]_D^{25}$  = -9.40 ( $c$  = 1.0, EtOAc);  $^1\text{H}$  NMR (400 MHz,  $\text{CDCl}_3$ ):  $\delta$  10.02 (s, 1H), 8.28 (d,  $J$  = 8.8 Hz, 1H), 7.90-7.81 (m, 1H), 7.72-7.63 (m, 2H), 7.58-7.48 (m, 4H), 7.45-7.37 (m, 2H), 7.32 (d,  $J$  = 8.4 Hz, 1H), 7.14 (d,  $J$  = 2.0 Hz, 1H), 1.98 (s, 3H);  $^{13}\text{C}$  NMR (100 MHz,  $\text{CDCl}_3$ ):  $\delta$  191.8, 159.6, 149.7, 148.7, 138.8, 136.7, 135.0, 132.3, 131.6, 131.4, 130.0, 129.9, 129.4, 128.7, 128.7, 128.6, 127.8, 126.9, 126.2, 125.9, 19.4; HRMS (ESI) calcd for  $\text{C}_{23}\text{H}_{17}\text{ClNO}$  ( $\text{M}+\text{H}$ ) $^+$  358.0993, found 358.0999.



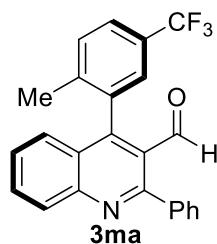

4-(2-Methyl-5-(trifluoromethyl)phenyl)-2-phenylquinoline-3-carbaldehyde **3ma** was obtained as a white solid in 92% yield (36.0 mg) and 93% ee (step 1, 30 °C, 60 h; step 2, rt, 72 h).  $R_f$  = 0.50 (petroleum ether/ethyl acetate 10:1). The ee value was determined by chiral stationary phase HPLC analysis [Daicel Chiralpak AD-H, isopropanol/hexane (08:92), 1.0 mL/min,  $\lambda$  = 254 nm,  $t_r$  (minor) = 5.34 min,  $t_r$  (major) = 5.76 min]. m.p. 123-124 °C;  $[\alpha]_D^{25}$  = -8.50 ( $c$  = 1.0, EtOAc);  $^1\text{H}$  NMR (400 MHz,  $\text{CDCl}_3$ ):  $\delta$  10.01 (s, 1H), 8.29 (d,  $J$  = 8.4 Hz, 1H), 7.90-7.83 (m, 1H), 7.74-7.65 (m, 3H), 7.60-7.47 (m, 5H), 7.39 (s, 1H), 7.35 (d,  $J$  = 8.8 Hz, 1H), 2.08 (s, 3H);  $^{13}\text{C}$  NMR (100 MHz,  $\text{CDCl}_3$ ):  $\delta$  191.7, 159.8, 149.2, 148.8, 140.8, 138.7, 136.0, 132.3, 130.4, 130.1, 130.0, 129.4, 128.7, 128.4 (q,  $J$  = 32.5 Hz), 127.9, 126.7, 126.2, 125.9, 125.4 (q,  $J$  = 3.7 Hz), 124.1 (q,  $J$  = 270.4 Hz), 20.0;  $^{19}\text{F}$  NMR (376 MHz,  $\text{CDCl}_3$ )  $\delta$  -62.13; HRMS (ESI) calcd for  $\text{C}_{24}\text{H}_{17}\text{F}_3\text{NO}$  ( $\text{M}+\text{H}$ ) $^+$  392.1257, found 392.1263.

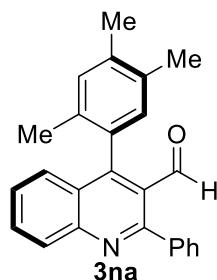

2-Phenyl-4-(2,4,5-trimethylphenyl)quinoline-3-carbaldehyde **3na** was obtained as a yellowish oil in 91% yield (32.0 mg) and 93% ee (step 1, 30 °C, 72 h; step 2, rt, 24 h).  $R_f$  = 0.40 (petroleum ether/ethyl acetate 10:1). The ee value was determined by chiral stationary phase HPLC analysis [Daicel Chiralpak IC, isopropanol/hexane (10:90), 1.0 mL/min,  $\lambda$  = 254 nm,  $t_r$  (major) = 6.90 min,  $t_r$  (minor) = 7.64 min].  $[\alpha]_D^{25}$  = -61.35 ( $c$  = 1.0, EtOAc);  $^1\text{H}$  NMR (400 MHz,  $\text{CDCl}_3$ ):  $\delta$  10.01 (s, 1H), 8.25 (d,  $J$  = 8.4 Hz, 1H), 7.86-7.79 (m, 1H), 7.69-7.61 (m, 2H), 7.55-7.44 (m, 5H), 7.15 (s, 1H), 6.93 (s, 1H), 2.35 (s, 3H), 2.27 (s, 3H), 1.95 (s, 3H);  $^{13}\text{C}$  NMR (100 MHz,  $\text{CDCl}_3$ ):  $\delta$  192.4, 159.1, 152.7, 148.5, 139.5, 137.2, 133.9, 133.4, 132.0, 131.5, 131.4, 130.3, 129.7, 128.9, 128.4, 127.3, 127.2, 126.6, 126.4, 19.6, 19.4, 19.3; HRMS (ESI) calcd for  $\text{C}_{25}\text{H}_{22}\text{NO}$  ( $\text{M}+\text{H}$ ) $^+$  352.1696, found 352.1698.

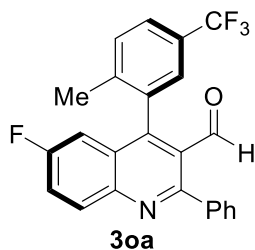

6-Fluoro-4-(2-methyl-5-(trifluoromethyl)phenyl)-2-phenylquinoline-3-carbaldehyde **3oa** was obtained as a white solid in 80% yield (32.7 mg) and 91% ee (step 1, 30 °C, 72 h; step 2, rt, 72 h).  $R_f$  = 0.50 (petroleum ether/ethyl acetate 10:1). The ee value was determined by chiral stationary phase HPLC analysis [Daicel Chiralpak IC, isopropanol/hexane (05:95), 1.0 mL/min,  $\lambda$  = 254 nm,  $t_r$  (major) = 4.94 min,  $t_r$  (minor) = 5.17 min]. m.p. 131-132 °C;  $[\alpha]_D^{25}$  = -11.13 ( $c$  = 1.0, EtOAc);  $^1\text{H}$  NMR (400 MHz,  $\text{CDCl}_3$ ):  $\delta$  10.01 (s, 1H), 8.30 (dd,  $J$  = 9.2, 5.2 Hz, 1H), 7.74-7.67 (m, 3H), 7.66-7.60 (m, 1H), 7.59-7.47 (m, 4H), 7.37 (s, 1H), 6.93 (dd,  $J$  = 9.6, 2.8 Hz, 1H), 2.09 (s, 3H);  $^{13}\text{C}$  NMR (100 MHz,  $\text{CDCl}_3$ ):  $\delta$  191.5, 161.2 (d,  $^1J_{\text{C-F}}$  = 249.2 Hz), 159.1 (d,  $^4J_{\text{C-F}}$  = 2.7 Hz), 148.4 (d,  $^3J_{\text{C-F}}$  = 5.9 Hz), 145.9, 140.7, 138.3, 135.5, 132.6 (d,  $^3J_{\text{C-F}}$  = 9.1 Hz), 130.6, 130.1, 129.8, 129.6, 128.8, 128.6 (q,  $J$  = 32.6 Hz), 127.9, 126.9 (d,  $^3J_{\text{C-F}}$  = 9.4 Hz), 126.8, 125.7 (q,  $J$  = 3.6 Hz), 125.3 (q,  $J$  = 3.6 Hz), 124.0 (q,  $J$  = 270.5 Hz), 122.6 (d,  $^2J_{\text{C-F}}$  = 25.9 Hz), 109.9 (d,  $^2J_{\text{C-F}}$  = 23.0 Hz), 20.0;  $^{19}\text{F}$  NMR (376 MHz,  $\text{CDCl}_3$ )  $\delta$  -62.18, -109.35; HRMS (ESI) calcd for  $\text{C}_{24}\text{H}_{16}\text{F}_4\text{NO}$  ( $\text{M}+\text{H}$ ) $^+$  410.1163, found 410.1173.

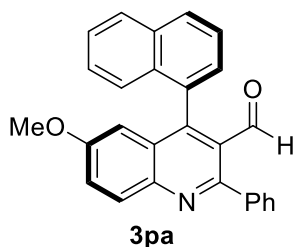

6-Methoxy-4-(naphthalen-1-yl)-2-phenylquinoline-3-carbaldehyde **3pa** was obtained as a yellow solid in 86% yield (33.3 mg) and 89% ee (step 1, 30 °C, 72 h; step 2, rt, 24 h).  $R_f$  = 0.30 (petroleum ether/ethyl acetate 10:1). The ee value was determined by chiral stationary phase HPLC analysis [Daicel Chiralpak AD-H, isopropanol/hexane (20:80), 1.0 mL/min,  $\lambda$  = 254 nm,  $t_r$  (major) = 7.68 min,  $t_r$  (minor) = 9.19 min]. m.p. 113-114 °C;  $[\alpha]_D^{25}$  = -19.00 ( $c$  = 1.0, EtOAc);  $^1\text{H}$  NMR (400 MHz,  $\text{CDCl}_3$ ):  $\delta$  9.90 (s, 1H), 8.20 (d,  $J$  = 9.2 Hz, 1H), 8.02 (d,  $J$  = 8.4 Hz, 1H), 7.97 (d,  $J$  = 8.0 Hz, 1H), 7.71-7.60 (m, 3H), 7.52-7.41 (m, 6H), 7.39-7.31 (m, 1H), 7.30-7.22 (m, 1H), 6.54 (d,  $J$  = 2.8 Hz, 1H), 3.50 (s, 3H);  $^{13}\text{C}$  NMR (100 MHz,  $\text{CDCl}_3$ ):  $\delta$  192.3, 158.4, 156.8, 149.1, 144.8, 139.4, 133.3, 132.7, 131.9, 131.2, 129.8, 129.1, 128.8, 128.5, 128.4, 128.0, 127.6, 127.6, 126.9, 126.3, 125.4, 125.2, 124.6, 104.9, 55.3; HRMS (ESI)

calcd for  $C_{27}H_{20}NO_2$  (M+H)<sup>+</sup> 390.1489, found 390.1496.

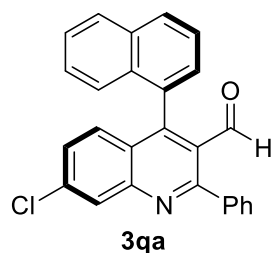

7-Chloro-4-(naphthalen-1-yl)-2-phenylquinoline-3-carbaldehyde **3qa** was obtained as a yellow solid in 90% yield (35.4 mg) and 92% ee (step 1, 30 °C, 60 h; step 2, rt, 36 h).  $R_f$  = 0.40 (petroleum ether/ethyl acetate 10:1). The ee value was determined by chiral stationary phase HPLC analysis [Daicel Chiralpak AD-H, isopropanol/hexane (10:90), 1.0 mL/min,  $\lambda$  = 254 nm,  $t_r$  (major) = 7.51 min,  $t_r$  (minor) = 8.69 min]. m.p. 116-117 °C;  $[\alpha]_D^{25}$  = +11.47 ( $c$  = 1.0, EtOAc);  $^1H$  NMR (400 MHz,  $CDCl_3$ ):  $\delta$  9.90 (s, 1H), 8.28 (d,  $J$  = 2.0 Hz, 1H), 8.03 (d,  $J$  = 8.4 Hz, 1H), 7.97 (d,  $J$  = 8.4 Hz, 1H), 7.72-7.66 (m, 2H), 7.62 (t,  $J$  = 8.0 Hz, 1H), 7.56-7.47 (m, 4H), 7.42 (d,  $J$  = 6.8 Hz, 1H), 7.38-7.29 (m, 2H), 7.28-7.23 (m, 1H), 7.20 (d,  $J$  = 8.4 Hz, 1H);  $^{13}C$  NMR (100 MHz,  $CDCl_3$ ):  $\delta$  191.7, 160.4, 150.9, 149.0, 139.0, 138.4, 133.4, 132.0, 131.9, 129.9, 129.4, 129.4, 128.8, 128.8, 128.7, 128.6, 128.6, 127.7, 127.6, 127.2, 126.5, 125.4, 125.3, 125.2; HRMS (ESI) calcd for  $C_{26}H_{17}ClNO$  (M+H)<sup>+</sup> 394.0993, found 394.0994.

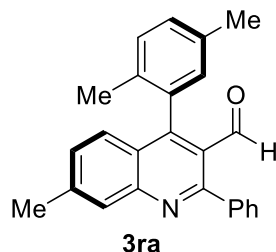

4-(2,5-Dimethylphenyl)-7-methyl-2-phenylquinoline-3-carbaldehyde **3ra** was obtained as a yellow solid in 93% yield (32.8 mg) and 94% ee (step 1, 30 °C, 72 h; step 2, rt, 24 h).  $R_f$  = 0.40 (petroleum ether/ethyl acetate 10:1). The ee value was determined by chiral stationary phase HPLC analysis [Daicel Chiralpak AD-H, isopropanol/hexane (10:90), 1.0 mL/min,  $\lambda$  = 254 nm,  $t_r$  (minor) = 5.37 min,  $t_r$  (major) = 6.68 min]. m.p. 171-172 °C;  $[\alpha]_D^{25}$  = +6.80 ( $c$  = 1.0, EtOAc);  $^1H$  NMR (400 MHz,  $CDCl_3$ ):  $\delta$  9.99 (s, 1H), 8.03 (s, 1H), 7.68-7.61 (m, 2H), 7.54-7.45 (m, 3H), 7.37-7.29 (m, 2H), 7.27-7.20 (m, 2H), 6.97 (s, 1H), 2.58 (s, 3H), 2.36 (s, 3H), 1.97 (s, 3H);  $^{13}C$  NMR (100 MHz,  $CDCl_3$ ):  $\delta$  192.3, 159.5, 152.3, 148.9, 143.0, 139.7, 135.3, 134.5, 133.1, 130.0, 129.8, 129.7, 129.7, 129.5, 128.9, 128.4, 126.9, 125.7, 124.3, 22.0, 21.0, 19.5; HRMS (ESI) calcd for  $C_{25}H_{22}NO$  (M+H)<sup>+</sup> 352.1696, found 352.1703.

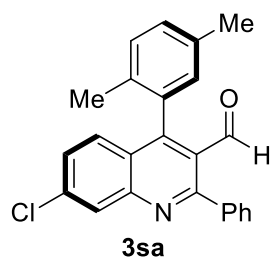

7-Chloro-4-(2,5-dimethylphenyl)-2-phenylquinoline-3-carbaldehyde **3sa** was obtained as a yellow solid in 89% yield (33.0 mg) and 95% ee (step 1, 30 °C, 60 h; step 2, rt, 36 h).  $R_f$  = 0.40 (petroleum ether/ethyl acetate 10:1). The ee value was determined by chiral stationary phase HPLC analysis [Daicel Chiralpak AD-H, isopropanol/hexane (10:90), 1.0 mL/min,  $\lambda$  = 254 nm,  $t_r$  (minor) = 5.34 min,  $t_r$  (major) = 6.18 min]. m.p. 171-172 °C;  $[\alpha]_D^{25}$  = +10.75 ( $c$  = 1.0, EtOAc);  $^1\text{H}$  NMR (400 MHz,  $\text{CDCl}_3$ ):  $\delta$  9.99 (s, 1H), 8.24 (d,  $J$  = 2.0 Hz, 1H), 7.69-7.59 (m, 2H), 7.57-7.47 (m, 3H), 7.46-7.34 (m, 2H), 7.30-7.20 (m, 2H), 6.95 (s, 1H), 2.37 (s, 3H), 1.96 (s, 3H);  $^{13}\text{C}$  NMR (100 MHz,  $\text{CDCl}_3$ ):  $\delta$  191.9, 160.4, 152.2, 148.9, 139.0, 138.2, 135.4, 133.8, 133.0, 130.1, 129.8, 129.5, 129.3, 128.7, 128.5, 128.5, 128.4, 126.5, 124.7, 21.0, 19.4; HRMS (ESI) calcd for  $\text{C}_{24}\text{H}_{19}\text{ClNO}$  ( $\text{M}+\text{H}$ ) $^+$  372.1150, found 372.1157.

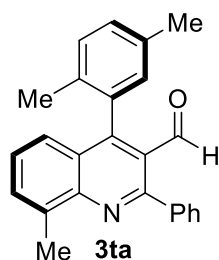

4-(2,5-Dimethylphenyl)-8-methyl-2-phenylquinoline-3-carbaldehyde **3ta** was obtained as a yellowish oil in 54% yield (19.0 mg) and 95% ee (step 1, 30 °C, 96 h; step 2, rt, 72 h).  $R_f$  = 0.60 (petroleum ether/ethyl acetate 10:1). The ee value was determined by chiral stationary phase HPLC analysis [Daicel Chiralpak IC, isopropanol/hexane (05:95), 1.0 mL/min,  $\lambda$  = 254 nm,  $t_r$  (major) = 5.16 min,  $t_r$  (minor) = 5.41 min].  $[\alpha]_D^{25}$  = -9.71 ( $c$  = 1.0, EtOAc);  $^1\text{H}$  NMR (400 MHz,  $\text{CDCl}_3$ ):  $\delta$  10.04 (d,  $J$  = 2.0 Hz, 1H), 7.75-7.70 (m, 2H), 7.67 (d,  $J$  = 6.8 Hz, 1H), 7.54-7.47 (m, 3H), 7.39-7.33 (m, 1H), 7.29-7.20 (m, 3H), 6.96 (s, 1H), 2.89 (s, 3H), 2.37 (s, 3H), 1.96 (s, 3H);  $^{13}\text{C}$  NMR (100 MHz,  $\text{CDCl}_3$ ):  $\delta$  192.8, 157.5, 152.3, 147.6, 139.9, 137.9, 135.2, 134.8, 133.1, 132.0, 130.3, 129.9, 129.7, 129.4, 128.9, 128.9, 128.3, 127.2, 127.0, 126.1, 126.0, 125.0, 21.0, 19.5, 18.1; HRMS (ESI) calcd for  $\text{C}_{25}\text{H}_{22}\text{NO}$  ( $\text{M}+\text{H}$ ) $^+$  352.1696, found 352.1706.

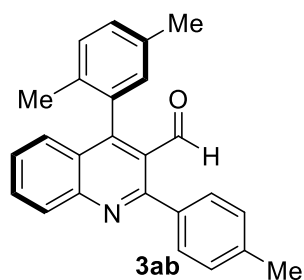

3-(2,5-Dimethylphenyl)-2-*p*-tolylquinoline-3-carbaldehyde **3ab** was obtained as a yellow solid in 90% yield (31.6 mg) and 94% ee (step 1, 30 °C, 60 h; step 2, rt, 24 h).  $R_f = 0.40$  (petroleum ether/ethyl acetate 10:1). The ee value was determined by chiral stationary phase HPLC analysis [Daicel Chiralpak AD-H, isopropanol/hexane (10:90), 1.0 mL/min,  $\lambda = 254$  nm,  $t_r$  (minor) = 5.77 min,  $t_r$  (major) = 8.89 min]. m.p. 106-107 °C;  $[\alpha]_D^{25} = -17.67$  ( $c = 1.0$ , EtOAc);  $^1\text{H}$  NMR (400 MHz,  $\text{CDCl}_3$ ):  $\delta$  10.02 (s, 1H), 8.24 (d,  $J = 8.4$  Hz, 1H), 7.85-7.76 (m, 1H), 7.56 (d,  $J = 8.0$  Hz, 2H), 7.50-7.41 (m, 2H), 7.32 (d,  $J = 8.0$  Hz, 2H), 7.28-7.16 (m, 2H), 6.96 (s, 1H), 2.44 (s, 3H), 2.36 (s, 3H), 1.97 (s, 3H);  $^{13}\text{C}$  NMR (100 MHz,  $\text{CDCl}_3$ ):  $\delta$  192.4, 159.2, 152.2, 148.6, 139.1, 136.5, 135.3, 134.4, 133.1, 132.0, 130.0, 129.8, 129.7, 129.7, 129.5, 129.3, 127.3, 127.1, 126.5, 126.2, 21.4, 21.0, 19.5; HRMS (ESI) calcd for  $\text{C}_{25}\text{H}_{22}\text{NO}$  ( $\text{M}+\text{H}$ ) $^+$  352.1696, found 352.1702.

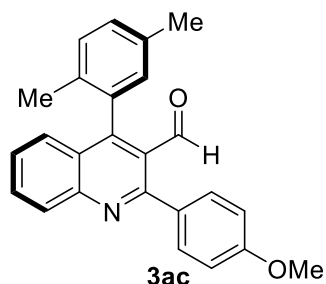

4-(2,5-Dimethylphenyl)-2-(4-methoxyphenyl)quinoline-3-carbaldehyde **3ac** was obtained as a yellow solid in 89% yield (32.7 mg) and 92% ee (step 1, 30 °C, 72 h; step 2, rt, 24 h).  $R_f = 0.30$  (petroleum ether/ethyl acetate 10:1). The ee value was determined by chiral stationary phase HPLC analysis [Daicel Chiralpak AD-H, isopropanol/hexane (10:90), 1.0 mL/min,  $\lambda = 254$  nm,  $t_r$  (minor) = 8.61 min,  $t_r$  (major) = 13.89 min]. m.p. 150-151 °C;  $[\alpha]_D^{25} = -21.56$  ( $c = 1.0$ , EtOAc);  $^1\text{H}$  NMR (400 MHz,  $\text{CDCl}_3$ ):  $\delta$  10.02 (s, 1H), 8.23 (d,  $J = 8.4$  Hz, 1H), 7.85-7.76 (m, 1H), 7.68-7.59 (m, 2H), 7.50-7.39 (m, 2H), 7.30-7.19 (m, 2H), 7.09-7.01 (m, 2H), 6.96 (s, 1H), 3.88 (s, 3H), 2.37 (s, 3H), 1.96 (s, 3H);  $^{13}\text{C}$  NMR (100 MHz,  $\text{CDCl}_3$ ):  $\delta$  192.4, 160.5, 158.7, 152.1, 148.6, 135.2, 134.4, 133.1, 131.9, 131.7, 131.4, 129.9, 129.6, 129.5, 127.1, 127.1, 126.4, 126.0, 114.0, 55.4, 21.0, 19.5; HRMS (ESI) calcd for  $\text{C}_{25}\text{H}_{22}\text{NO}_2$  ( $\text{M}+\text{H}$ ) $^+$  368.1645, found 368.1651.

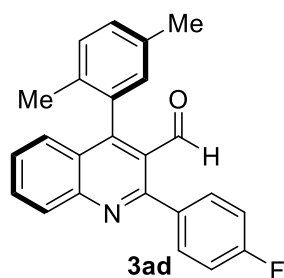

4-(2,5-Dimethylphenyl)-2-(4-fluorophenyl)quinoline-3-carbaldehyde **3ad** was obtained as a white solid in 91% yield (32.3 mg) and 92% ee (step 1, 30 °C, 72 h; step 2, rt, 48 h).  $R_f$  = 0.40 (petroleum ether/ethyl acetate 10:1). The ee value was determined by chiral stationary phase HPLC analysis [Daicel Chiralpak AD-H, isopropanol/hexane (10:90), 1.0 mL/min,  $\lambda$  = 254 nm,  $t_r$  (minor) = 6.58 min,  $t_r$  (major) = 9.18 min]. m.p. 127-128 °C;  $[\alpha]_D^{25}$  = -11.22 ( $c$  = 1.0, EtOAc);  $^1\text{H}$  NMR (400 MHz,  $\text{CDCl}_3$ ):  $\delta$  10.00 (s, 1H), 8.22 (d,  $J$  = 8.4 Hz, 1H), 7.88-7.78 (m, 1H), 7.69-7.59 (m, 2H), 7.54-7.41 (m, 2H), 7.30-7.26 (m, 1H), 7.25-7.14 (m, 3H), 6.99 (s, 1H), 2.38 (s, 3H), 1.97 (s, 3H);  $^{13}\text{C}$  NMR (100 MHz,  $\text{CDCl}_3$ ):  $\delta$  192.2, 163.3 (d,  $^1J_{\text{C-F}}$  = 247.2 Hz), 157.9, 153.2, 148.5, 135.7 (d,  $^4J_{\text{C-F}}$  = 3.3 Hz), 135.4, 133.9, 133.1, 132.3, 131.6 (d,  $^3J_{\text{C-F}}$  = 8.4 Hz), 130.1, 129.8, 129.7, 127.6, 127.1, 126.2, 126.1, 115.5 (d,  $^2J_{\text{C-F}}$  = 21.7 Hz), 21.0, 19.5;  $^{19}\text{F}$  NMR (376 MHz,  $\text{CDCl}_3$ )  $\delta$  -112.22; HRMS (ESI) calcd for  $\text{C}_{24}\text{H}_{19}\text{FNO}$  ( $\text{M}+\text{H}$ ) $^+$  356.1445, found 356.1448.

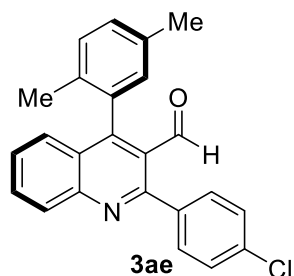

2-(4-Chlorophenyl)-4-(2,5-dimethylphenyl)quinoline-3-carbaldehyde **3ae** was obtained as a yellowish oil in 87% yield (32.3 mg) and 93% ee (step 1, 30 °C, 72 h; step 2, rt, 24 h).  $R_f$  = 0.40 (petroleum ether/ethyl acetate 10:1). The ee value was determined by chiral stationary phase HPLC analysis [Daicel Chiralpak AD-H, isopropanol/hexane (10:90), 1.0 mL/min,  $\lambda$  = 254 nm,  $t_r$  (minor) = 7.17 min,  $t_r$  (major) = 10.50 min].  $[\alpha]_D^{25}$  = -20.90 ( $c$  = 1.0, EtOAc);  $^1\text{H}$  NMR (400 MHz,  $\text{CDCl}_3$ ):  $\delta$  9.99 (s, 1H), 8.23 (d,  $J$  = 8.4 Hz, 1H), 7.89-7.79 (m, 1H), 7.59 (d,  $J$  = 8.8 Hz, 2H), 7.54-7.41 (m, 4H), 7.32-7.22 (m, 2H), 6.99 (s, 1H), 2.38 (s, 3H), 1.97 (s, 3H);  $^{13}\text{C}$  NMR (100 MHz,  $\text{CDCl}_3$ ):  $\delta$  192.1, 157.7, 153.4, 148.5, 138.1, 135.4, 135.1, 133.7, 133.1, 132.3, 131.0, 130.1, 129.8, 129.8, 129.8, 128.6, 127.7, 127.0, 126.2, 126.1, 21.0, 19.5; HRMS (ESI) calcd for  $\text{C}_{24}\text{H}_{19}\text{ClNO}$  ( $\text{M}+\text{H}$ ) $^+$  372.1150, found 372.1155.

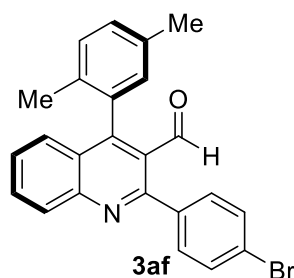

2-(4-Bromophenyl)-4-(2,5-dimethylphenyl)quinoline-3-carbaldehyde **3af** was obtained as a yellowish oil in 85% yield (35.3 mg) and 94% ee (step 1, 30 °C, 72 h; step 2, rt, 48 h).  $R_f$  = 0.40 (petroleum ether/ethyl acetate 10:1). The ee value was determined by chiral stationary phase HPLC analysis [Daicel Chiralpak AD-H, isopropanol/hexane (10:90), 1.0 mL/min,  $\lambda$  = 254 nm,  $t_r$  (minor) = 7.12 min,  $t_r$  (major) = 10.49 min].  $[\alpha]_D^{25}$  = -23.15 ( $c$  = 1.0, EtOAc);  $^1\text{H}$  NMR (400 MHz,  $\text{CDCl}_3$ ):  $\delta$  9.99 (s, 1H), 8.22 (d,  $J$  = 8.4 Hz, 1H), 7.90-7.77 (m, 1H), 7.63 (d,  $J$  = 8.4 Hz, 2H), 7.56-7.40 (m, 4H), 7.31-7.21 (m, 2H), 6.99 (s, 1H), 2.38 (s, 3H), 1.97 (s, 3H);  $^{13}\text{C}$  NMR (100 MHz,  $\text{CDCl}_3$ ):  $\delta$  192.1, 157.7, 153.5, 148.6, 138.7, 135.5, 133.7, 133.1, 132.3, 131.6, 131.3, 130.1, 129.9, 129.9, 129.8, 127.7, 127.0, 126.2, 126.1, 123.5, 21.0, 19.5; HRMS (ESI) calcd for  $\text{C}_{24}\text{H}_{19}\text{BrNO}$  ( $\text{M}+\text{H}$ ) $^+$  416.0645, found 416.0651.

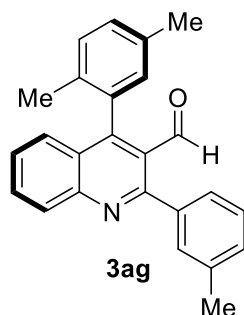

4-(2,5-Dimethylphenyl)-2-(*m*-tolyl)quinoline-3-carbaldehyde **3ag** was obtained as a yellowish oil in 93% yield (32.6 mg) and 93% ee (step 1, 30 °C, 72 h; step 2, rt, 24 h).  $R_f$  = 0.40 (petroleum ether/ethyl acetate 10:1). The ee value was determined by chiral stationary phase HPLC analysis [Daicel Chiralpak AD-H, isopropanol/hexane (10:90), 1.0 mL/min,  $\lambda$  = 254 nm,  $t_r$  (minor) = 5.26 min,  $t_r$  (major) = 6.52 min].  $[\alpha]_D^{25}$  = -12.60 ( $c$  = 1.0, EtOAc);  $^1\text{H}$  NMR (400 MHz,  $\text{CDCl}_3$ ):  $\delta$  10.01 (s, 1H), 8.25 (d,  $J$  = 8.4 Hz, 1H), 7.87-7.78 (m, 1H), 7.55-7.43 (m, 3H), 7.42-7.35 (m, 2H), 7.32-7.20 (m, 3H), 6.97 (s, 1H), 2.46 (s, 3H), 2.37 (s, 3H), 1.97 (s, 3H);  $^{13}\text{C}$  NMR (100 MHz,  $\text{CDCl}_3$ ):  $\delta$  192.3, 159.5, 152.2, 148.5, 139.3, 138.3, 135.3, 134.4, 133.1, 132.0, 130.3, 130.0, 129.9, 129.8, 129.6, 129.5, 128.3, 127.4, 127.2, 127.1, 126.5, 126.2, 21.6, 21.0, 19.5; HRMS (ESI) calcd for  $\text{C}_{25}\text{H}_{22}\text{NO}$  ( $\text{M}+\text{H}$ ) $^+$  352.1696, found 352.1707.

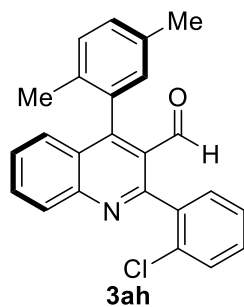

2-(2-Chlorophenyl)-4-(2,5-dimethylphenyl)quinoline-3-carbaldehyde **3ah** was obtained as a yellowish oil as a mixture of rotamers in a 1.4:1 ratio in 90% yield (33.5 mg) and 97% ee (step 1, 30 °C, 60 h; step 2, rt, 24 h).  $R_f$  = 0.40 (petroleum ether/ethyl acetate 10:1). The ee value was determined by chiral stationary phase HPLC analysis [Daicel Chiralpak AD-H, isopropanol/hexane (10:90), 1.0 mL/min,  $\lambda$  = 254 nm,  $t_r$  (minor) = 6.17 min,  $t_r$  (major) = 8.49 min].  $[\alpha]_D^{25}$  = -35.60 ( $c$  = 1.0, EtOAc);  $^1\text{H}$  NMR (400 MHz,  $\text{CDCl}_3$ ):  $\delta$  9.94-9.85 (1H; minor rotamer: 9.91, major rotamer: 9.87), 8.25 (d,  $J$  = 8.4 Hz, 1H), 7.89-7.81 (m, 1H), 7.65-7.57 (m, 1H), 7.57-7.48 (m, 2H), 7.47-7.38 (m, 3H), 7.31-7.24 (m, 2H), 7.15-6.94 (1H; minor rotamer: 7.13, major rotamer: 6.98), 2.44-2.33 (3H; minor rotamer: 2.41, major rotamer: 2.37), 2.09-1.87 (3H; major rotamer: 2.06, minor rotamer: 1.91);  $^{13}\text{C}$  NMR (100 MHz,  $\text{CDCl}_3$ ):  $\delta$  191.4, 156.2, 148.7, 139.4, 135.6, 133.2, 133.2, 132.3, 131.9, 130.4, 130.3, 130.3, 130.2, 129.9, 129.9, 129.3, 127.9, 127.3, 127.3, 126.9, 126.5, 126.3, 21.0, 19.5; HRMS (ESI) calcd for  $\text{C}_{24}\text{H}_{19}\text{ClNO}$  ( $\text{M}+\text{H}$ ) $^+$  372.1150, found 372.1158.

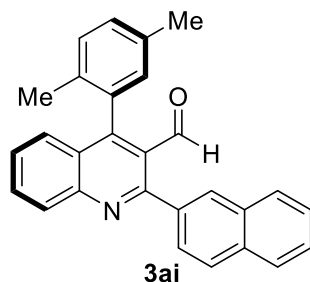

4-(2,5-Dimethylphenyl)-2-(naphthalen-2-yl)quinoline-3-carbaldehyde **3ai** was obtained as a yellowish oil in 95% yield (36.9 mg) and 93% ee (step 1, 30 °C, 60 h; step 2, rt, 24 h).  $R_f$  = 0.30 (petroleum ether/ethyl acetate 10:1). The ee value was determined by chiral stationary phase HPLC analysis [Daicel Chiralpak AD-H, isopropanol/hexane (10:90), 1.0 mL/min,  $\lambda$  = 254 nm,  $t_r$  (minor) = 8.39 min,  $t_r$  (major) = 13.31 min].  $[\alpha]_D^{25}$  = -27.00 ( $c$  = 1.0, EtOAc);  $^1\text{H}$  NMR (400 MHz,  $\text{CDCl}_3$ ):  $\delta$  10.05 (s, 1H), 8.28 (d,  $J$  = 8.4 Hz, 1H), 8.13 (s, 1H), 8.01-7.88 (m, 3H), 7.87-7.75 (m, 2H), 7.59-7.41 (m, 4H), 7.30-7.23 (m, 2H), 7.00 (s, 1H), 2.37 (s, 3H), 2.00 (s, 3H);  $^{13}\text{C}$  NMR (100 MHz,  $\text{CDCl}_3$ ):  $\delta$  192.2, 159.1, 152.5, 148.6, 136.9, 135.3, 134.2, 133.4, 133.1, 133.1, 132.1, 130.0, 129.8, 129.7, 129.6, 129.6, 128.6, 128.1, 127.8, 127.5,



127.1, 127.1, 126.8, 126.6, 126.4, 126.2, 21.0, 19.5; HRMS (ESI) calcd for  $C_{28}H_{22}NO$  ( $M+H$ )<sup>+</sup> 388.1696, found 388.1700.

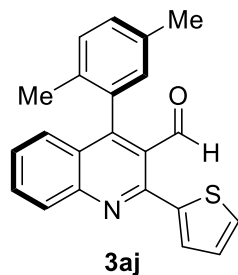

4-(2,5-Dimethylphenyl)-2-(thiophen-2-yl)quinoline-3-carbaldehyde **3aj** was obtained as a yellow solid in 92% yield (31.6 mg) and 93% ee (step 1, 30 °C, 72 h; step 2, rt, 24 h).  $R_f$  = 0.40 (petroleum ether/ethyl acetate 10:1). The ee value was determined by chiral stationary phase HPLC analysis [Daicel Chiralpak AD-H, isopropanol/hexane (10:90), 1.0 mL/min,  $\lambda$  = 254 nm,  $t_r$  (minor) = 5.90 min,  $t_r$  (major) = 7.99 min]. m.p. 46-47 °C;  $[\alpha]_D^{25}$  = -39.70 ( $c$  = 1.0, EtOAc);  $^1H$  NMR (400 MHz,  $CDCl_3$ ):  $\delta$  10.17 (s, 1H), 8.18 (d,  $J$  = 8.4 Hz, 1H), 7.83-7.74 (m, 1H), 7.59-7.52 (m, 1H), 7.48-7.42 (m, 1H), 7.41-7.34 (m, 2H), 7.28-7.20 (m, 2H), 7.18-7.11 (m, 1H), 6.94 (s, 1H), 2.36 (s, 3H), 1.95 (s, 3H);  $^{13}C$  NMR (100 MHz,  $CDCl_3$ ):  $\delta$  192.4, 151.4, 148.6, 142.5, 135.3, 134.3, 133.2, 131.9, 130.5, 130.0, 129.6, 129.6, 129.5, 129.4, 128.0, 127.4, 127.1, 126.5, 126.0, 21.0, 19.5; HRMS (ESI) calcd for  $C_{22}H_{18}NOS$  ( $M+H$ )<sup>+</sup> 344.1104, found 344.1113.

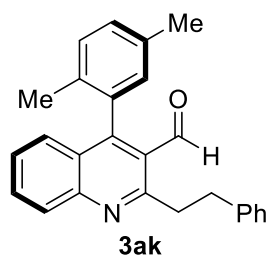

4-(2,5-Dimethylphenyl)-2-phenethylquinoline-3-carbaldehyde **3ak** was obtained as a yellowish oil in 85% yield (31.1 mg) and 97% ee (step 1, 30 °C, 60 h; step 2, rt, 24 h).  $R_f$  = 0.50 (petroleum ether/ethyl acetate 10:1). The ee value was determined by chiral stationary phase HPLC analysis [Daicel Chiralpak AD-H, isopropanol/hexane (10:90), 1.0 mL/min,  $\lambda$  = 254 nm,  $t_r$  (minor) = 5.35 min,  $t_r$  (major) = 6.20 min].  $[\alpha]_D^{25}$  = -8.86 ( $c$  = 1.0, EtOAc);  $^1H$  NMR (400 MHz,  $CDCl_3$ ):  $\delta$  9.91 (s, 1H), 8.15 (d,  $J$  = 8.4 Hz, 1H), 7.86-7.77 (m, 1H), 7.48-7.42 (m, 1H), 7.39 (dd,  $J$  = 8.4, 1.6 Hz, 3H), 7.33-7.24 (m, 4H), 7.24-7.17 (m, 1H), 6.99 (s, 1H), 3.74-3.61 (m, 2H), 3.21-3.05 (m, 2H), 2.37 (s, 3H), 1.92 (s, 3H);  $^{13}C$  NMR (100 MHz,  $CDCl_3$ ):  $\delta$  193.4, 160.7, 155.8, 148.7, 142.0, 135.6, 133.3, 133.2, 132.2, 130.5, 130.2, 129.9, 129.2, 128.8, 128.3, 126.9, 126.7, 125.9, 125.8, 125.3, 39.5, 35.7, 20.9, 19.5; HRMS (ESI)

calcd for  $C_{26}H_{24}NO$  ( $M+H$ )<sup>+</sup> 366.1852, found 366.1861.

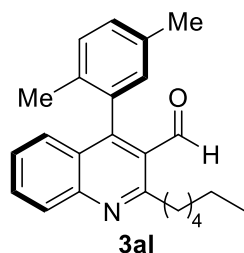

4-(2,5-Dimethylphenyl)-2-hexylquinoline-3-carbaldehyde **3al** was obtained as a yellowish oil in 91% yield (31.4 mg) and 98% ee (step 1, 30 °C, 72 h; step 2, rt, 48 h).  $R_f$  = 0.60 (petroleum ether/ethyl acetate 10:1). The ee value was determined by chiral stationary phase HPLC analysis [Daicel Chiralpak AD-H, isopropanol/hexane (05:95), 1.0 mL/min,  $\lambda$  = 254 nm,  $t_r$  (minor) = 4.48 min,  $t_r$  (major) = 5.53 min].  $[\alpha]_D^{25}$  = -17.64 ( $c$  = 1.0, EtOAc);  $^1H$  NMR (400 MHz,  $CDCl_3$ ):  $\delta$  9.96 (s, 1H), 8.12 (d,  $J$  = 8.4 Hz, 1H), 7.84-7.76 (m, 1H), 7.46-7.33 (m, 2H), 7.28-7.20 (m, 2H), 6.99 (s, 1H), 3.45-3.28 (m, 2H), 2.37 (s, 3H), 1.92 (s, 3H), 1.84-1.69 (m, 3H), 1.55-1.46 (m, 2H), 1.39-1.31 (m, 3H), 0.90 (t,  $J$  = 6.8 Hz, 3H);  $^{13}C$  NMR (100 MHz,  $CDCl_3$ ):  $\delta$  193.3, 162.1, 155.8, 148.5, 135.6, 133.4, 133.2, 132.2, 130.4, 130.2, 129.9, 129.0, 126.7, 126.6, 125.7, 125.1, 37.6, 31.8, 30.0, 29.6, 22.7, 20.9, 19.4, 14.1; HRMS (ESI) calcd for  $C_{24}H_{28}NO$  ( $M+H$ )<sup>+</sup> 346.2165, found 346.2168.

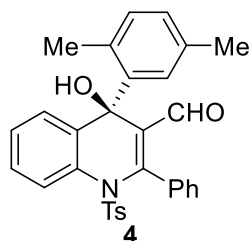

4-(2,5-Dimethylphenyl)-4-hydroxy-2-phenyl-1-tosyl-1,4-dihydroquinoline-3-carbaldehyde **4** was obtained as a yellowish oil in 90% yield (91.6 mg) and 93% ee.  $R_f$  = 0.20 (petroleum ether/ethyl acetate 10:1). The ee value was determined by chiral stationary phase HPLC analysis [Daicel Chiralpak IC, isopropanol/hexane (10:90), 1.0 mL/min,  $\lambda$  = 254 nm,  $t_r$  (major) = 6.39 min,  $t_r$  (minor) = 6.90 min].  $[\alpha]_D^{25}$  = -16.78 ( $c$  = 1.0, EtOAc);  $^1H$  NMR (400 MHz,  $CDCl_3$ ):  $\delta$  9.87 (s, 1H), 9.04 (d,  $J$  = 8.4 Hz, 1H), 8.16-8.08 (m, 1H), 7.80-7.72 (m, 3H), 7.65-7.56 (m, 2H), 7.56-7.52 (m, 2H), 7.49 (t,  $J$  = 8.0 Hz, 2H), 7.32 (s, 2H), 7.09 (d,  $J$  = 8.0 Hz, 2H), 6.97 (s, 1H), 2.39 (s, 3H), 2.35 (s, 3H), 1.99 (s, 3H);  $^{13}C$  NMR (100 MHz,  $CDCl_3$ ):  $\delta$  188.7, 159.9, 156.9, 142.1, 140.5, 139.8, 136.5, 136.0, 132.7, 131.9, 131.9, 130.9, 130.7, 130.5, 130.3, 129.0, 128.9, 128.6, 127.8, 127.4, 127.2, 125.9, 124.0, 21.3, 21.0, 19.5, 17.7; HRMS (ESI) calcd for  $C_{31}H_{28}NO_4S$  ( $M+H$ )<sup>+</sup> 510.1734, found 510.1740.

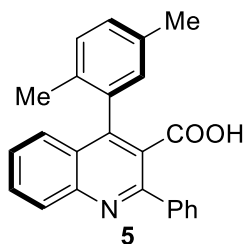

4-(2,5-Dimethylphenyl)-2-phenylquinoline-3-carboxylic acid **5** was obtained as a yellow solid in 83% yield (29.3 mg) and 93% ee.  $R_f = 0.20$  (petroleum ether/ethyl acetate 1:1). The ee value was determined by chiral stationary phase HPLC analysis [Daicel Chiralpak AD-H, isopropanol/hexane (05:95), 1.0 mL/min,  $\lambda = 254$  nm,  $t_r$  (minor) = 7.09 min,  $t_r$  (major) = 10.81 min]. m.p. 232-233 °C;  $[\alpha]_D^{25} = -68.85$  ( $c = 1.0$ , EtOAc);  $^1\text{H}$  NMR (400 MHz,  $\text{CDCl}_3$ ):  $\delta$  7.95 (d,  $J = 8.4$  Hz, 1H), 7.73-7.59 (m, 3H), 7.44 (t,  $J = 7.6$  Hz, 1H), 7.37-7.25 (m, 4H), 7.07 (s, 2H), 6.91 (s, 1H), 2.24 (s, 3H), 1.89 (s, 3H);  $^{13}\text{C}$  NMR (100 MHz,  $\text{CDCl}_3$ ):  $\delta$  155.8, 147.4, 146.8, 139.3, 134.8, 134.8, 133.6, 130.7, 129.9, 129.7, 129.3, 128.9, 128.9, 128.7, 128.3, 127.2, 126.3, 125.7, 20.9, 19.4; HRMS (ESI) calcd for  $\text{C}_{24}\text{H}_{20}\text{NO}_2$  ( $\text{M}+\text{H}$ ) $^+$  354.1489, found 354.1498.

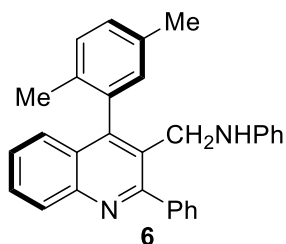

*N*-((4-(2,5-Dimethylphenyl)-2-phenylquinolin-3-yl)methyl)aniline **6** was obtained as a yellow solid in 69% yield (28.6 mg) and 93% ee.  $R_f = 0.30$  (petroleum ether/ethyl acetate 5:1). The ee value was determined by chiral stationary phase HPLC analysis [Daicel Chiralpak AD-H, isopropanol/hexane (10:90), 1.0 mL/min,  $\lambda = 254$  nm,  $t_r$  (minor) = 5.07 min,  $t_r$  (major) = 7.37 min]. m.p. 186-187 °C;  $[\alpha]_D^{25} = +4.45$  ( $c = 1.0$ , EtOAc);  $^1\text{H}$  NMR (400 MHz,  $\text{CDCl}_3$ ):  $\delta$  8.25 (d,  $J = 8.4$  Hz, 1H), 7.82-7.75 (m, 2H), 7.74-7.66 (m, 1H), 7.53-7.39 (m, 4H), 7.31 (d,  $J = 8.0$  Hz, 1H), 7.28-7.25 (m, 1H), 7.21-7.16 (m, 1H), 7.05 (s, 1H), 7.00 (t,  $J = 8.0$  Hz, 2H), 6.61 (t,  $J = 7.2$  Hz, 1H), 6.20 (d,  $J = 8.0$  Hz, 2H), 4.30 (d,  $J = 13.2$  Hz, 1H), 4.05 (d,  $J = 13.2$  Hz, 1H), 2.36 (s, 3H), 1.94 (s, 3H);  $^{13}\text{C}$  NMR (100 MHz,  $\text{CDCl}_3$ ):  $\delta$  160.5, 147.3, 135.6, 135.5, 132.9, 130.9, 130.4, 129.8, 129.5, 129.3, 128.9, 128.8, 128.7, 128.6, 128.1, 126.8, 126.7, 126.1, 117.7, 113.3, 43.6, 21.0, 19.4; HRMS (ESI) calcd for  $\text{C}_{30}\text{H}_{27}\text{N}_2$  ( $\text{M}+\text{H}$ ) $^+$  415.2169, found 415.2172.

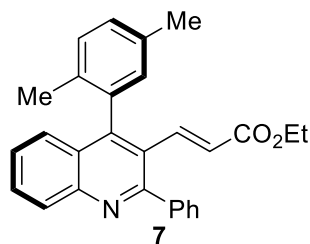

Ethyl (*E*)-3-(4-(2,5-dimethylphenyl)-2-phenylquinolin-3-yl)acrylate **7** was obtained as a yellow solid in 89% yield (36.2 mg) and 93% ee.  $R_f = 0.30$  (petroleum ether/ethyl acetate 10:1). The ee value was determined by chiral stationary phase HPLC analysis [Daicel Chiralpak IC, isopropanol/hexane (03:97), 1.0 mL/min,  $\lambda = 254$  nm,  $t_r$  (minor) = 11.56 min,  $t_r$  (major) = 12.31 min]. m.p. 102-103 °C;  $[\alpha]_D^{25} = -11.30$  ( $c = 1.0$ , EtOAc);  $^1\text{H}$  NMR (400 MHz,  $\text{CDCl}_3$ ):  $\delta$  8.20 (d,  $J = 8.4$  Hz, 1H), 7.76-7.69 (m, 1H), 7.68-7.61 (m, 2H), 7.53 (d,  $J = 16.4$  Hz, 1H), 7.51-7.39 (m, 4H), 7.35 (dd,  $J = 8.4, 1.6$  Hz, 1H), 7.26-7.17 (m, 2H), 6.96 (s, 1H), 5.38 (d,  $J = 16.4$  Hz, 1H), 4.04 (q,  $J = 7.2$  Hz, 2H), 2.37 (s, 3H), 1.90 (s, 3H), 1.15 (t,  $J = 7.2$  Hz, 3H);  $^{13}\text{C}$  NMR (100 MHz,  $\text{CDCl}_3$ ):  $\delta$  166.3, 159.3, 149.0, 147.2, 141.3, 140.4, 135.7, 135.6, 132.7, 130.4, 130.3, 129.8, 129.5, 129.5, 129.5, 128.7, 128.4, 127.0, 126.6, 126.5, 125.2, 124.5, 60.3, 21.0, 19.2, 14.1; HRMS (ESI) calcd for  $\text{C}_{28}\text{H}_{26}\text{NO}_2$  ( $\text{M}+\text{H}$ ) $^+$  408.1958, found 408.1965.

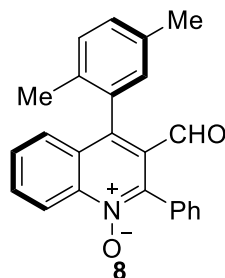

4-(2,5-Dimethylphenyl)-3-formyl-2-phenylquinoline 1-oxide **8** was obtained as a yellowish oil in 70% yield (24.7 mg) and 93% ee.  $R_f = 0.30$  (petroleum ether/ethyl acetate 3:1). The ee value was determined by chiral stationary phase HPLC analysis [Daicel Chiralpak AD-H, isopropanol/hexane (30:70), 1.0 mL/min,  $\lambda = 254$  nm,  $t_r$  (minor) = 8.91 min,  $t_r$  (major) = 11.81 min].  $[\alpha]_D^{25} = -12.70$  ( $c = 1.0$ , EtOAc);  $^1\text{H}$  NMR (400 MHz,  $\text{CDCl}_3$ ):  $\delta$  9.70 (s, 1H), 8.91 (d,  $J = 8.8$  Hz, 1H), 7.90 (t,  $J = 8.0$  Hz, 1H), 7.66-7.44 (m, 7H), 7.31-7.20 (m, 2H), 7.01 (s, 1H), 2.37 (s, 3H), 2.00 (s, 3H);  $^{13}\text{C}$  NMR (100 MHz,  $\text{CDCl}_3$ ):  $\delta$  189.7, 144.9, 142.9, 140.6, 135.6, 133.7, 133.0, 132.8, 131.2, 130.3, 130.2, 130.0, 129.5, 129.4, 128.8, 128.7, 128.2, 128.0, 120.6, 21.0, 19.5; HRMS (ESI) calcd for  $\text{C}_{24}\text{H}_{20}\text{NO}_2$  ( $\text{M}+\text{H}$ ) $^+$  354.1489, found 354.1497.

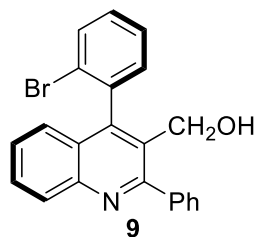

(4-(2-Bromophenyl)-2-phenylquinolin-3-yl)methanol **9** was obtained as a white solid in 91% yield (35.4 mg) and 93% ee.  $R_f = 0.20$  (petroleum ether/ethyl acetate 10:1). The ee value was determined by chiral stationary phase HPLC analysis [Daicel Chiralpak AD-H, isopropanol/hexane (20:80), 1.0 mL/min,  $\lambda = 254$  nm,  $t_r$  (minor) = 7.90 min,  $t_r$  (major) = 10.86 min]. m.p. 169-170 °C;  $[\alpha]_D^{25} = +21.60$  ( $c = 1.0$ , EtOAc);  $^1\text{H}$  NMR (400 MHz,  $\text{CDCl}_3$ ):  $\delta$  8.22 (d,  $J = 8.4$  Hz, 1H), 7.85-7.77 (m, 3H), 7.76-7.70 (m, 1H), 7.54-7.43 (m, 5H), 7.43-7.35 (m, 2H), 7.27-7.22 (m, 1H), 4.54 (d,  $J = 12.0$  Hz, 1H), 4.38 (d,  $J = 12.0$  Hz, 1H);  $^{13}\text{C}$  NMR (100 MHz,  $\text{CDCl}_3$ ):  $\delta$  160.9, 148.2, 147.2, 140.3, 137.4, 133.1, 131.5, 130.2, 130.0, 129.6, 129.2, 129.0, 128.6, 128.4, 127.7, 127.0, 126.2, 125.9, 123.4, 60.2; HRMS (ESI) calcd for  $\text{C}_{22}\text{H}_{17}\text{BrNO}$  ( $\text{M}+\text{H}$ ) $^+$  390.0488, found 390.0495.

### Investigation on the Racemization Barrier of **3aa**

The reaction was conducted at 1 mg/mL concentration in a sealed tube and heated at the specified temperature. The change in enantiomeric excess over time was determined by HPLC. The barrier to rotation for **3aa** was obtained by kinetic of racemization of an enantiomer.

This data was plotted as  $(\ln[\text{ee}_0/\text{ee}_t])$  versus time (seconds). The gradient of this graph gives the racemization constant ( $k_{\text{racemization}} = 2 \times k_{\text{enantiomerization}}$ ) at the specified temperature. The barrier to rotation,  $\Delta G^\ddagger_{\text{enantiomerization}}$ , was calculated using the following Eyring equation,  $R$  = Gas constant =  $8.3145 \text{ J}\cdot\text{K}^{-1}\cdot\text{mol}^{-1}$ ,  $h$  = Planck constant =  $6.62608 \times 10^{-34} \text{ J}\cdot\text{s}$ ,  $k_B$  = Boltzmann constant =  $1.38066 \times 10^{-23} \text{ J}\cdot\text{K}^{-1}$ , and  $T_1$  = temperature racemization study was conducted at, in Kelvin.

$$\Delta G^\ddagger_{\text{enantiomerization}} = RT_1 \ln \frac{k_B T_1}{h k_{\text{enantiomerization}}}$$

Racemization of **3aa** in *i*-PrOH at 140 °C

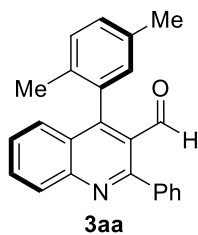

**Table S1. Investigation on the racemization barrier of 3aa**

| Time (seconds) | Enantiomeric Excess (ee) | First Order Racemization<br>( $\ln[ee_0/ee_t]$ ) |
|----------------|--------------------------|--------------------------------------------------|
| 0              | 92.58                    | 0.00000                                          |
| 3600           | 90.82                    | 0.01919                                          |
| 7200           | 88.34                    | 0.04688                                          |
| 14400          | 87.64                    | 0.05484                                          |
| 28800          | 85.70                    | 0.07722                                          |
| 43200          | 82.18                    | 0.11916                                          |
| 57600          | 77.14                    | 0.18245                                          |
| 72000          | 74.38                    | 0.21889                                          |
| 86400          | 72.14                    | 0.24946                                          |
| 100800         | 69.76                    | 0.28301                                          |

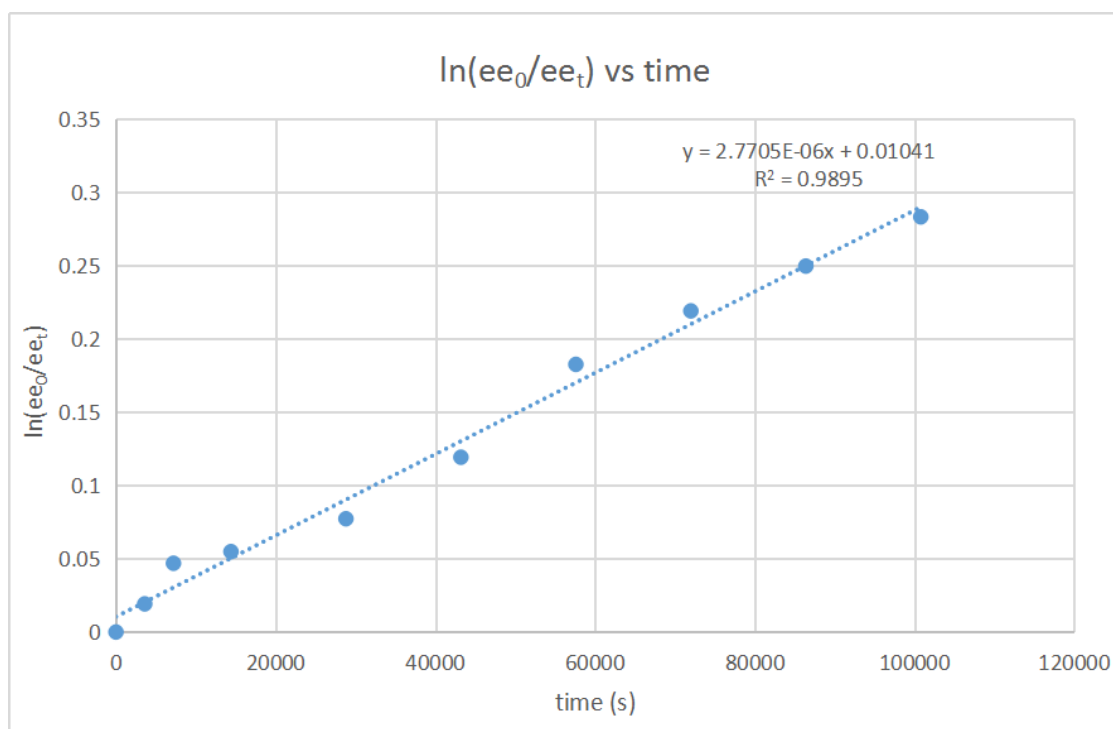

$$k_{\text{racemization}} (140\text{ }^{\circ}\text{C}) = 2.7705 \times 10^{-6} \text{ s}^{-1}$$

$$k_{\text{enantiomerization}} (140\text{ }^{\circ}\text{C}) = 1.38525 \times 10^{-6} \text{ s}^{-1}$$

$$\Delta G^{\ddagger}_{\text{enantiomerization}} = 148.654 \text{ KJ/mol} = 35.51 \text{ kcal/mol}$$

## References

- 1 F. Romanov-Michailidis, C. Besnard and A. Alexakis, *N*-Heterocyclic Carbene-Catalyzed Annulation of  $\alpha$ -Cyano-1,4-diketones with Ynals, *Org. Lett.*, 2012, **14**, 4906.
- 2 Y.-D. Shao, M.-M. Dong, Y.-A. Wang, P.-M. Cheng, T. Wang and D.-J. Cheng, Organocatalytic Atroposelective Friedländer Quinoline Heteroannulation, *Org. Lett.*, 2019, **21**, 4831.
- 3 G. Liao, H.-M. Chen, Y.-N. Xia, B. Li, Q.-J. Yao and B.-F. Shi, Synthesis of Chiral Aldehyde Catalysts by Pd-Catalyzed Atroposelective C-H Naphthylation, *Angew. Chem., Int. Ed.*, 2019, **58**, 11464.
- 4 T. Katsina, S. P. Sharma, R. Buccafusca, D. J. Quinn, T. S. Moody and S. Arseniyadis, Sequential Palladium-Catalyzed Allylic Alkylation/retro-Dieckmann Fragmentation Strategy for the Synthesis of  $\alpha$ -Substituted Acrylonitriles, *Org. Lett.*, 2019, **21**, 9348.

## NMR Spectra of 2-Aminoaryl Ketones 1

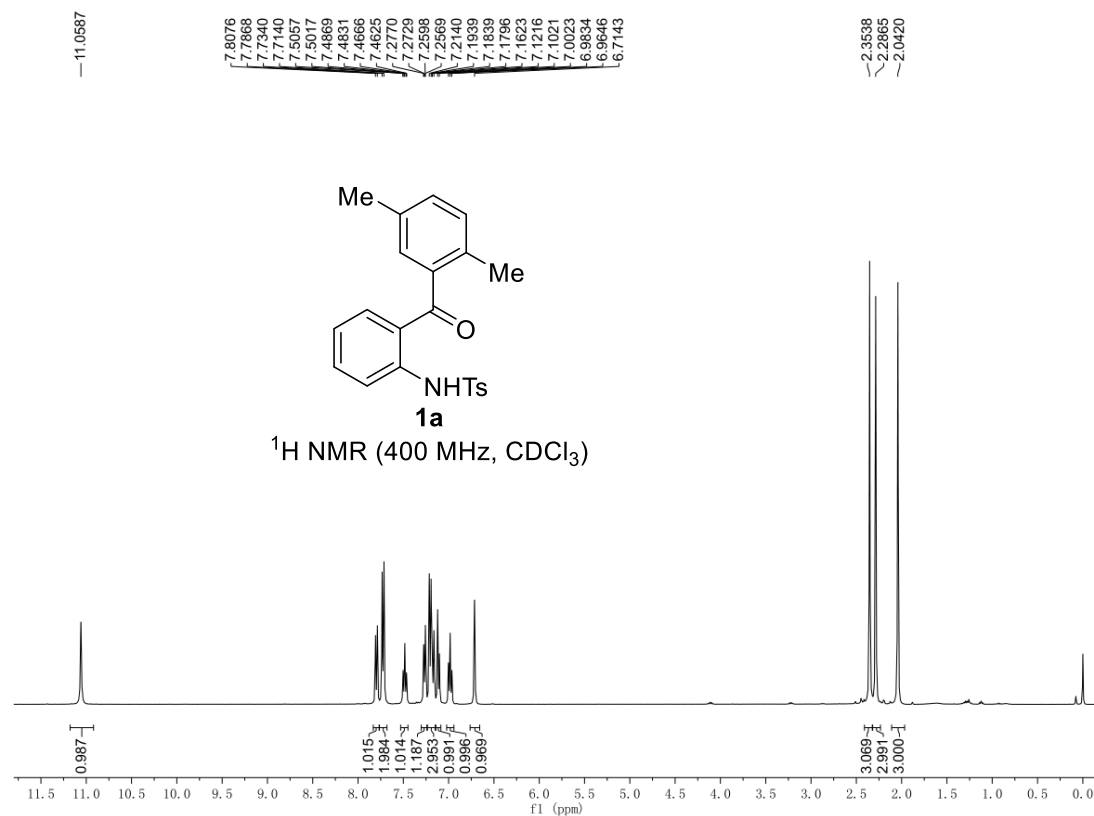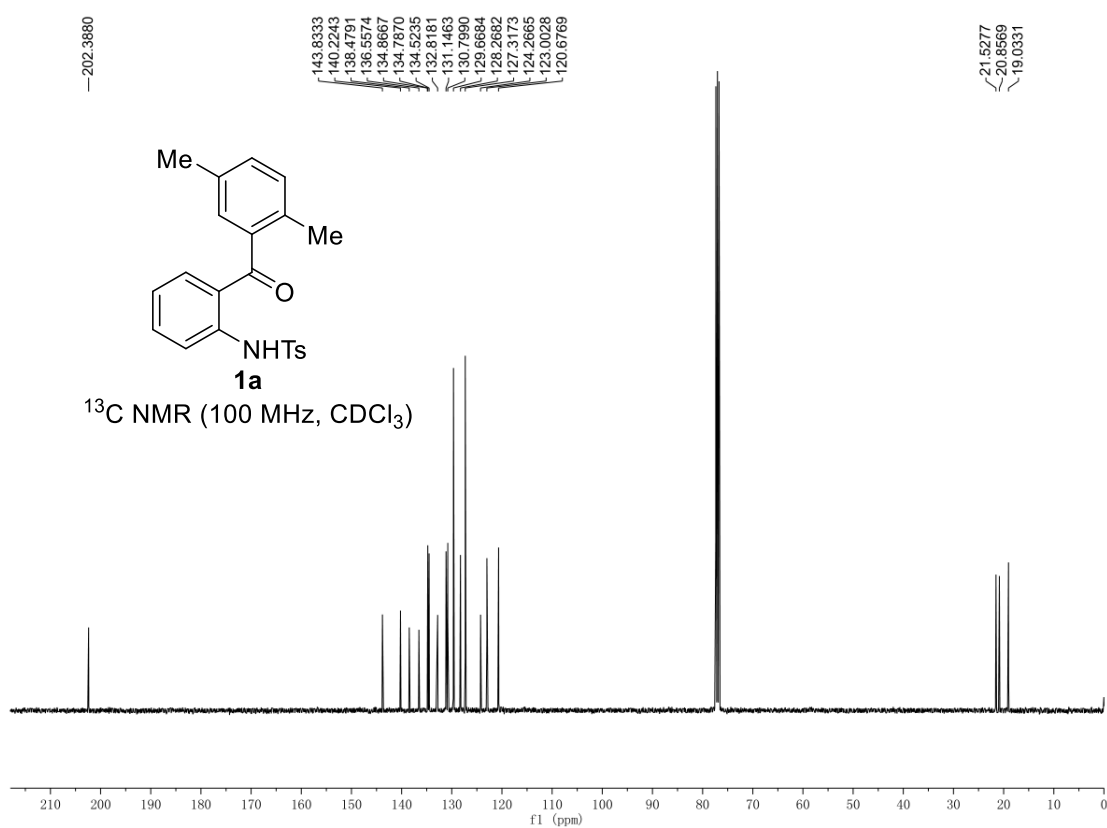



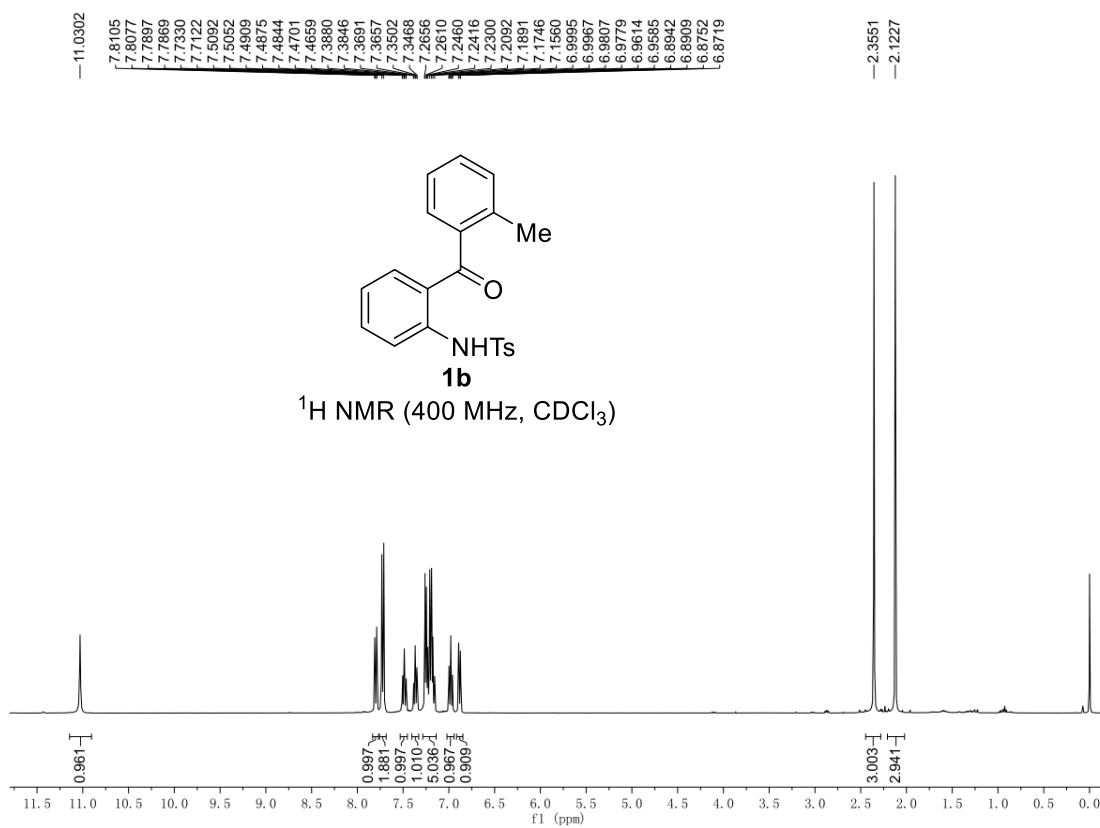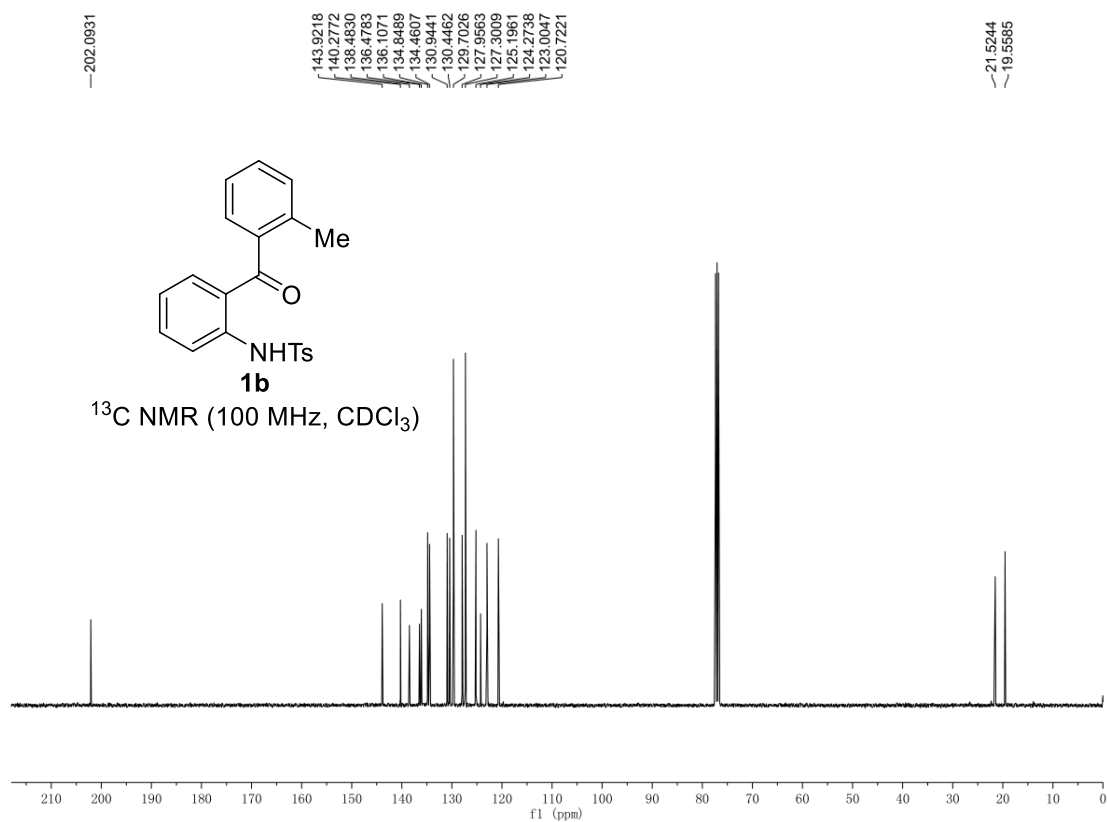

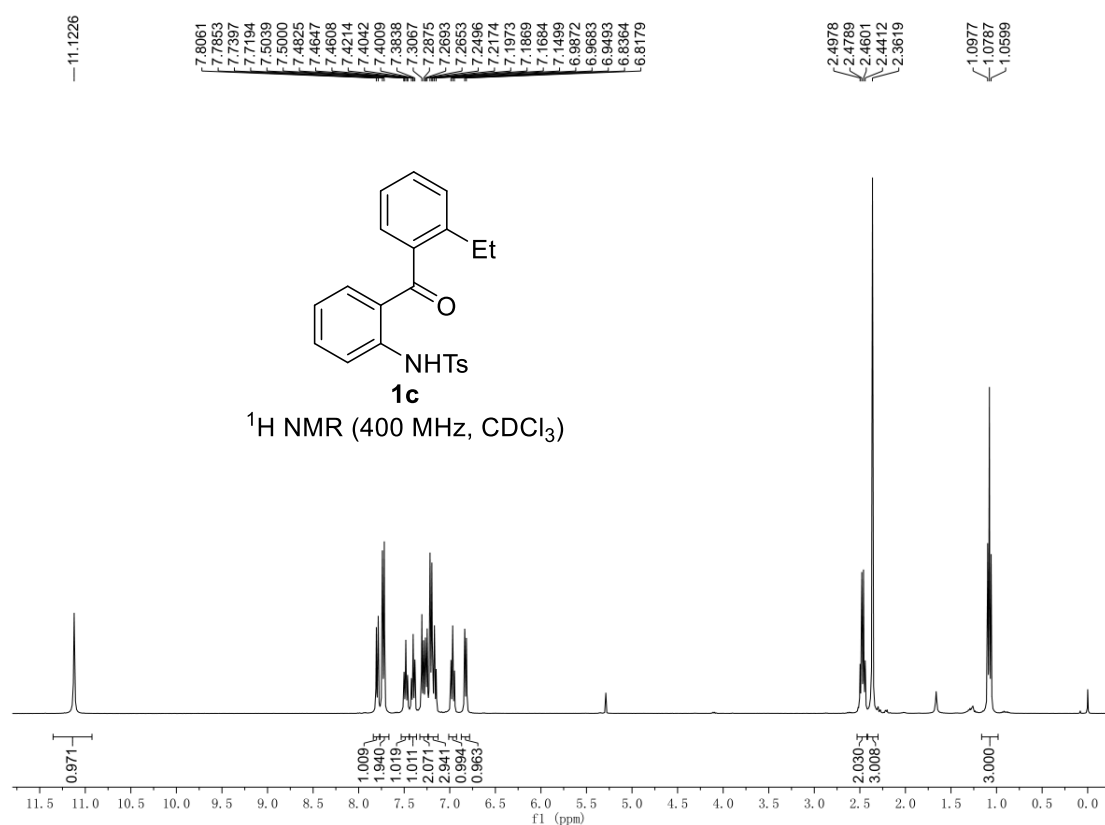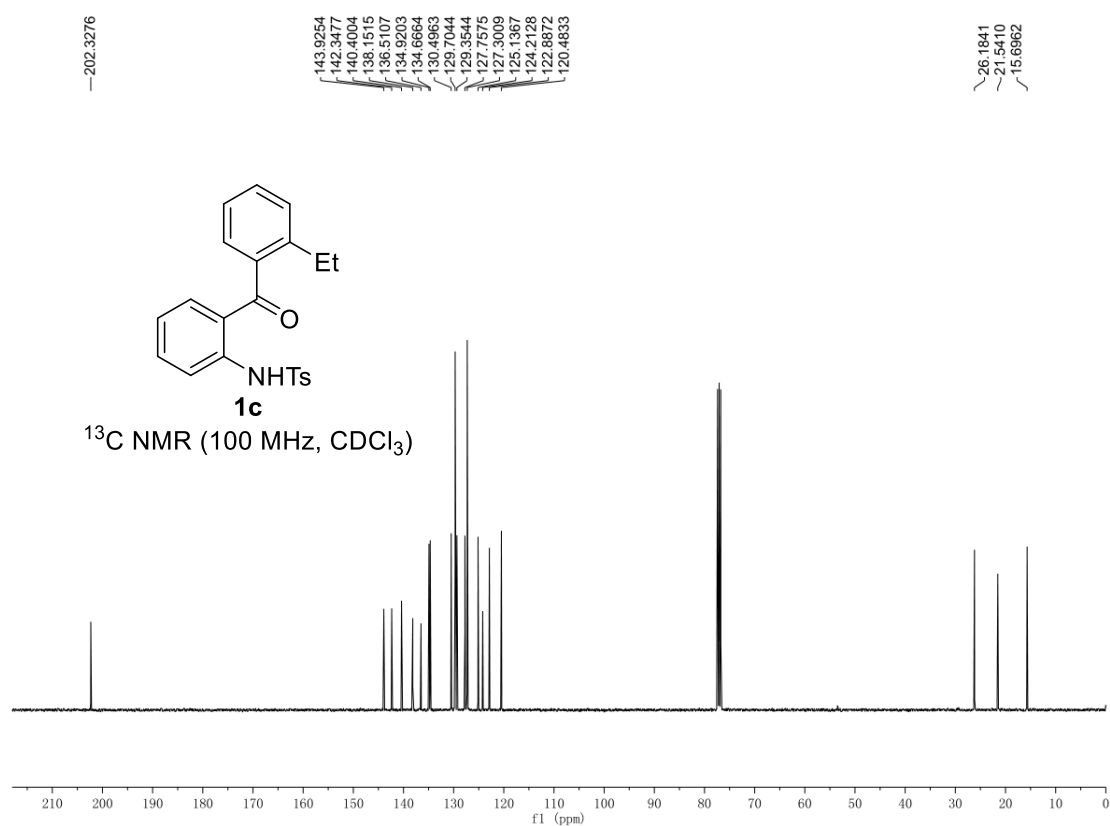

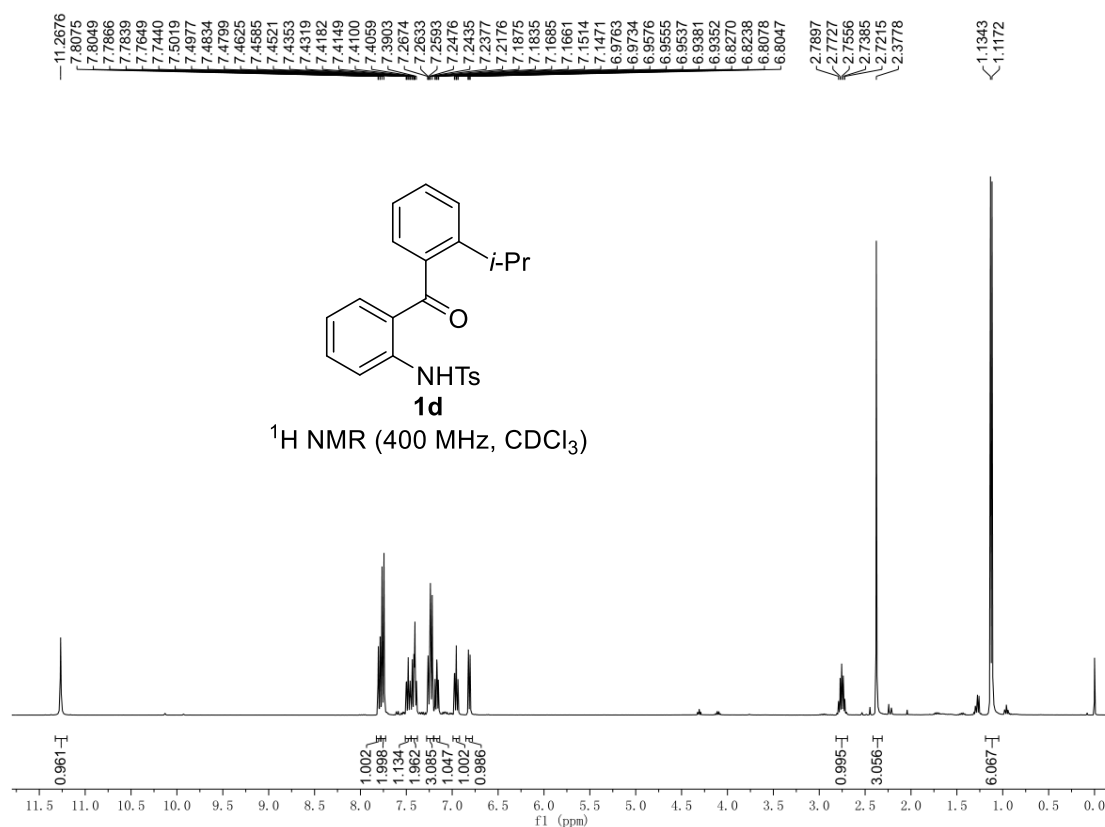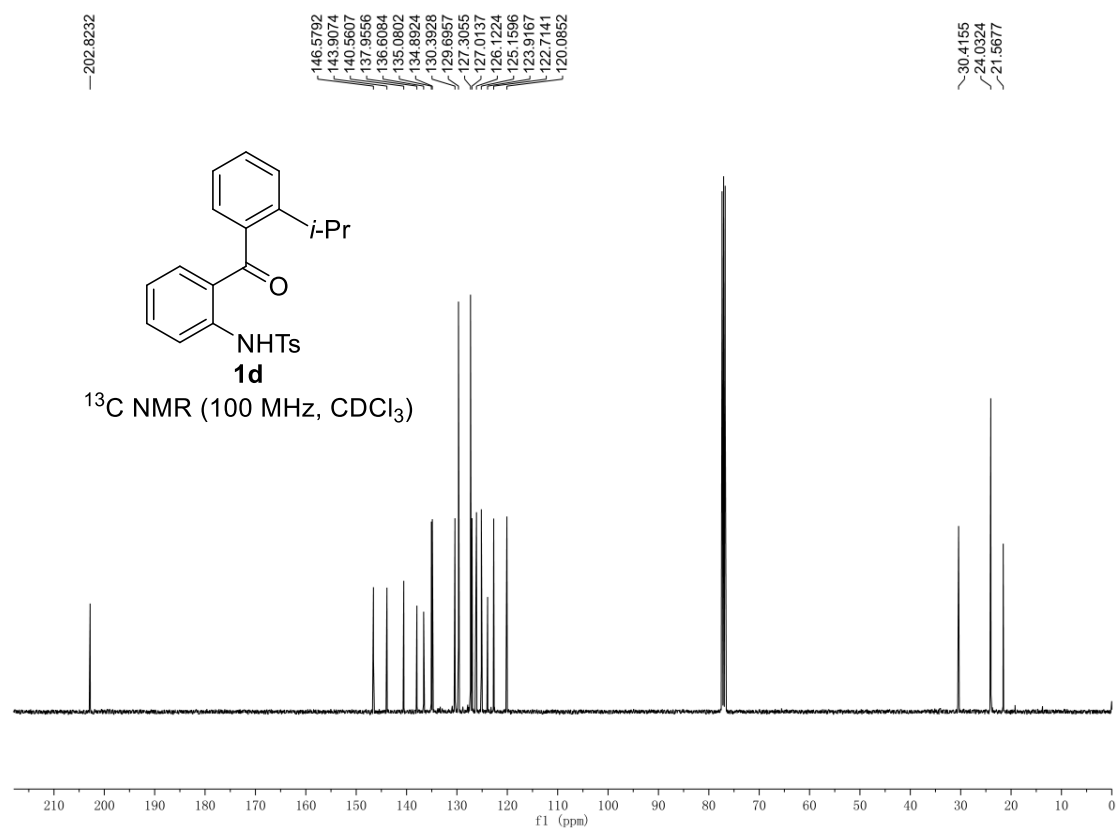

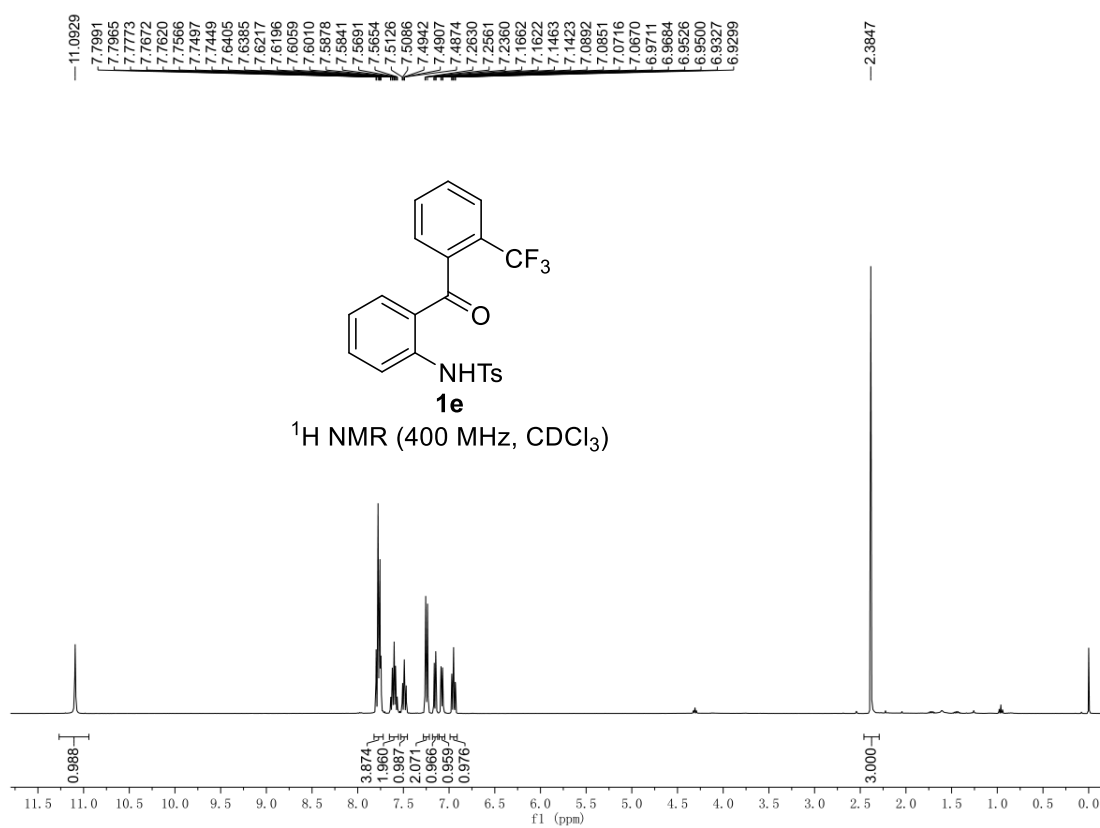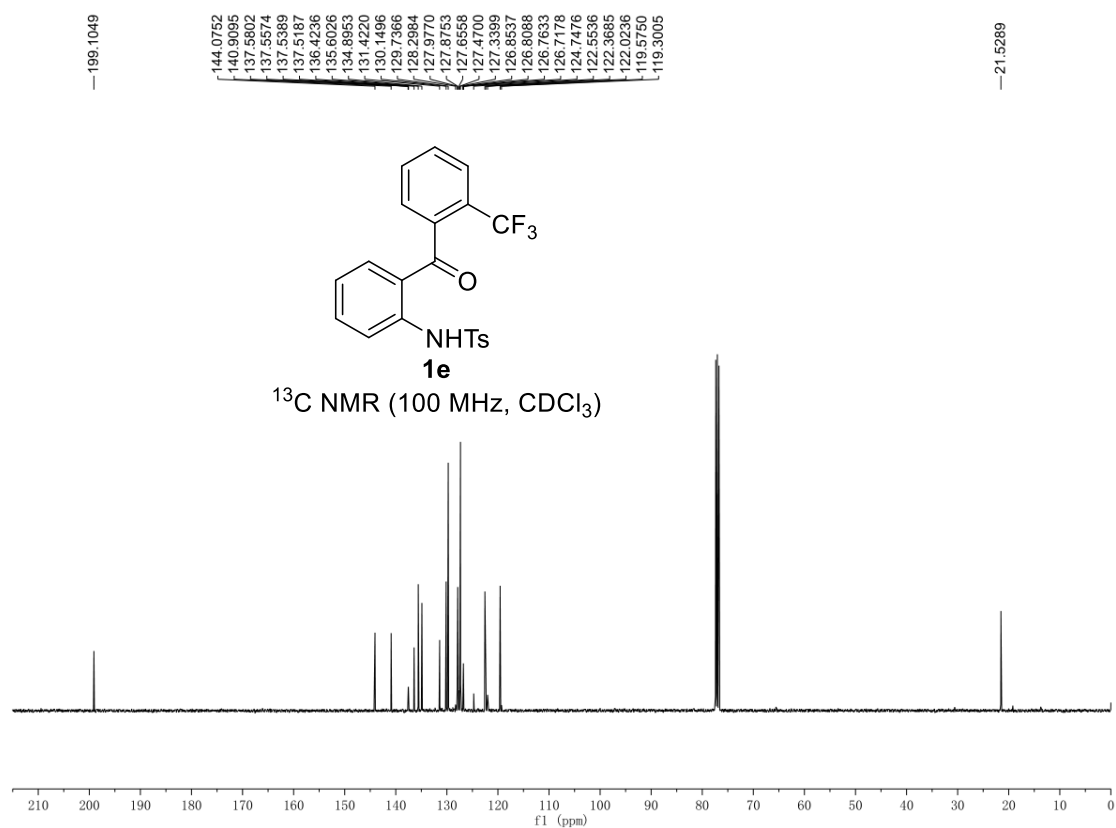

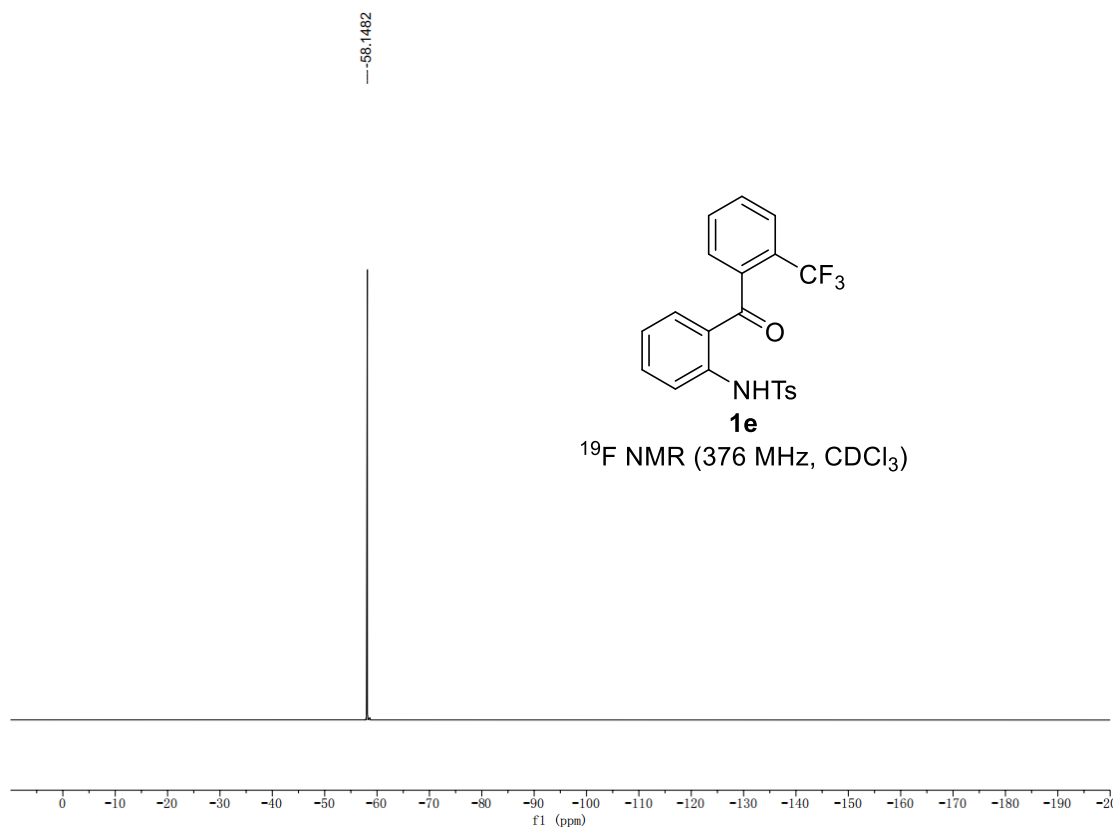

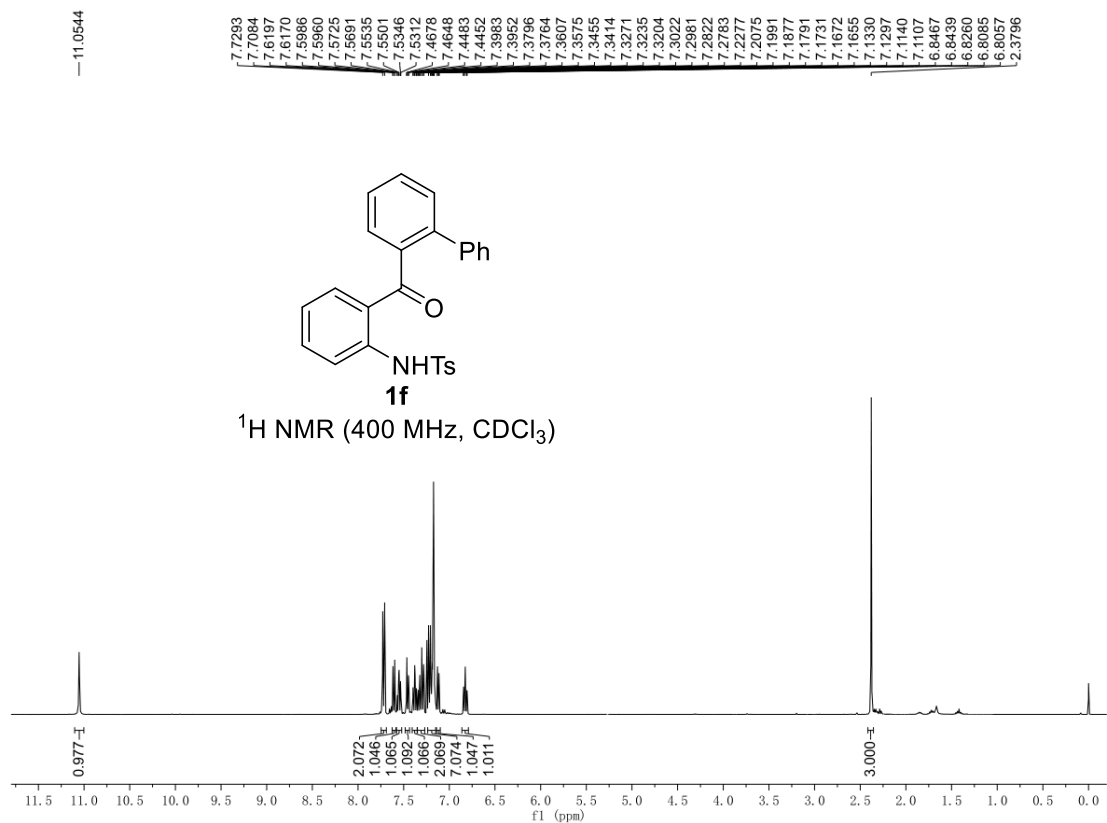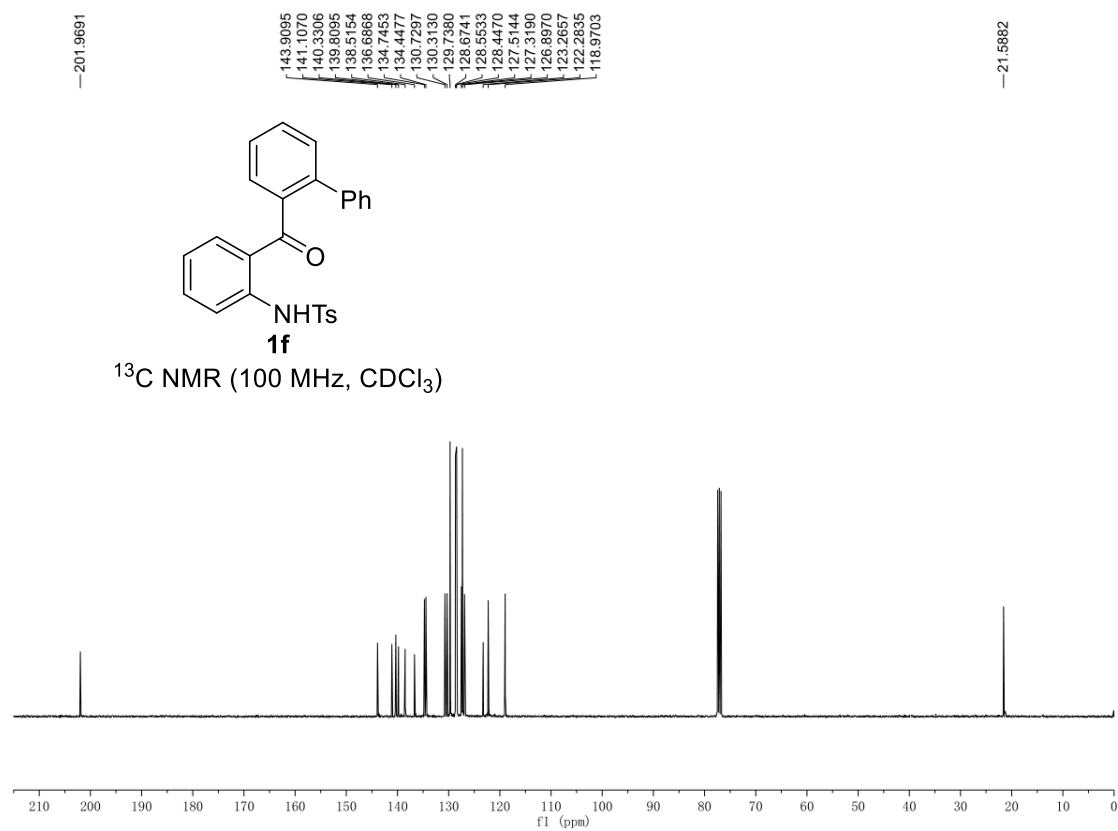

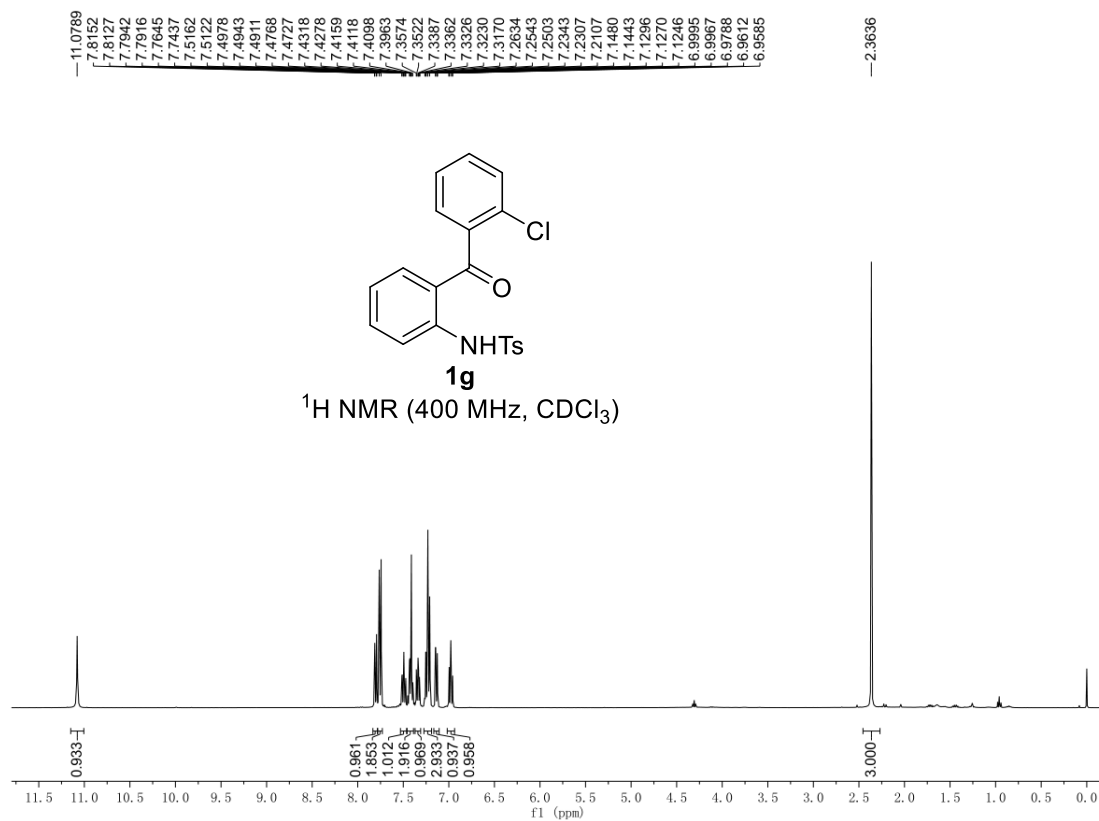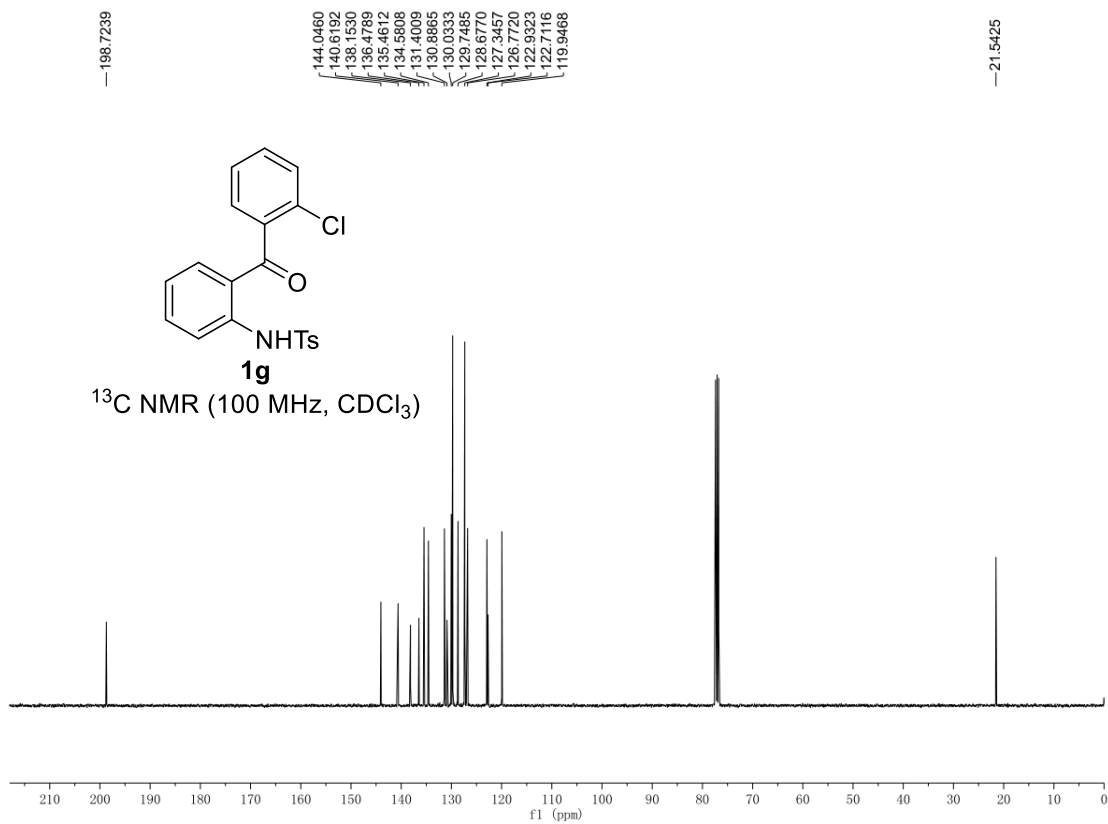

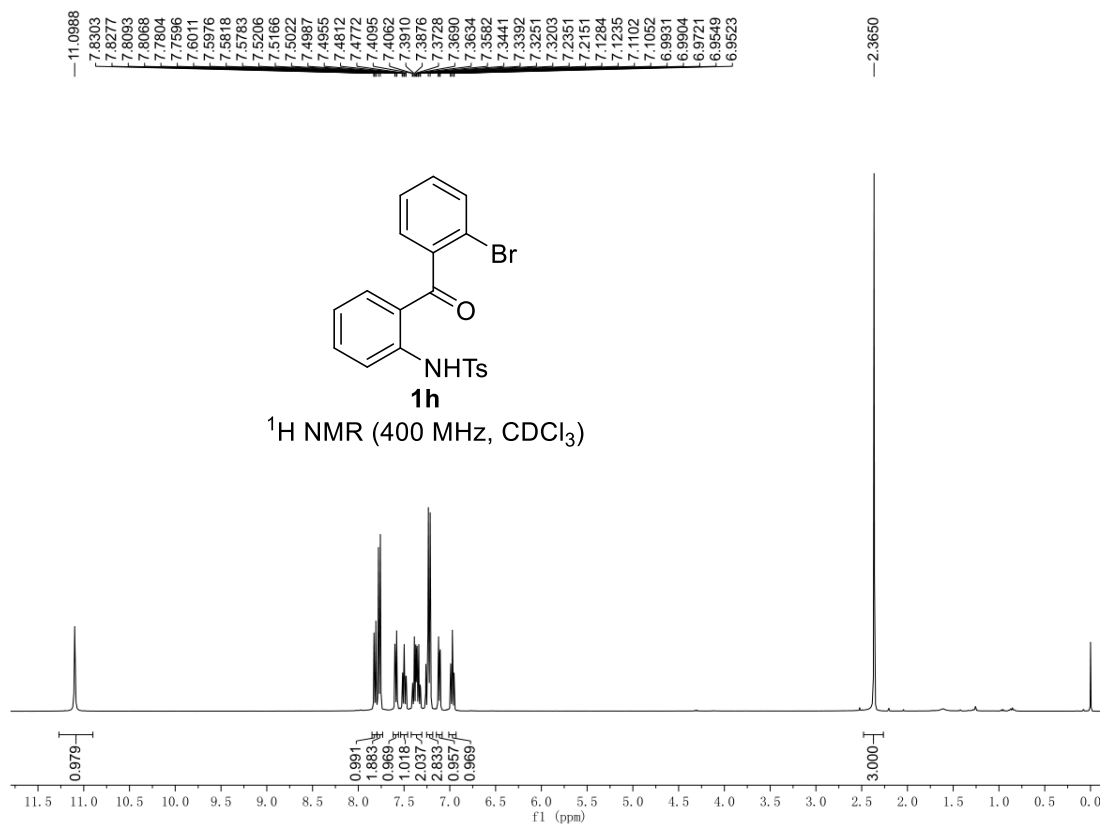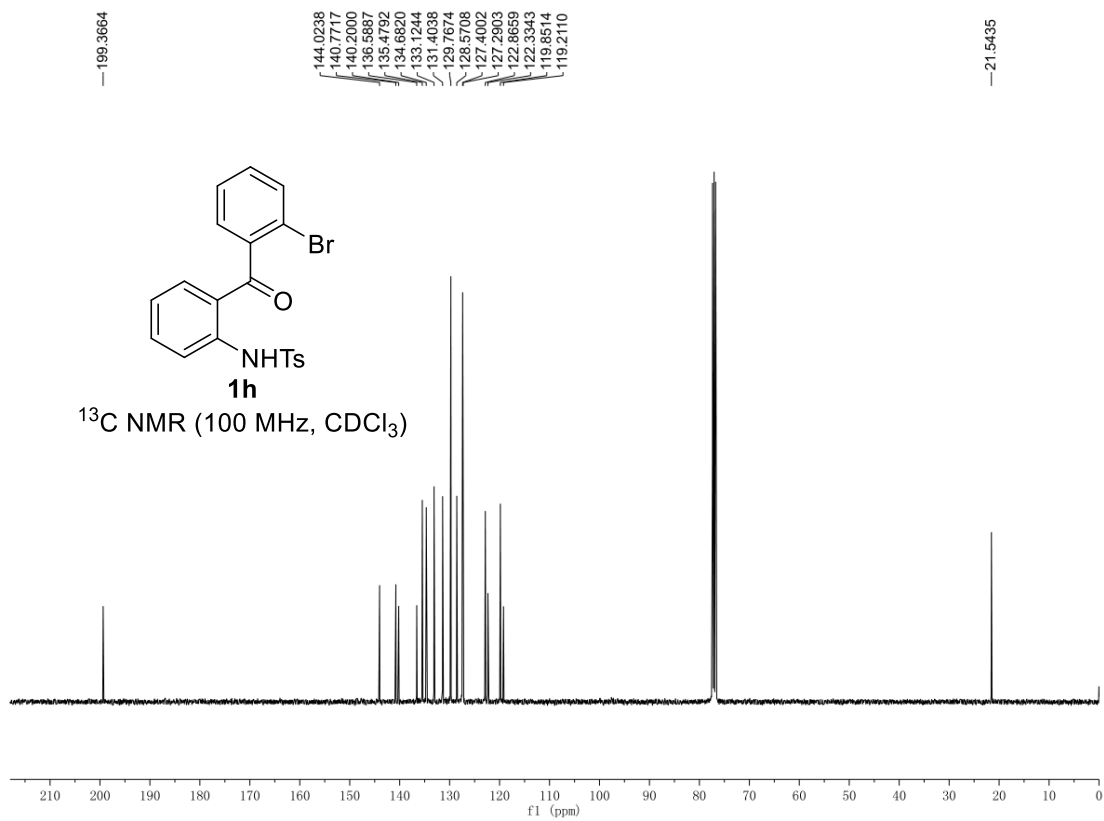



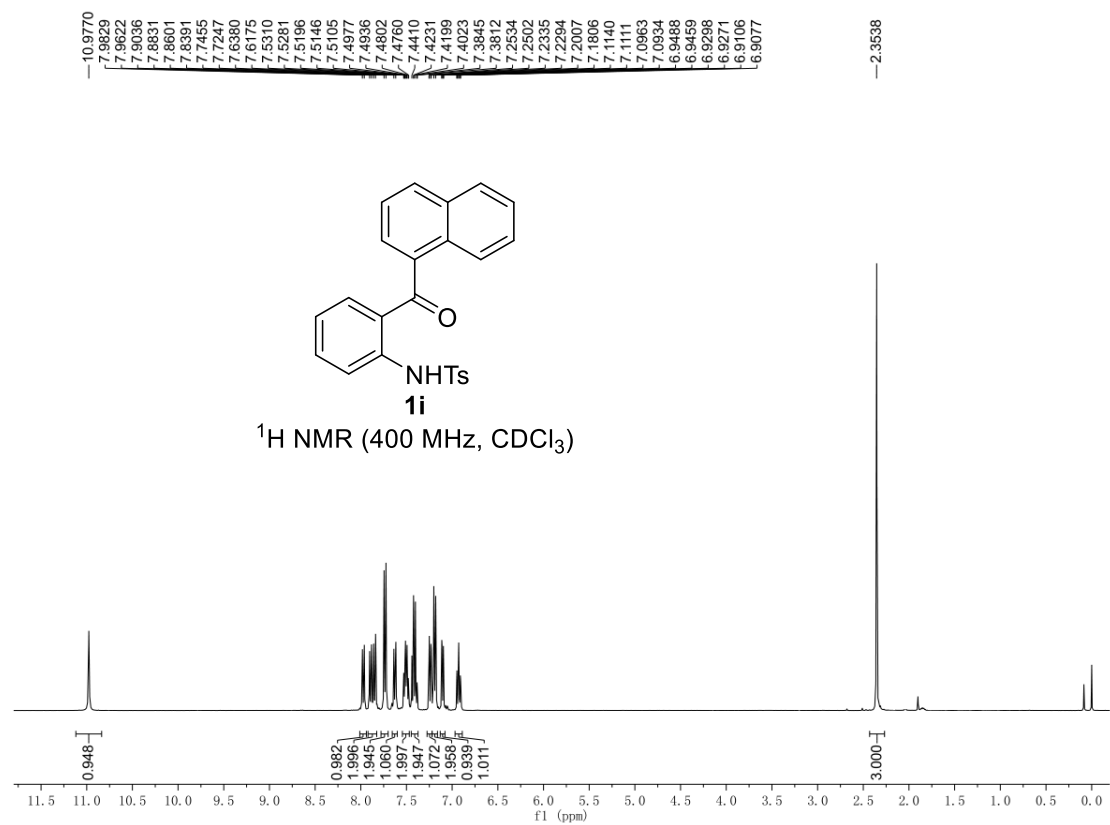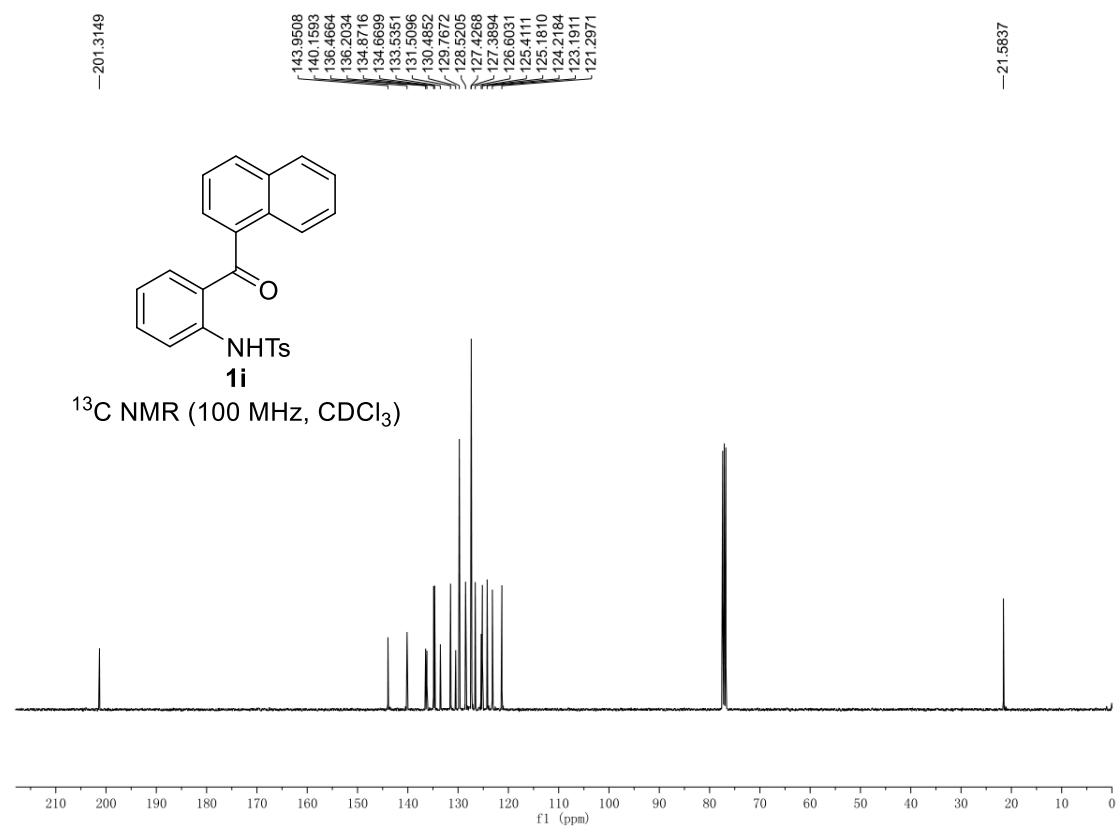

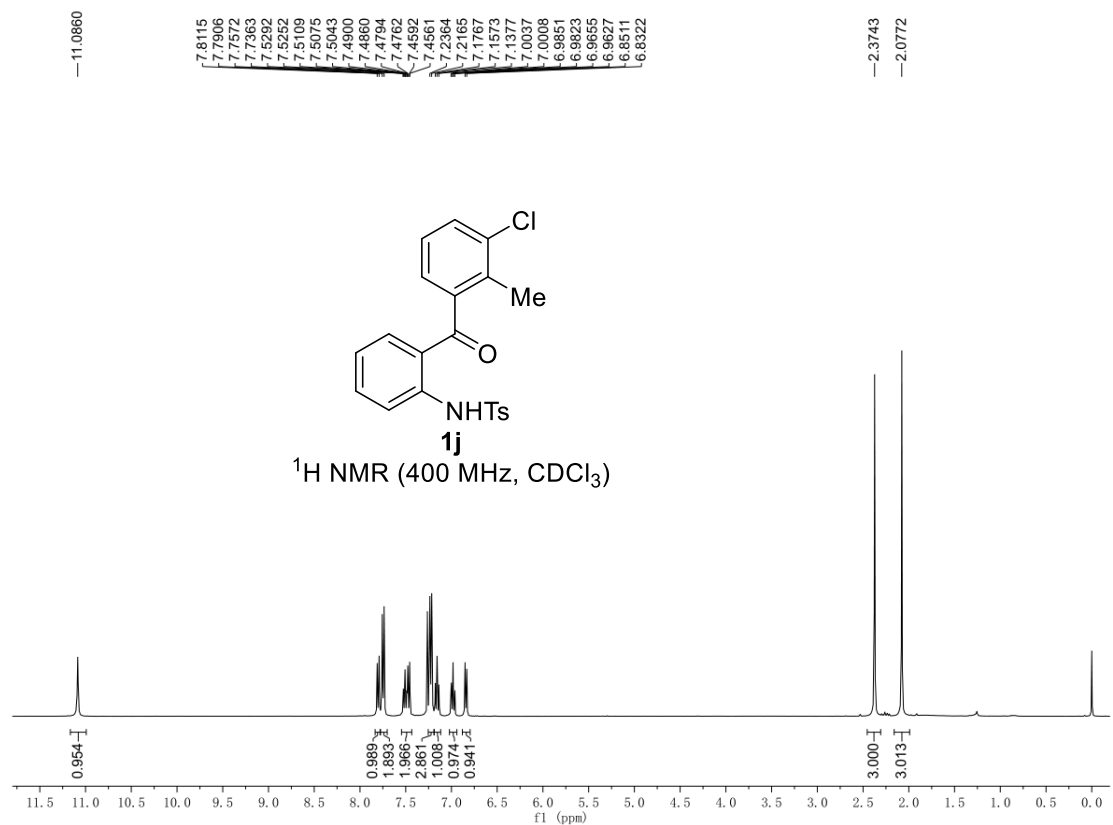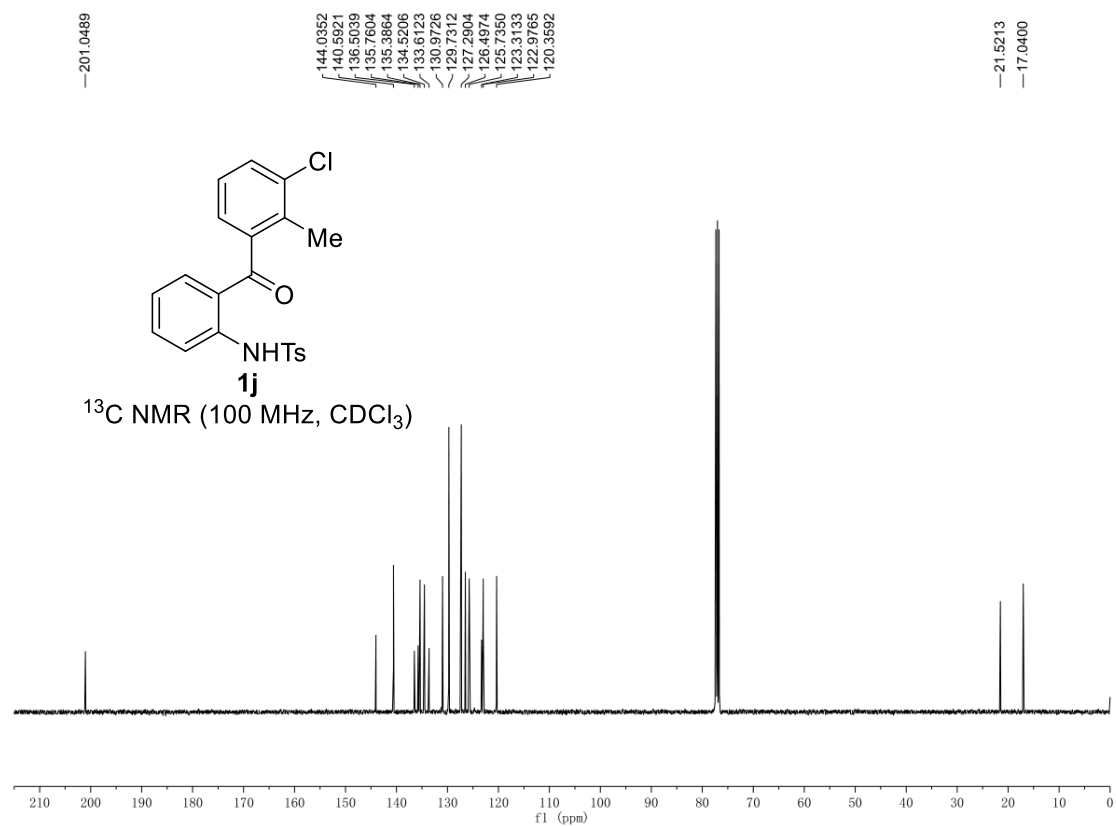

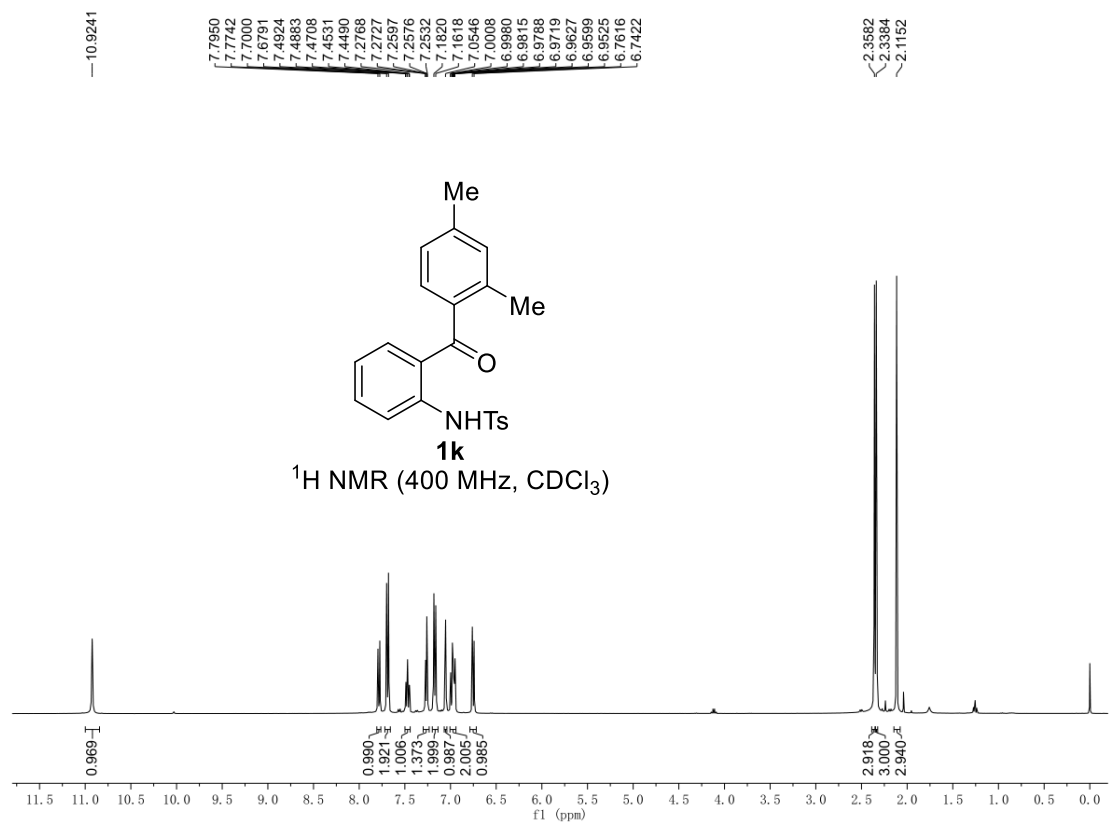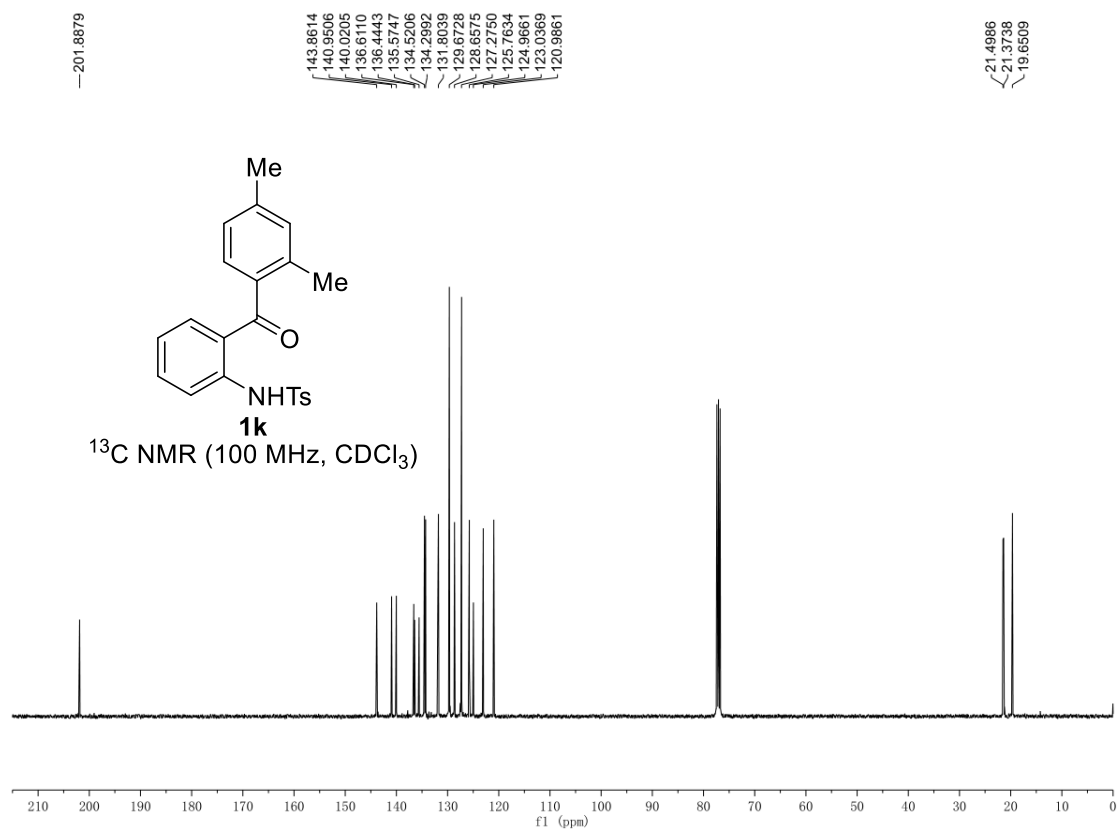

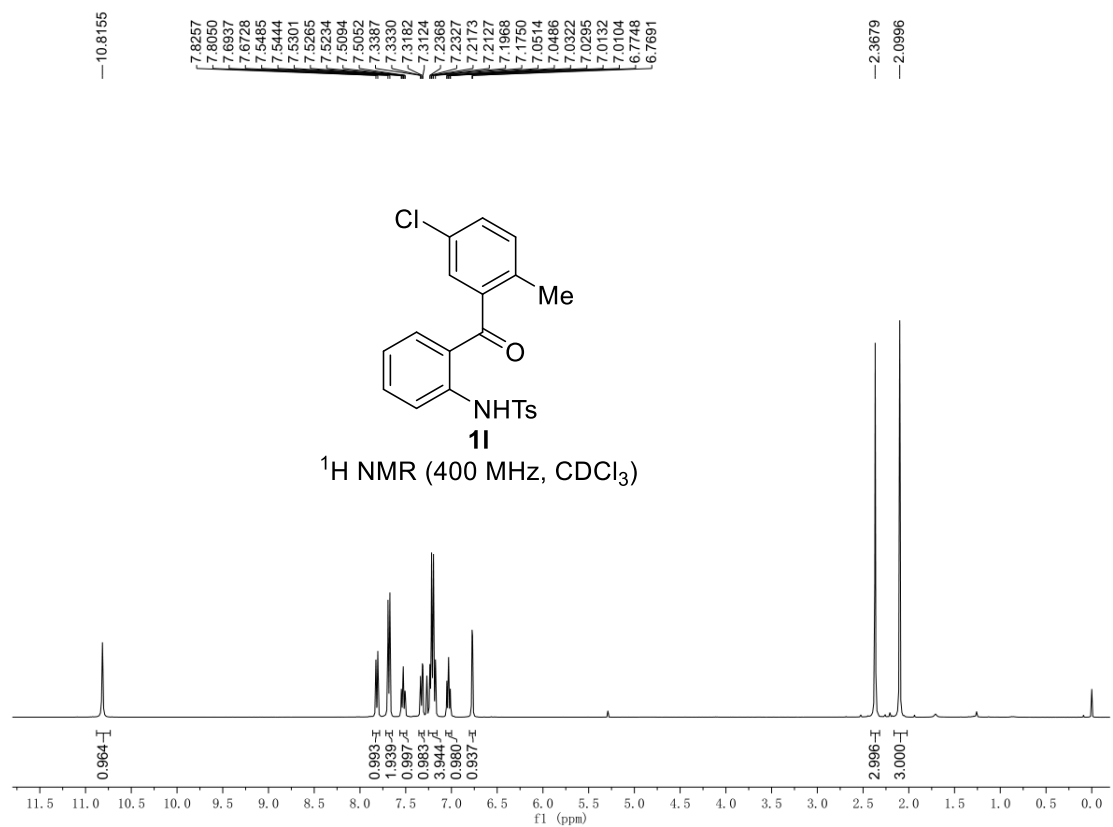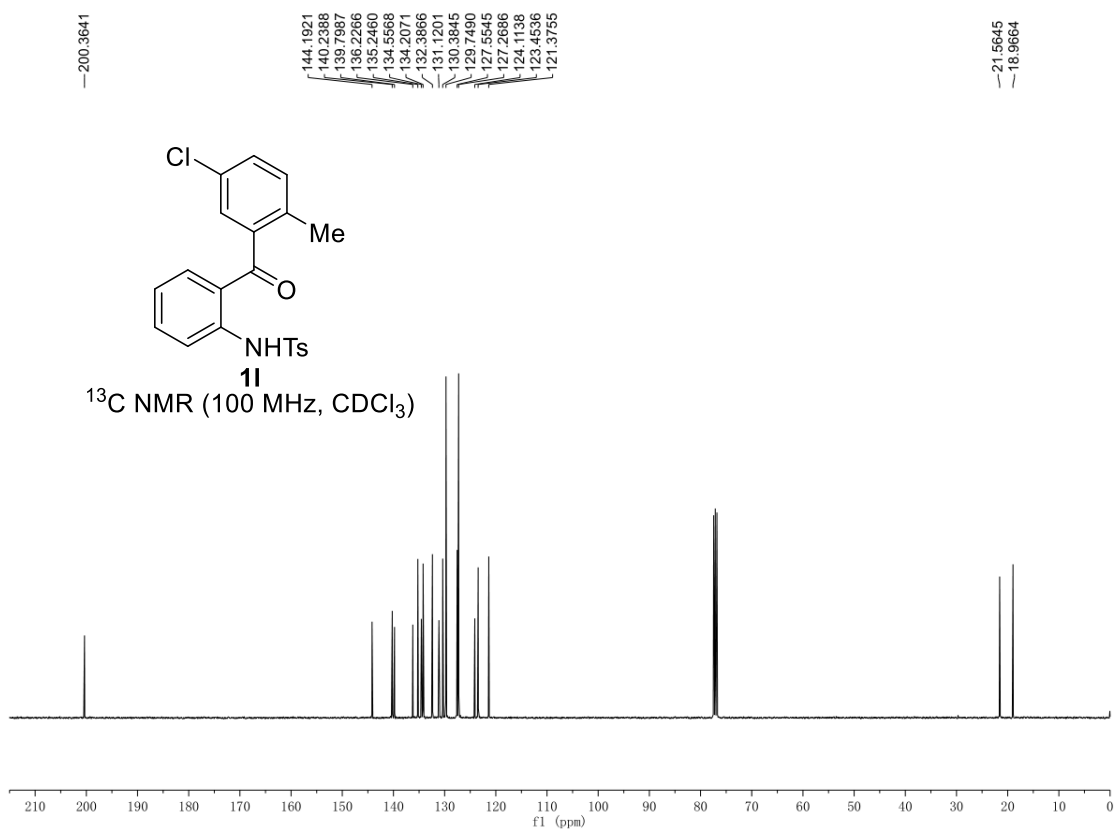

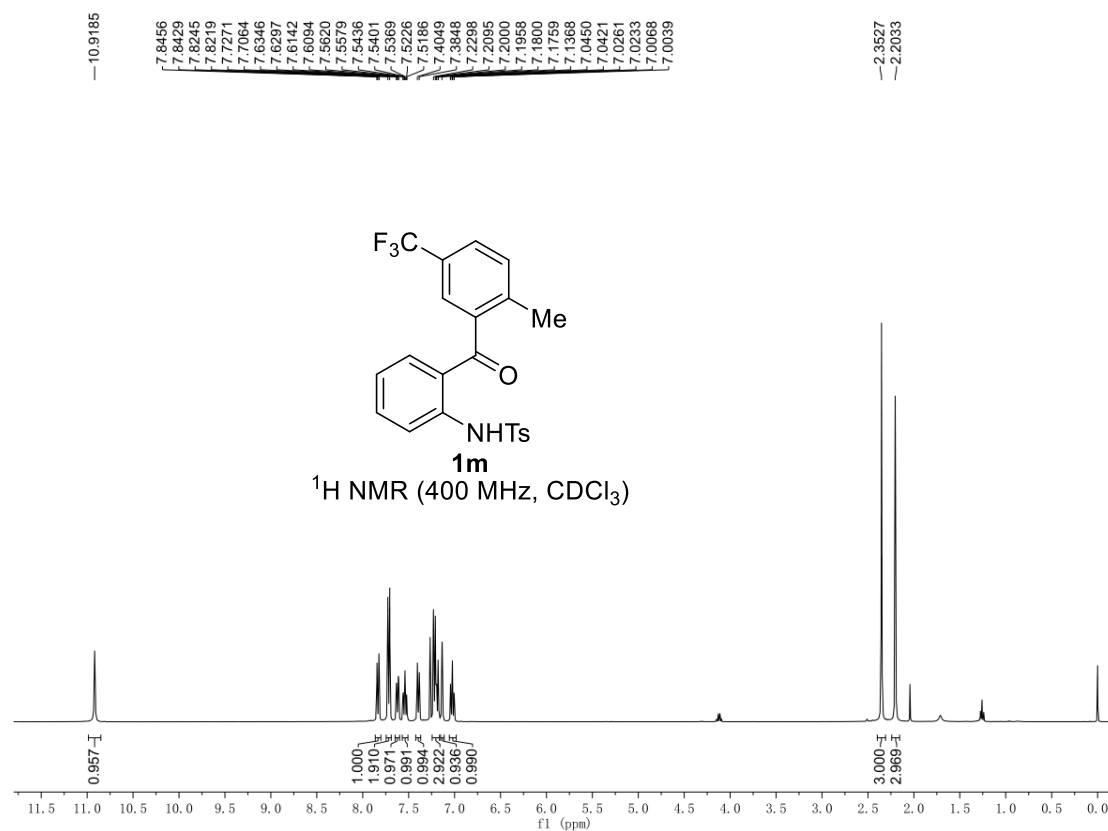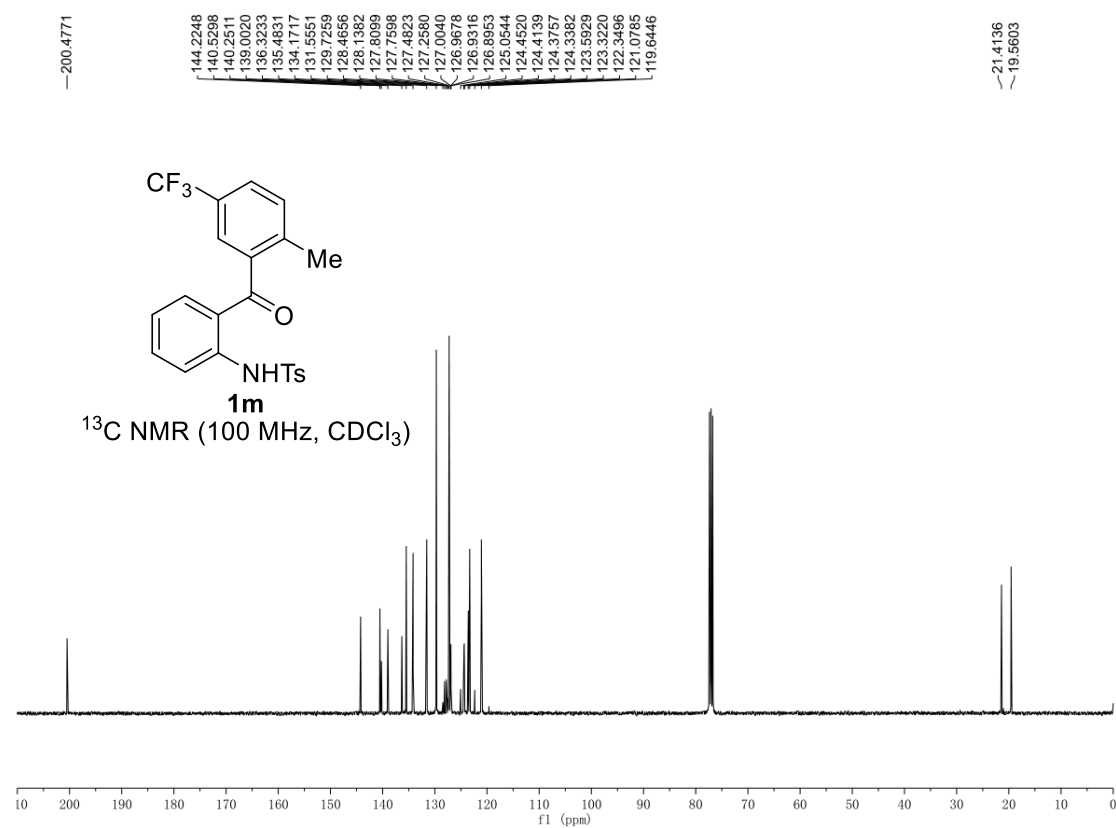

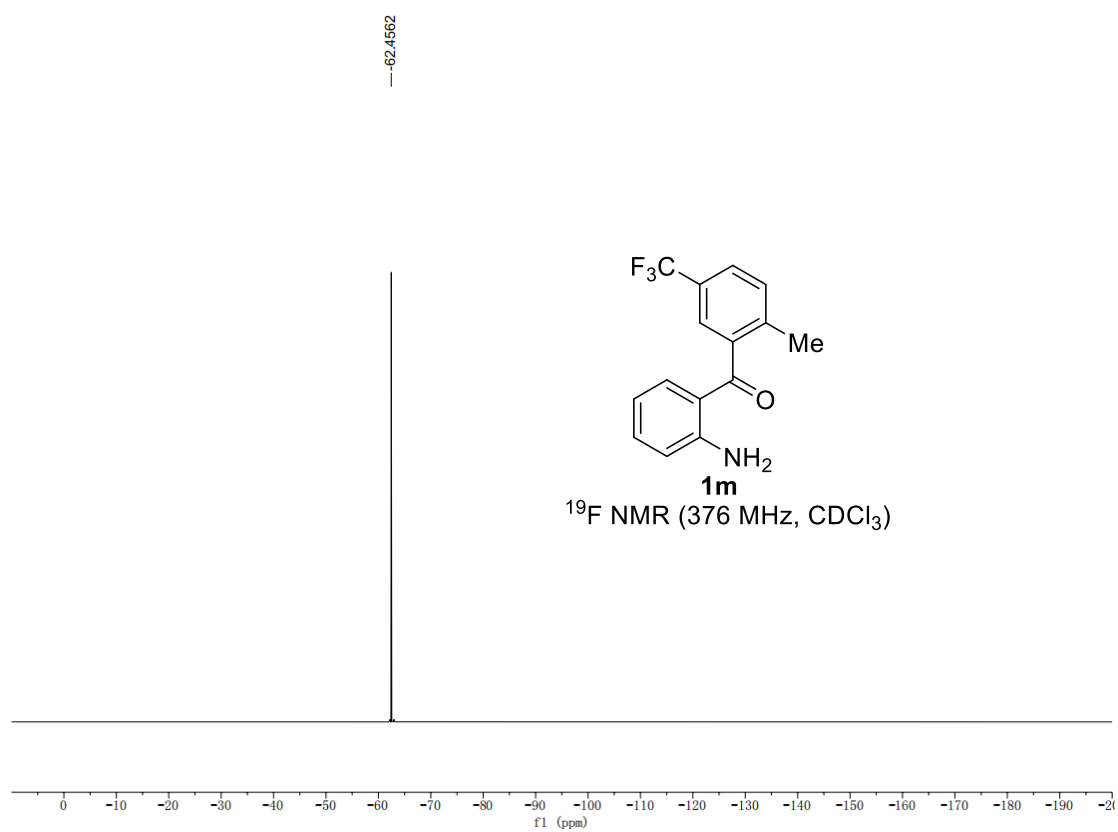

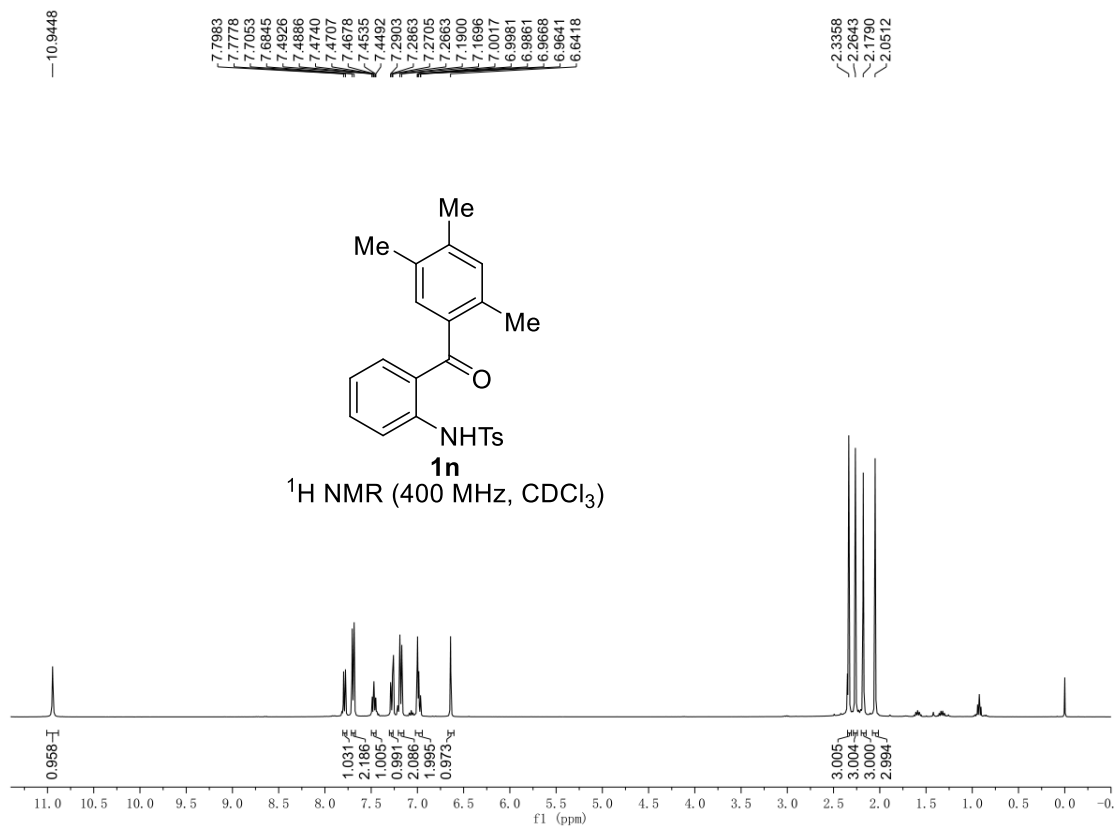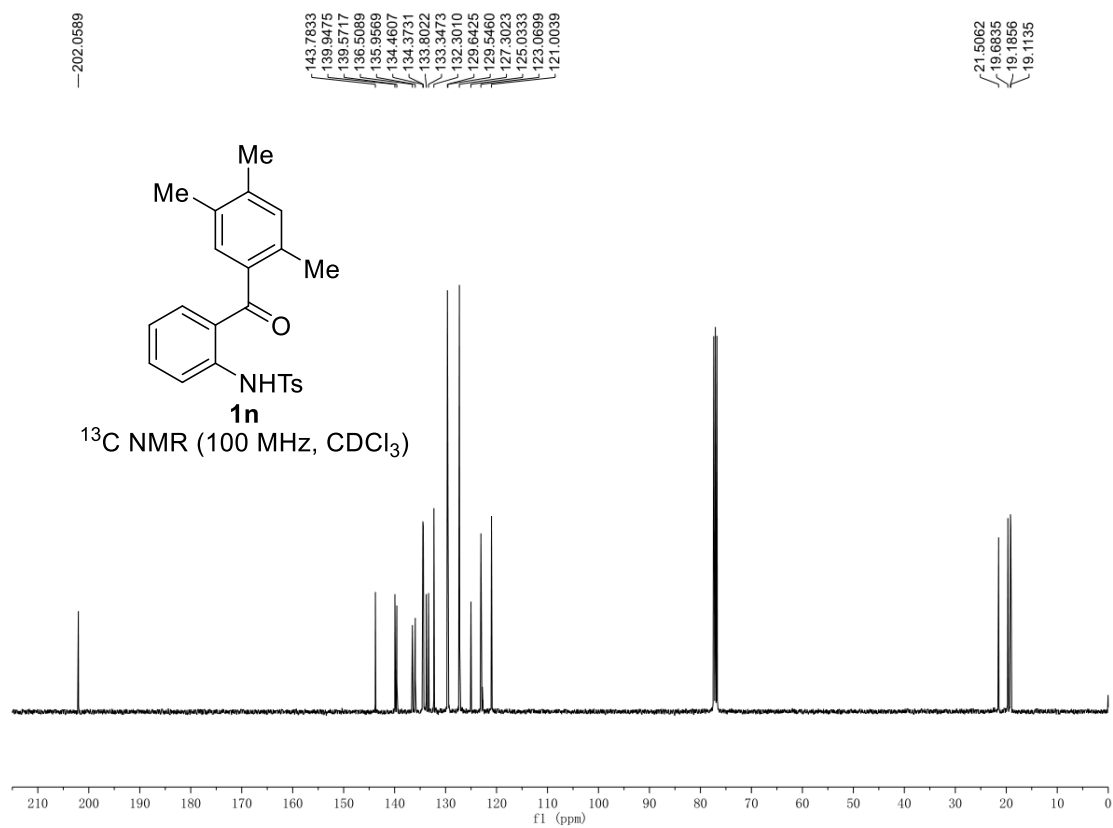

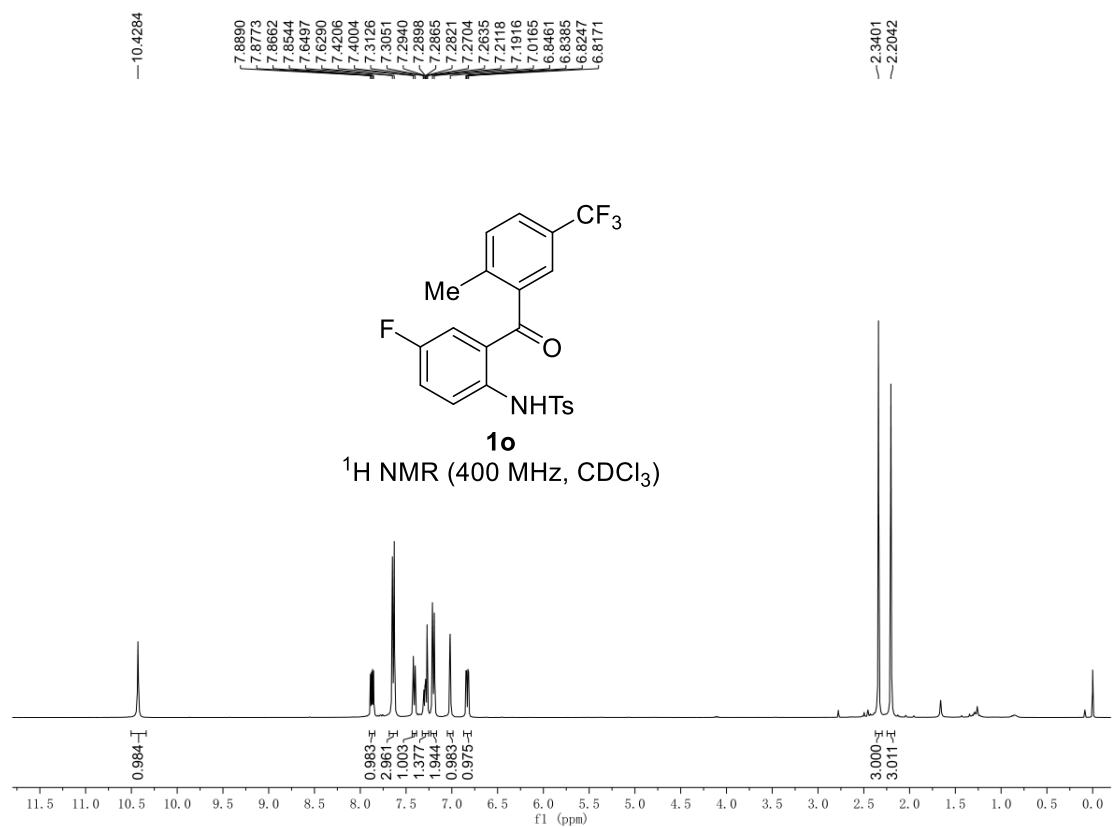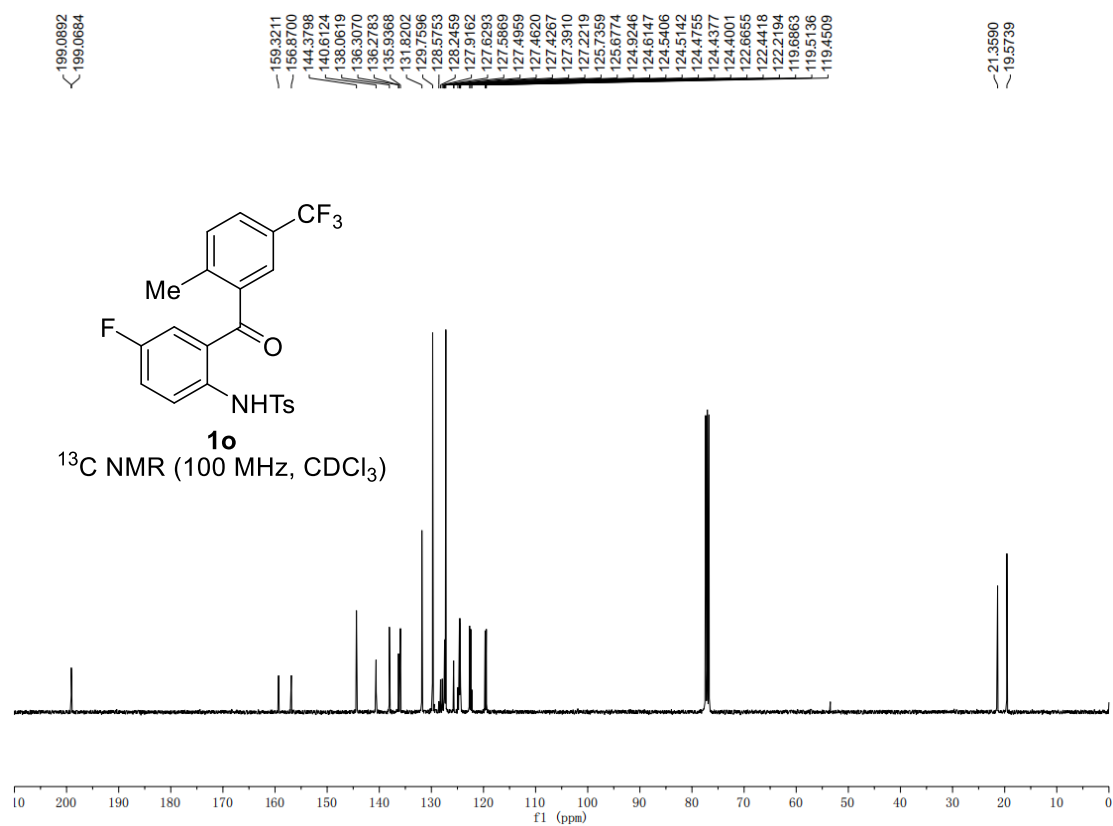



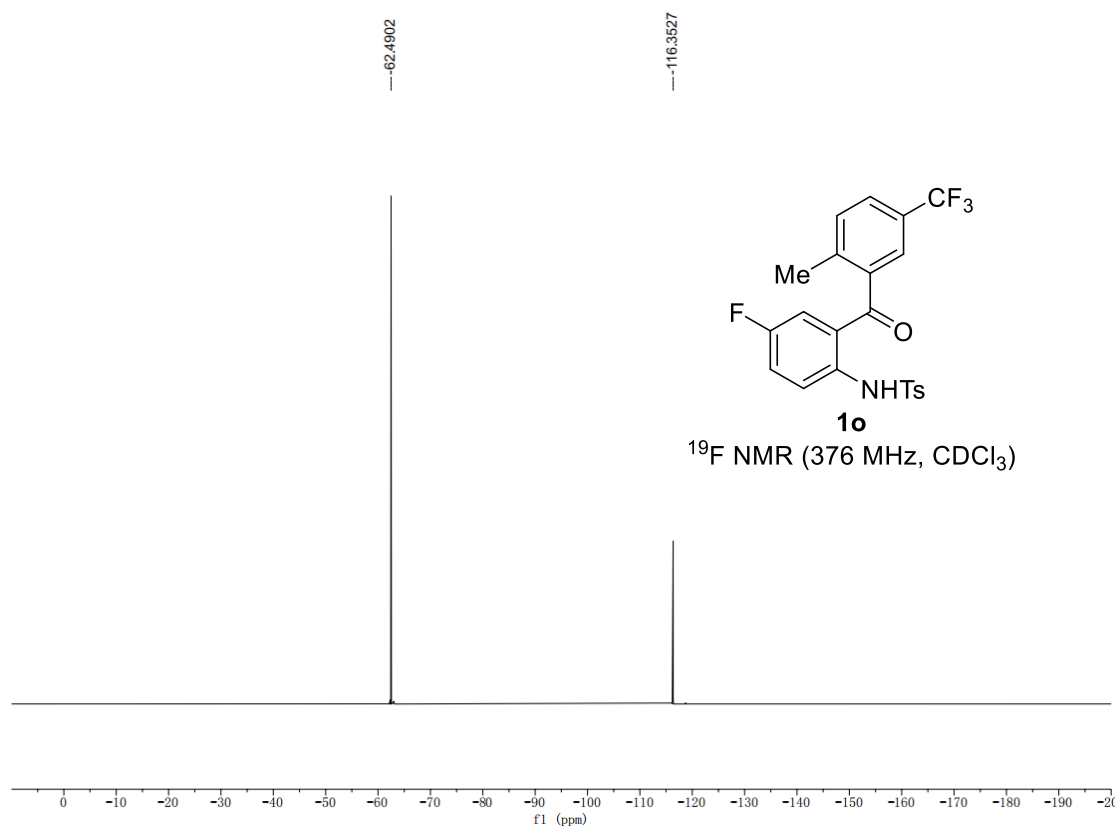

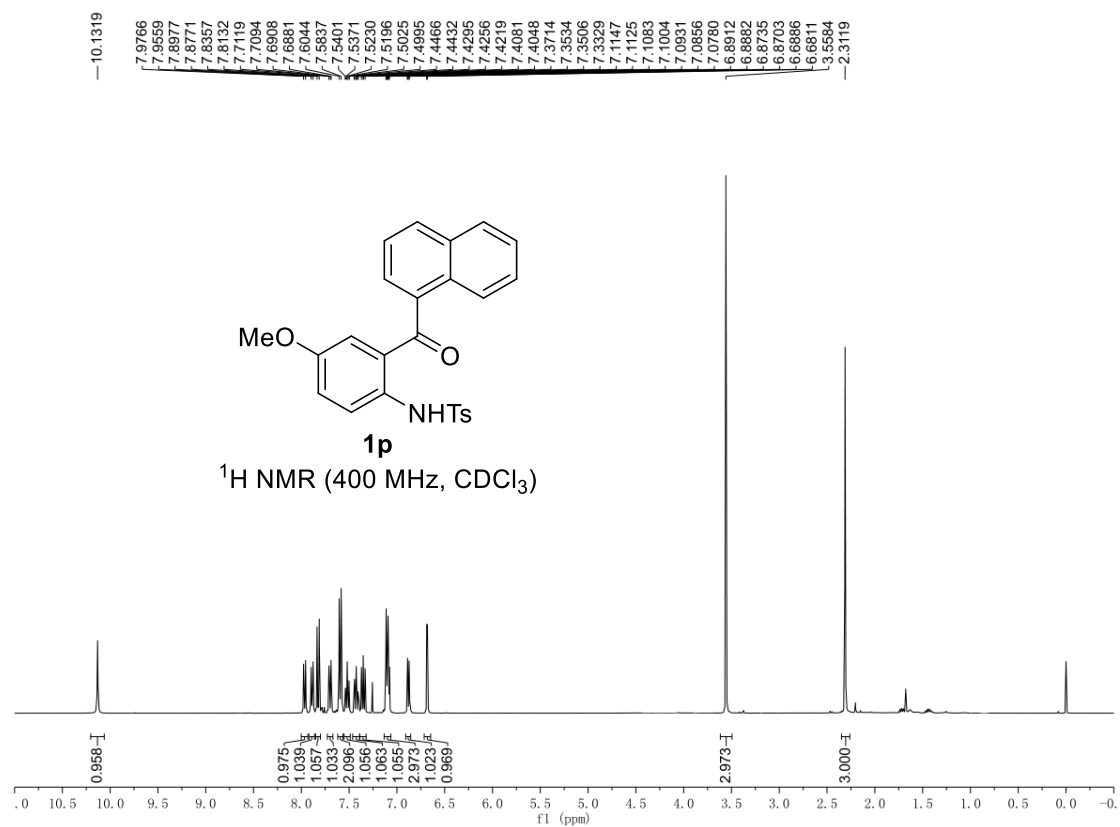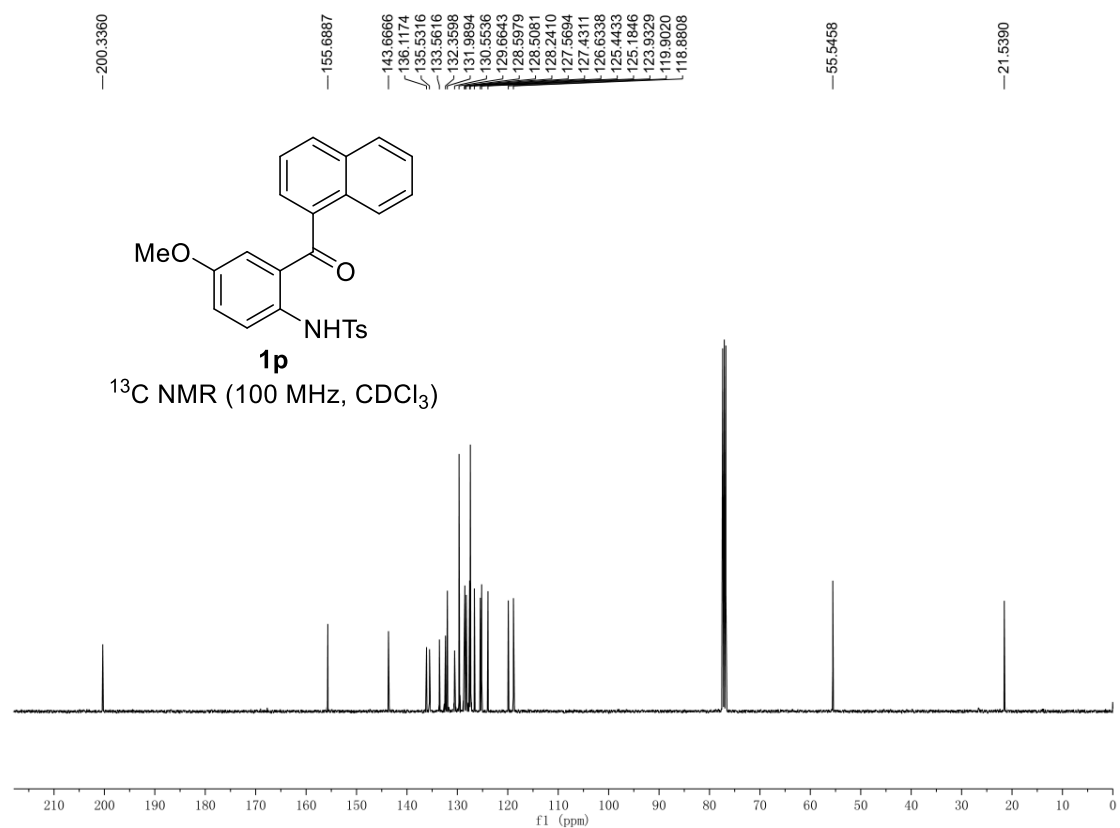

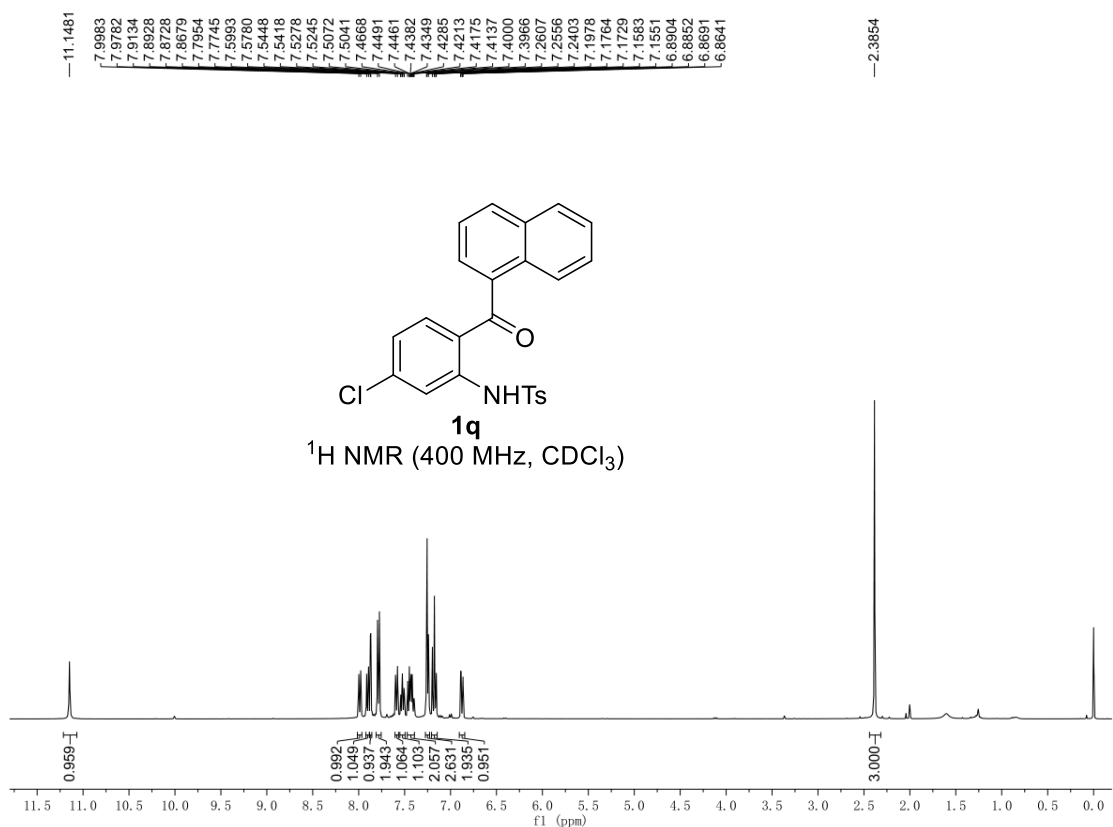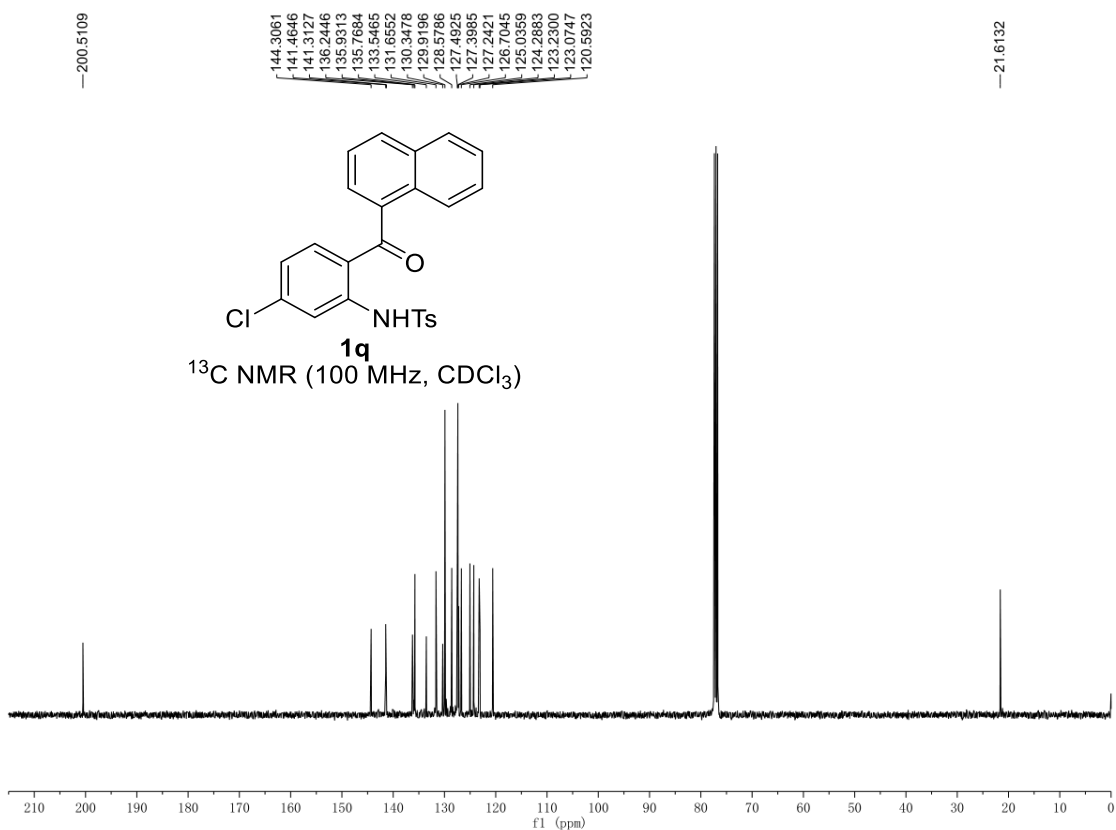

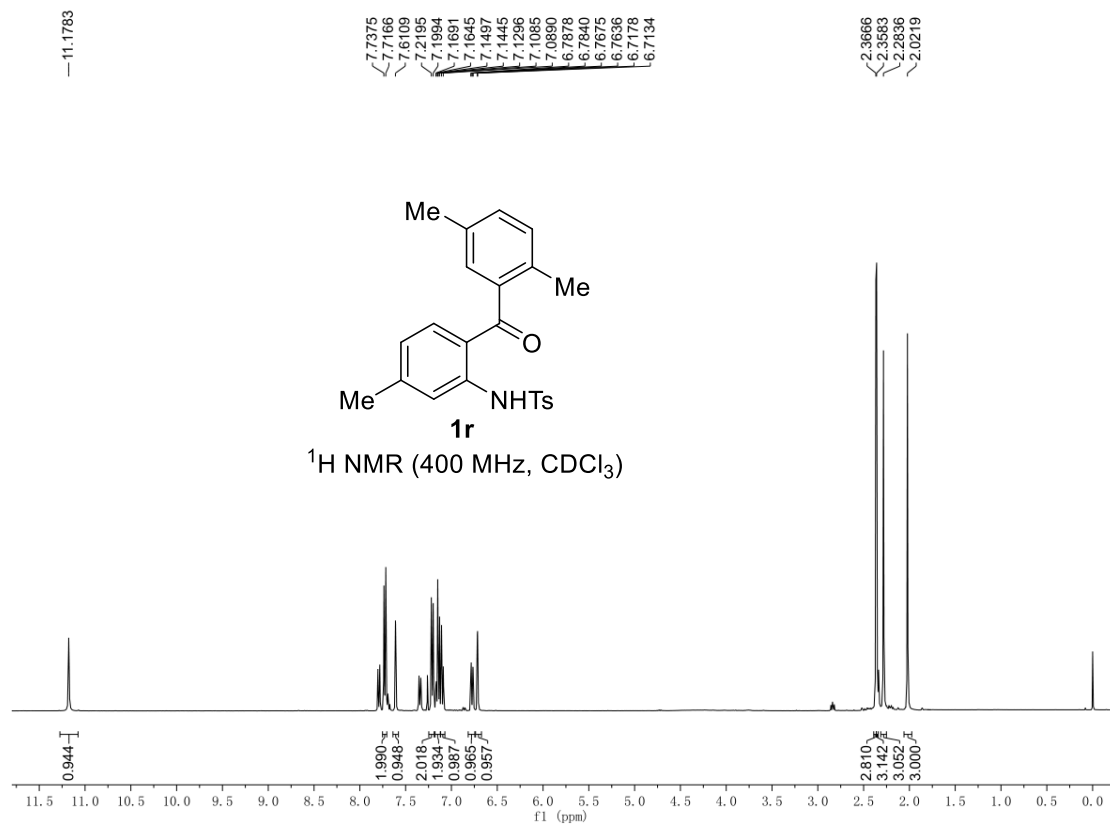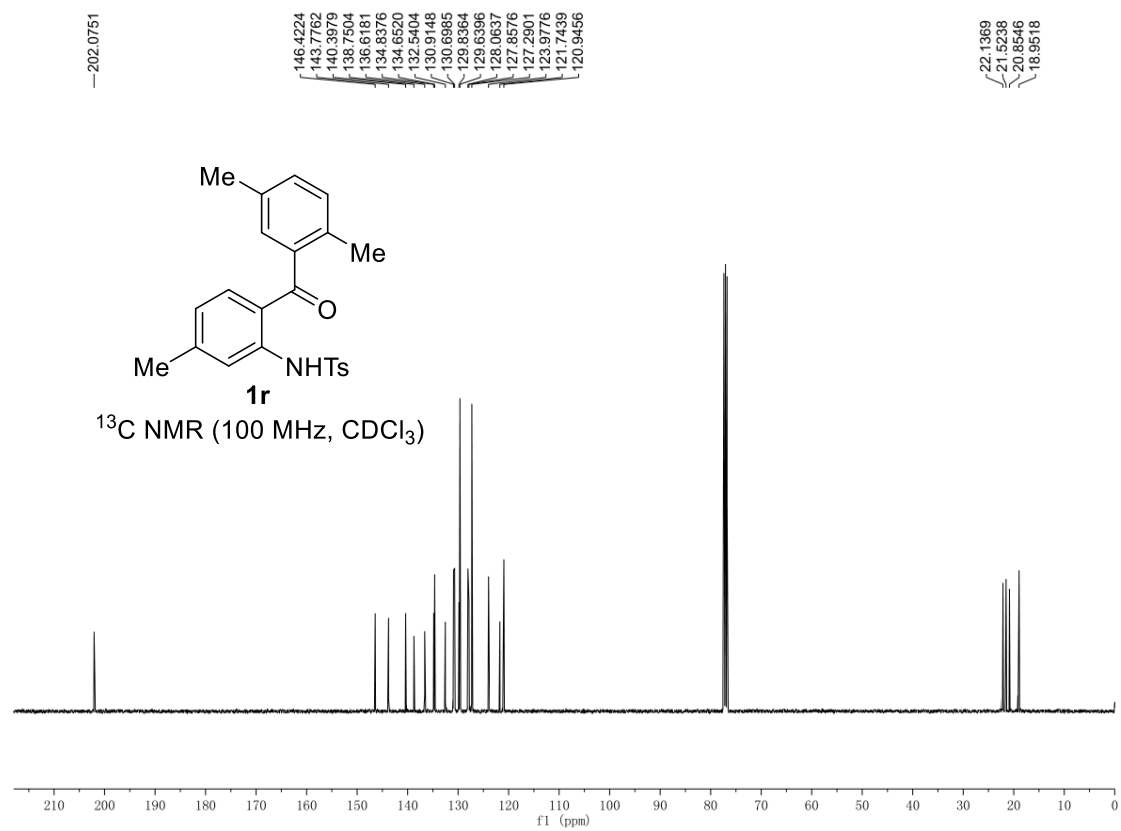

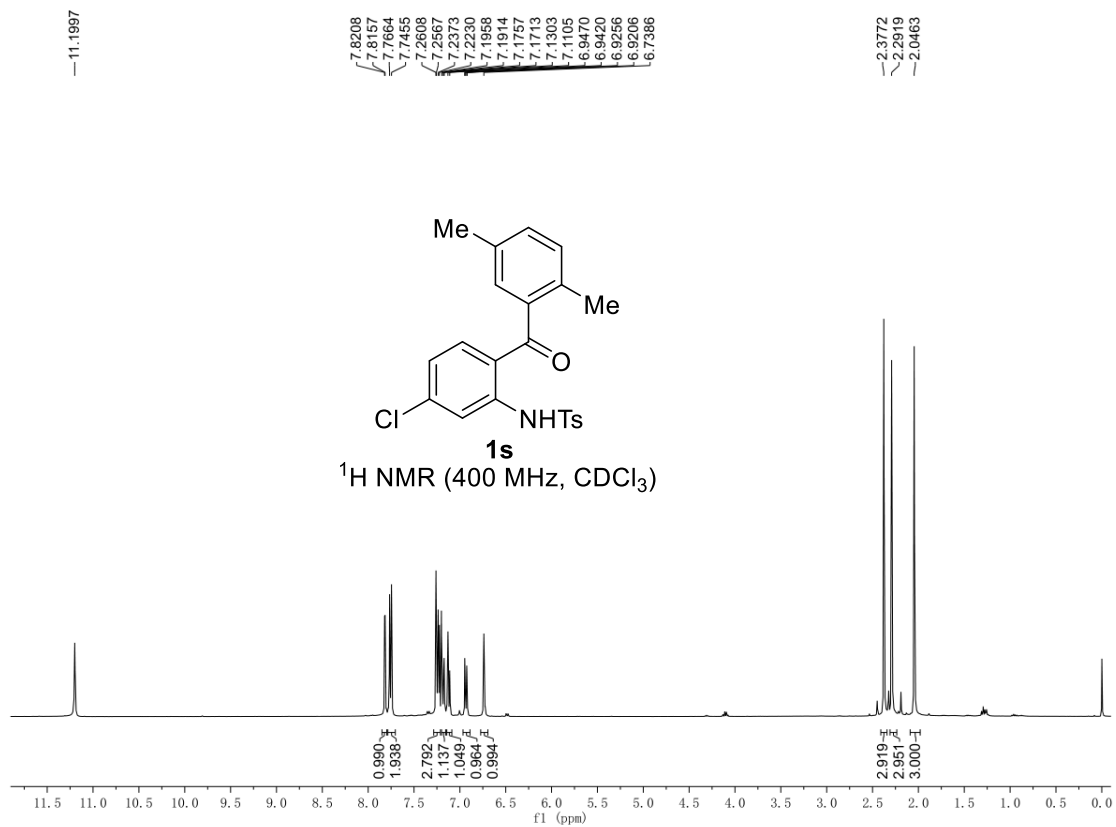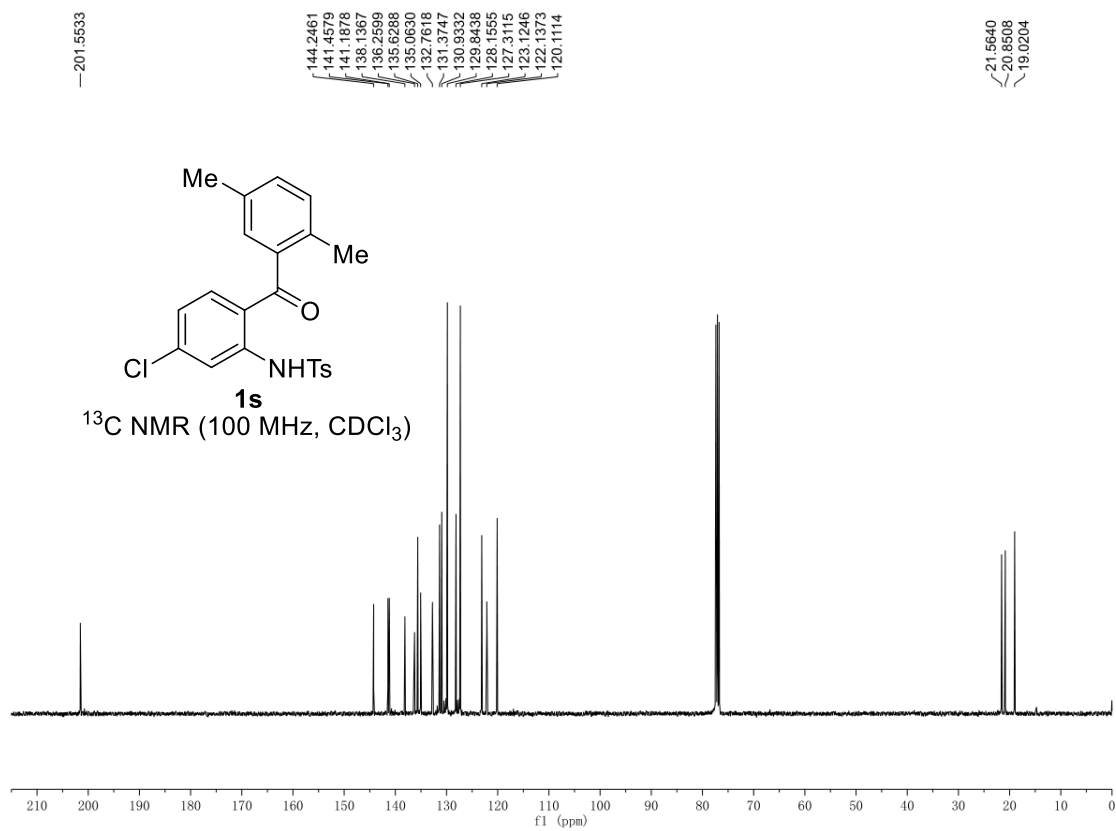

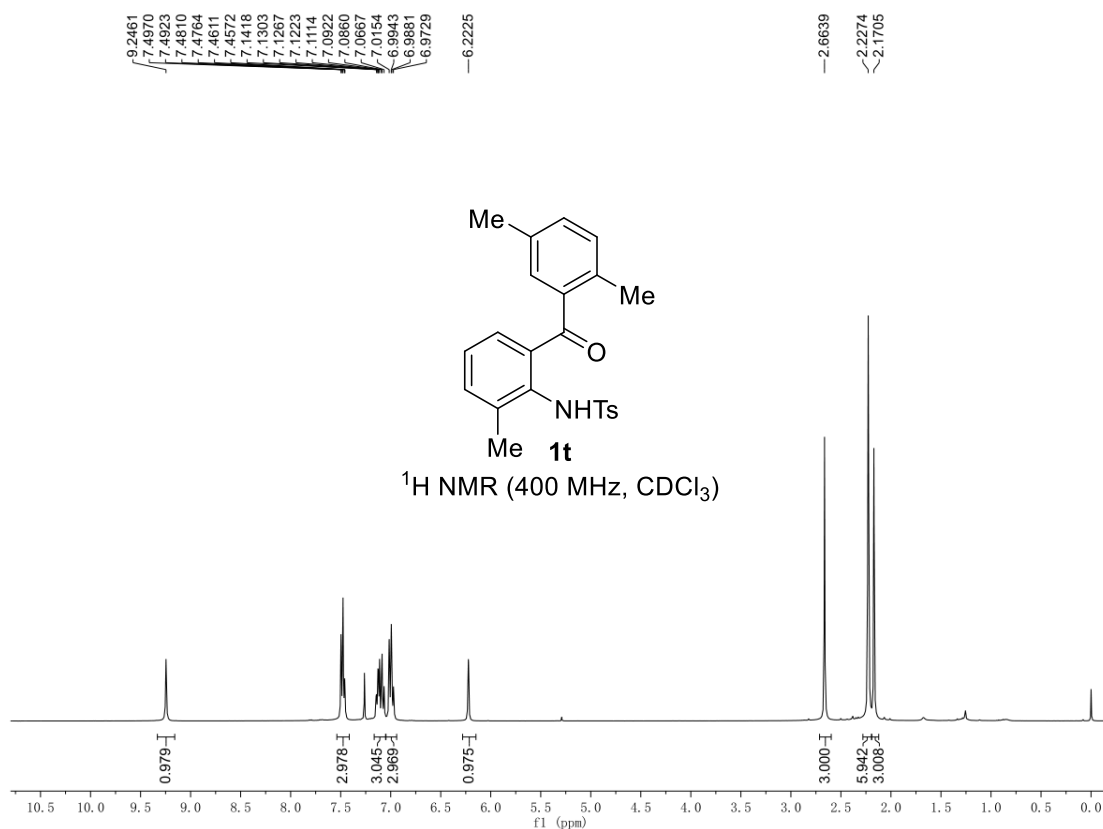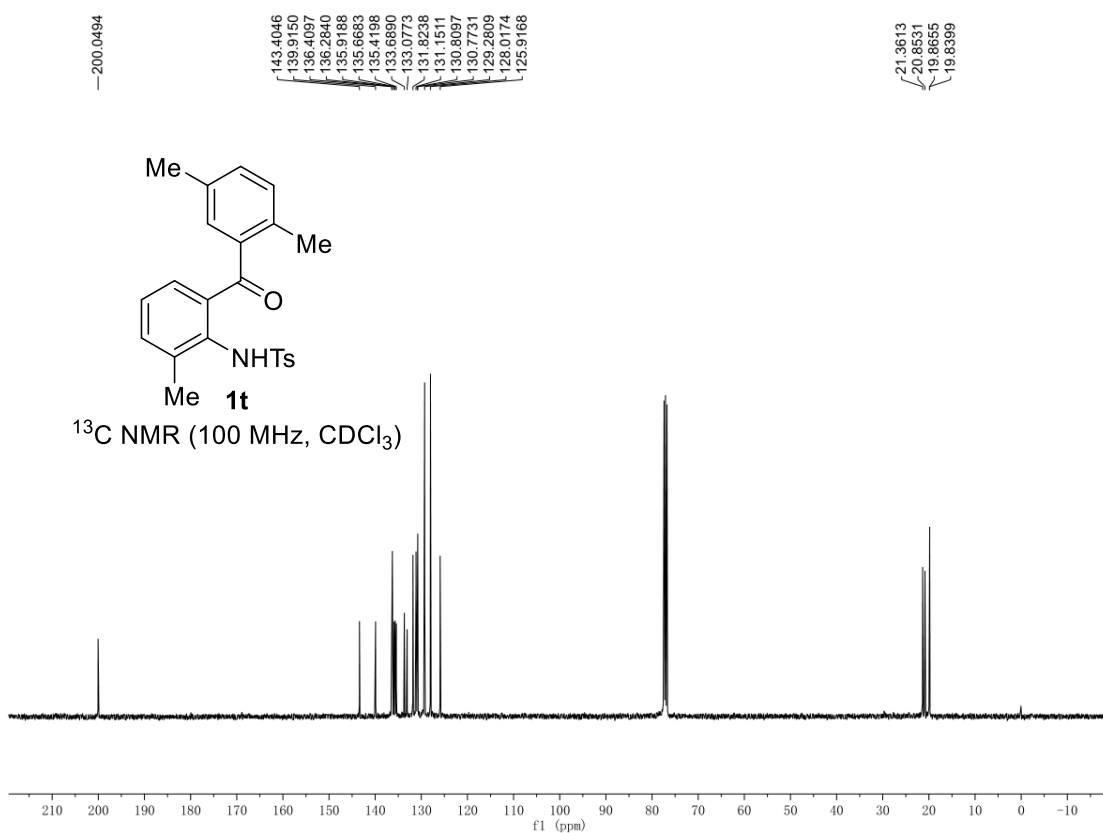

## NMR Spectra of Products

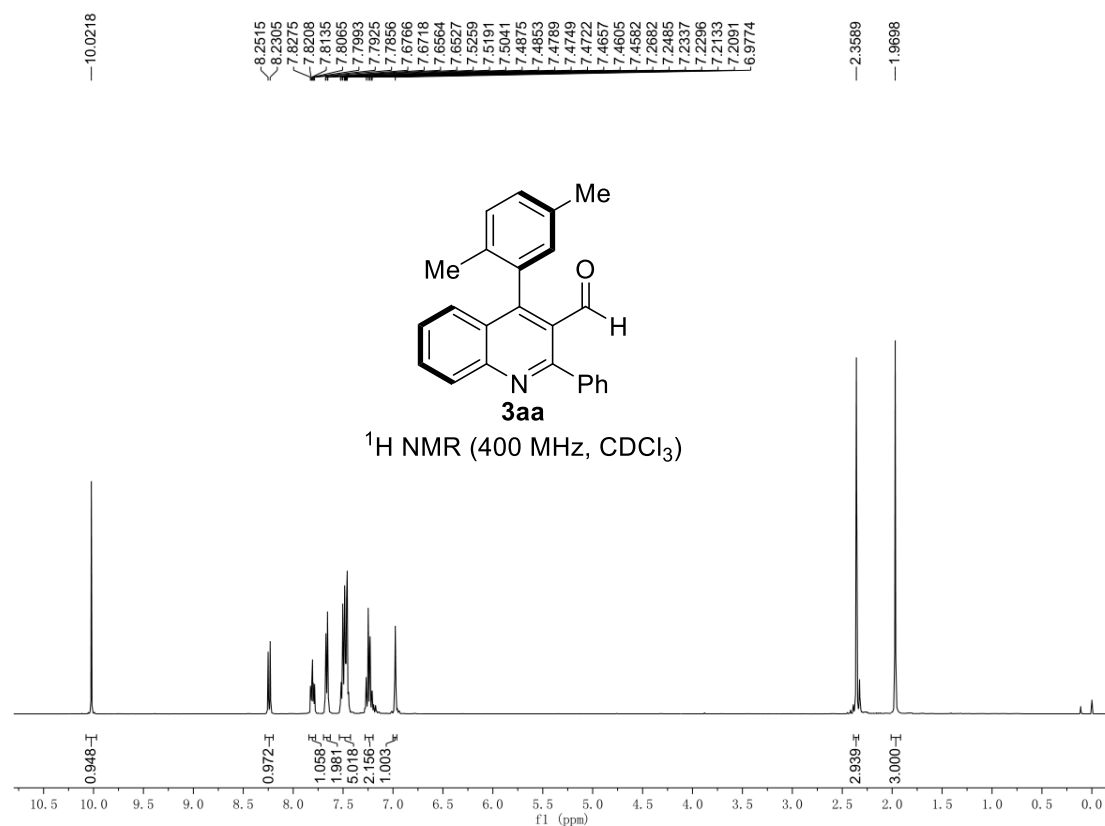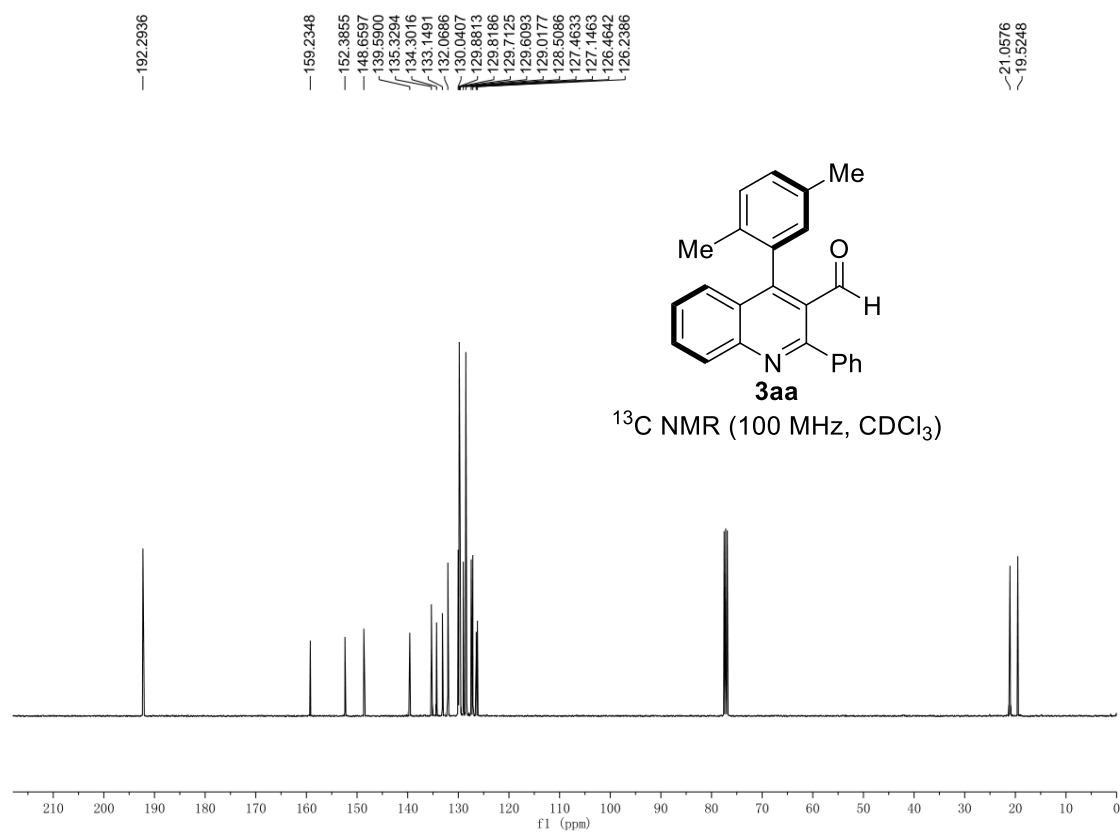

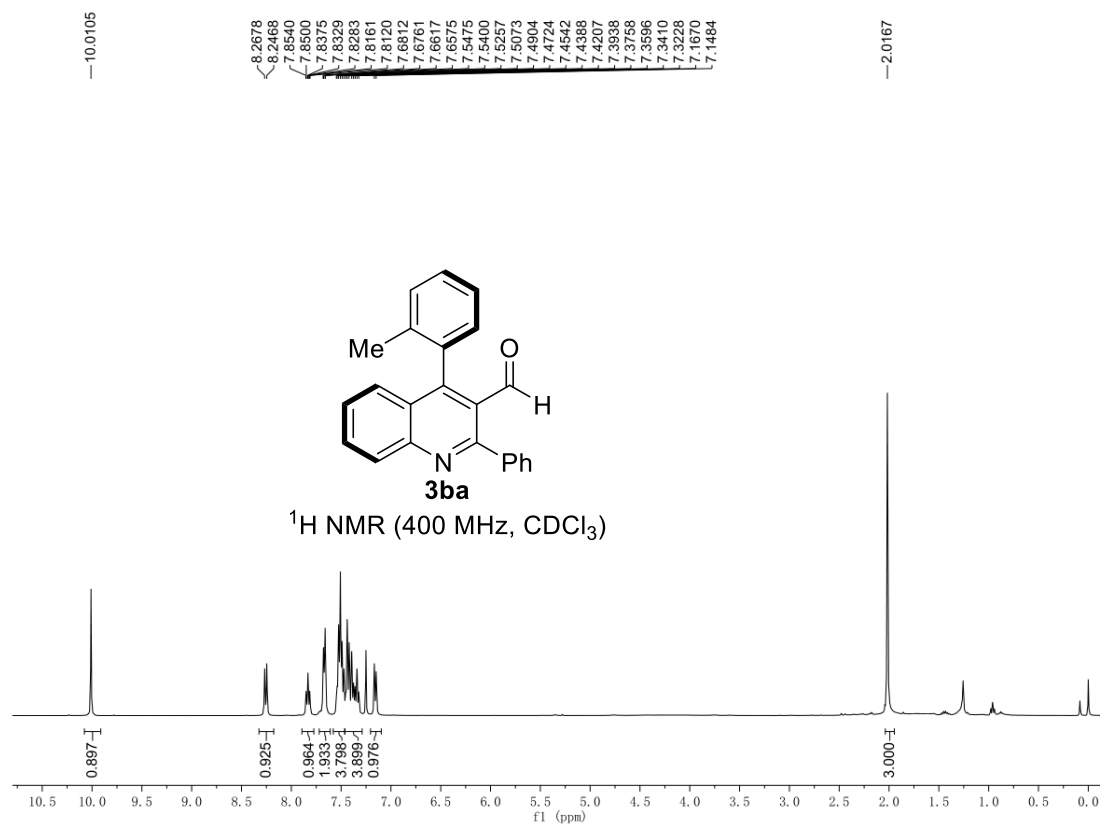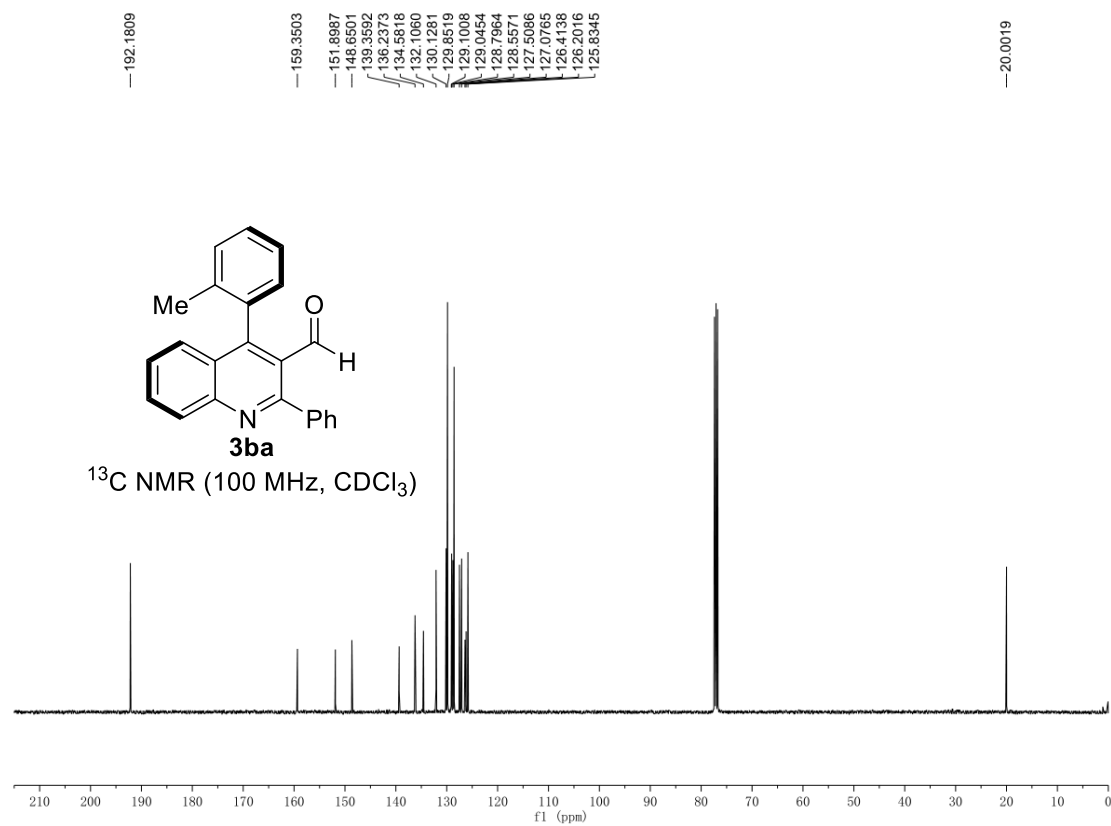



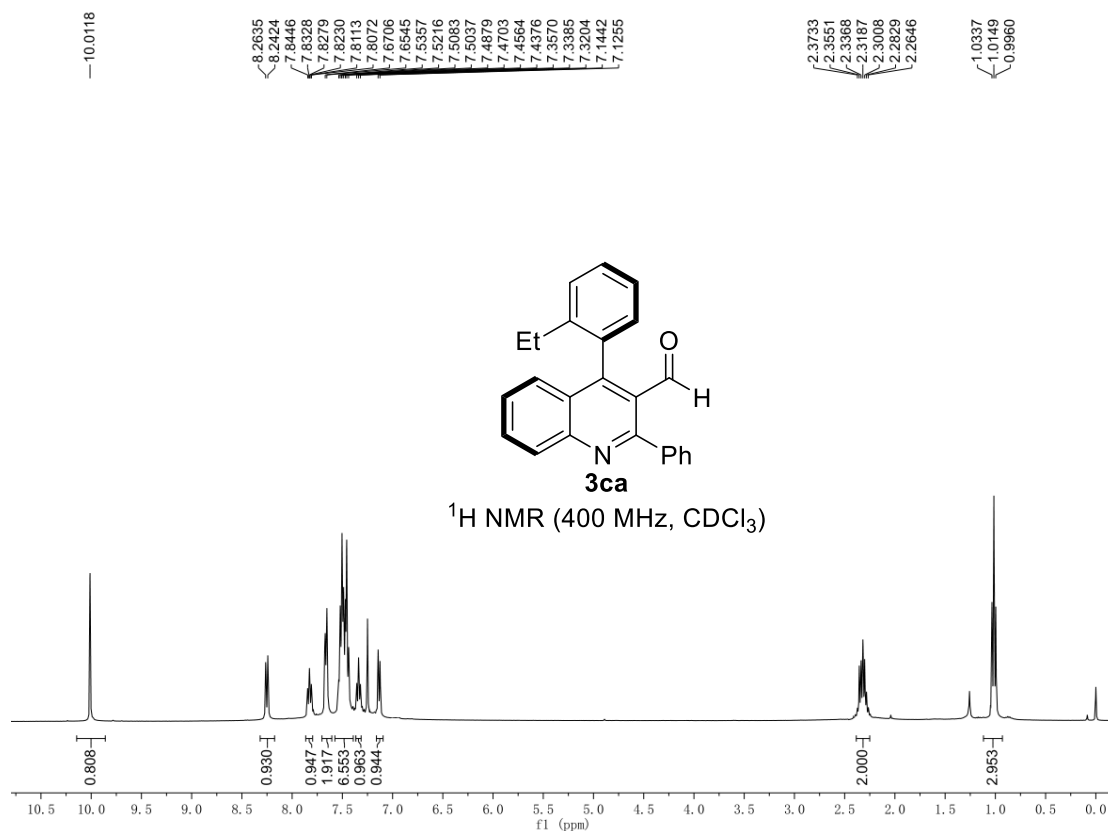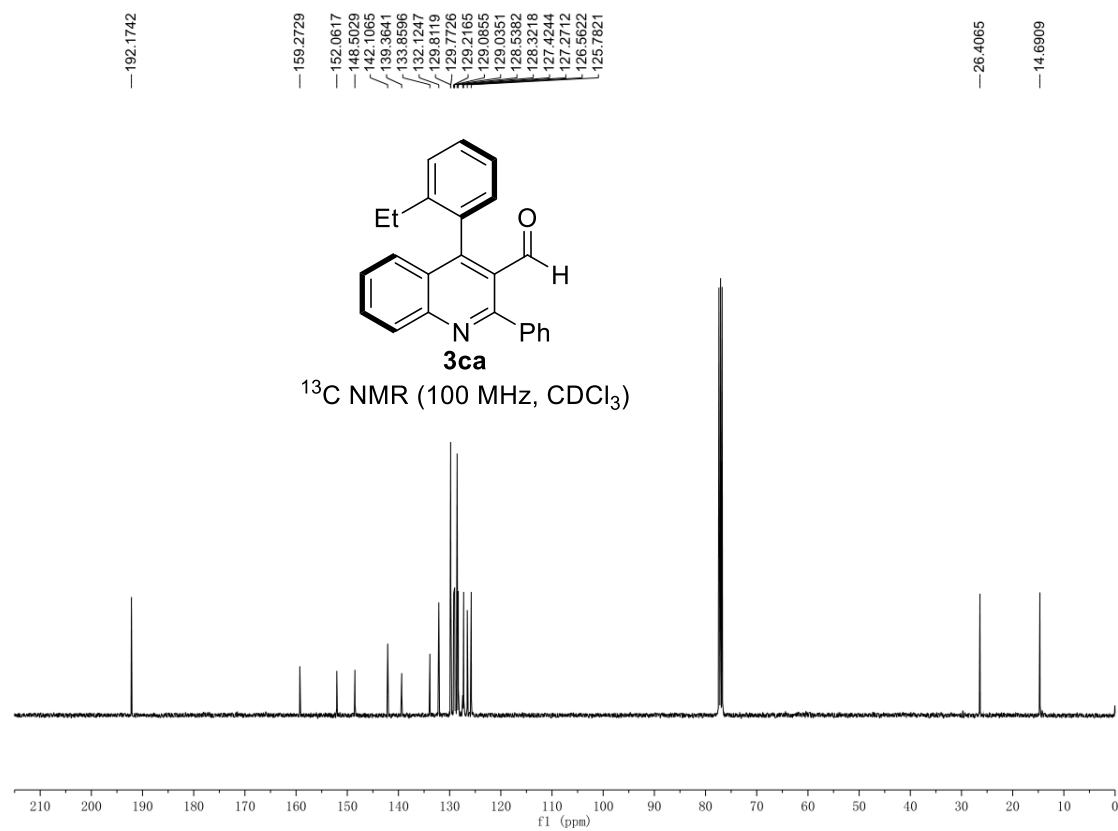

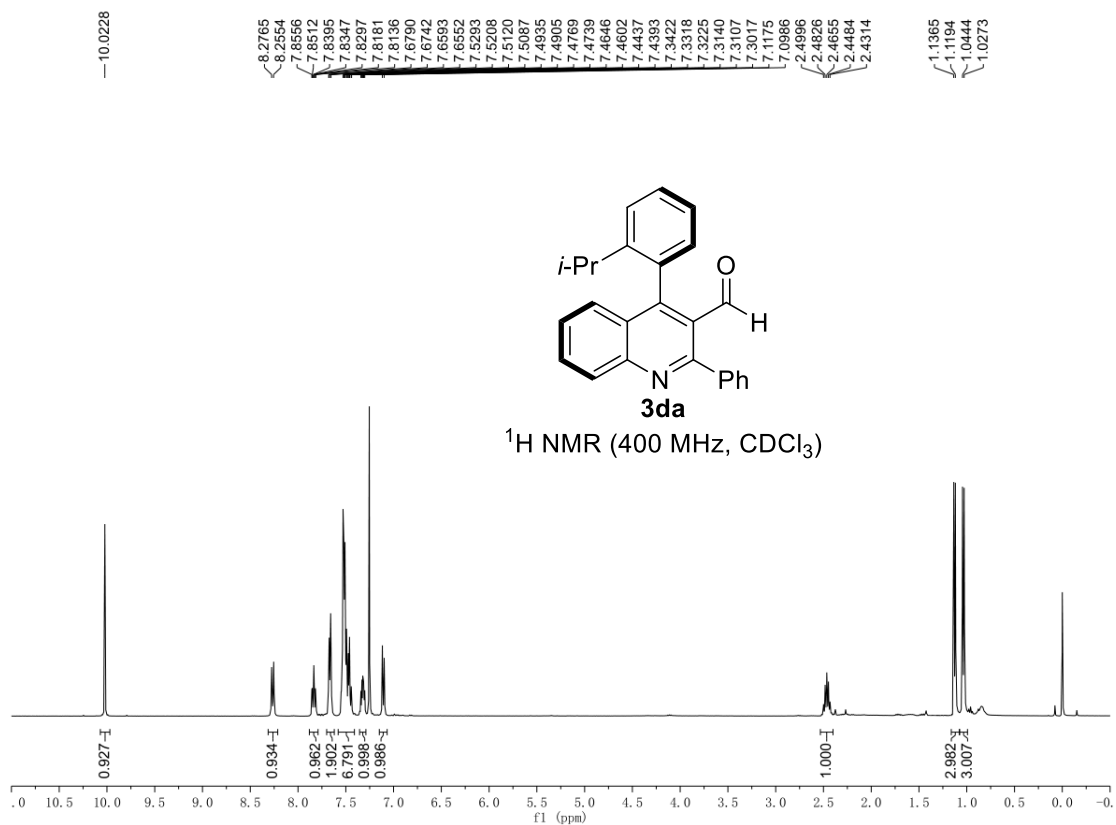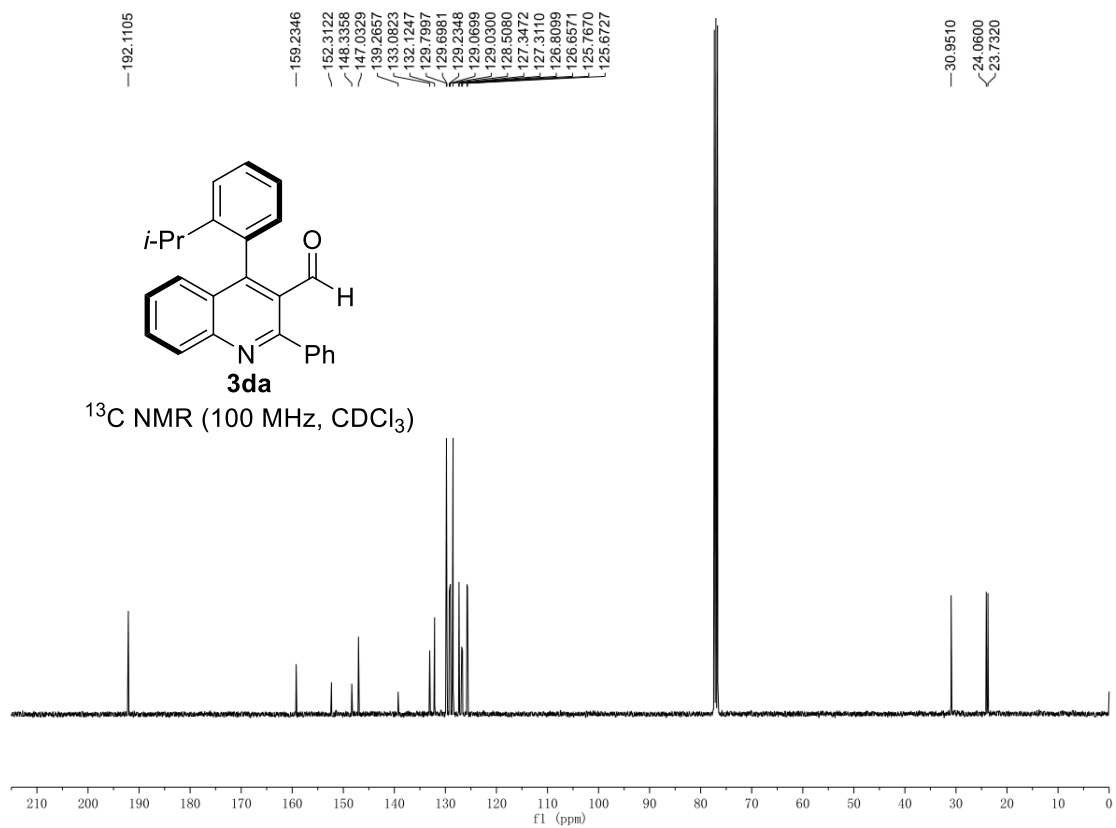

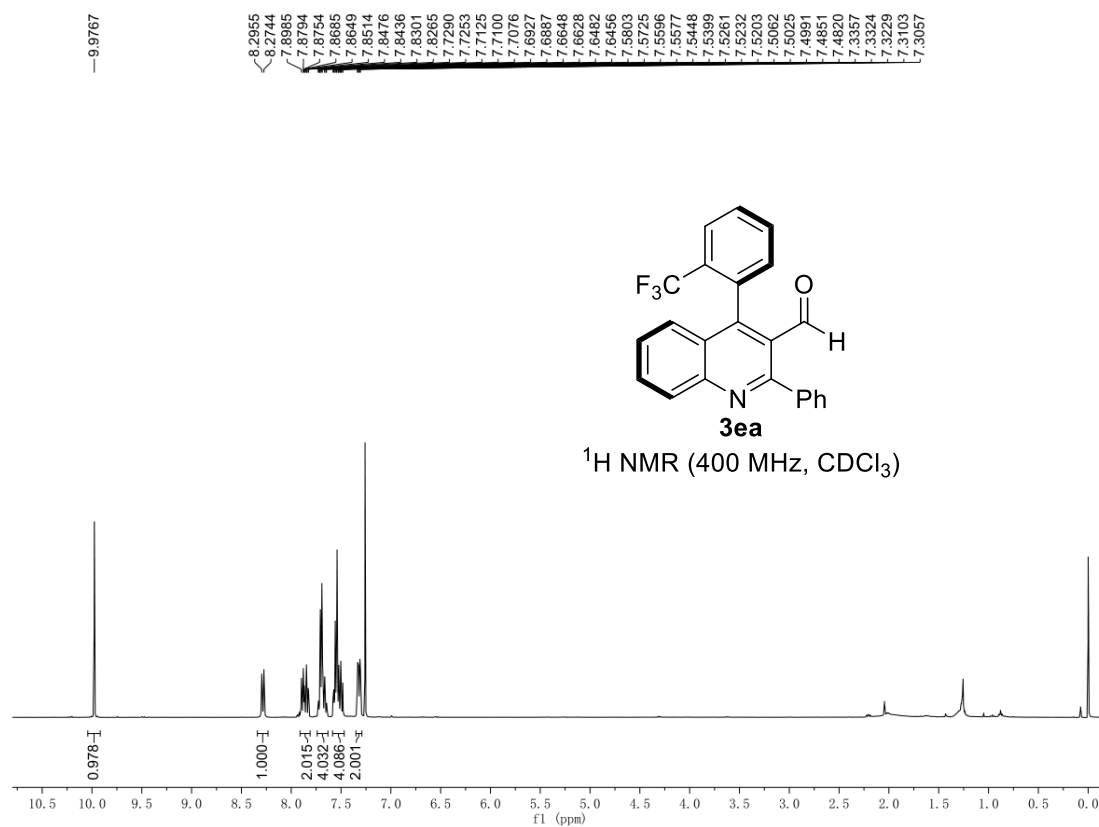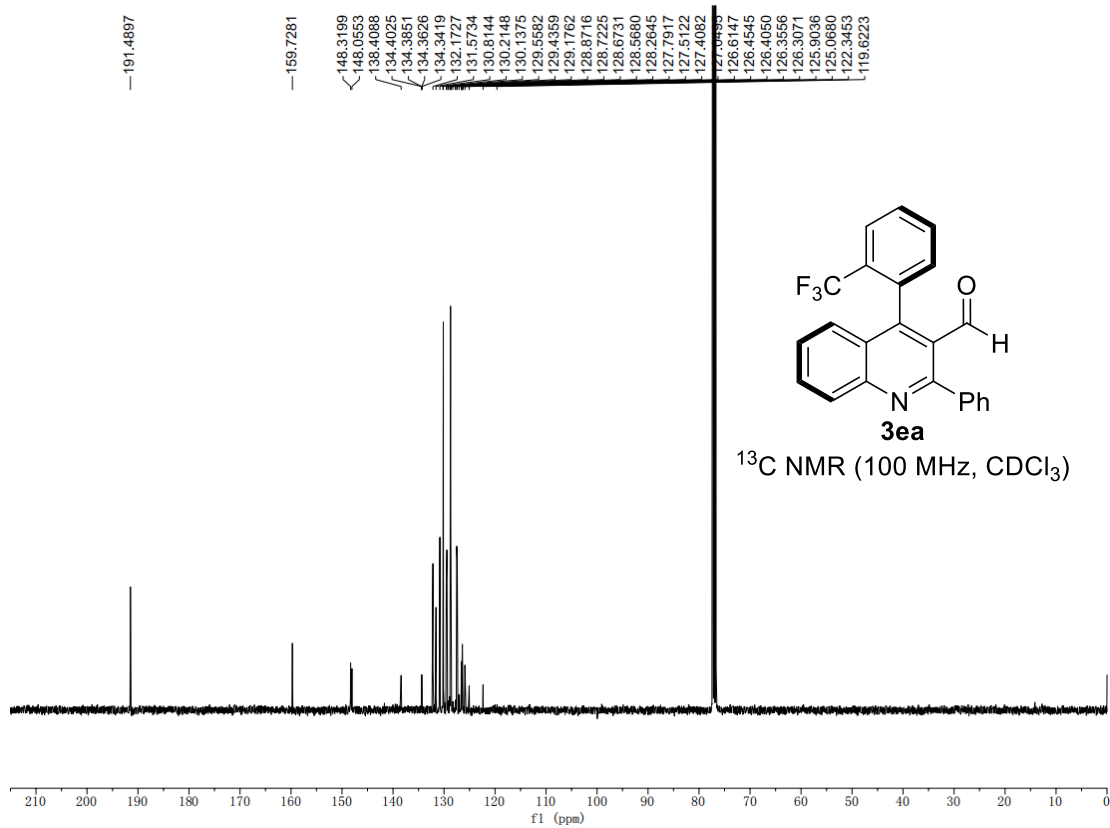

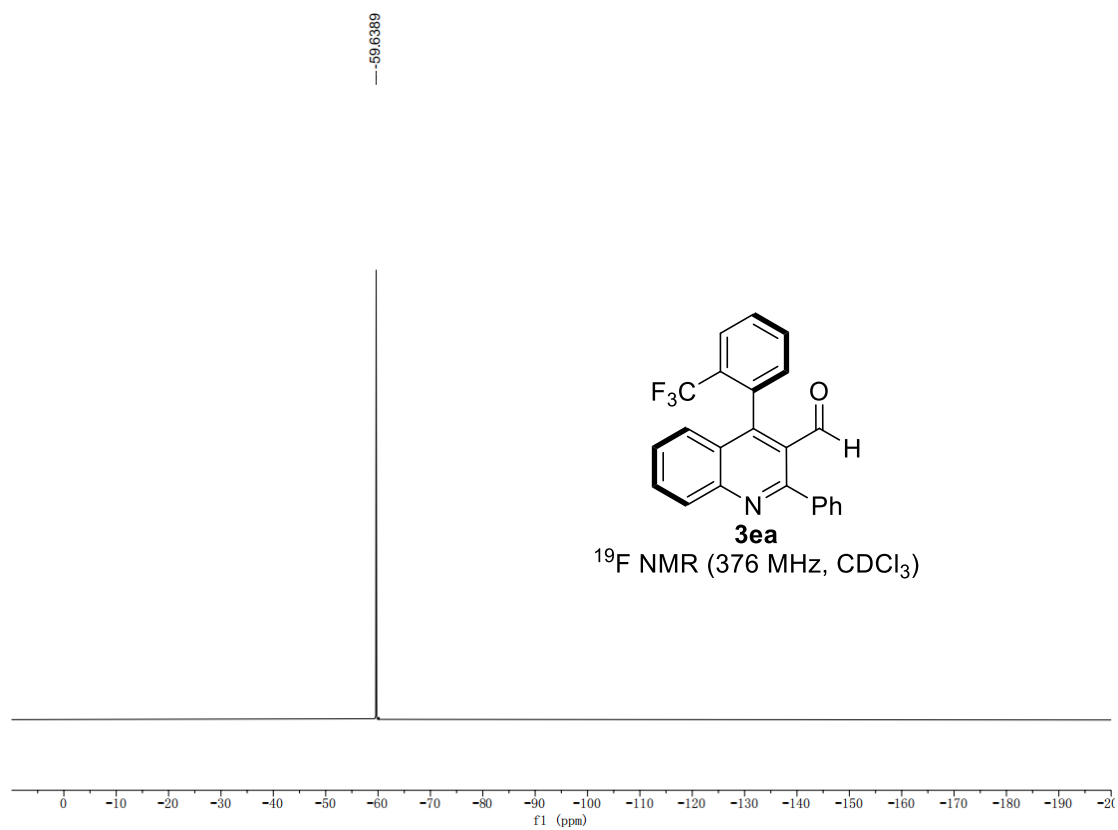

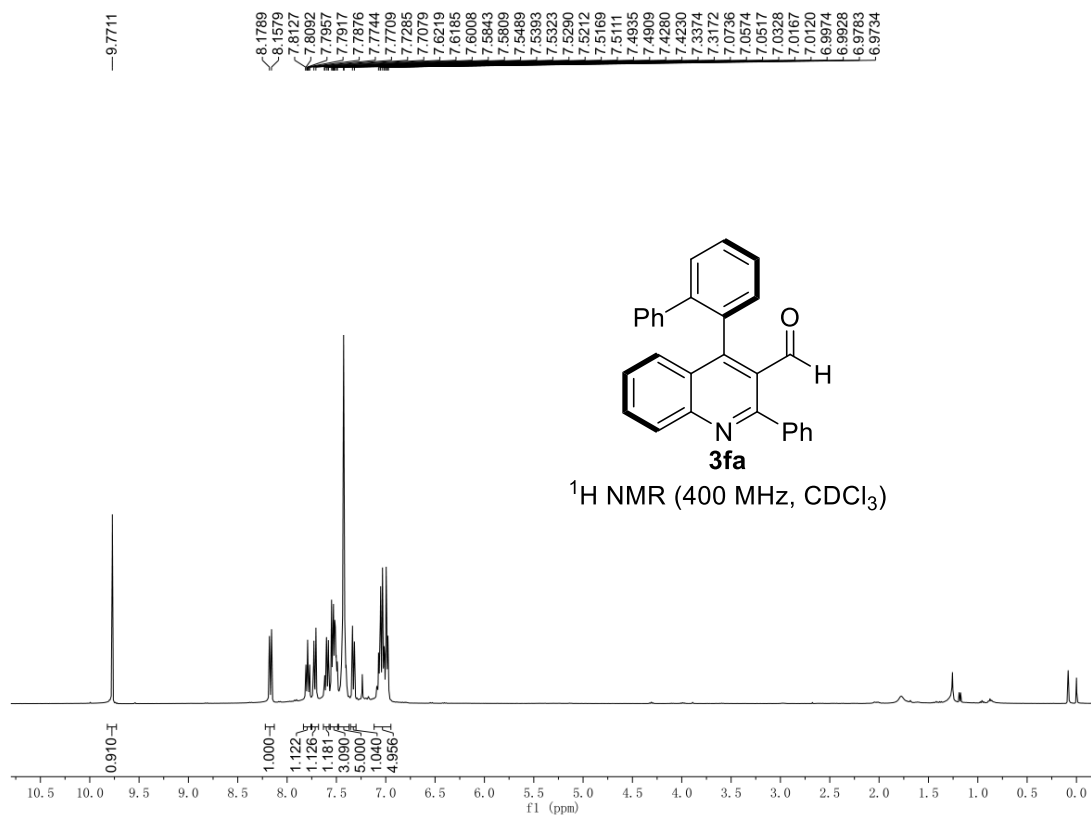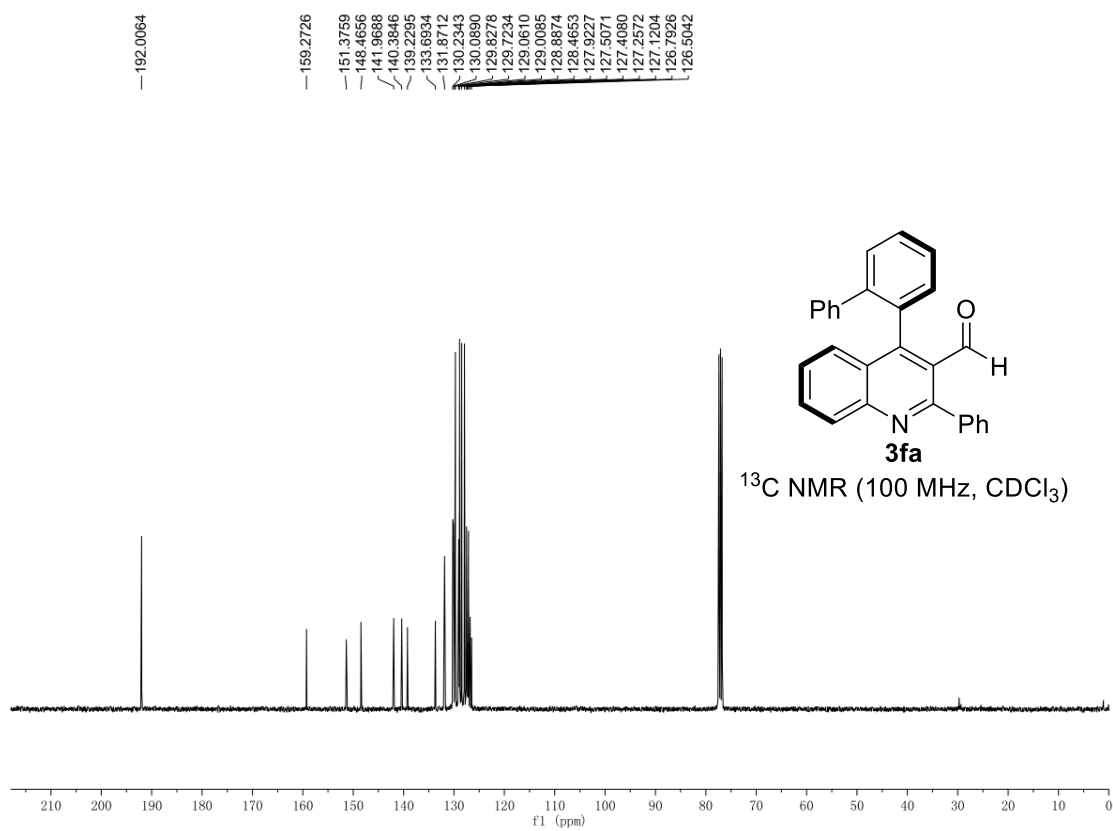

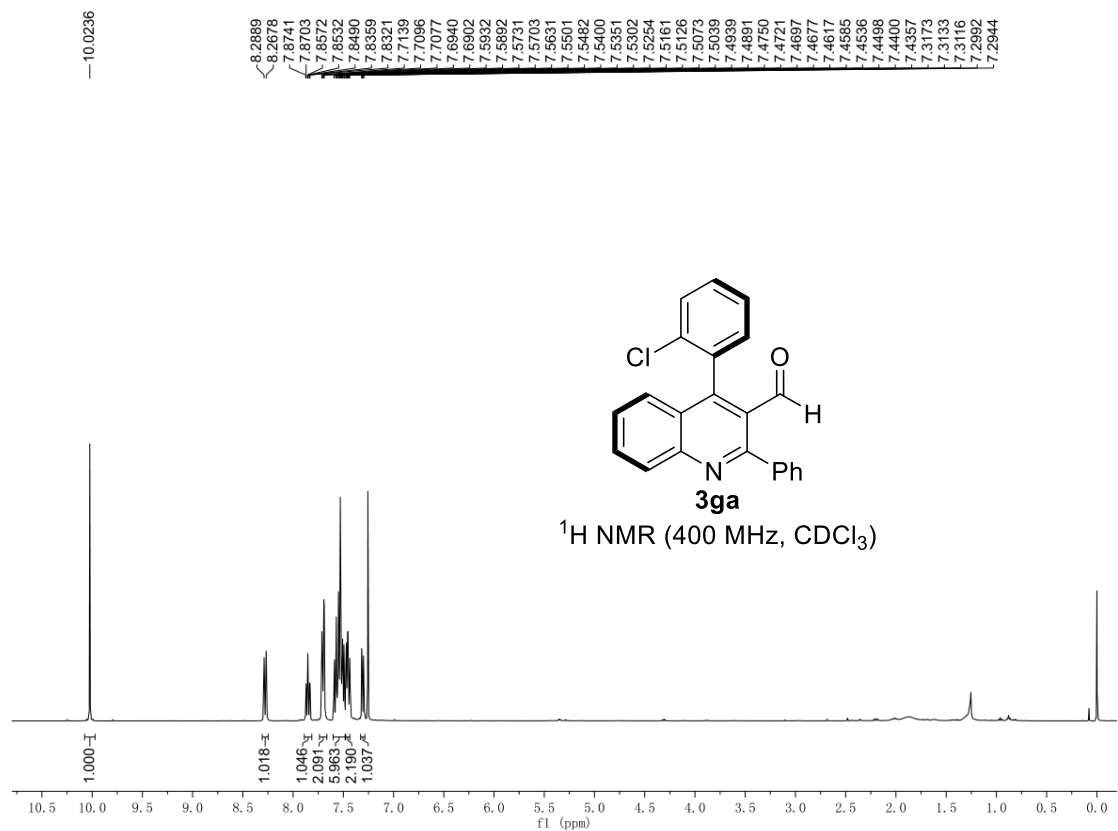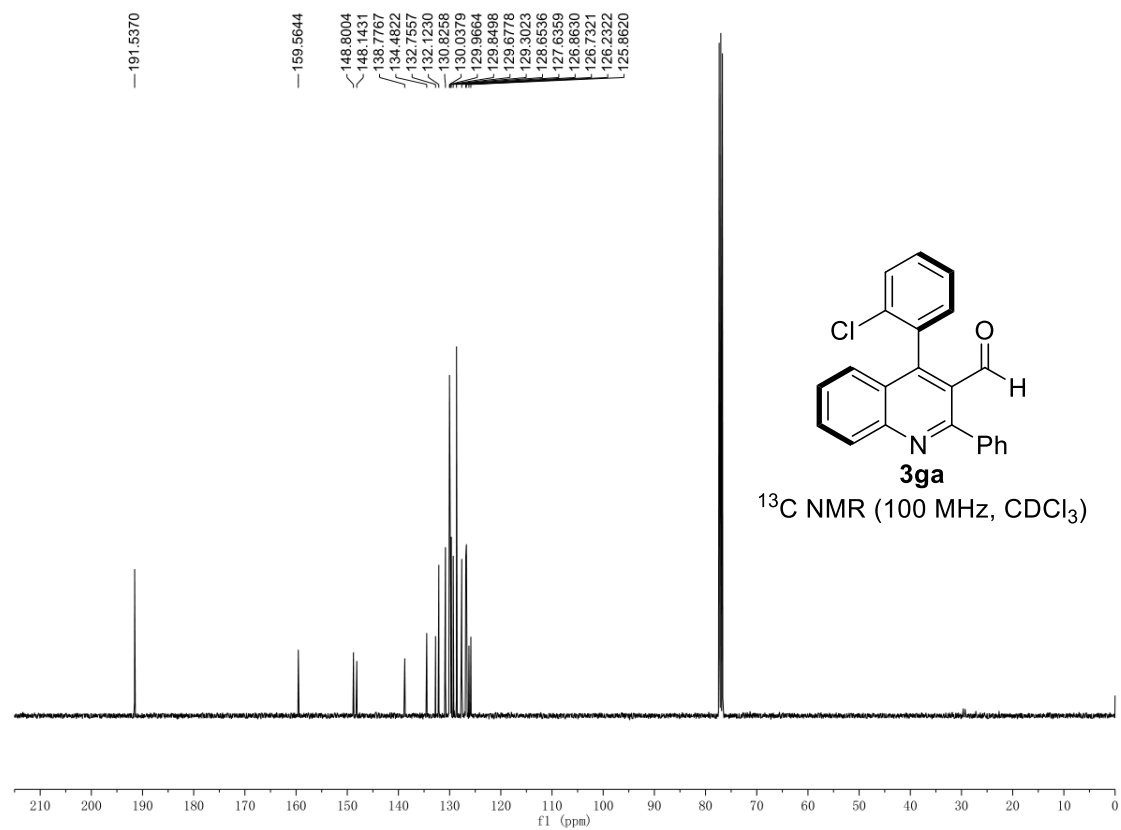

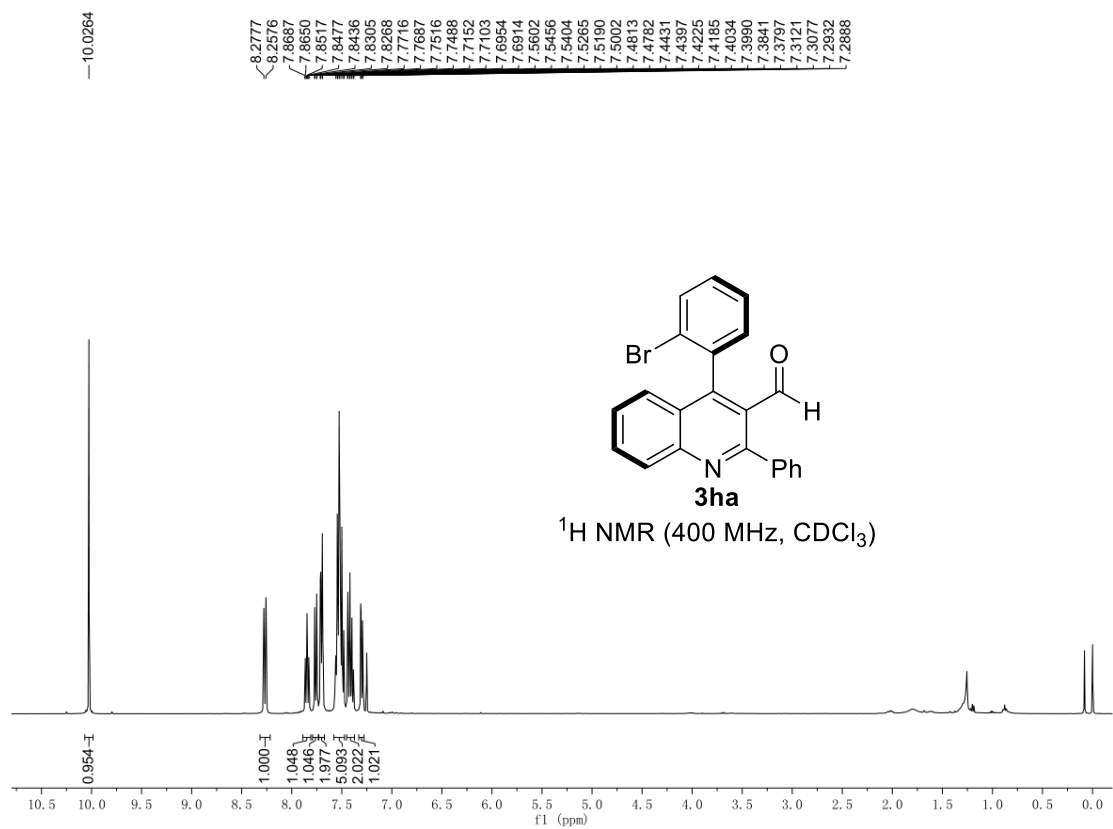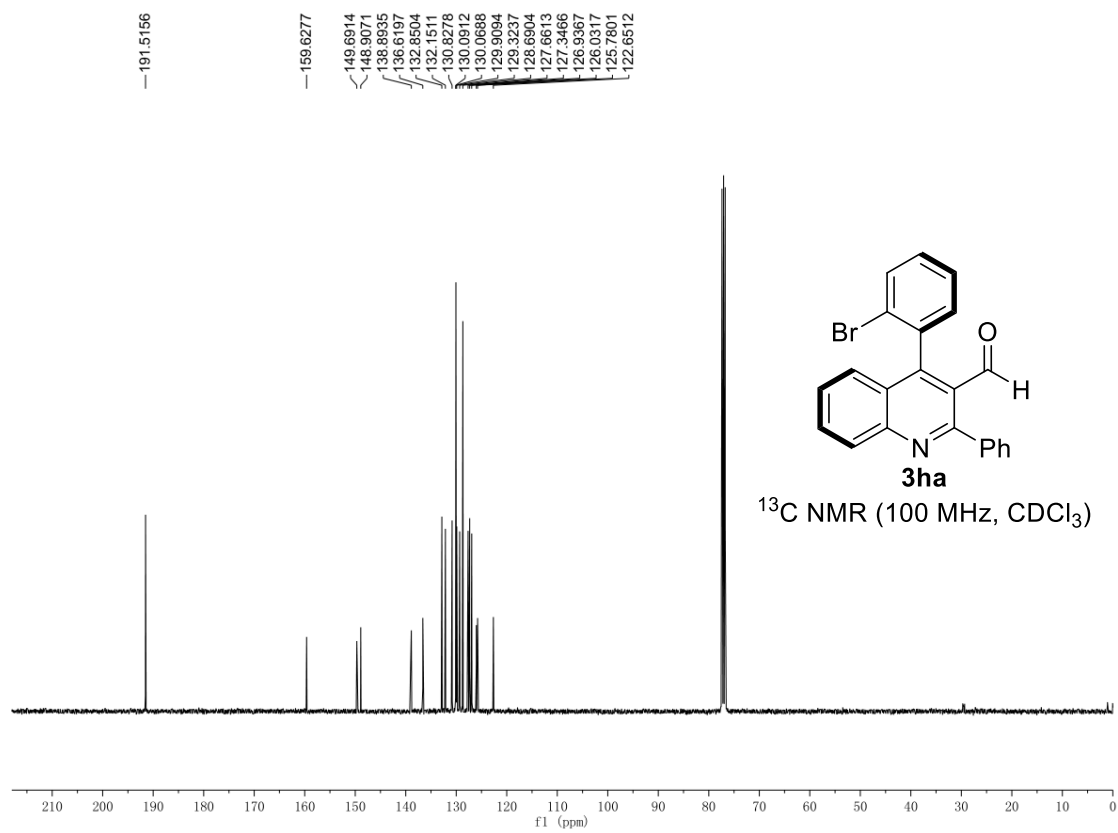





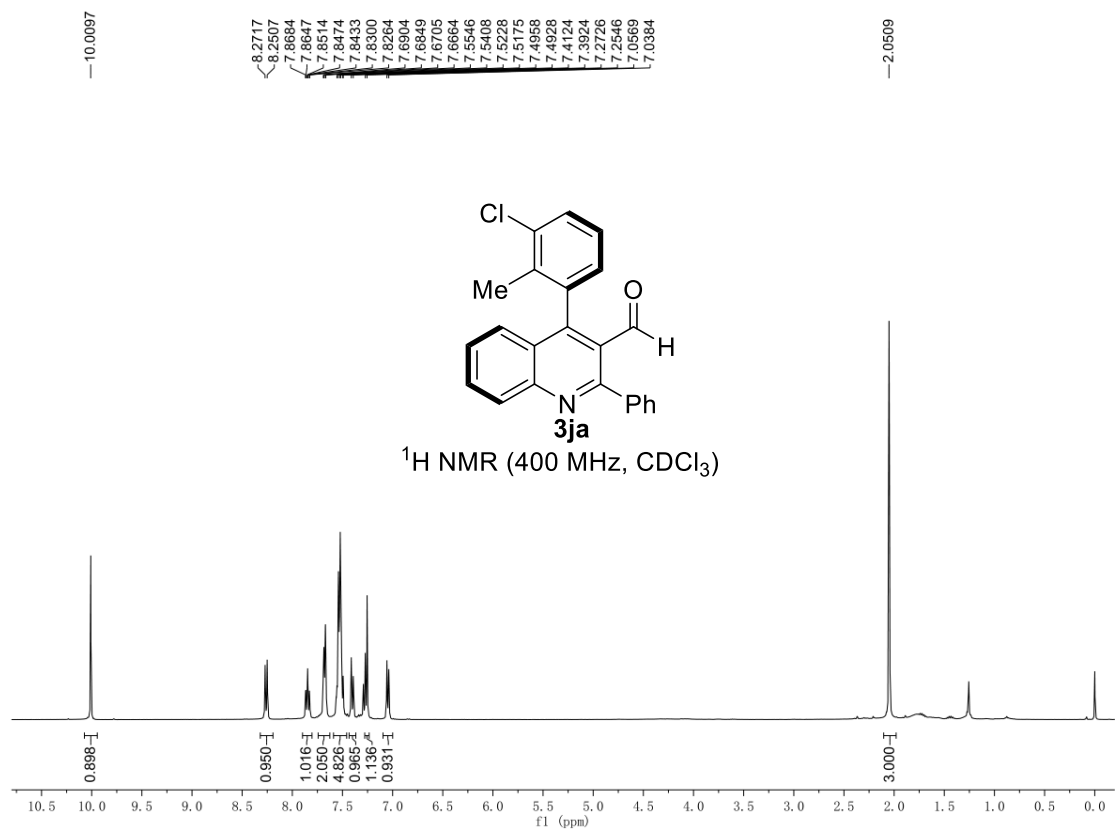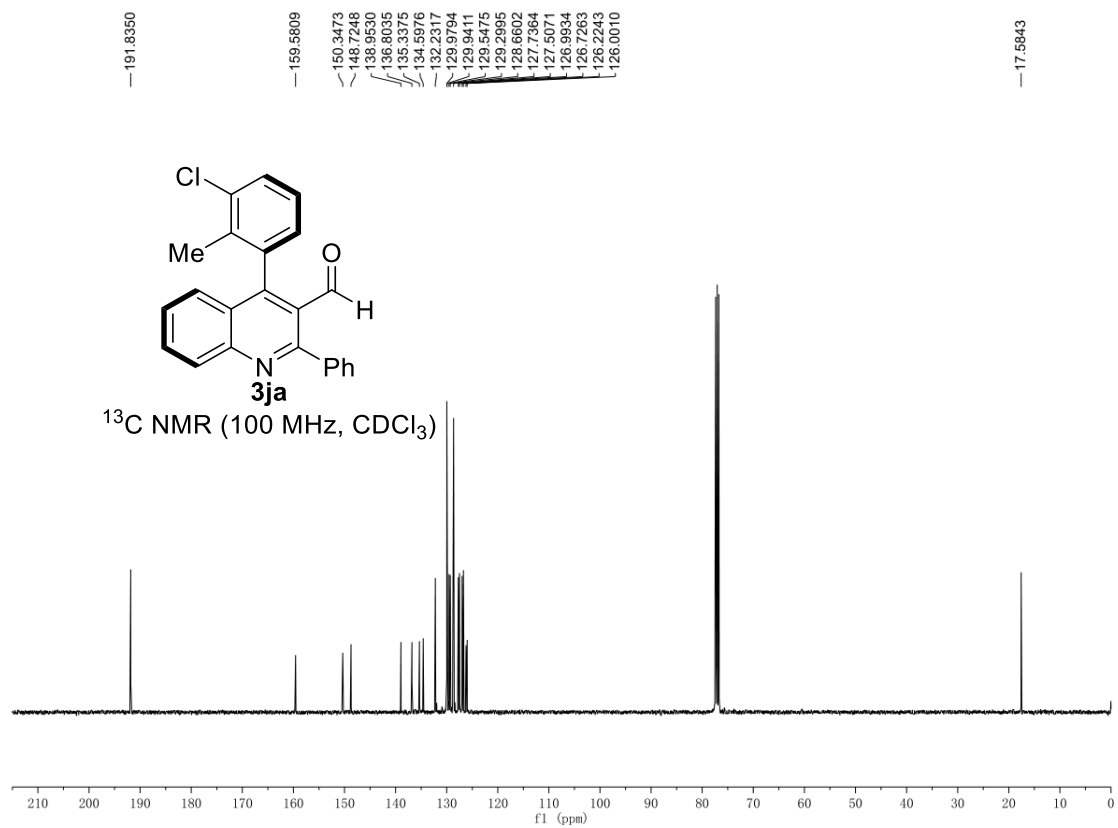

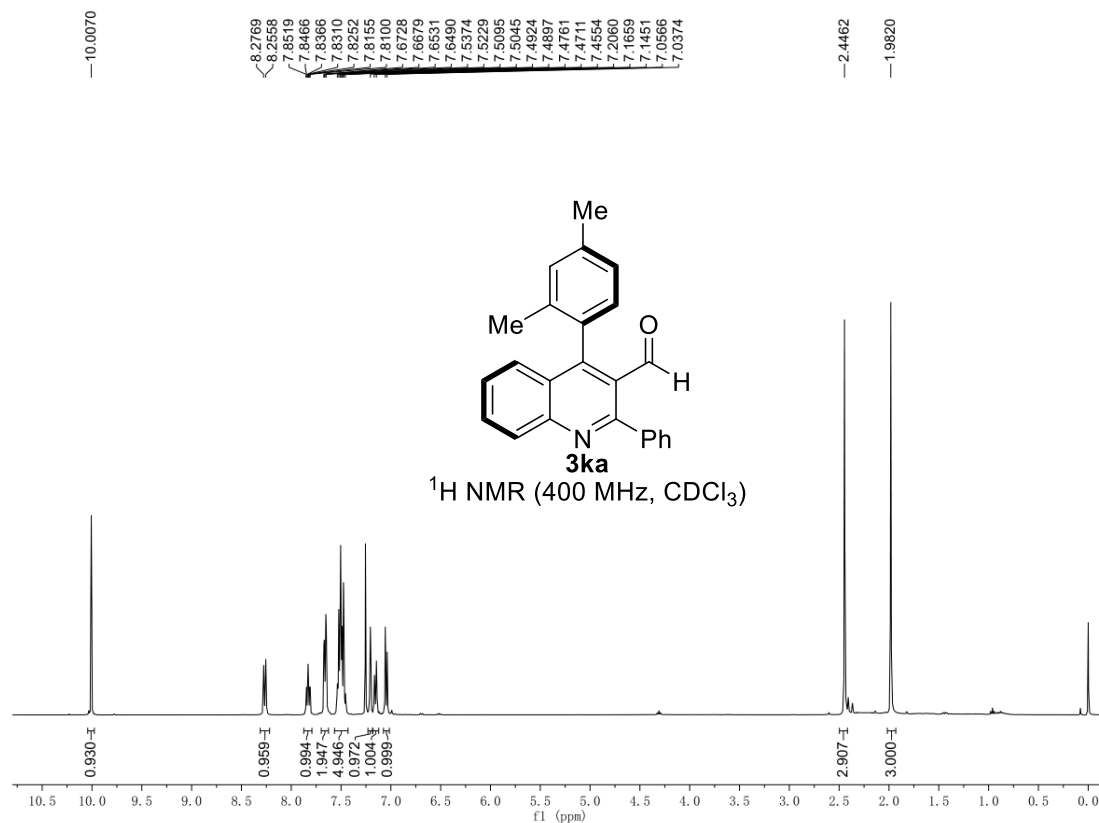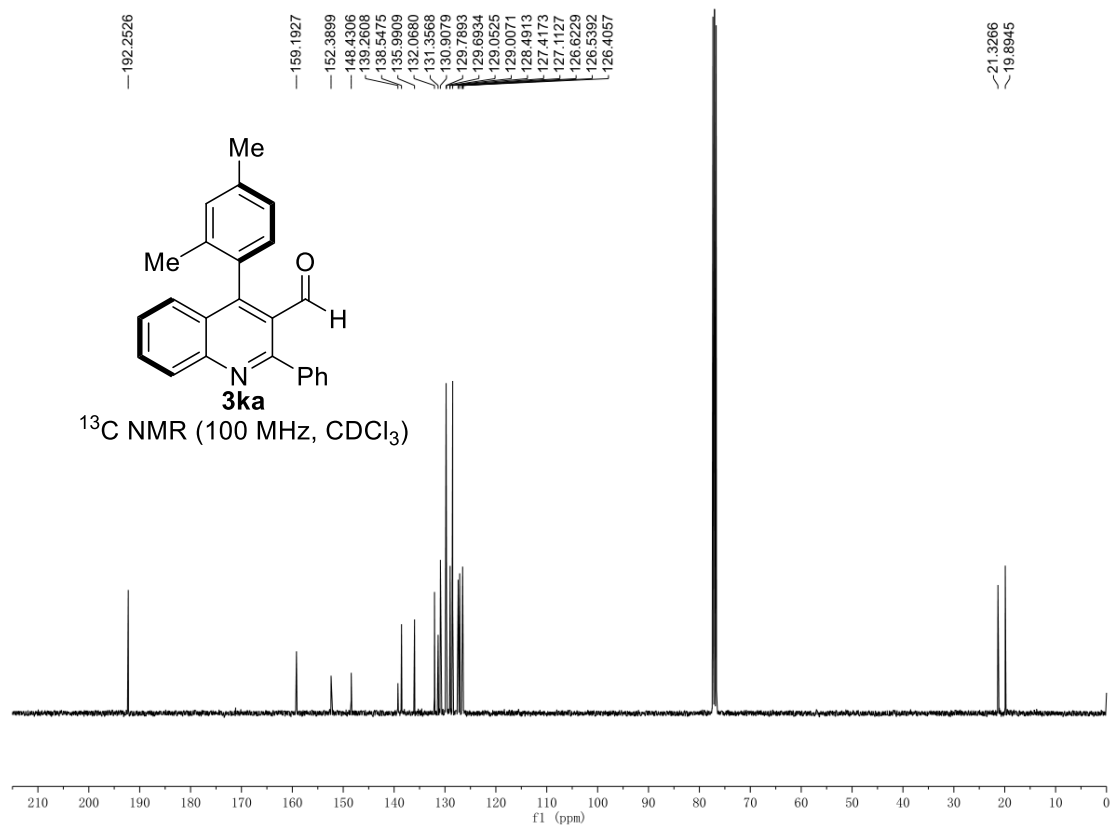

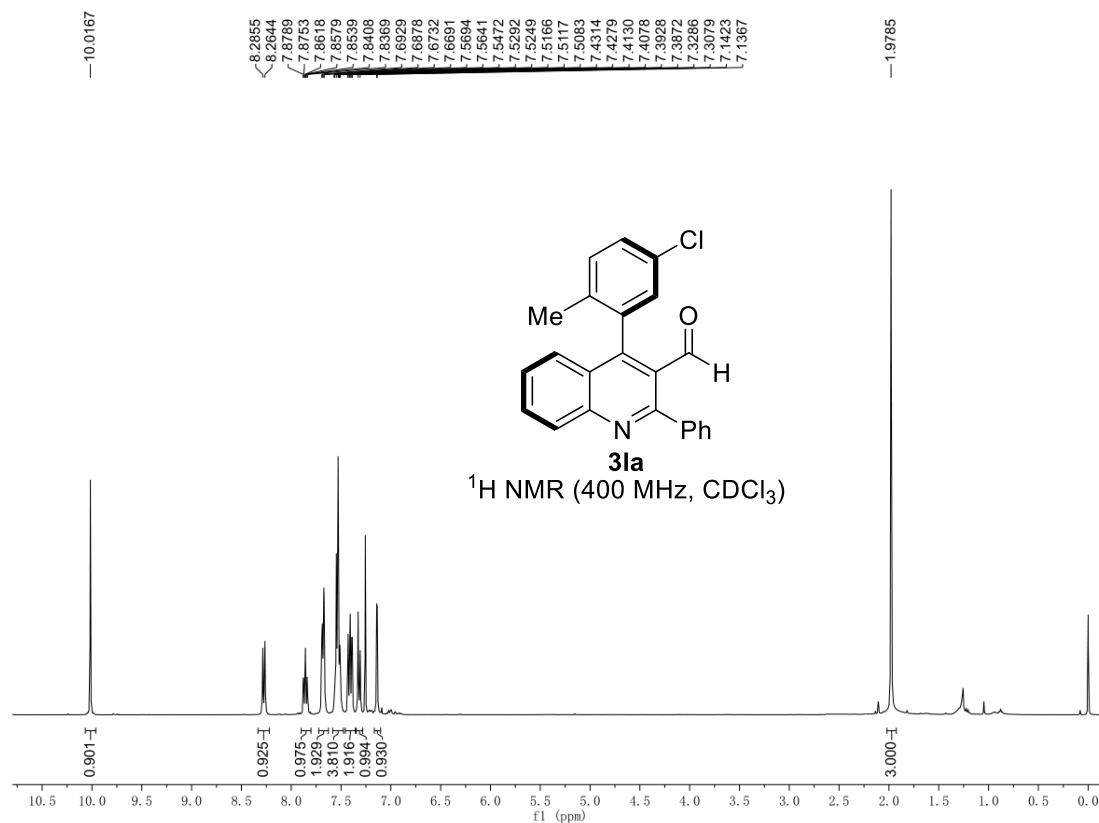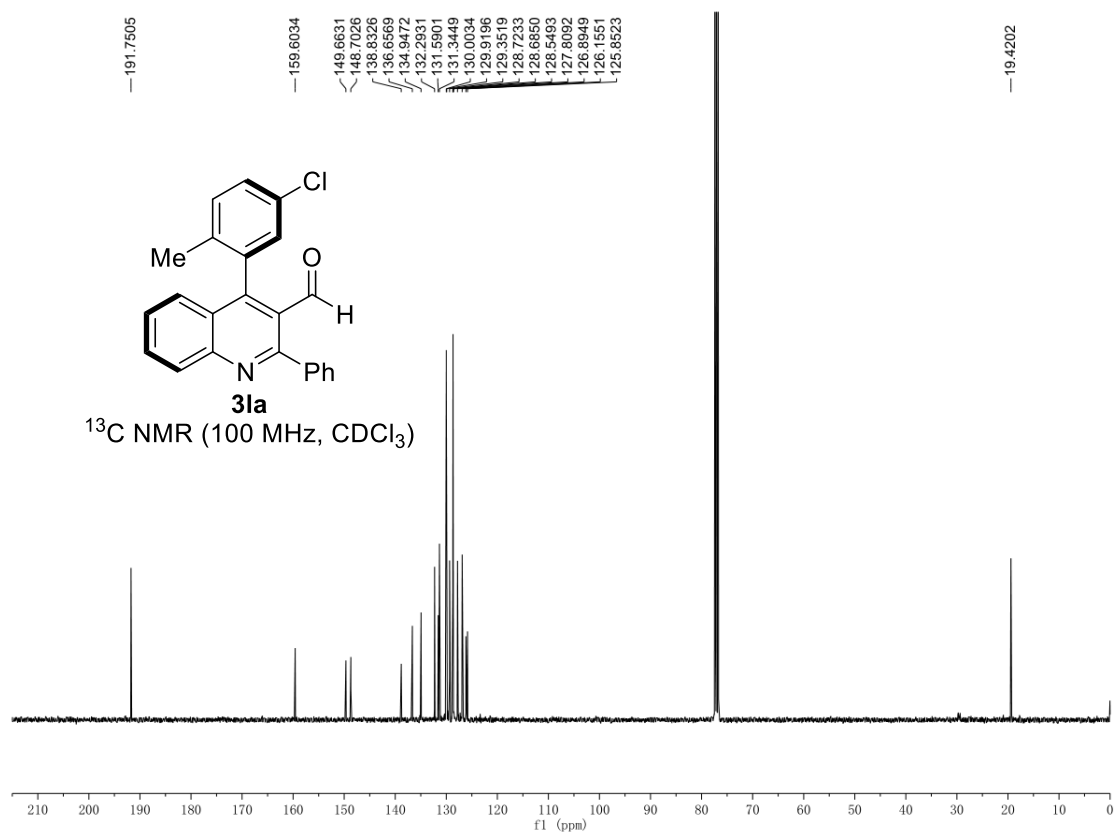

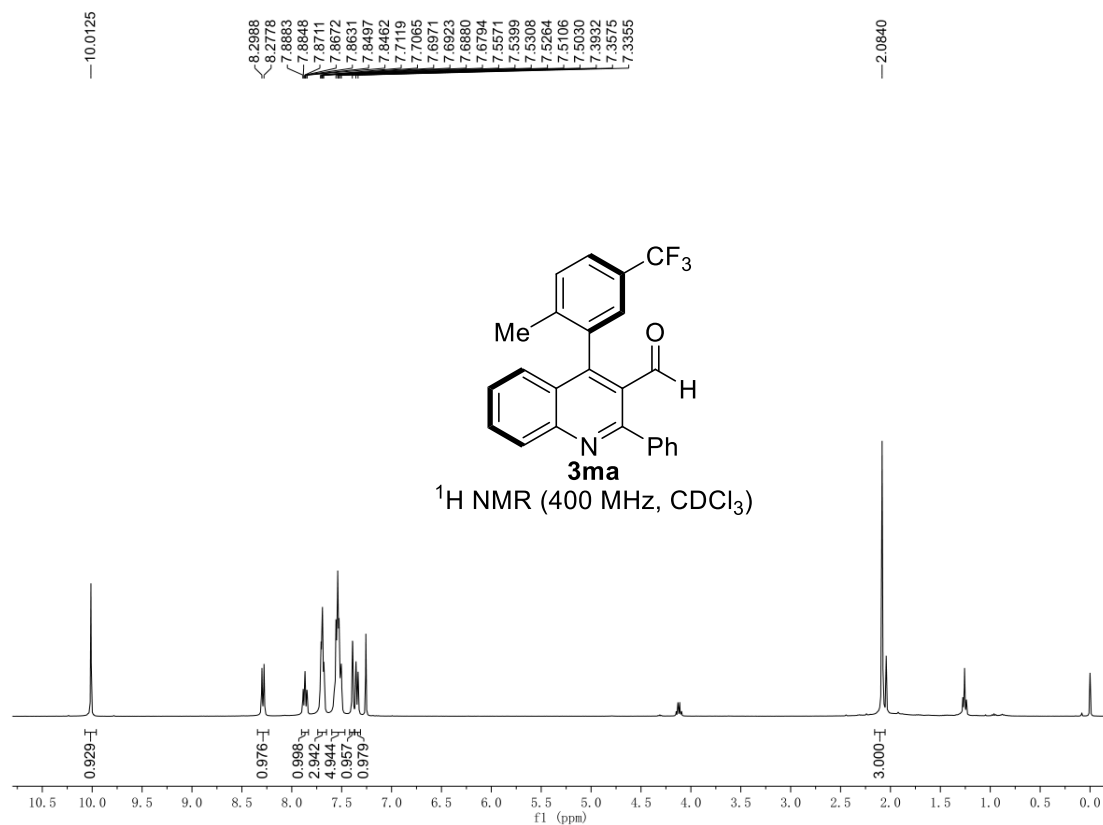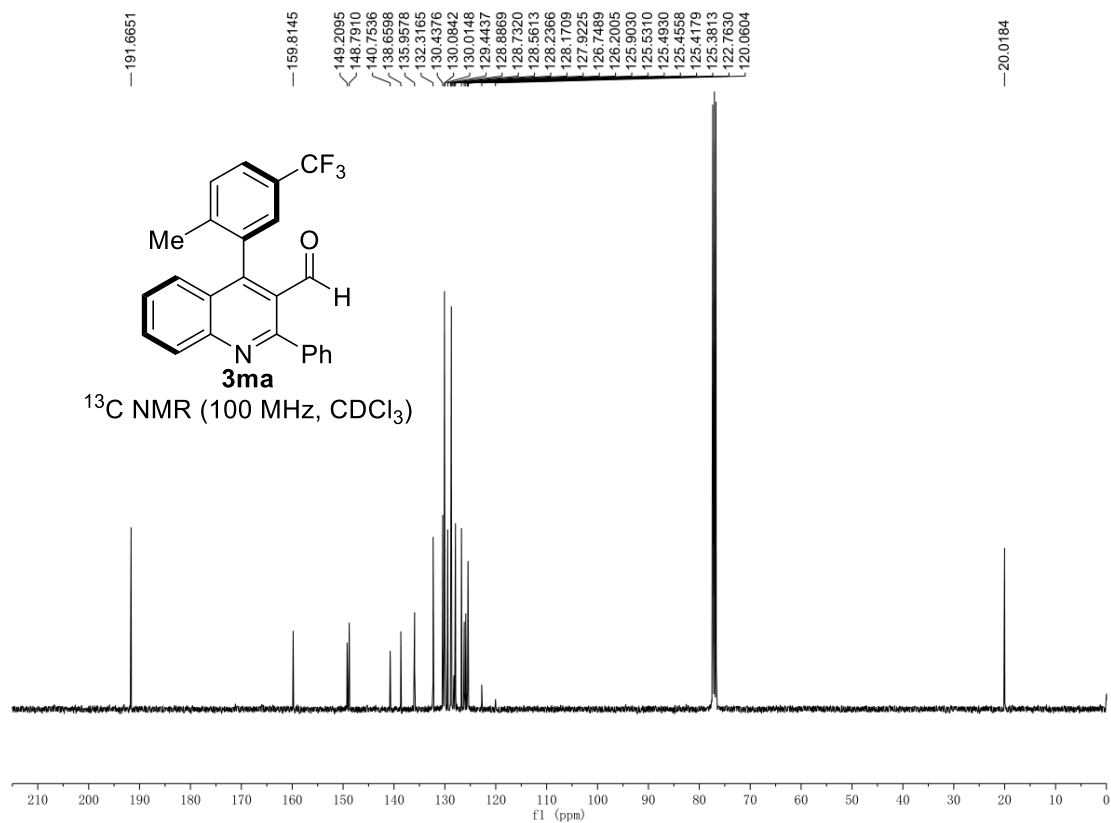

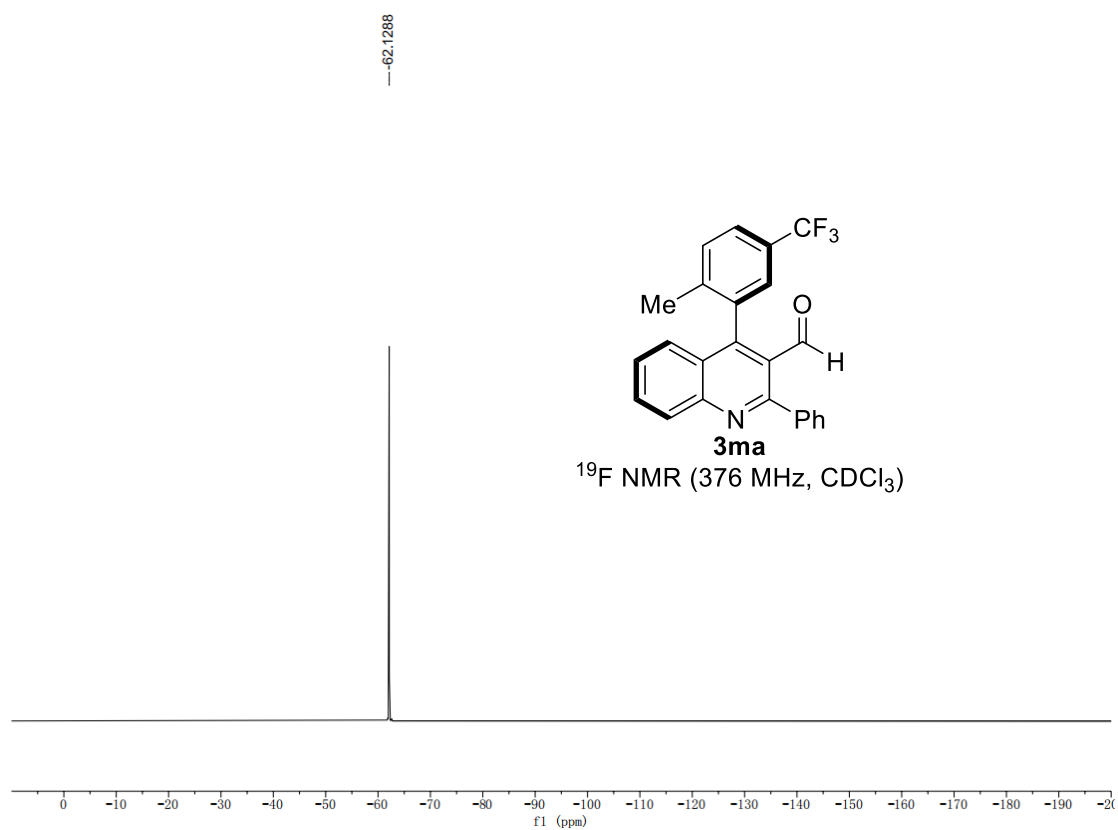

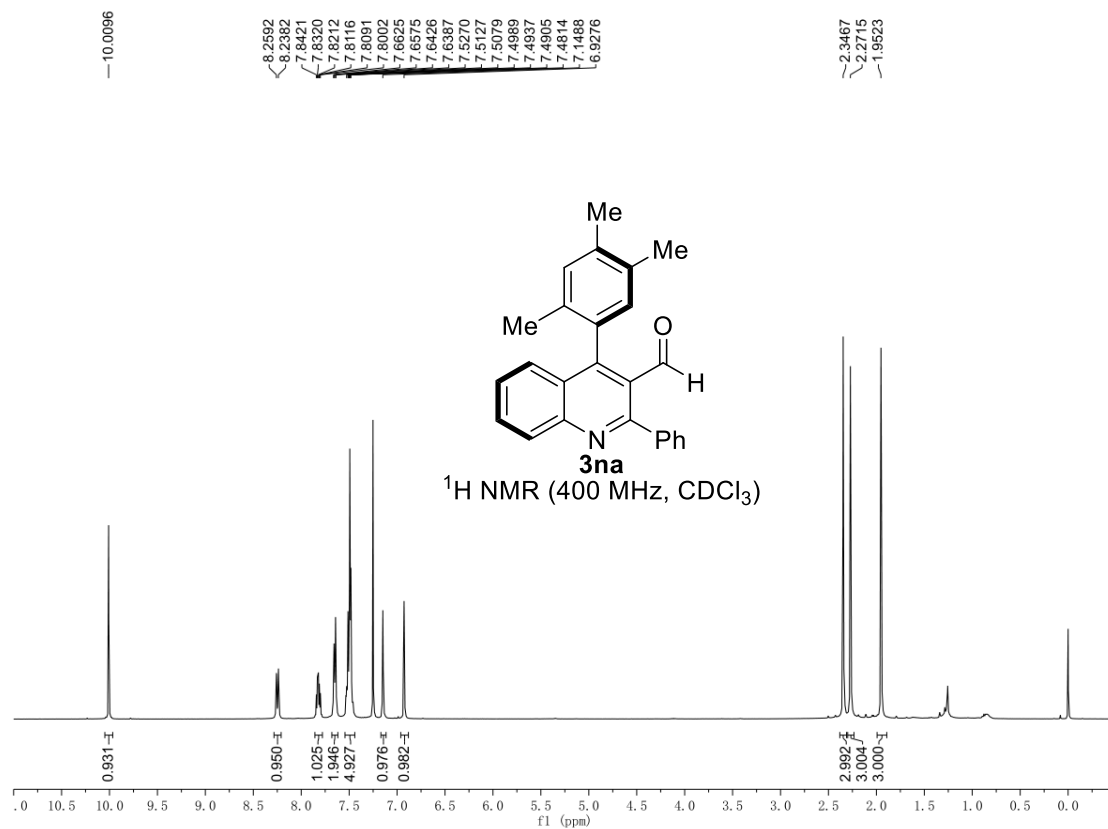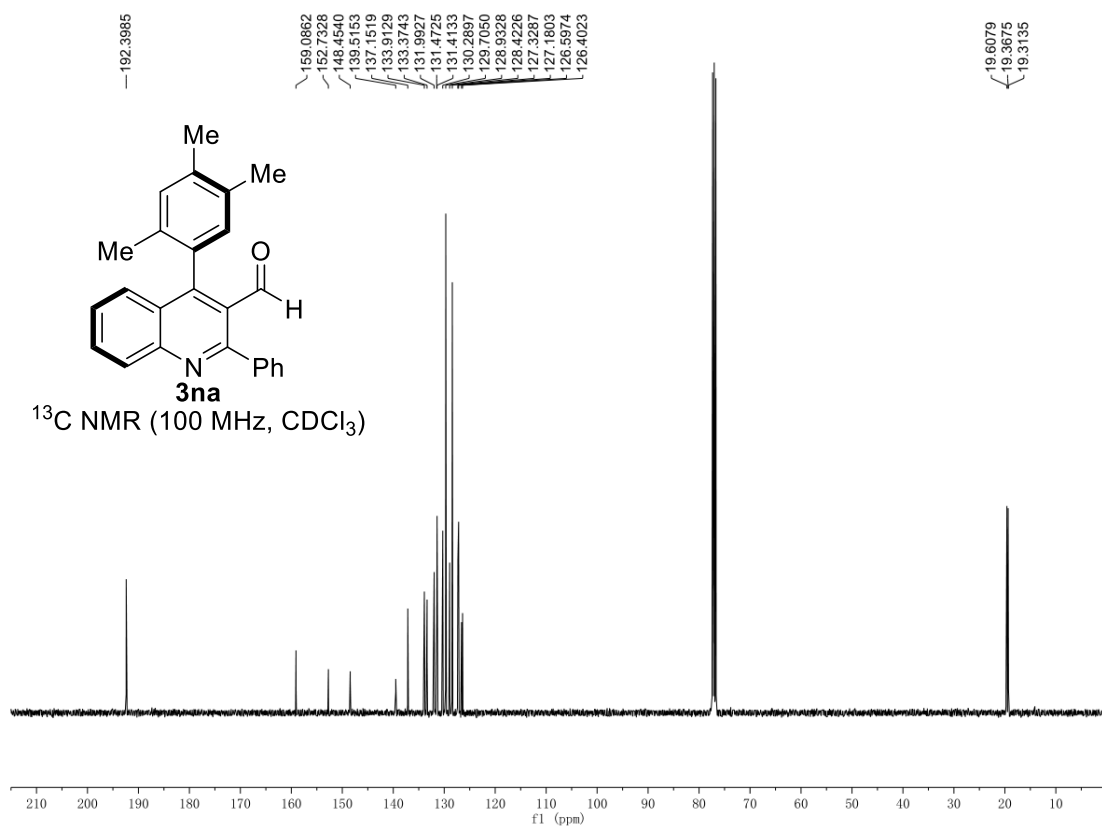

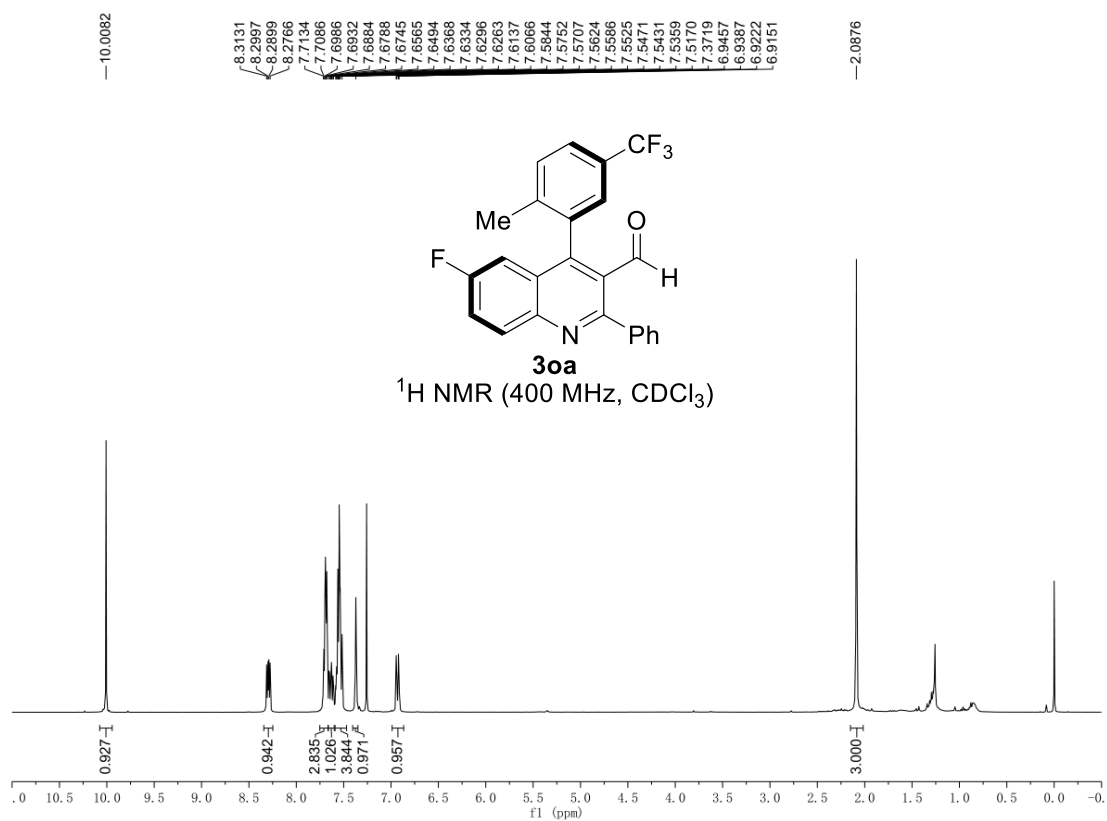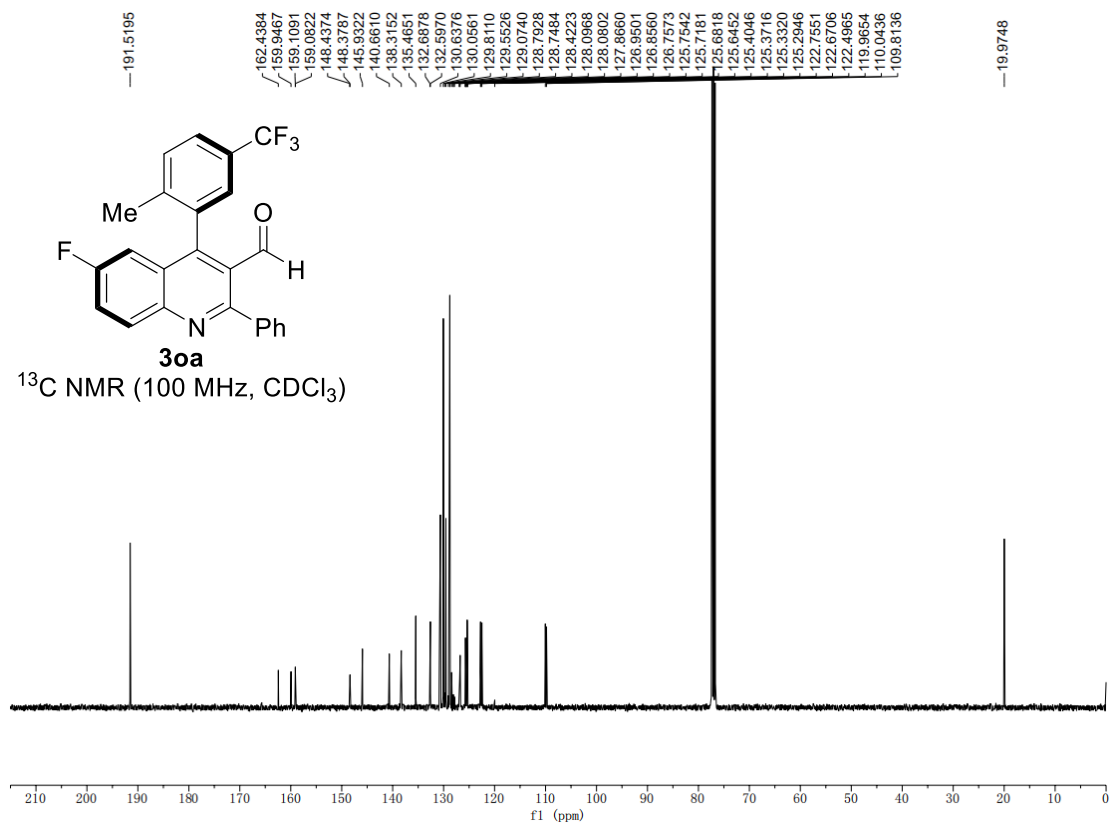

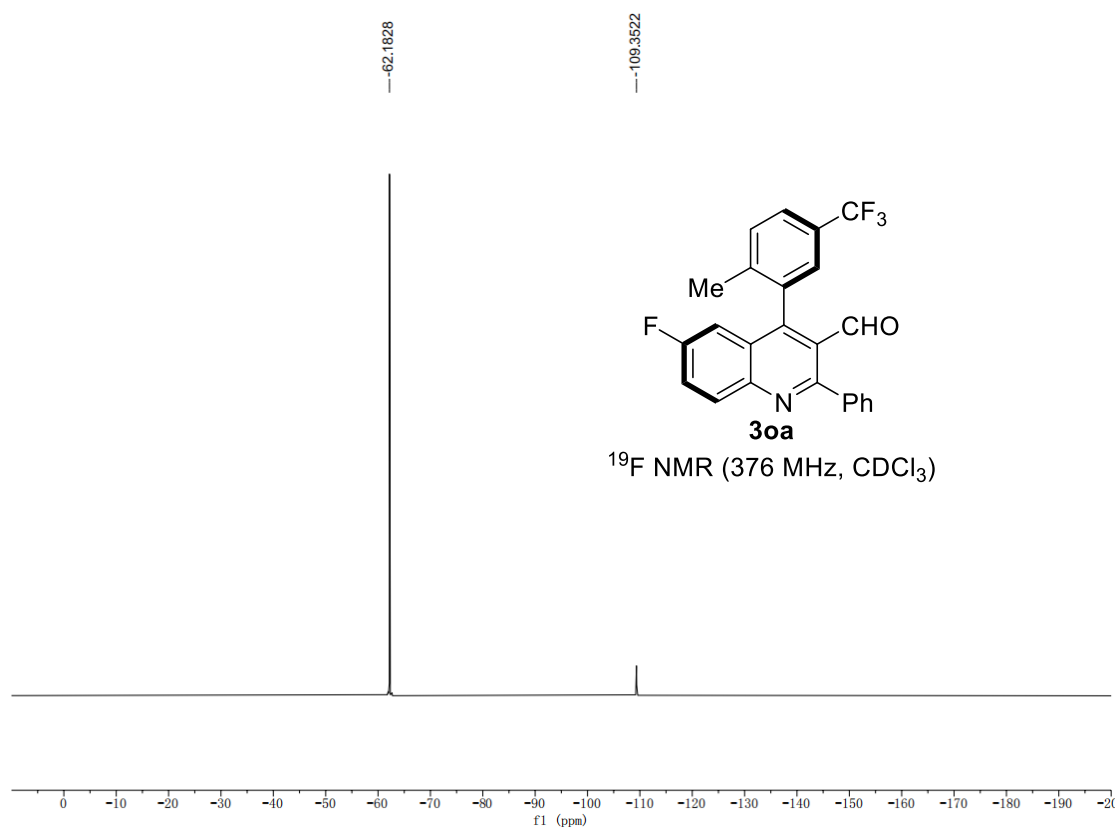



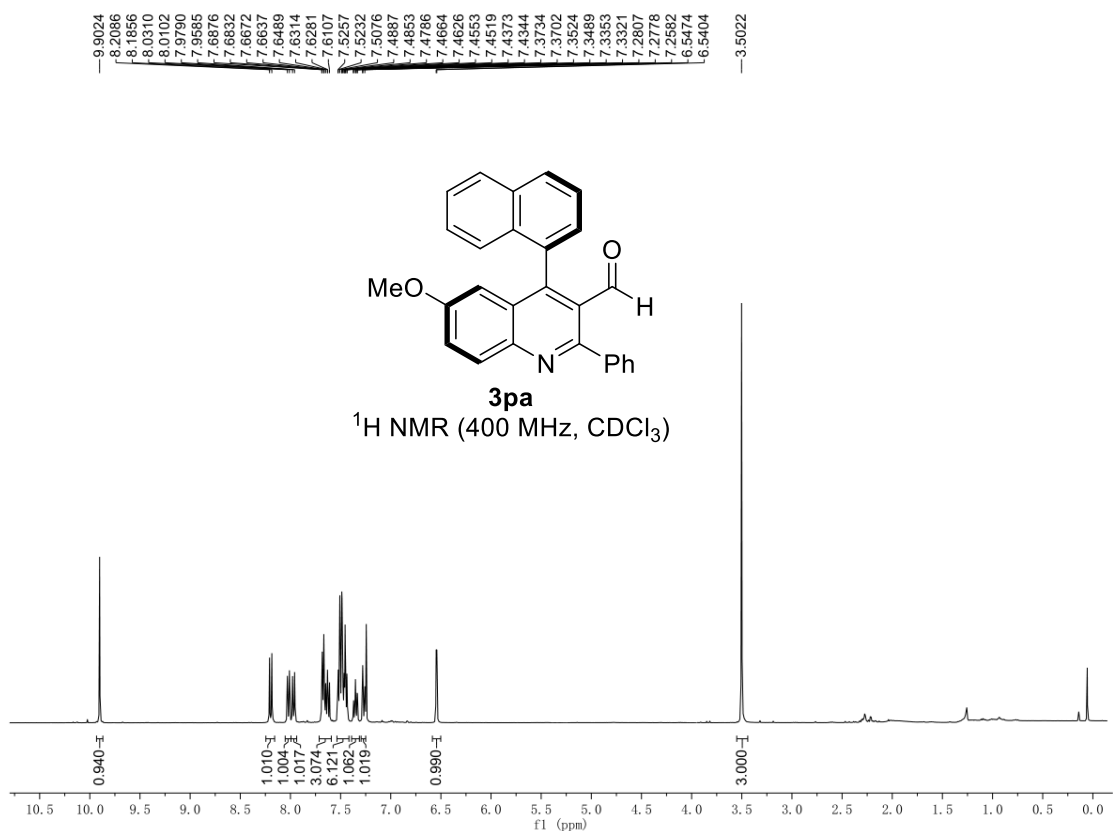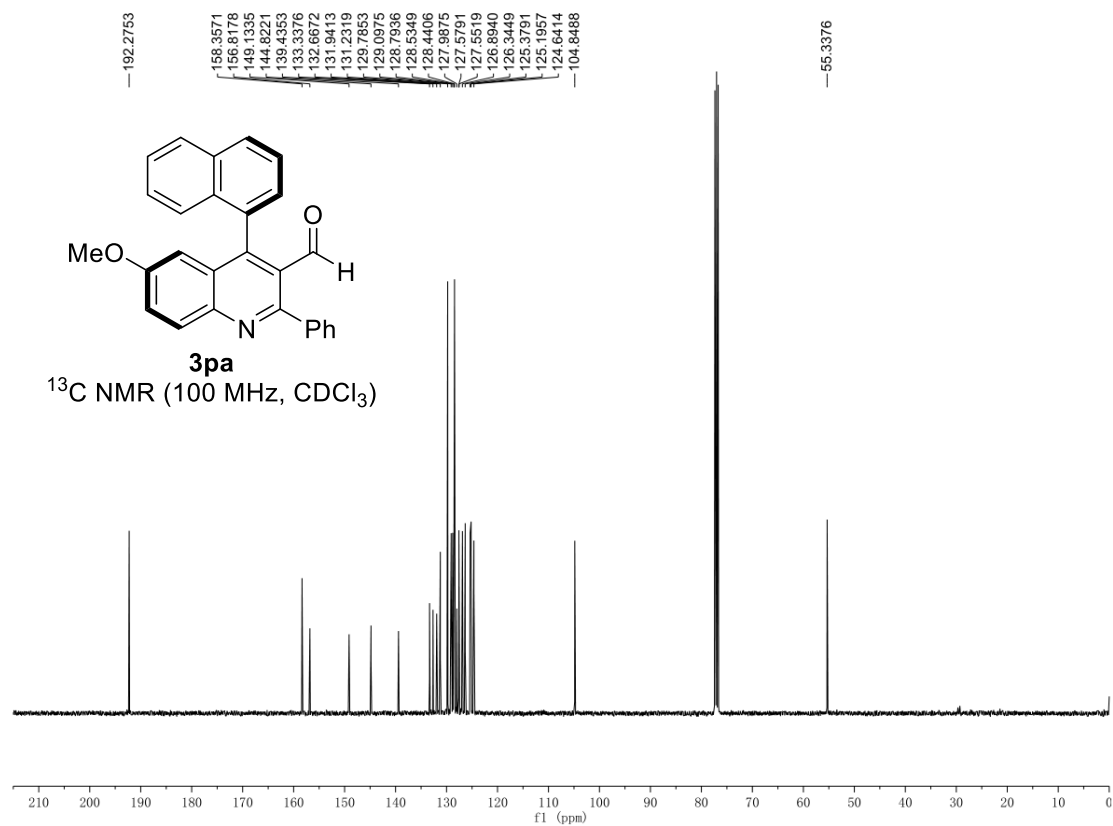

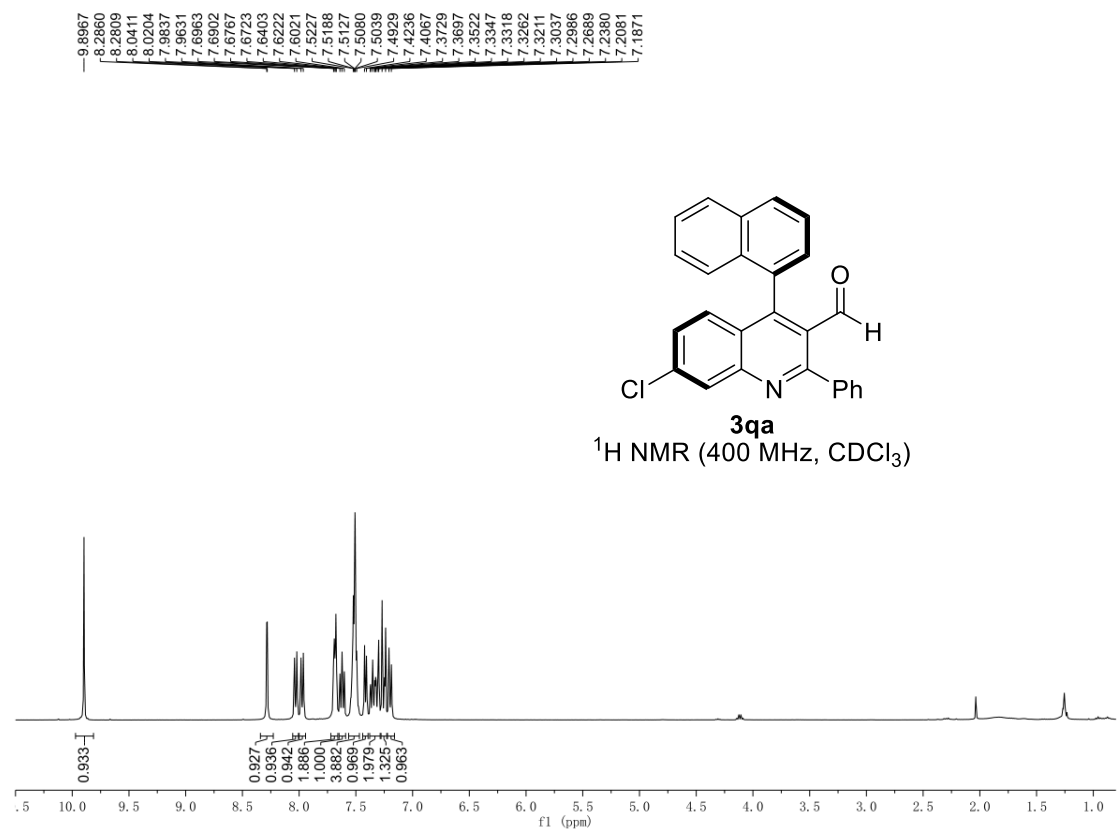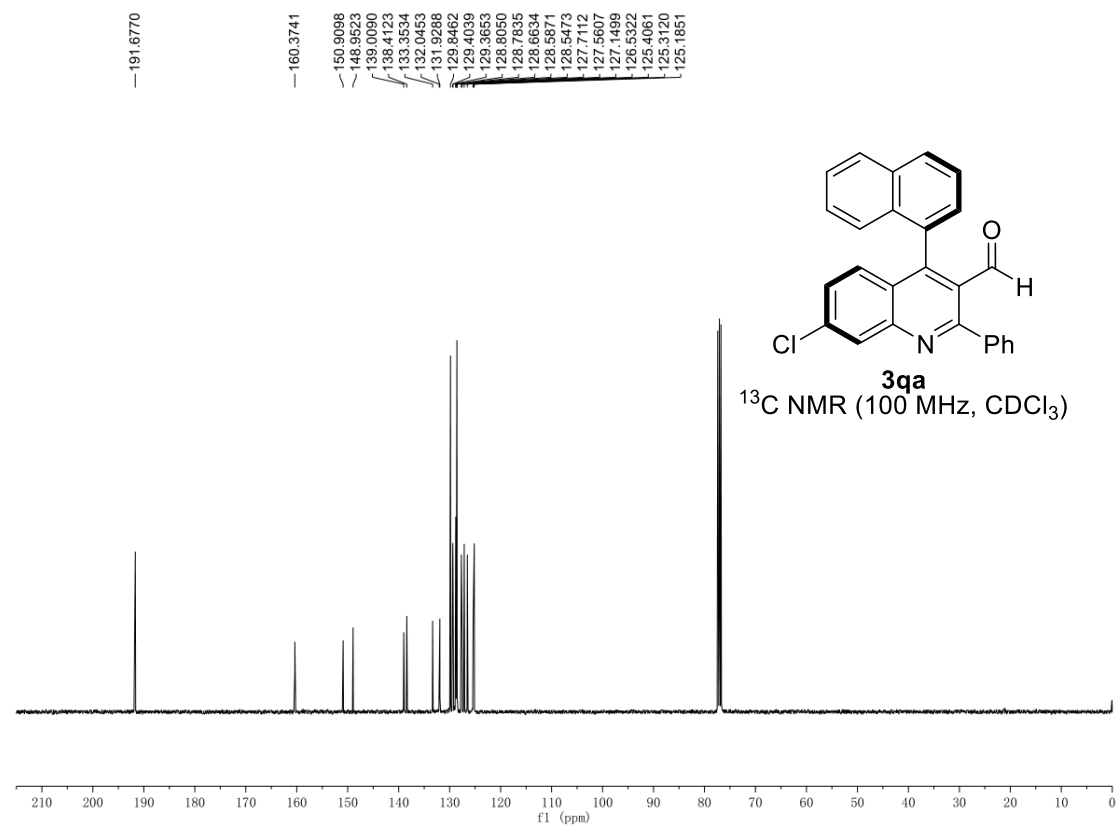

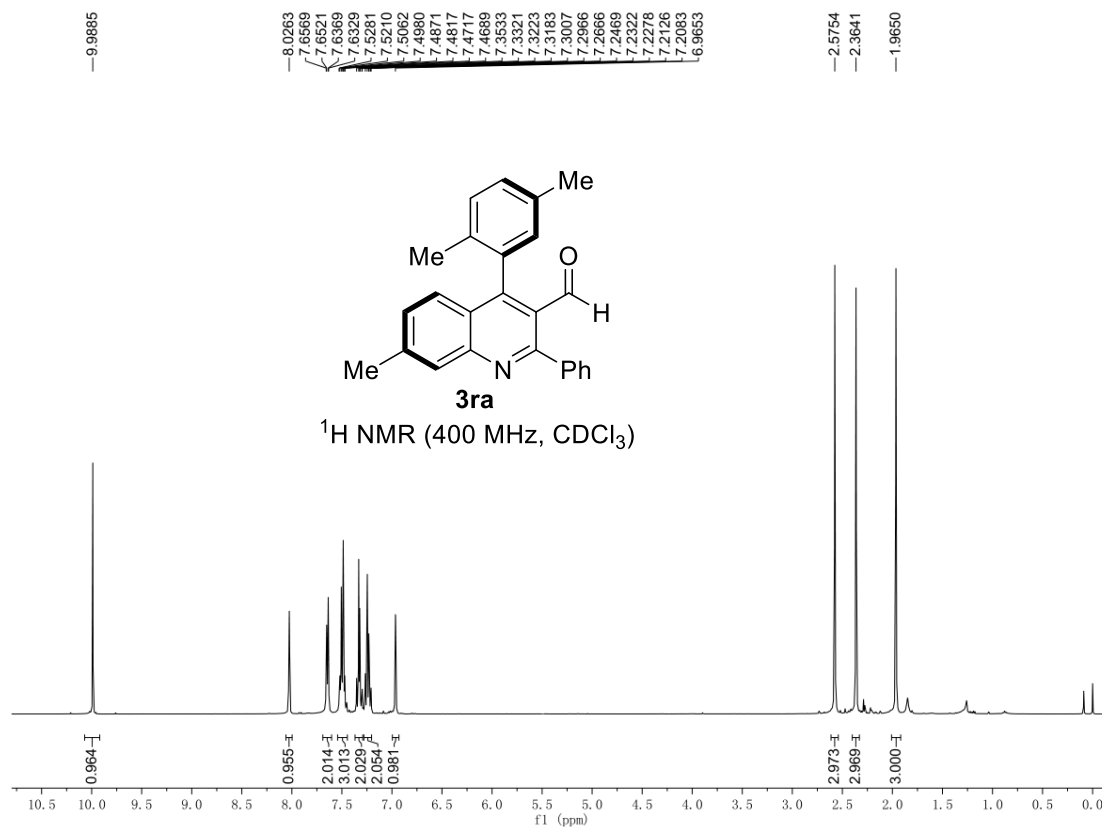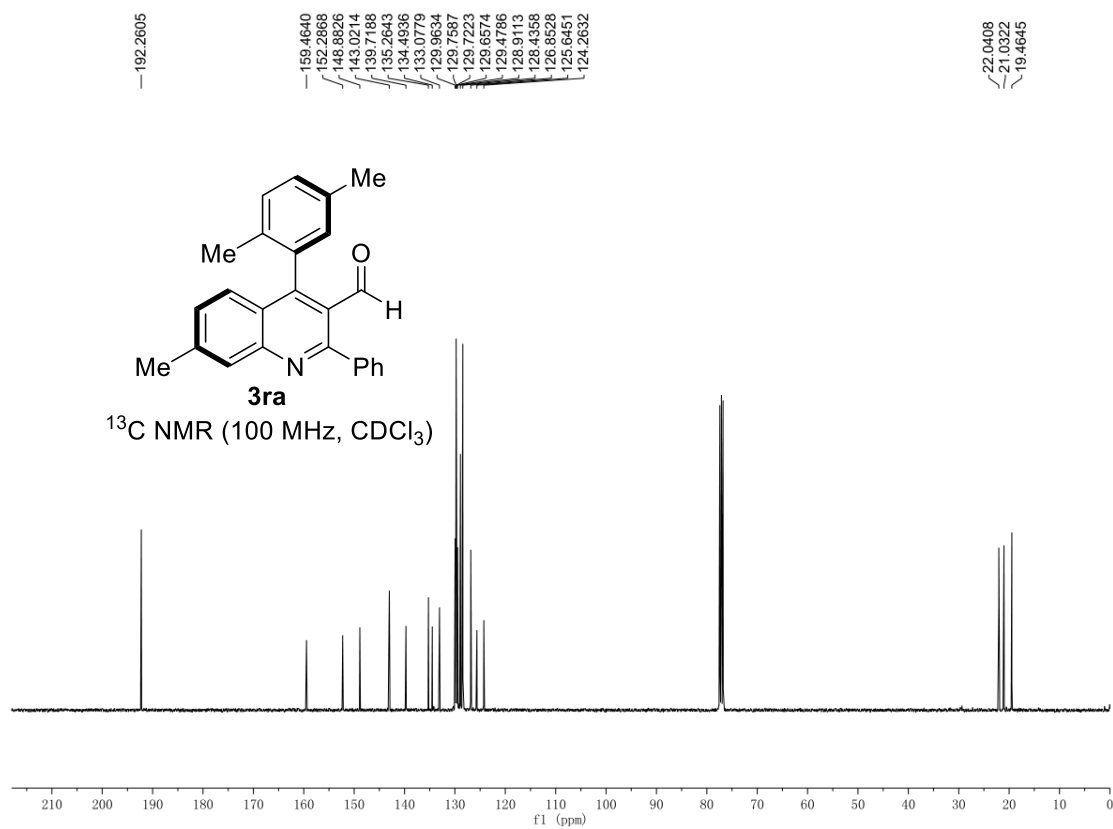

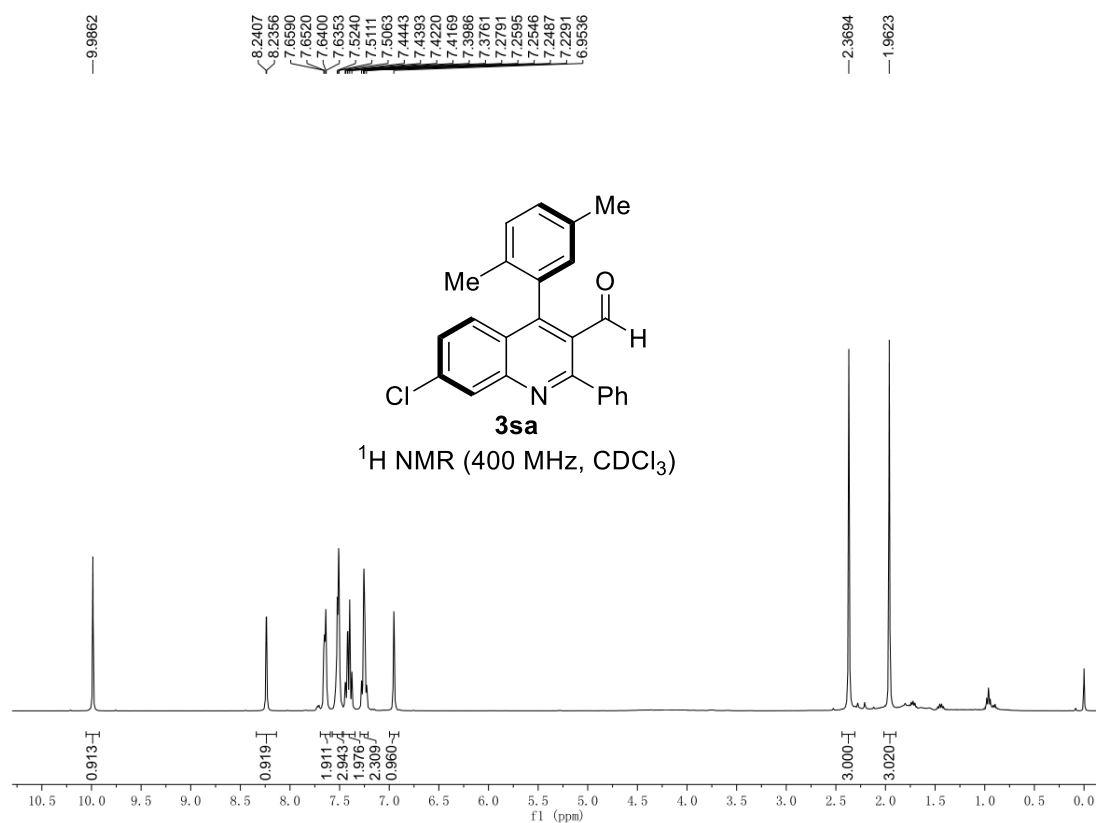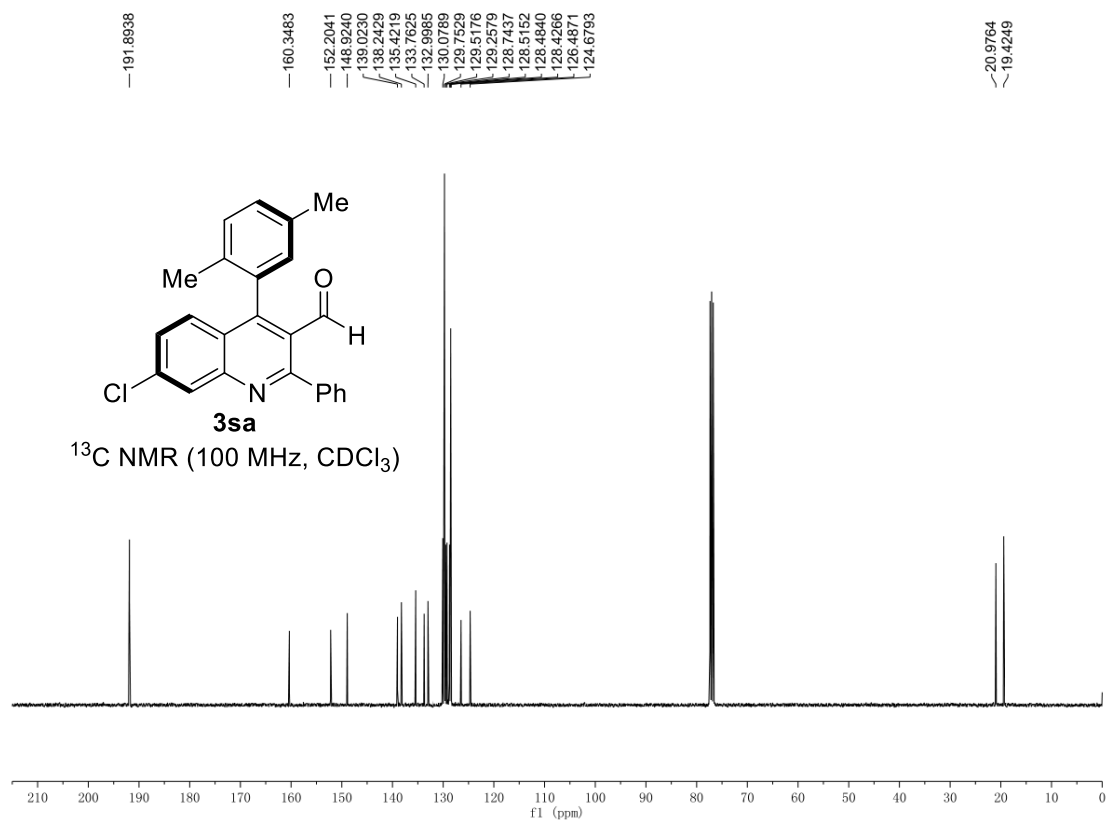

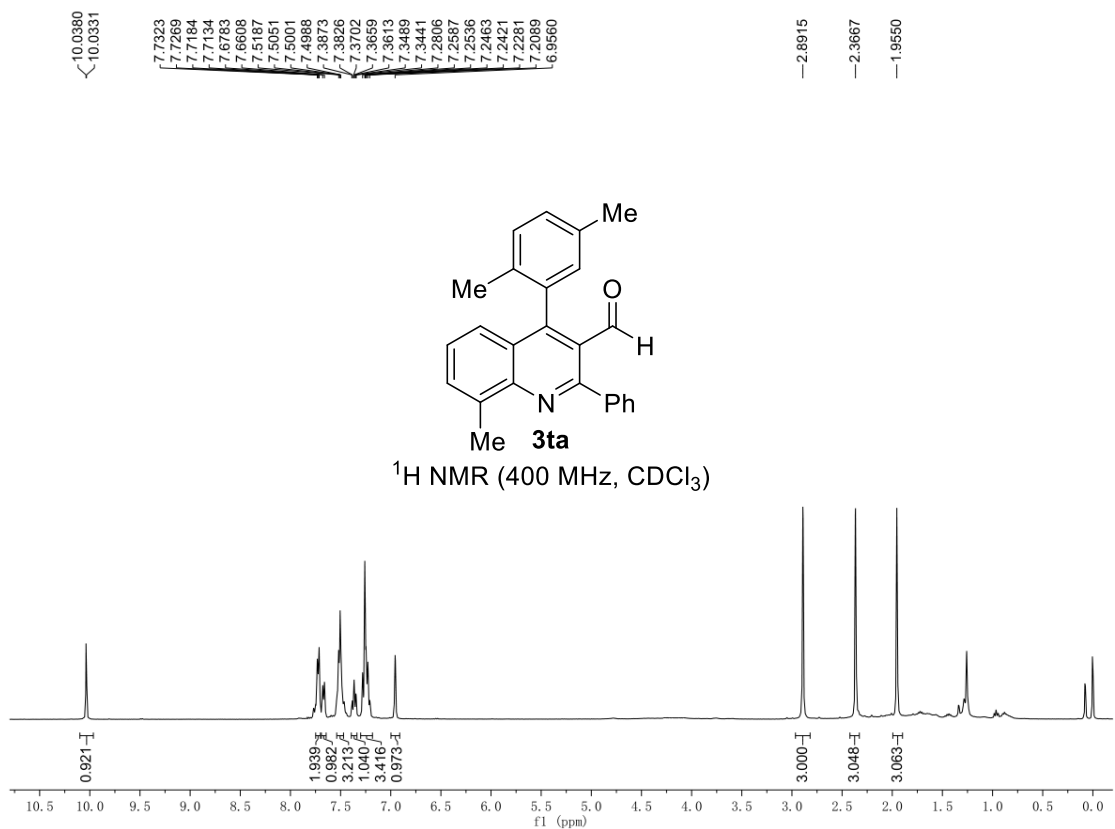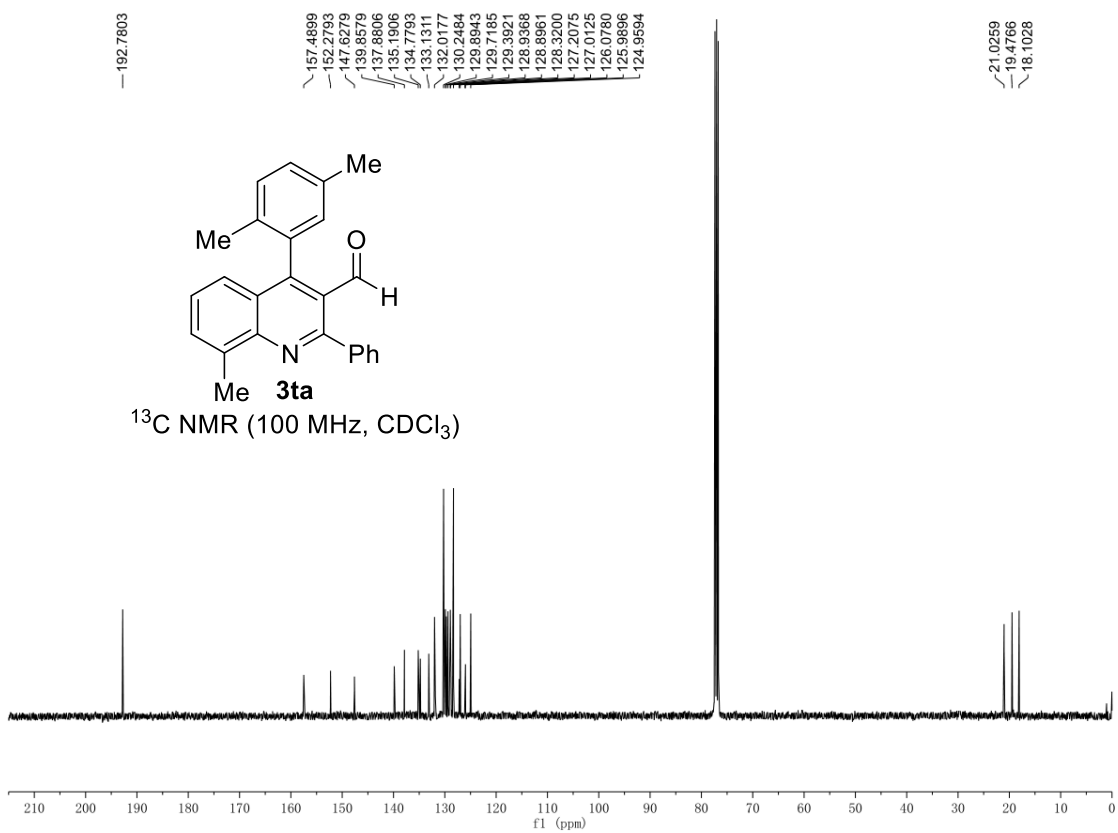

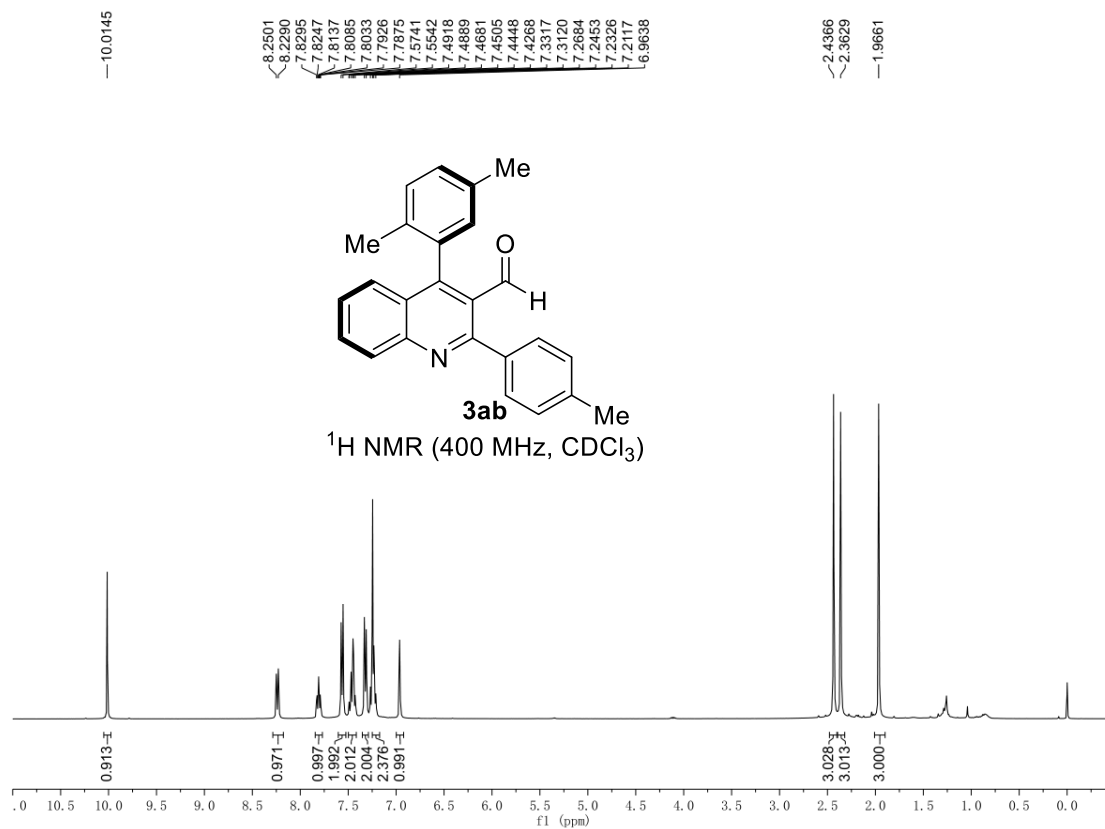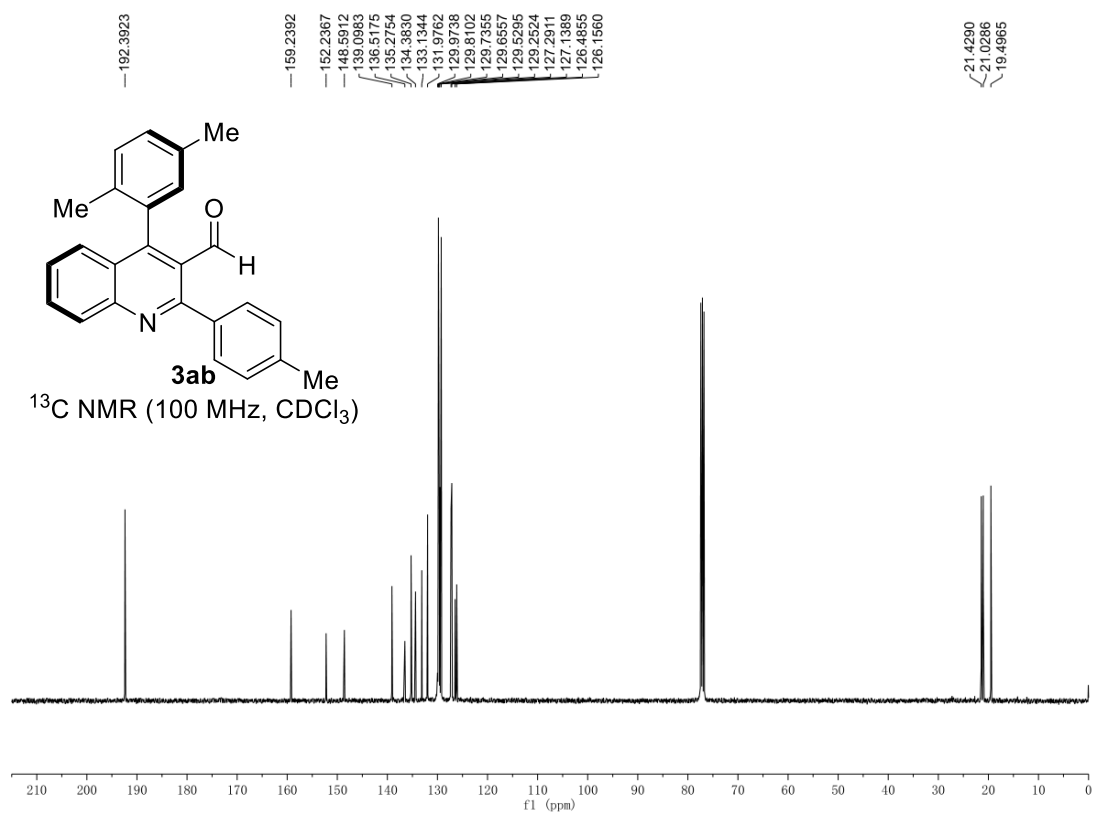

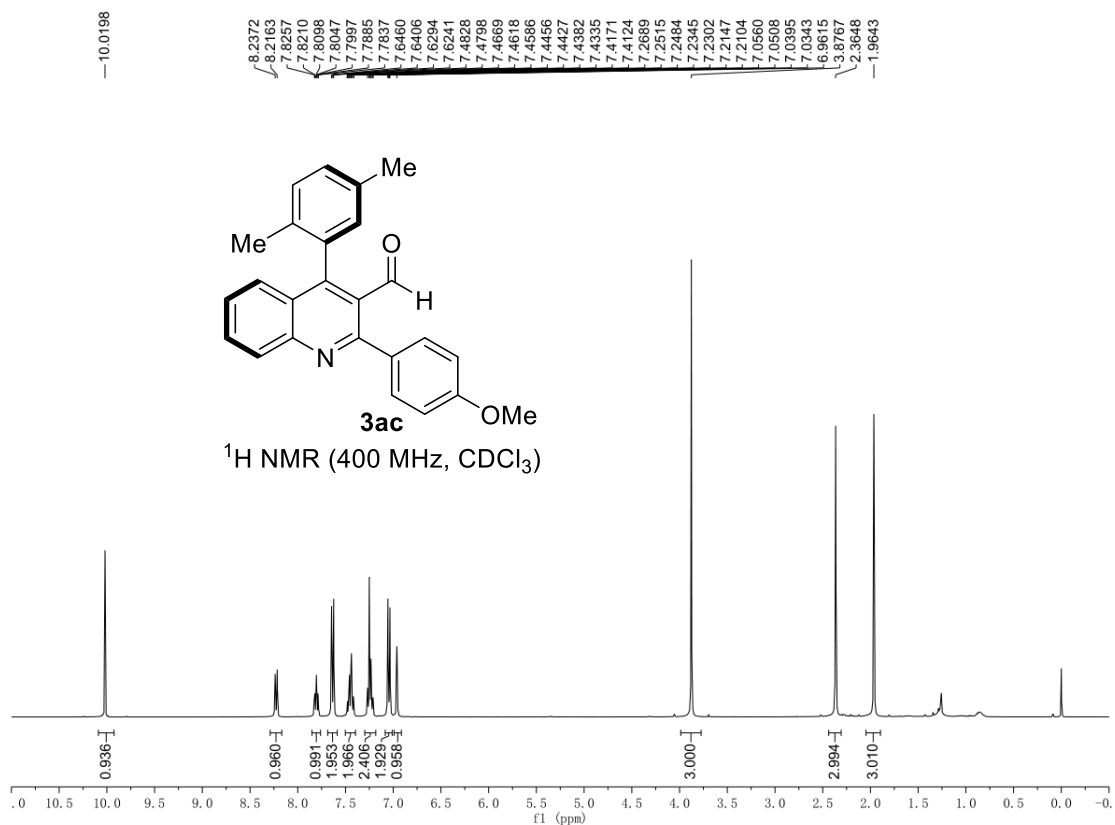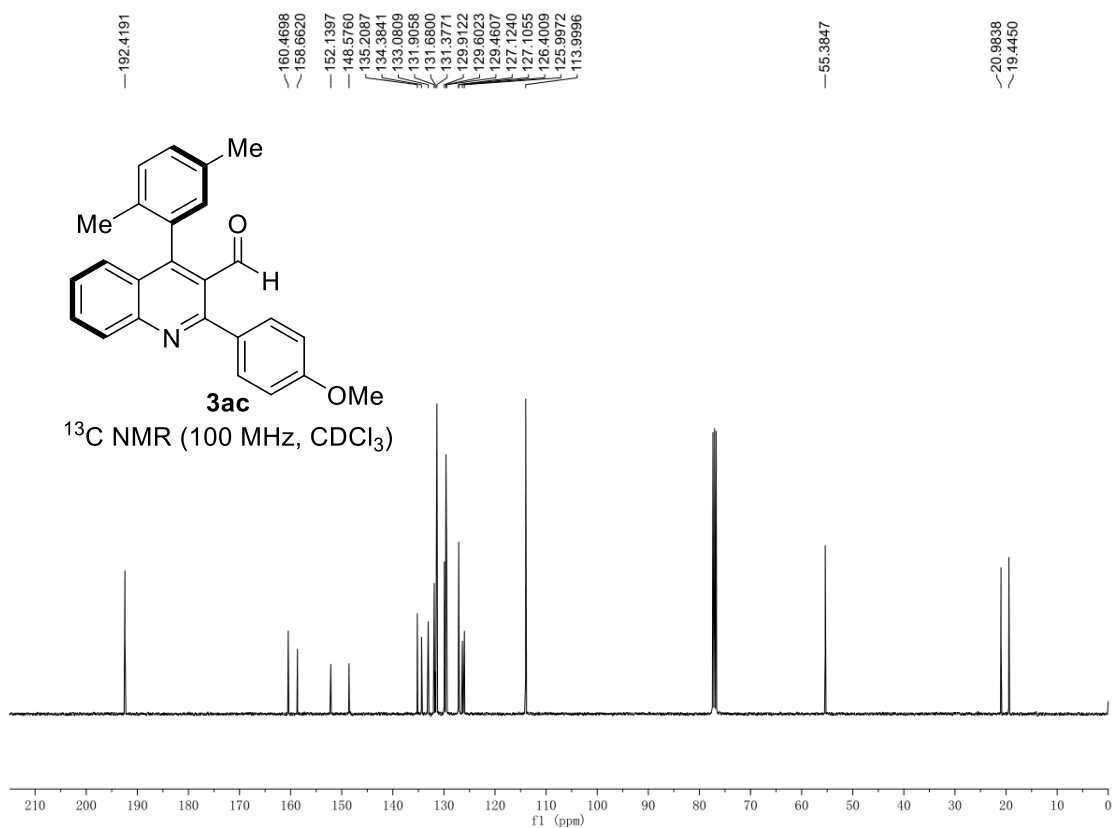

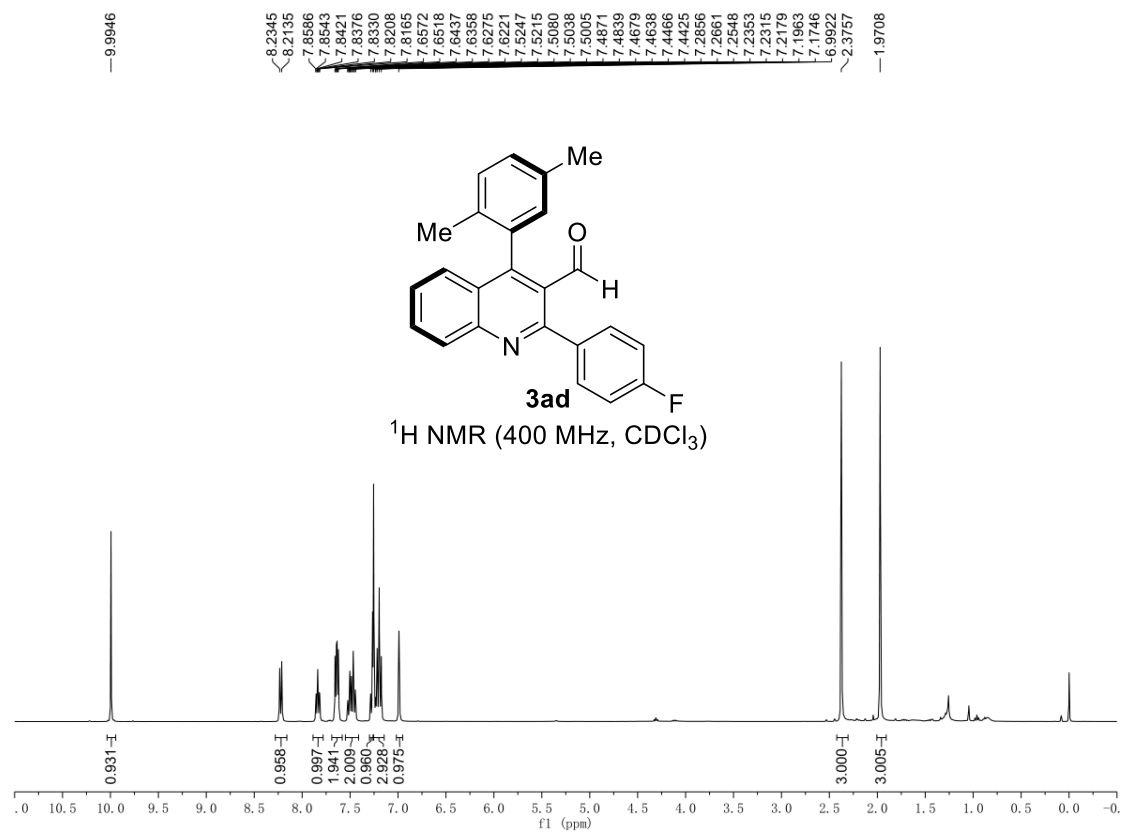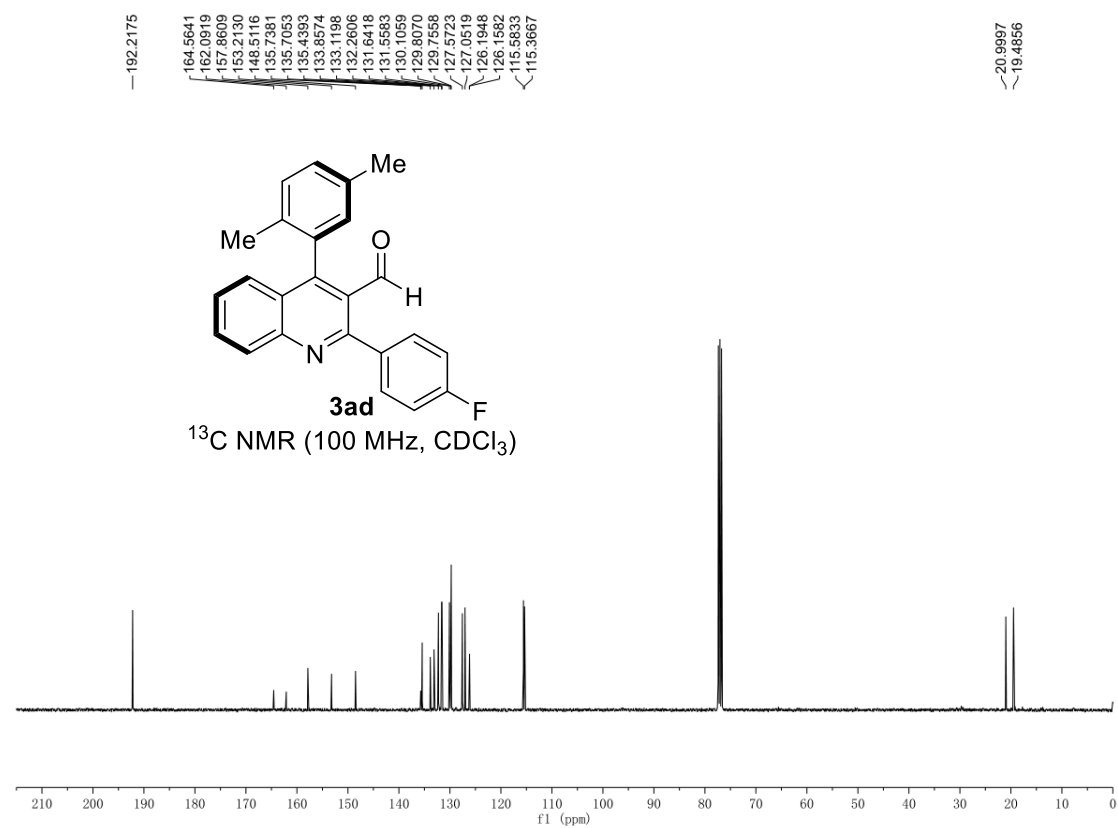



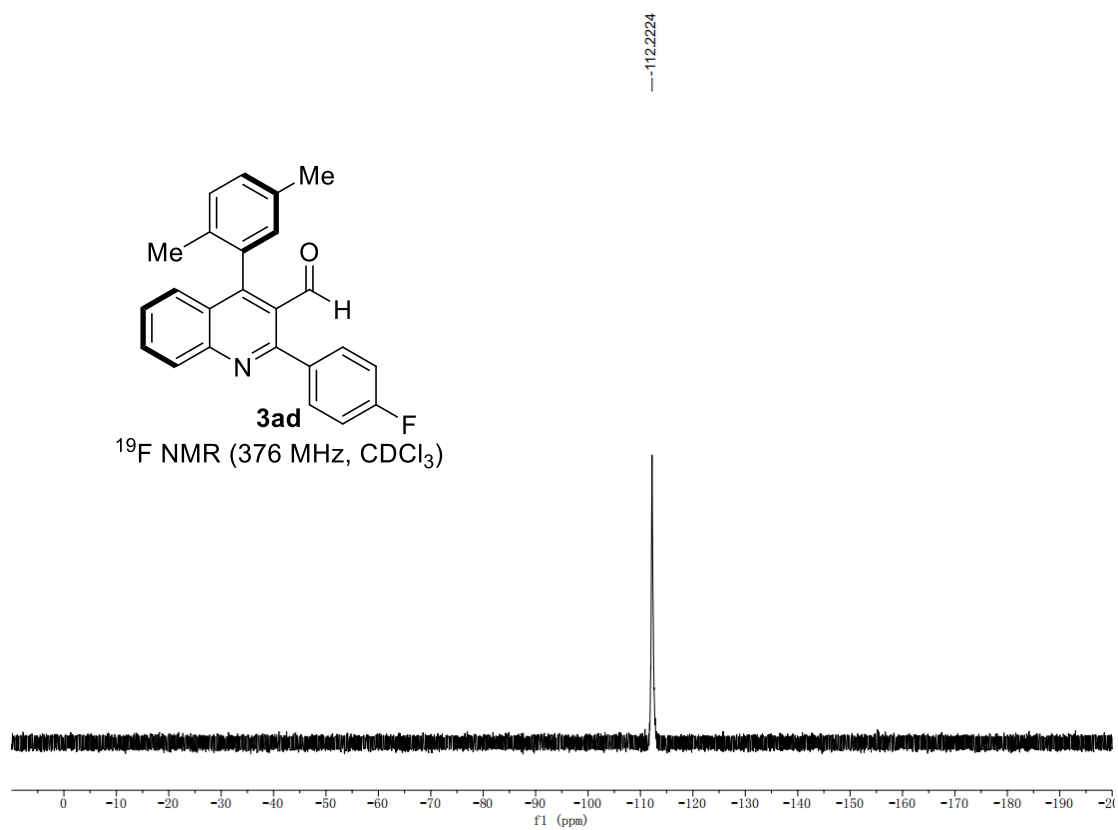

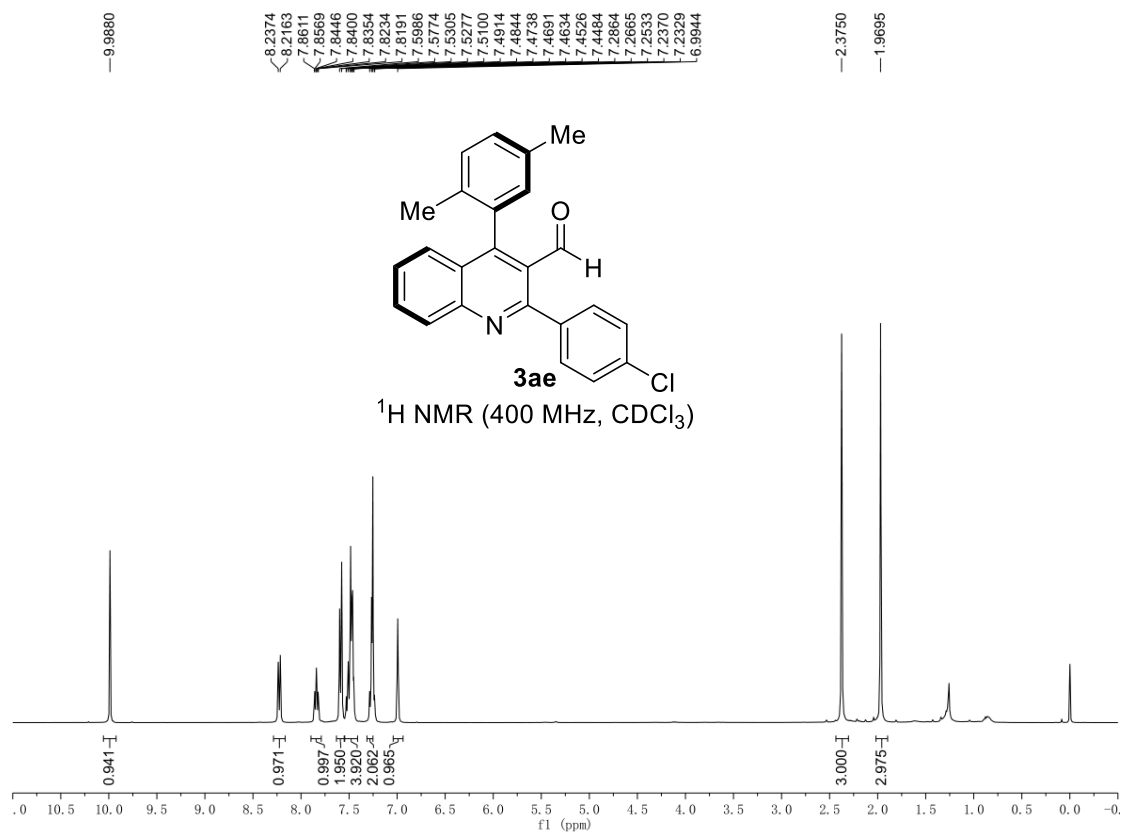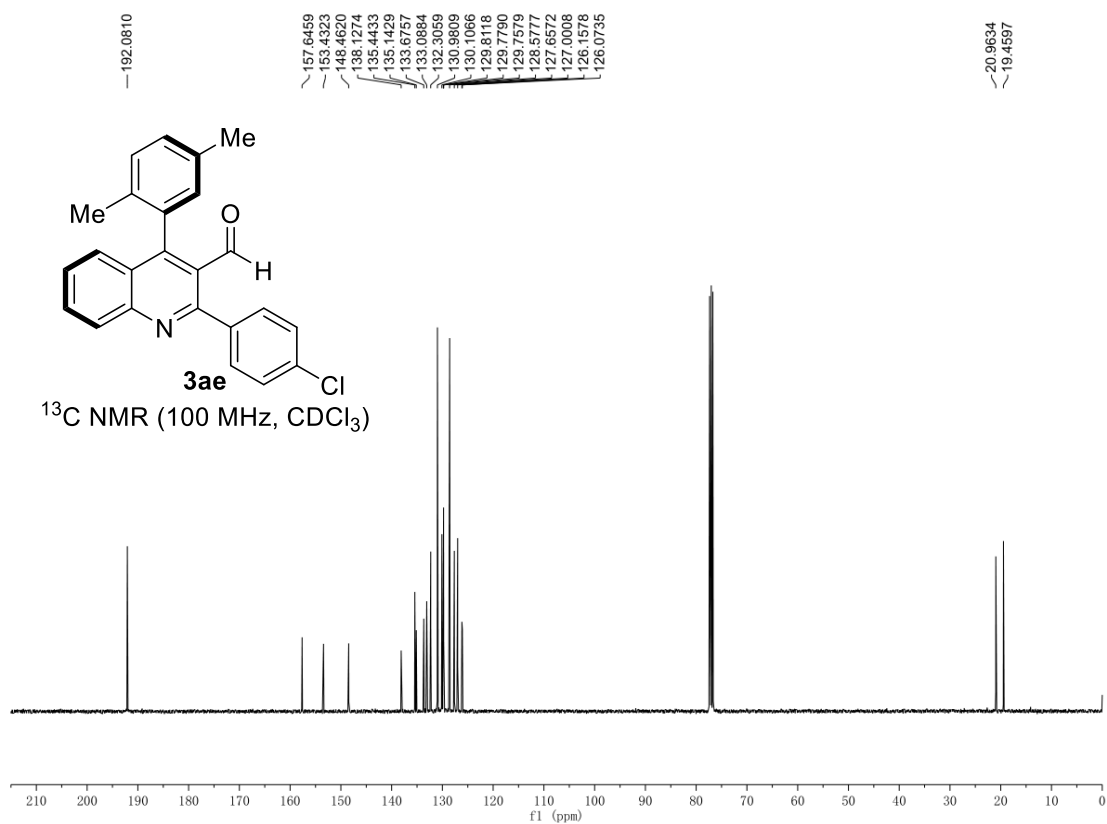

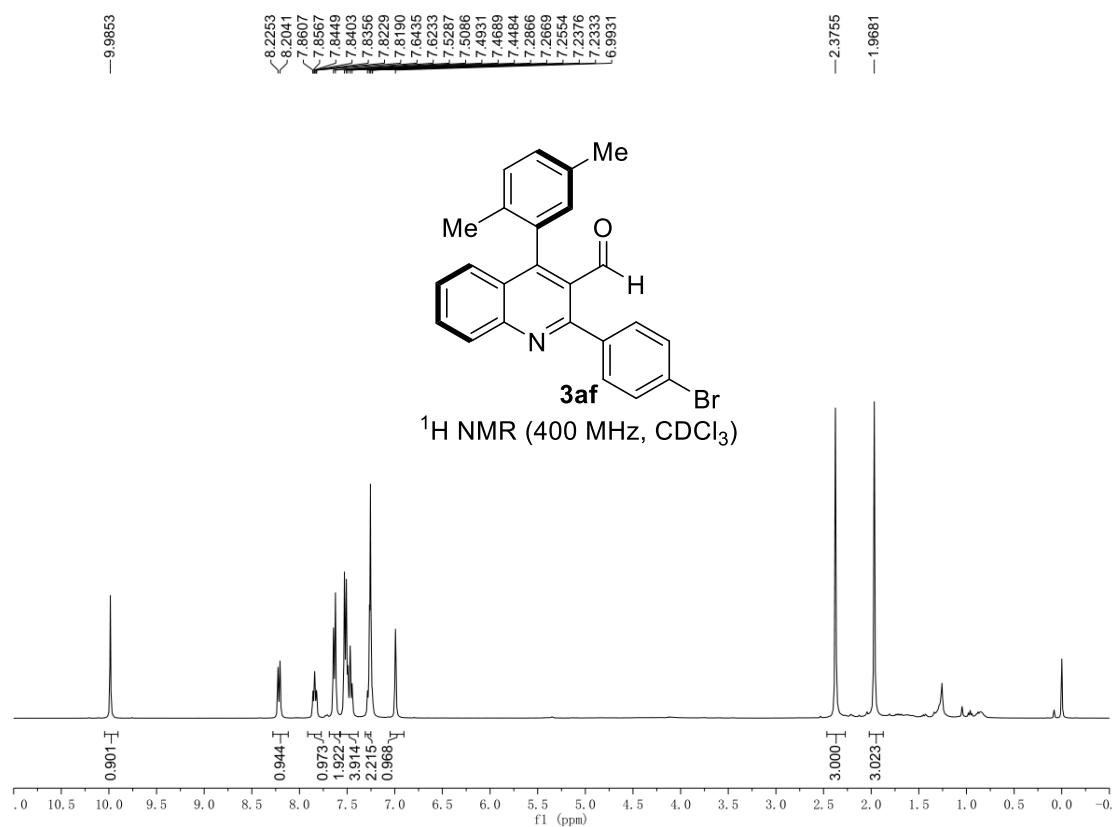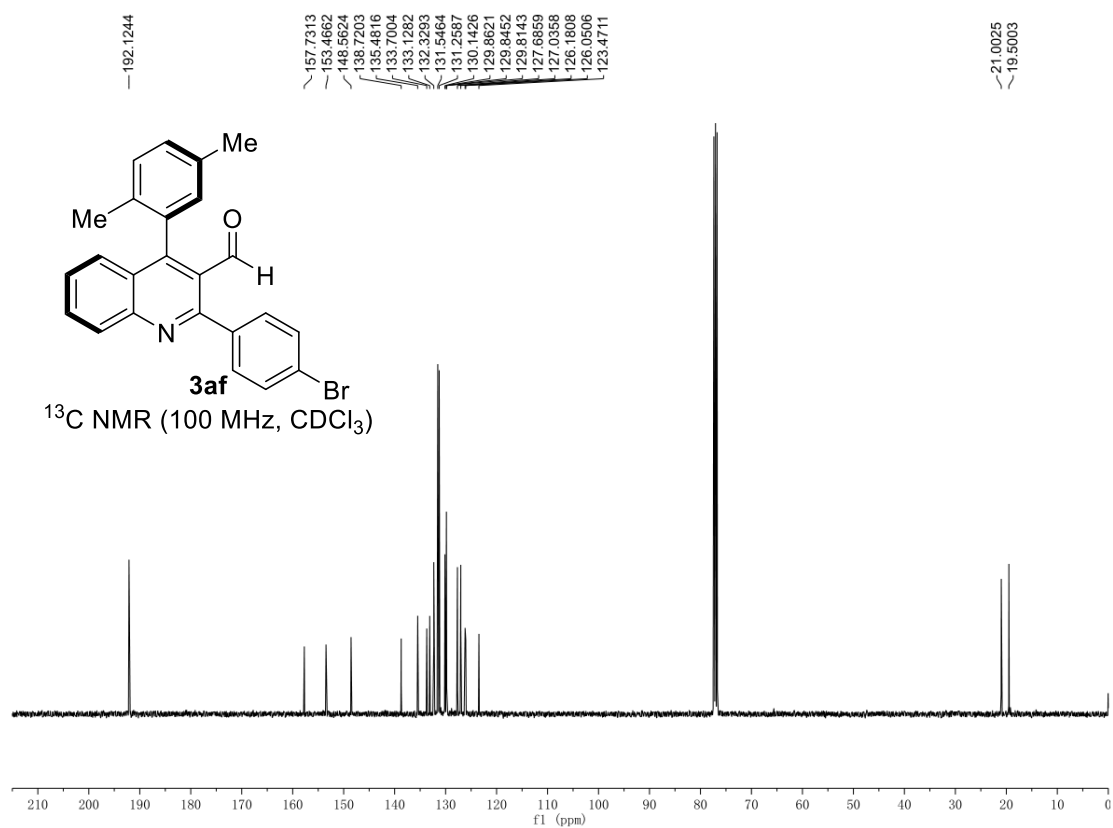

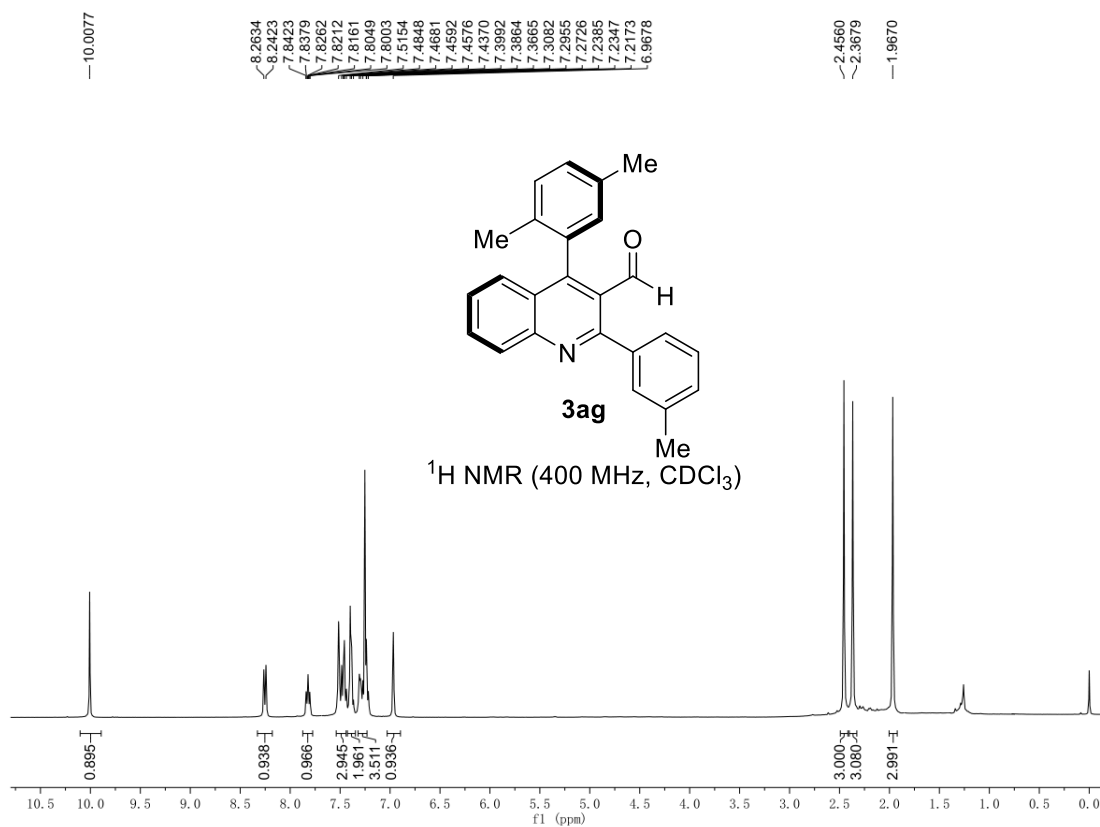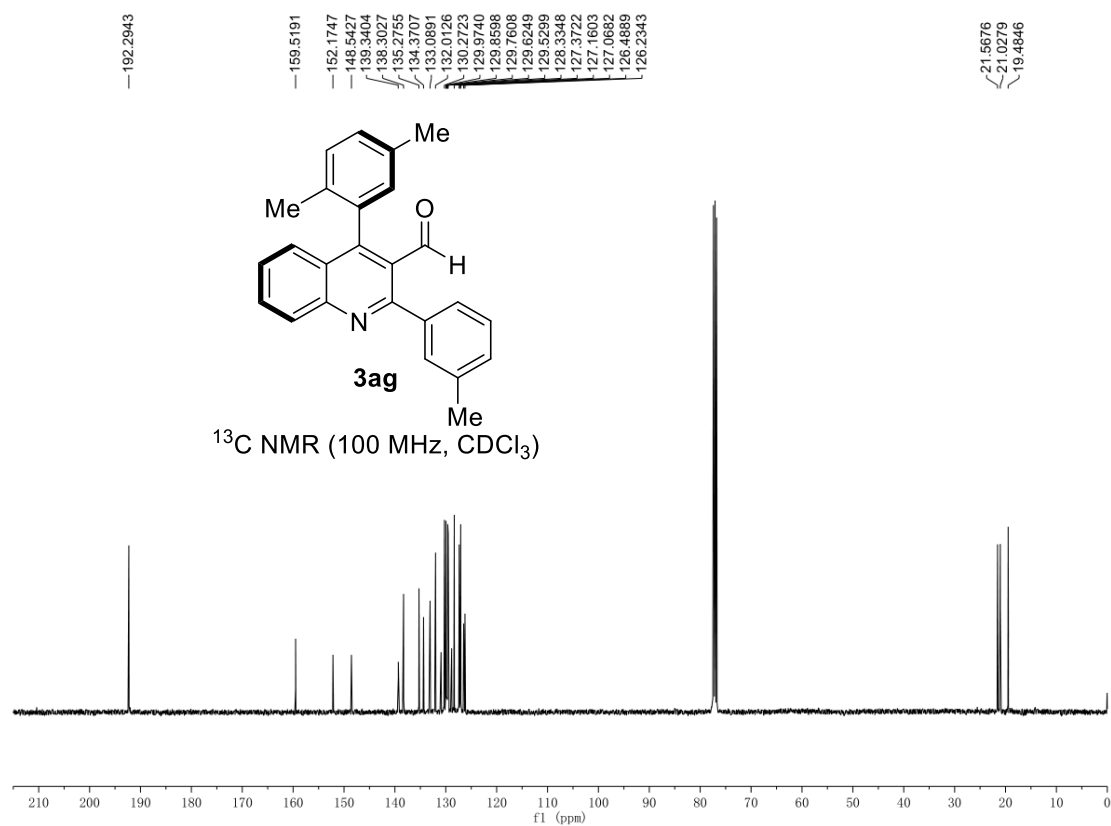

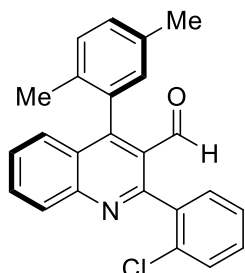

**3ah**

$^1\text{H}$  NMR (400 MHz,  $\text{CDCl}_3$ )

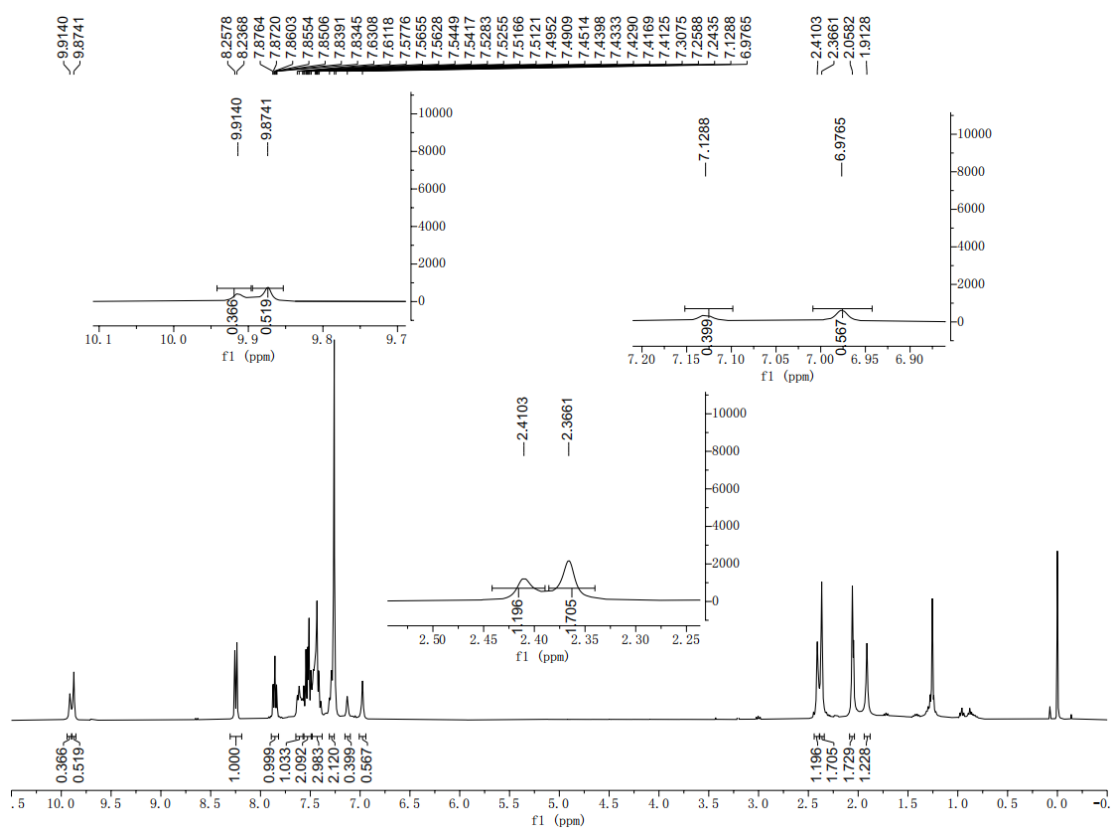

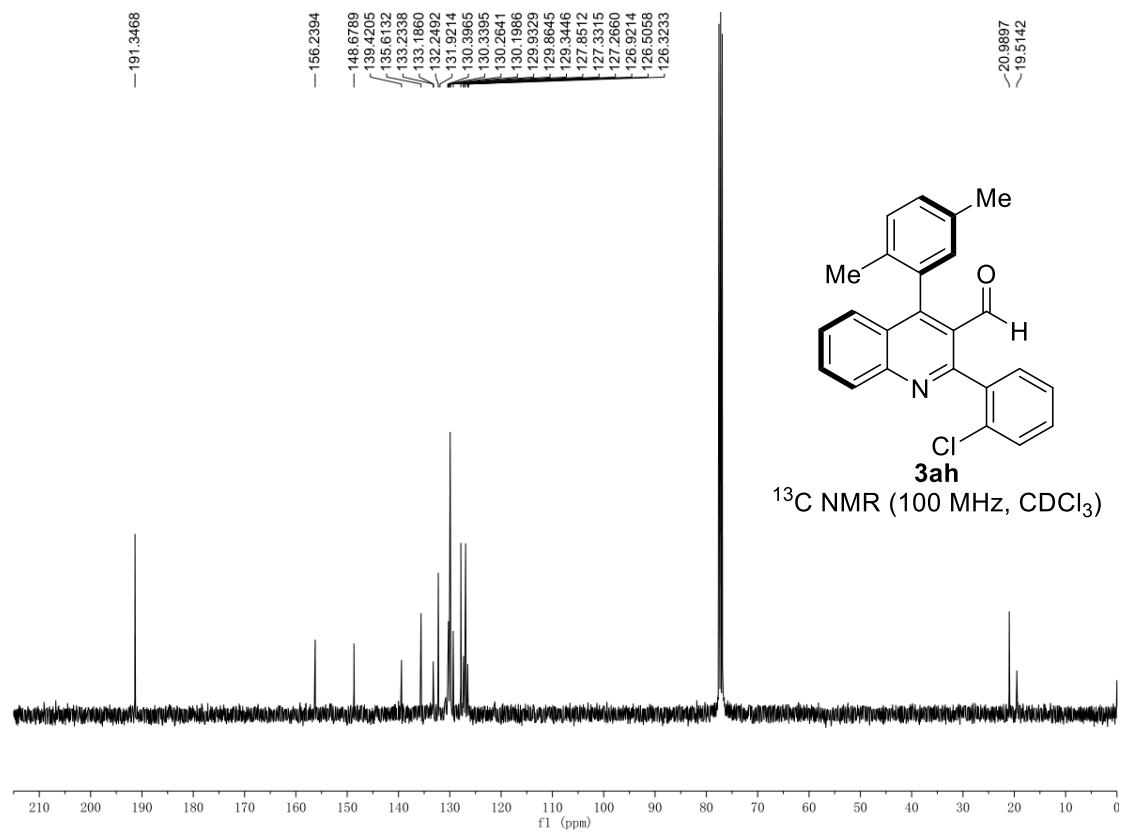

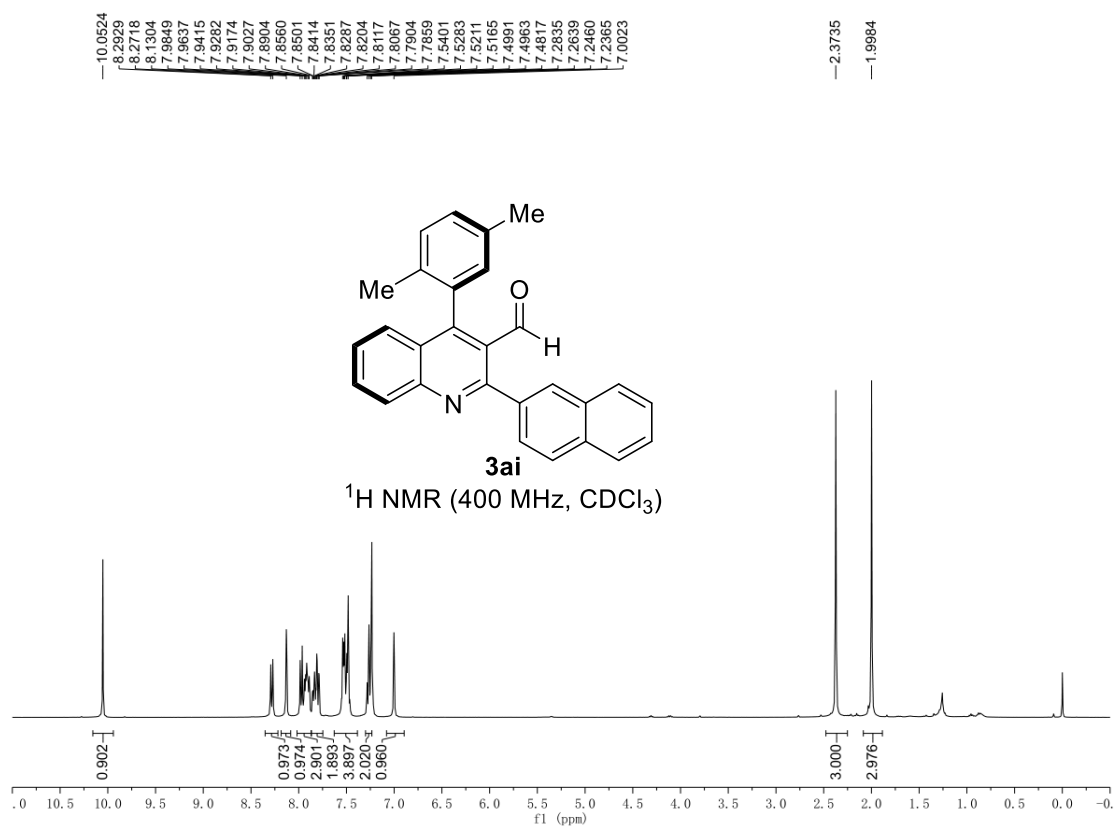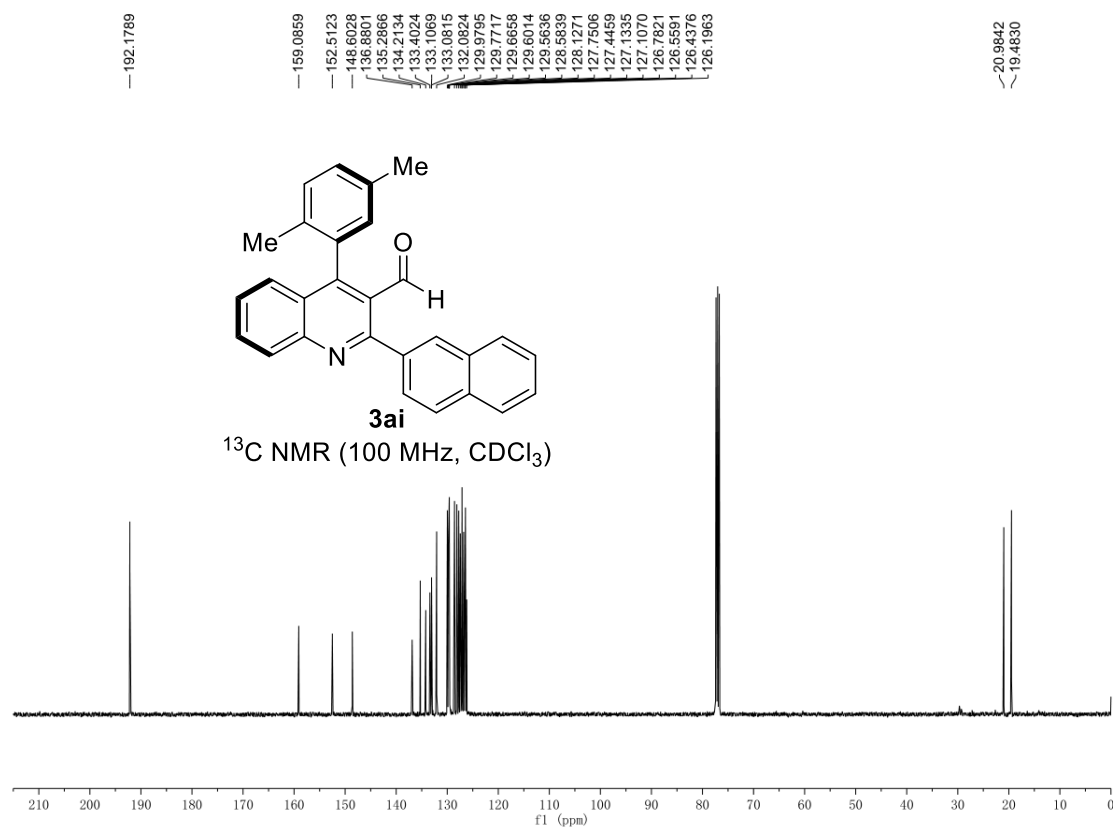

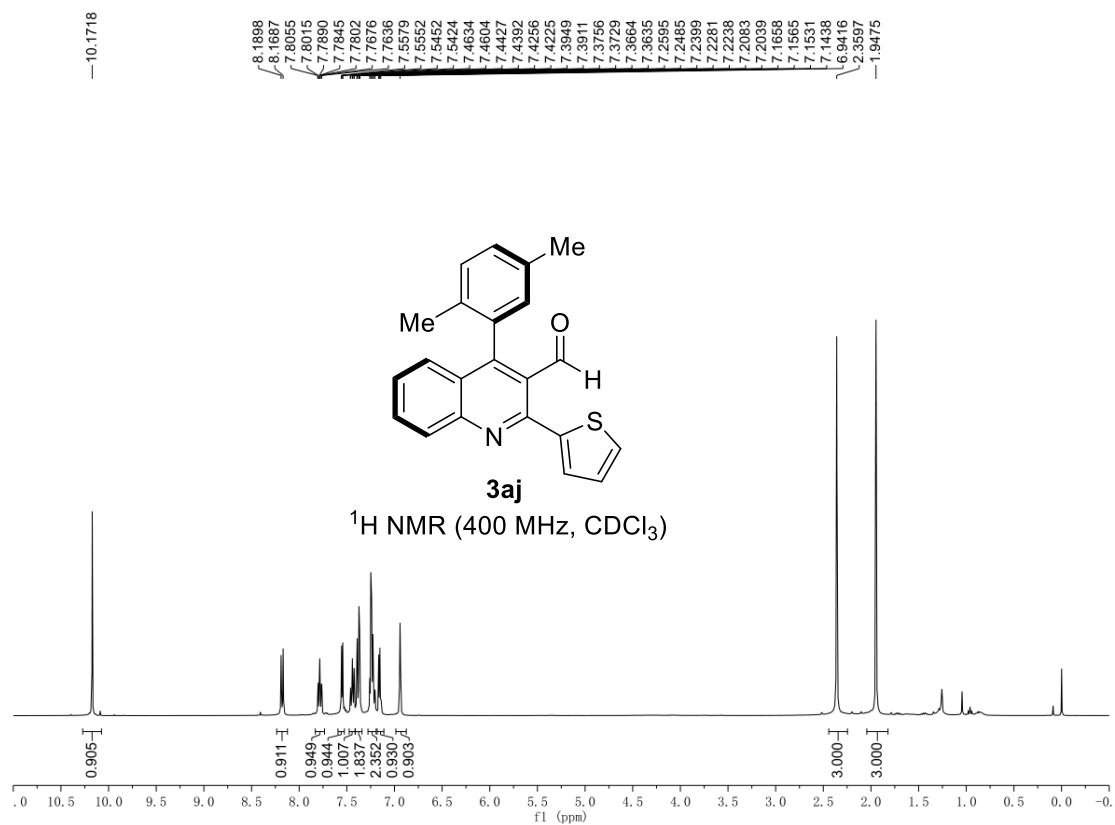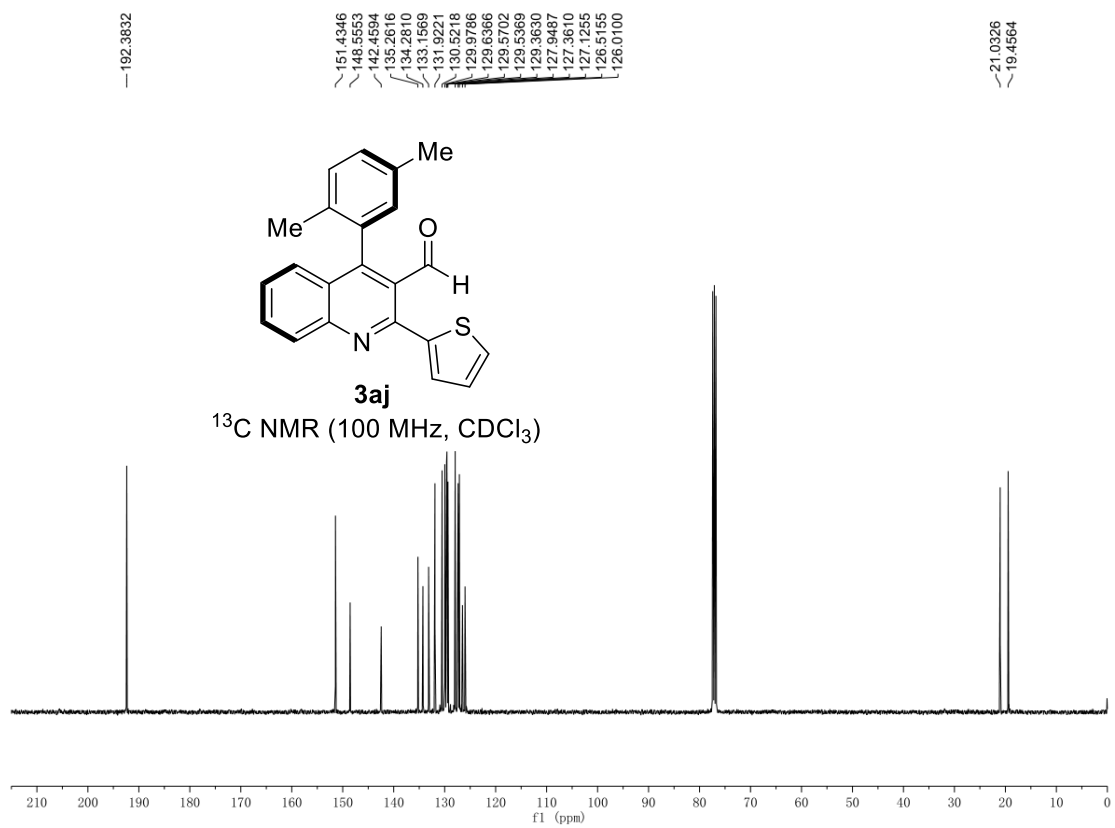



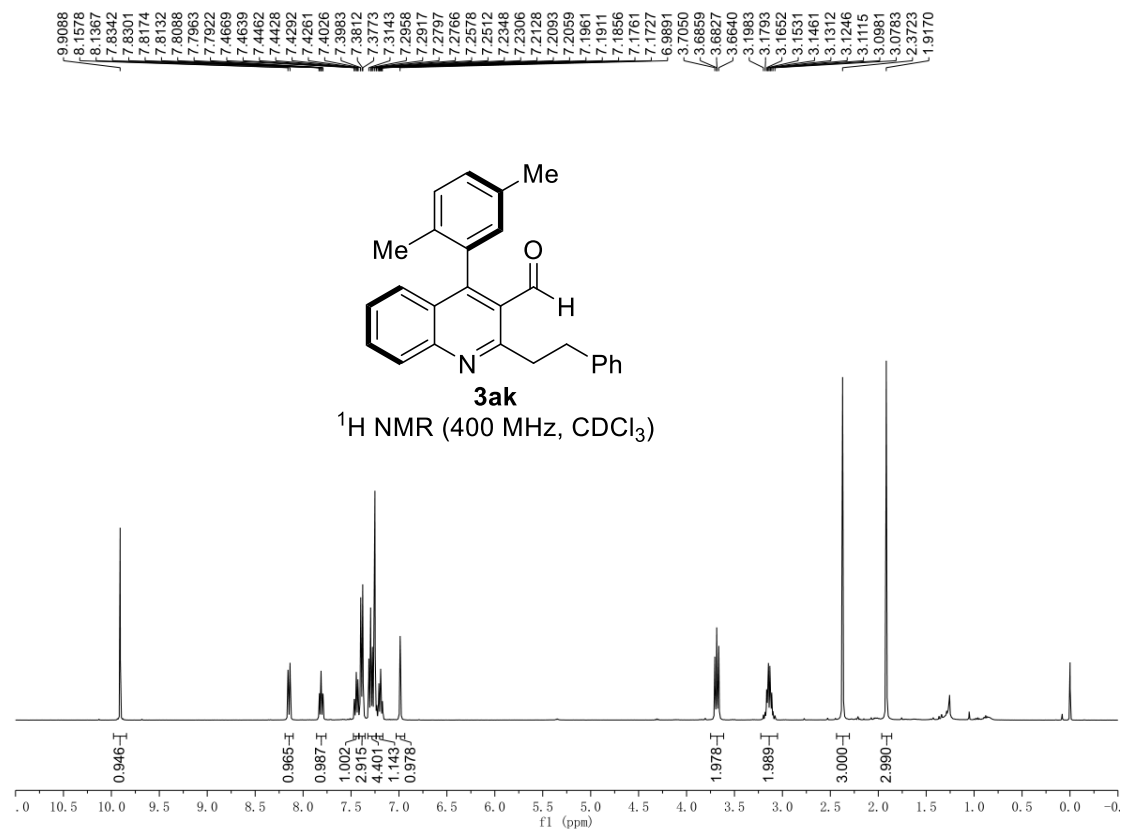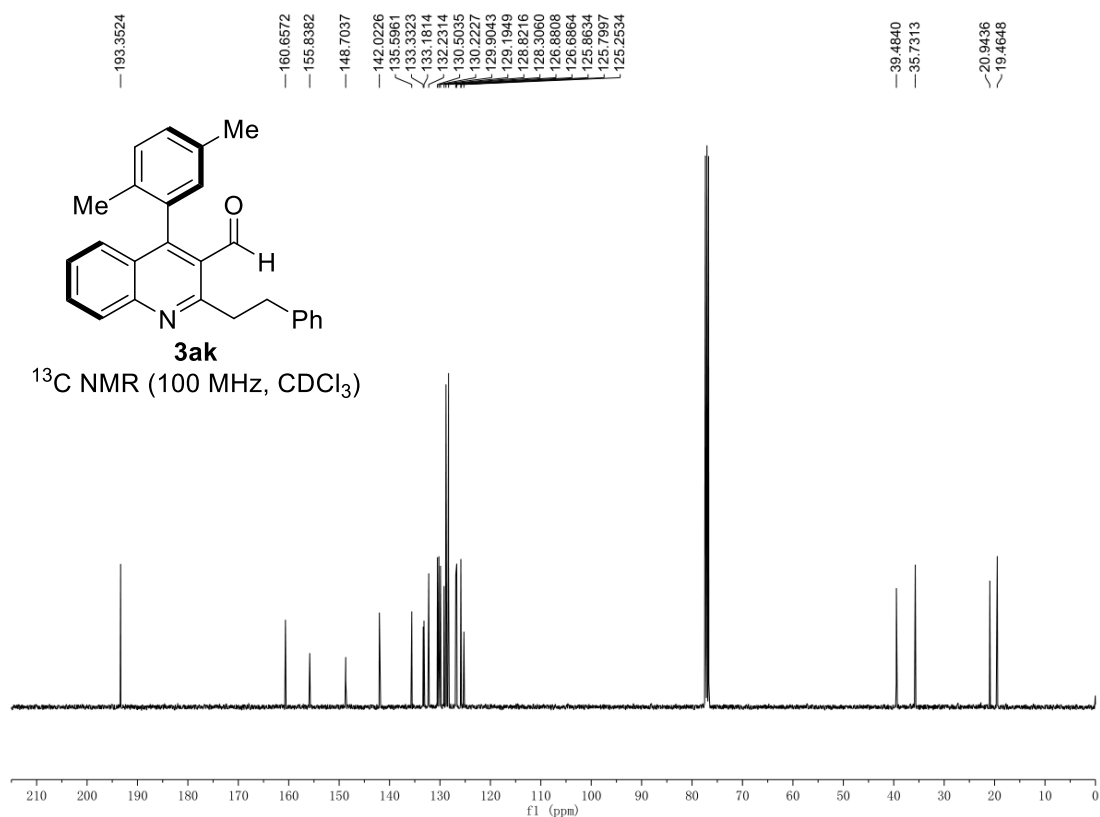

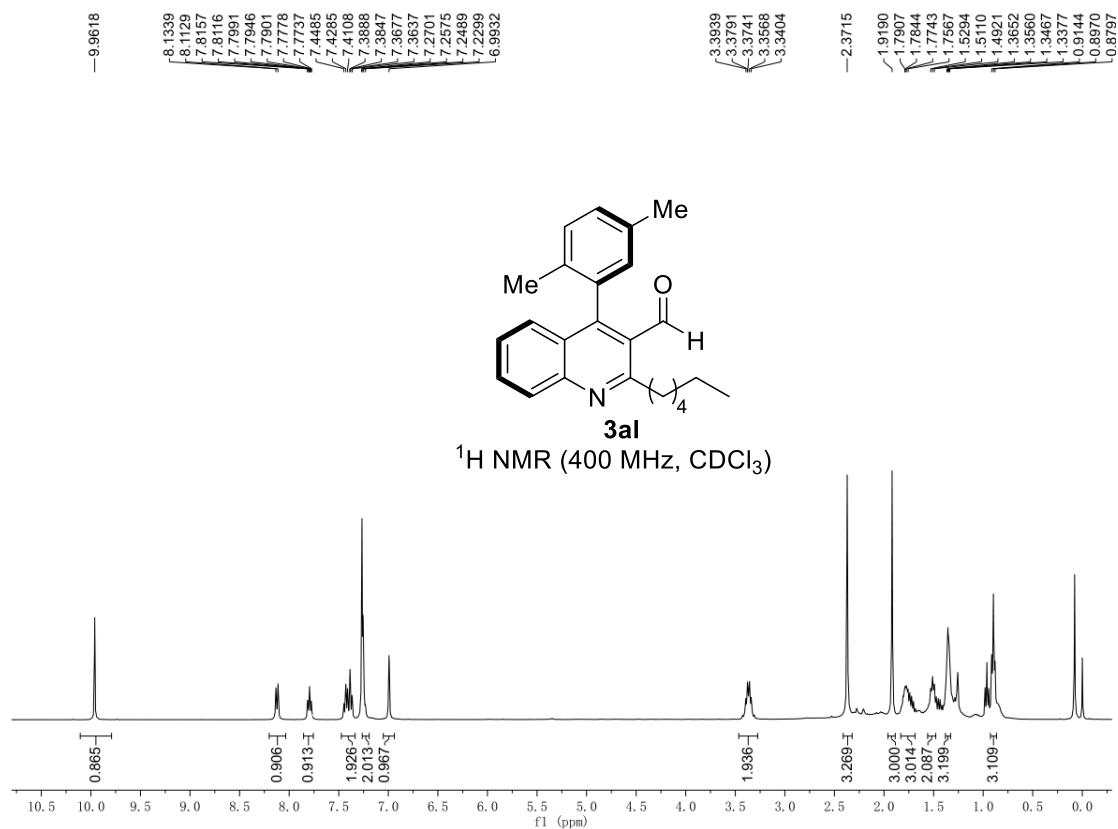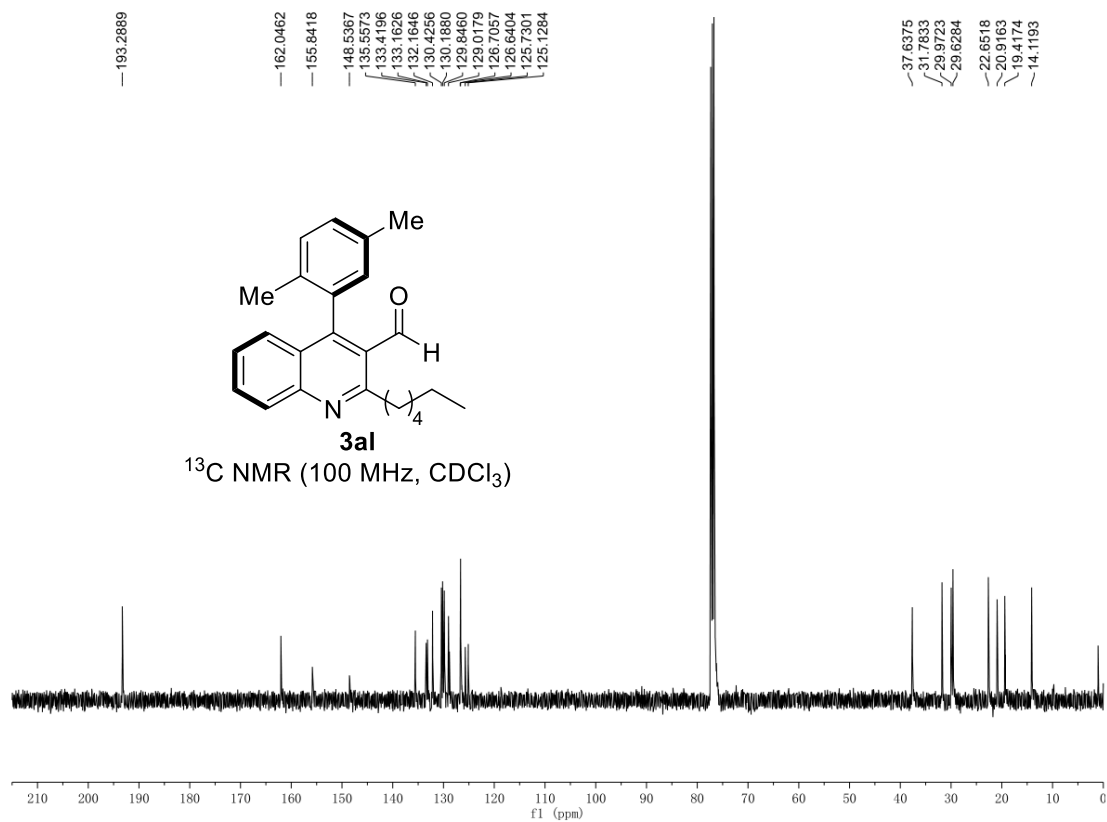

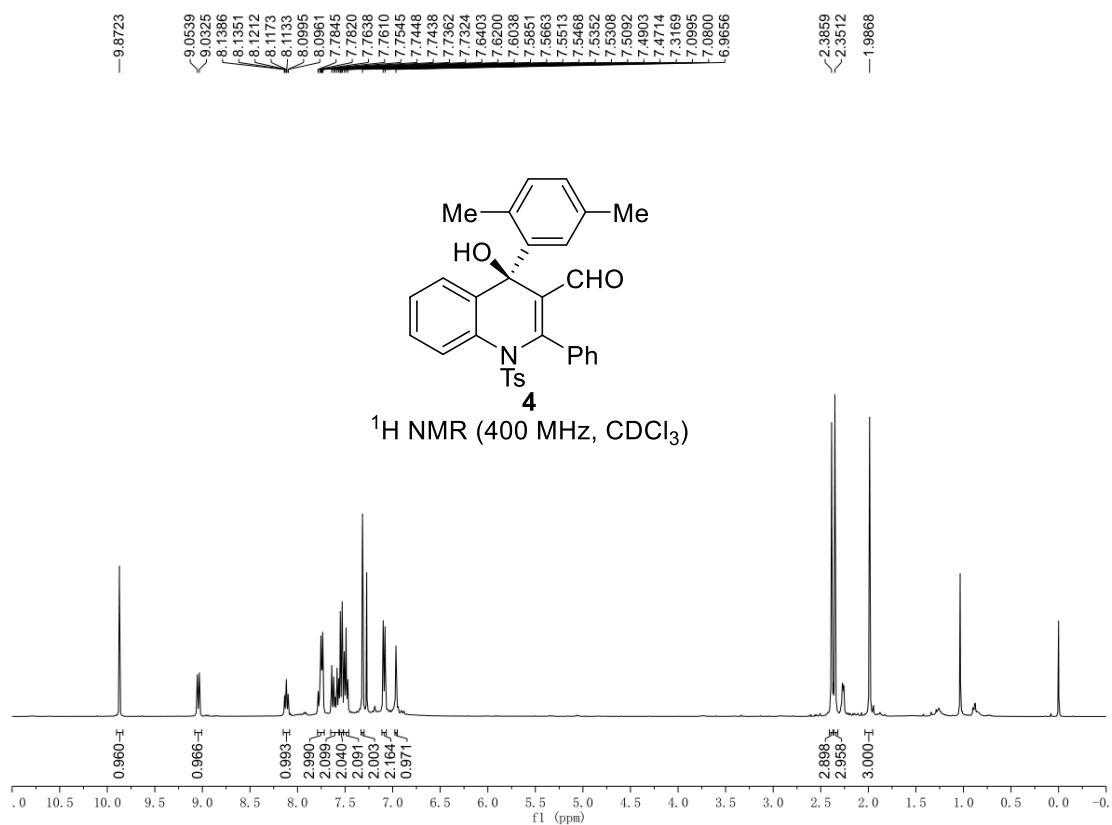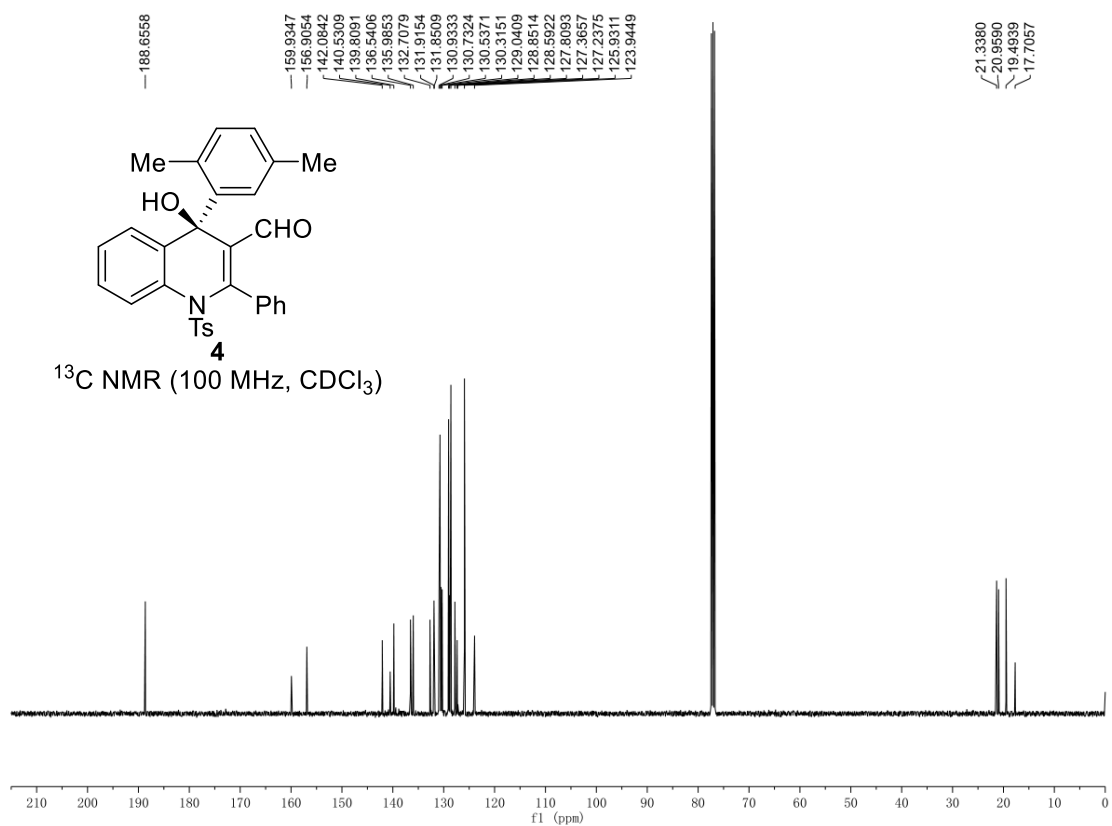

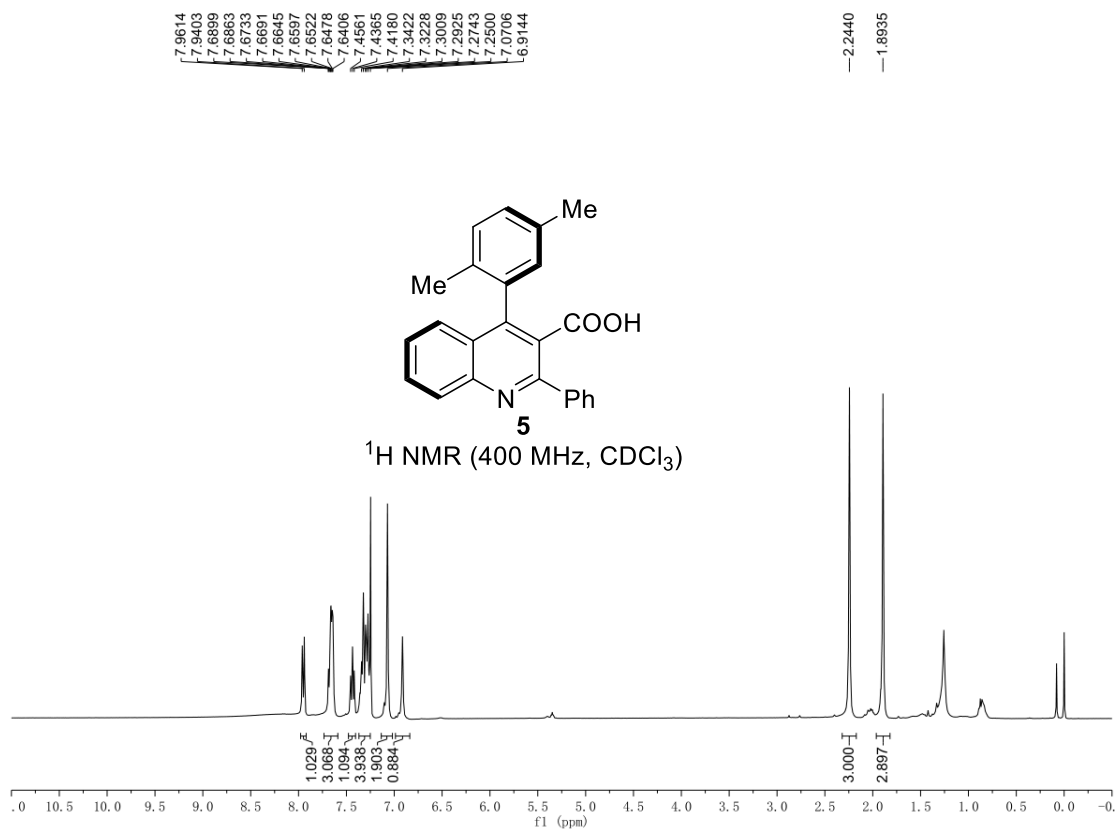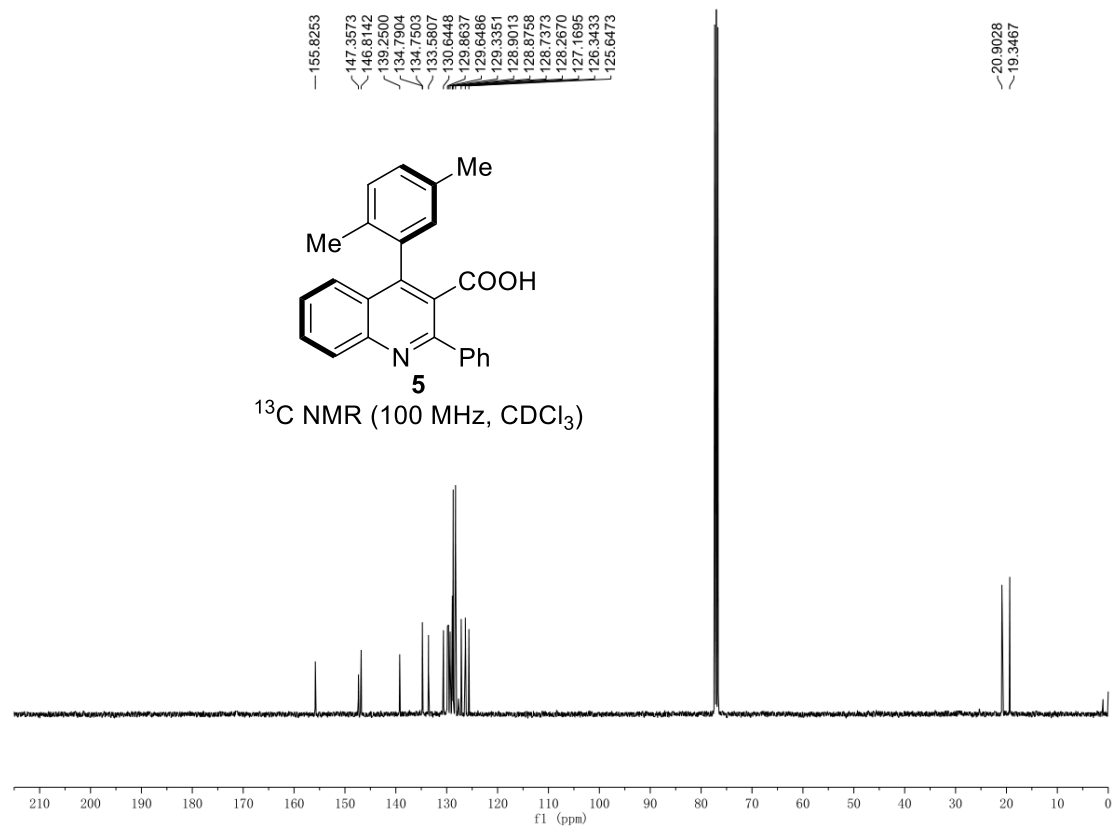

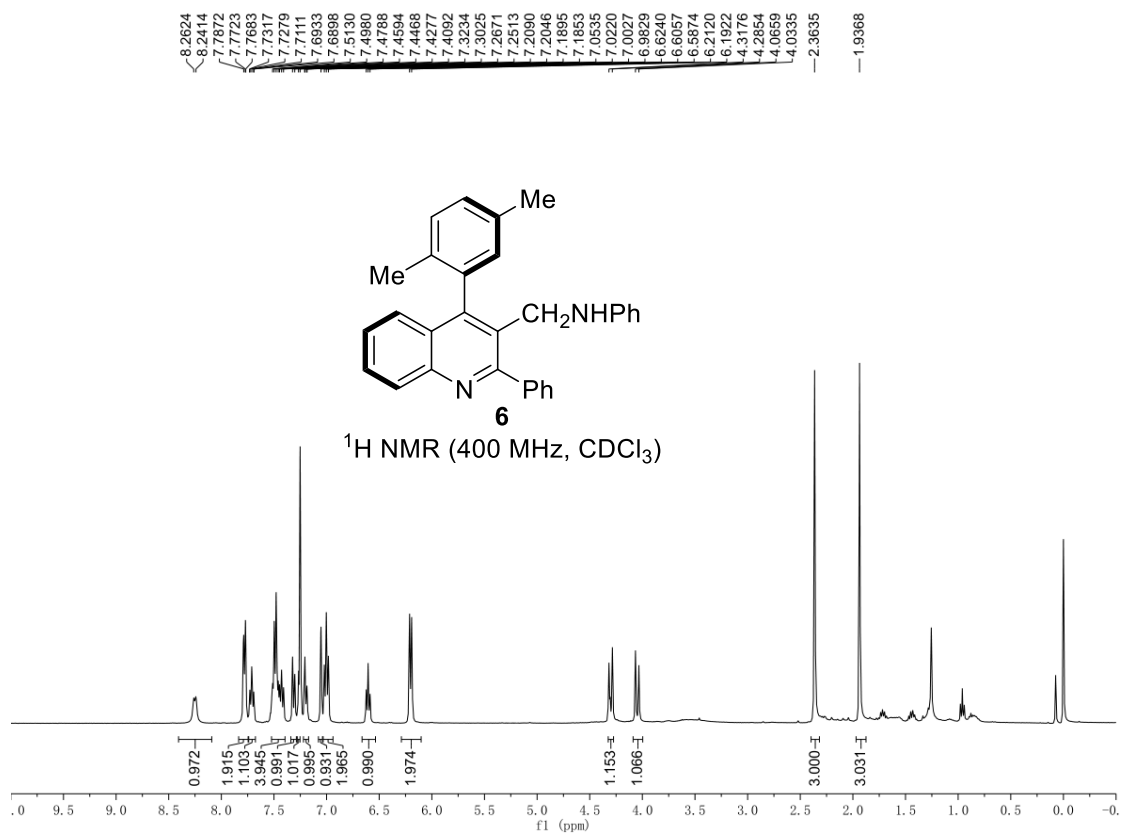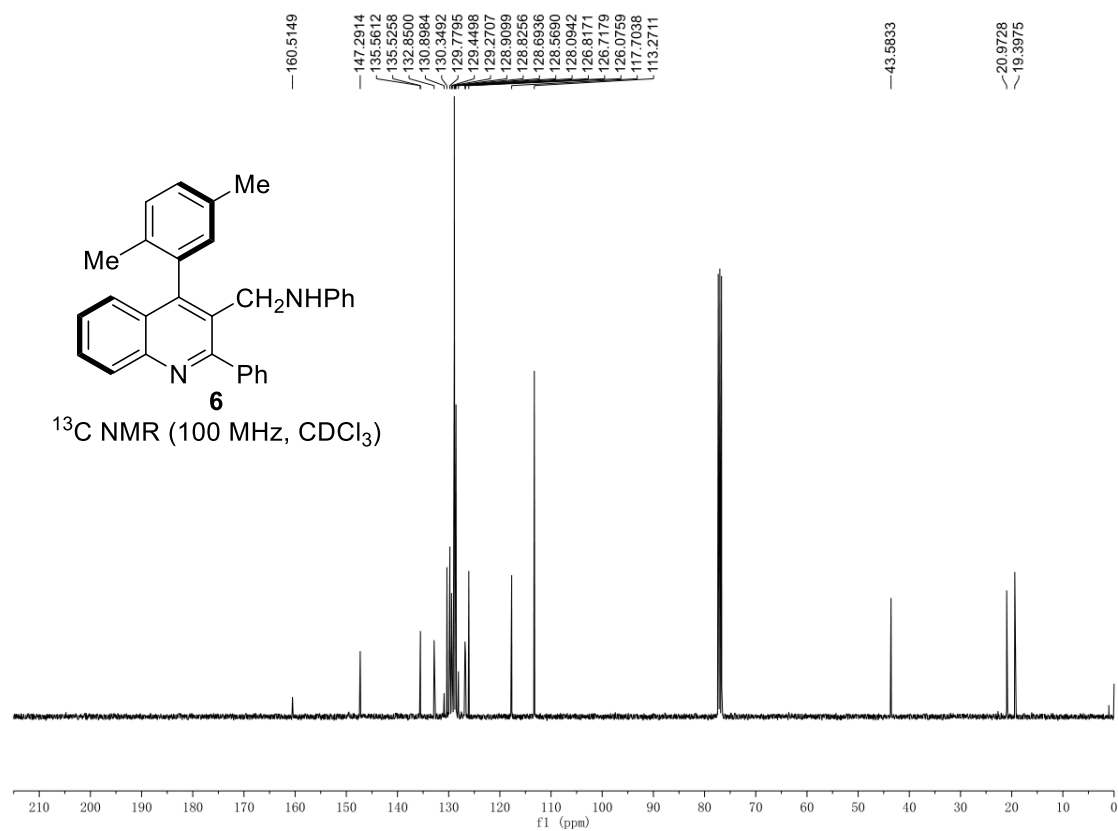

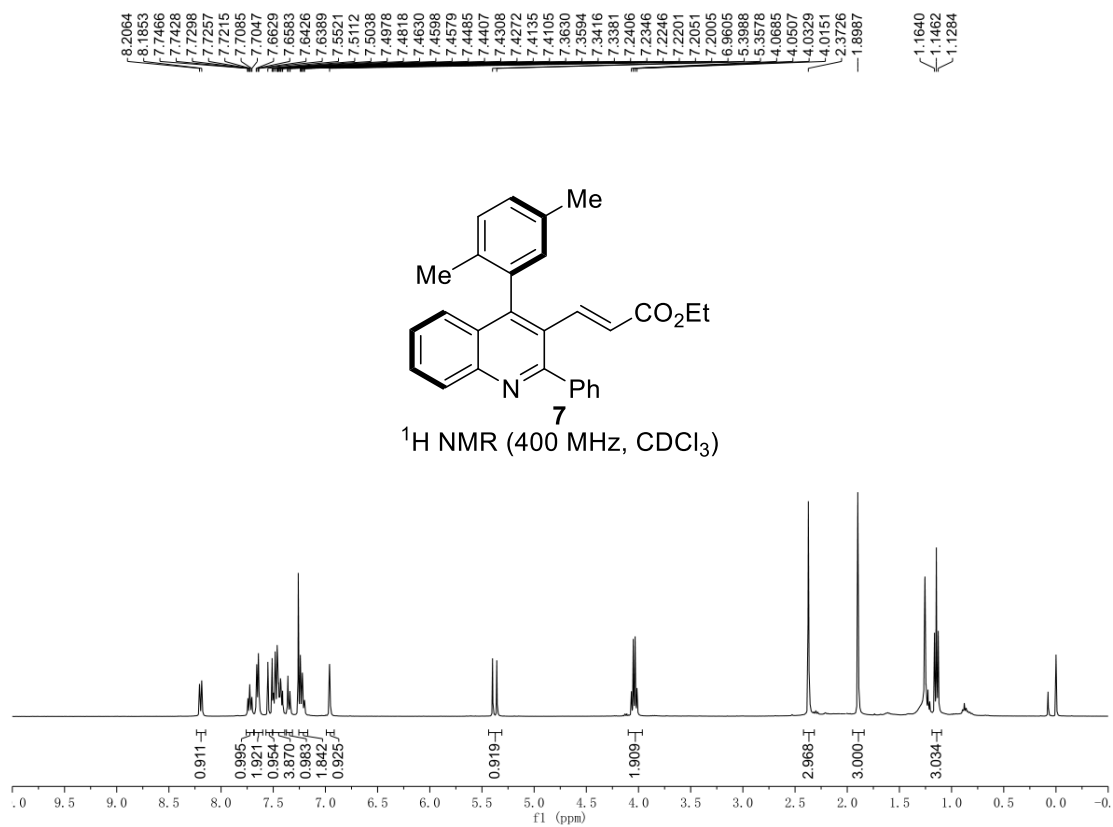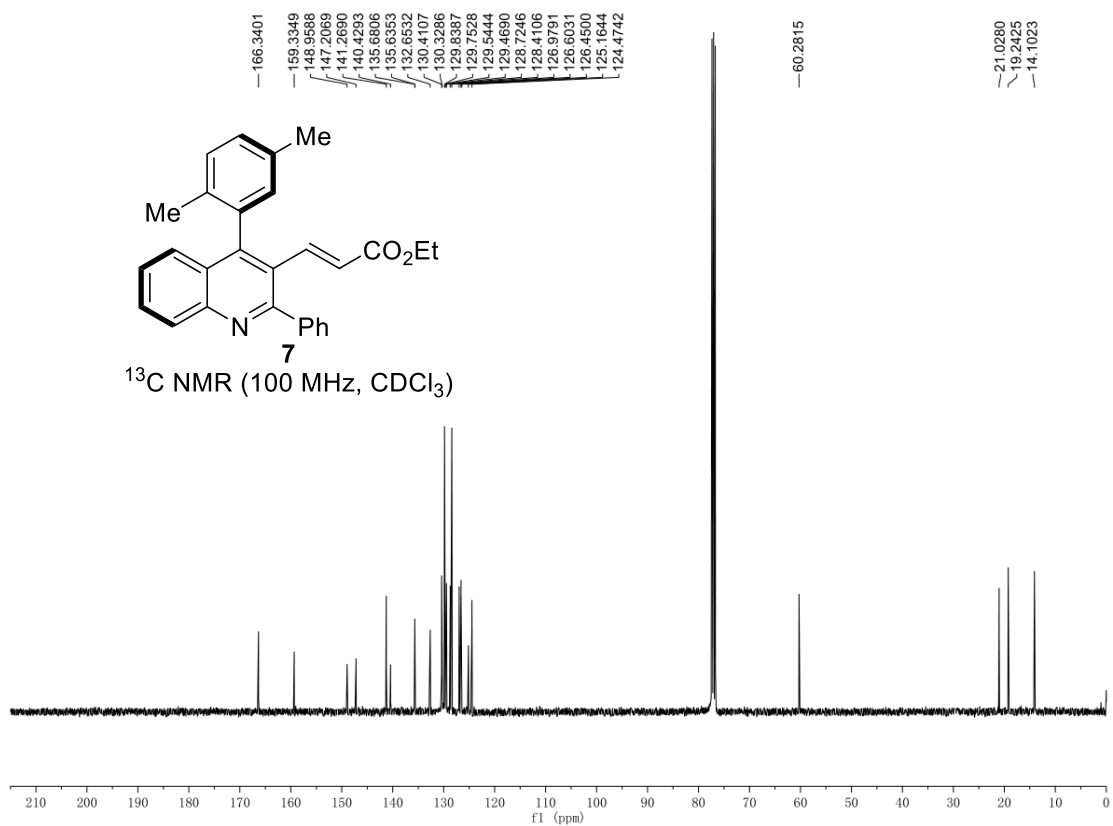

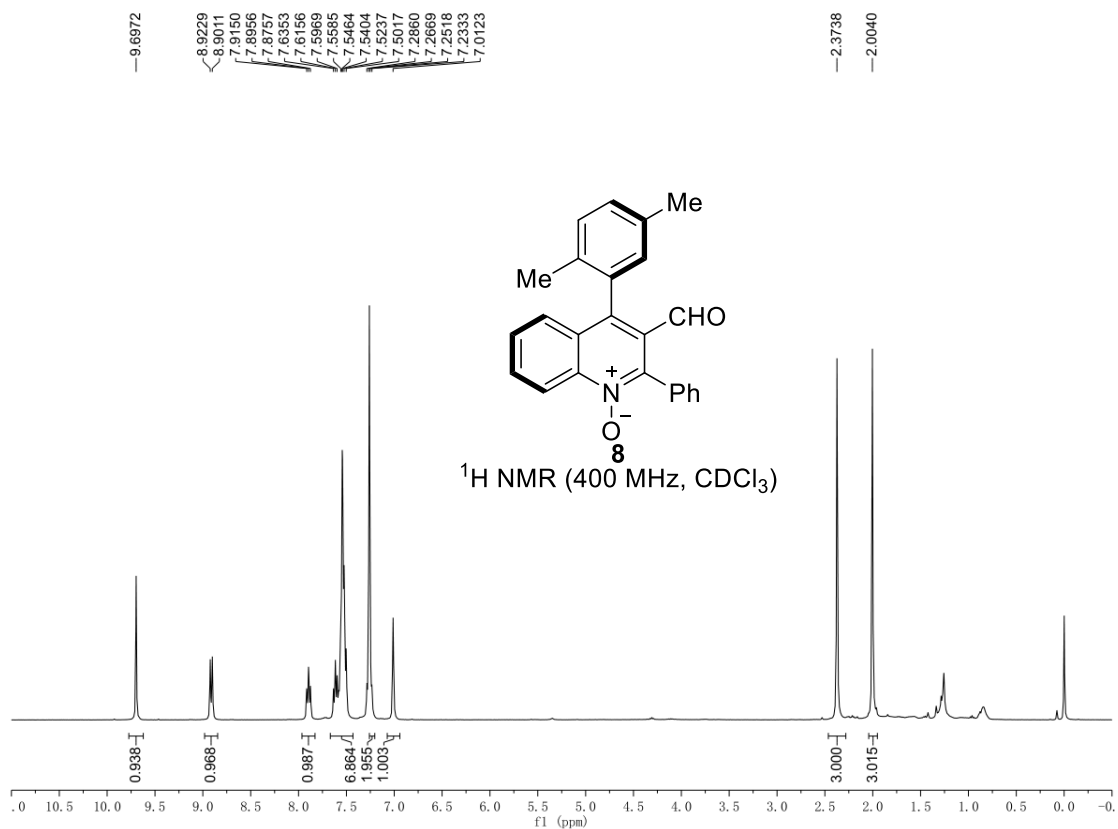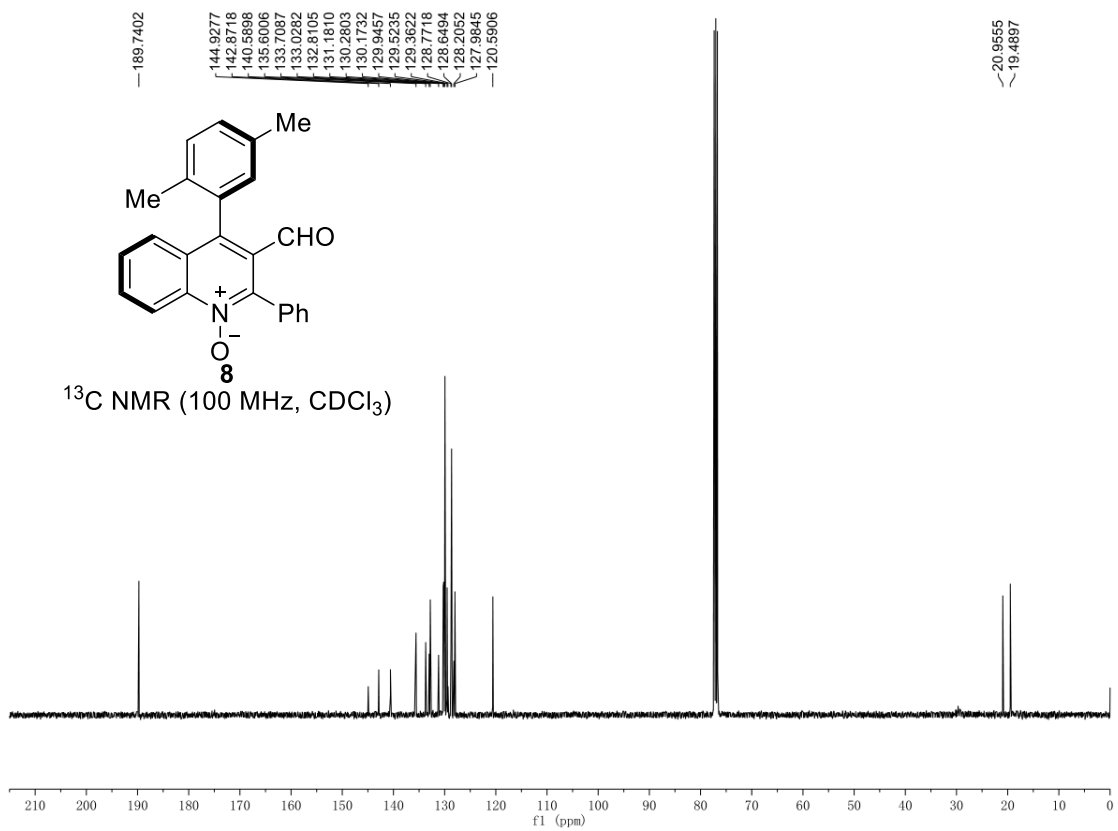

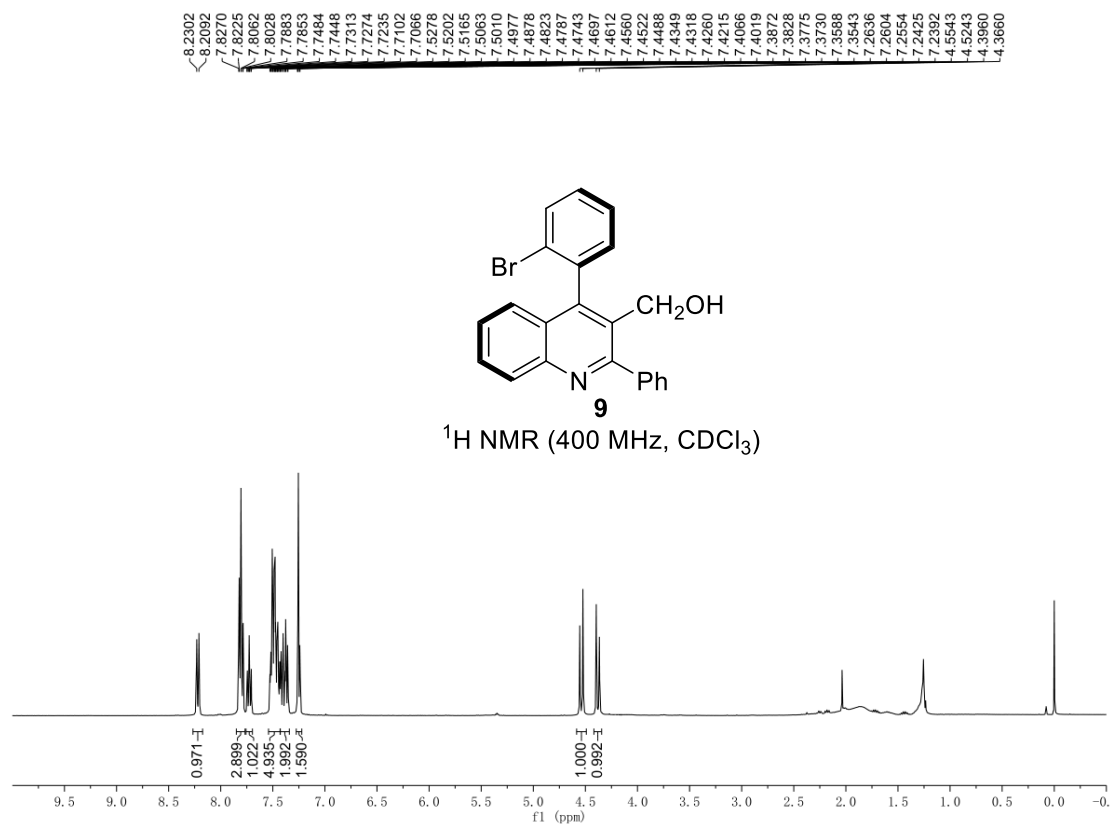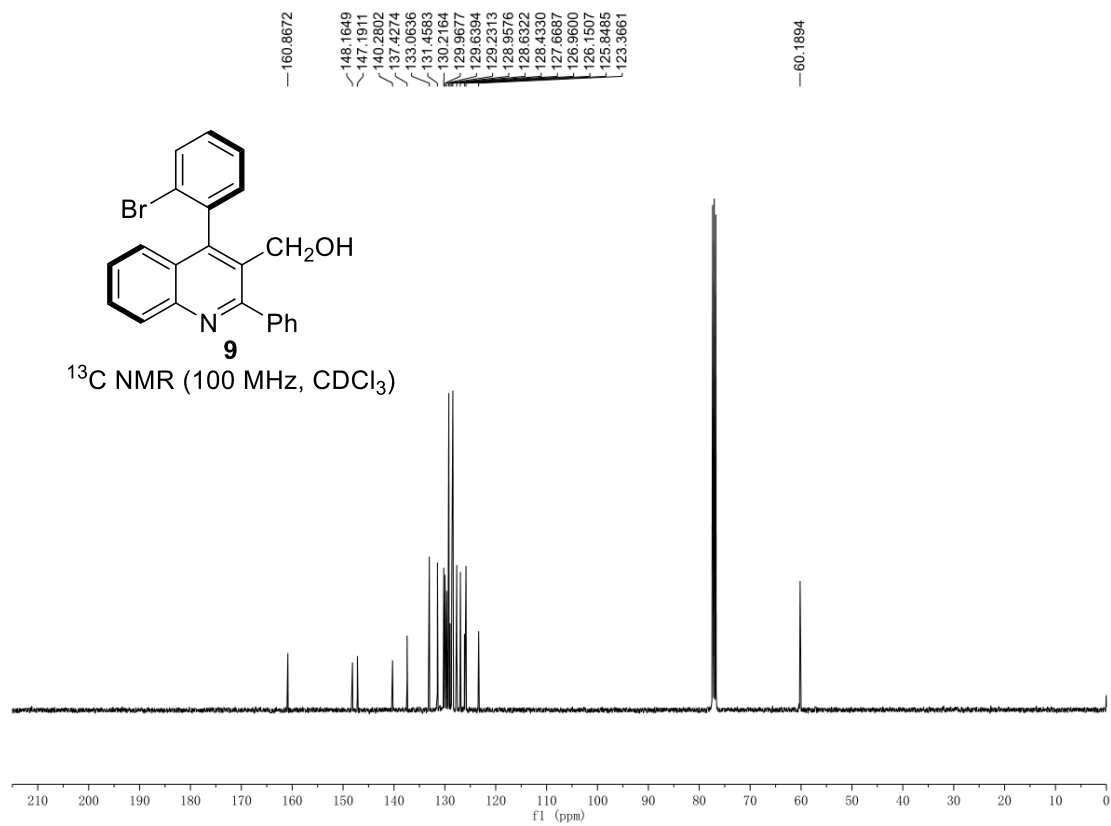



## HPLC Traces

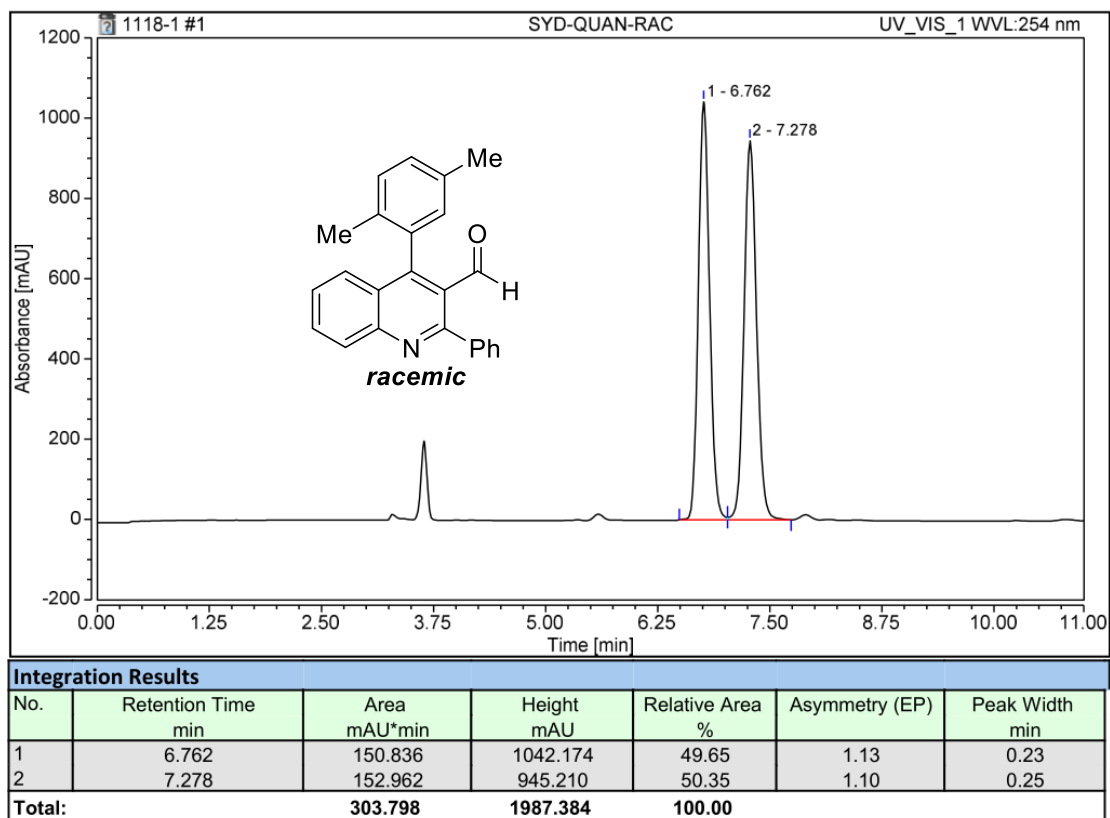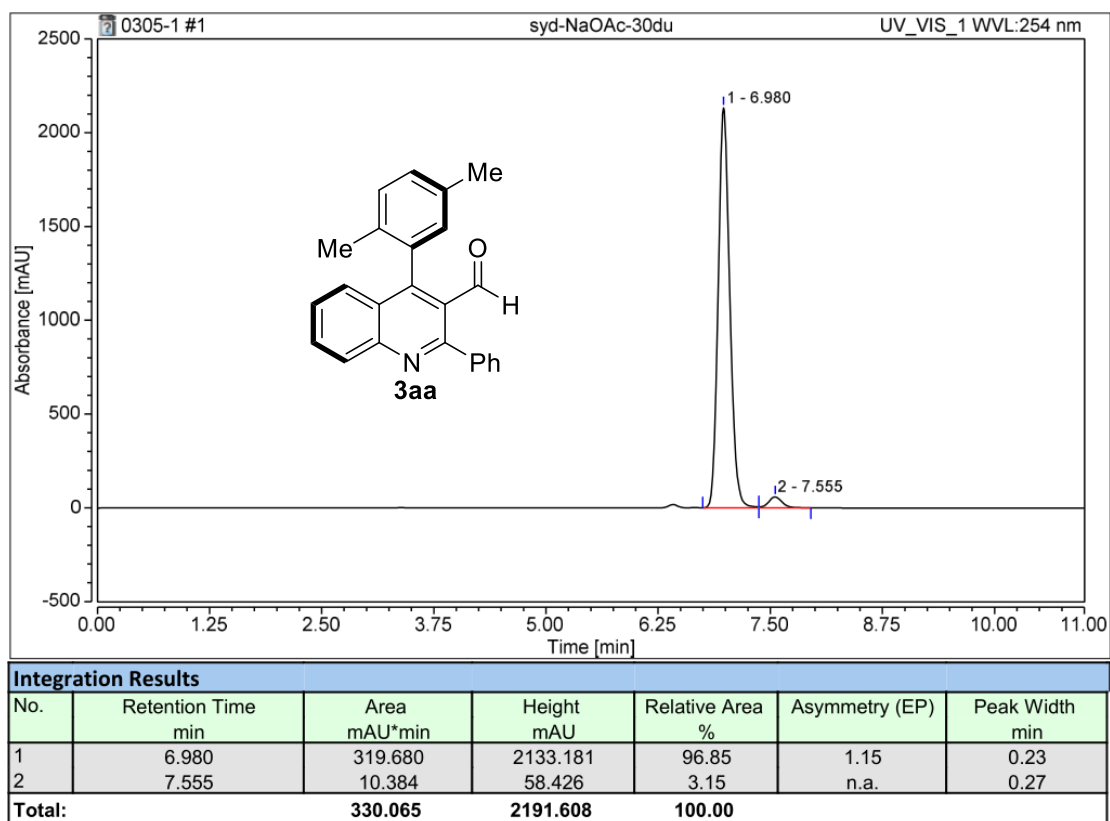

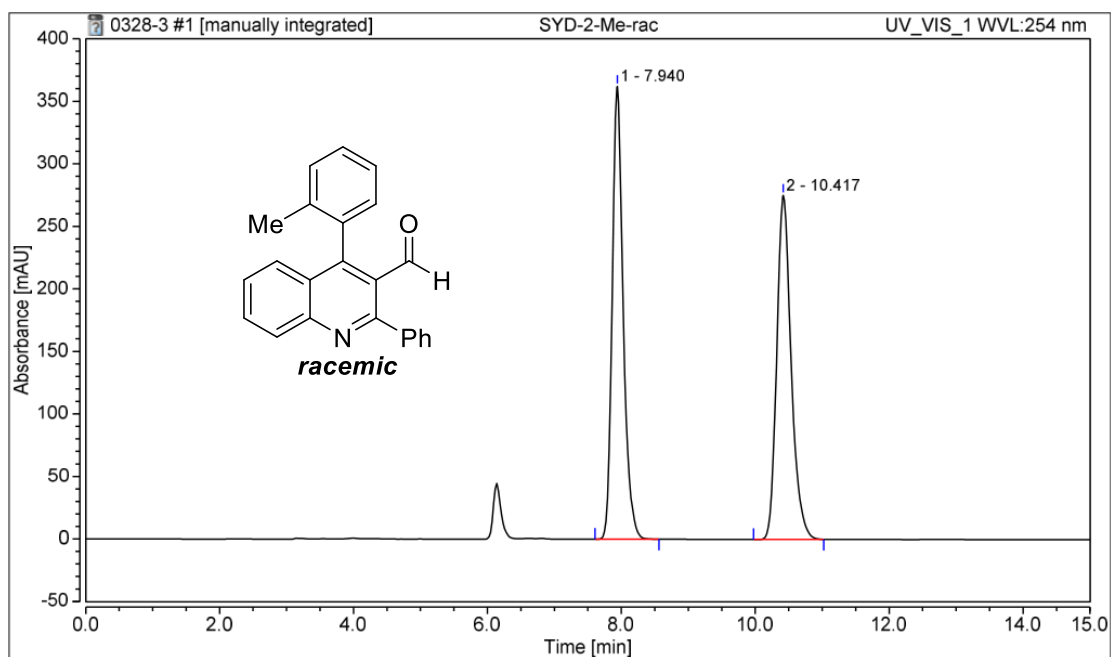

| Integration Results |                       |                 |                |                    |                |                   |
|---------------------|-----------------------|-----------------|----------------|--------------------|----------------|-------------------|
| No.                 | Retention Time<br>min | Area<br>mAU*min | Height<br>mAU  | Relative Area<br>% | Asymmetry (EP) | Peak Width<br>min |
| 1                   | 7.940                 | 68.695          | 362.158        | 50.18              | 1.26           | 0.29              |
| 2                   | 10.417                | 68.205          | 275.296        | 49.82              | 1.26           | 0.37              |
| <b>Total:</b>       |                       | <b>136.900</b>  | <b>637.455</b> | <b>100.00</b>      |                |                   |

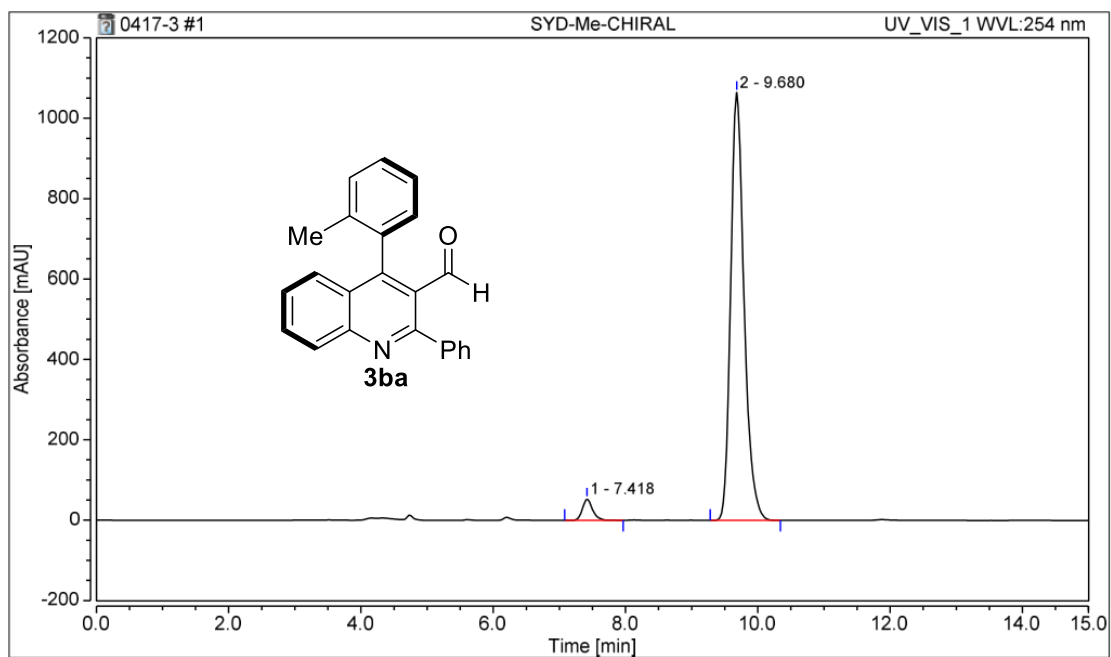

| Integration Results |                       |                 |                 |                    |                |                   |
|---------------------|-----------------------|-----------------|-----------------|--------------------|----------------|-------------------|
| No.                 | Retention Time<br>min | Area<br>mAU*min | Height<br>mAU   | Relative Area<br>% | Asymmetry (EP) | Peak Width<br>min |
| 1                   | 7.418                 | 9.504           | 53.041          | 3.66               | 1.23           | 0.27              |
| 2                   | 9.680                 | 250.383         | 1064.463        | 96.34              | 1.27           | 0.36              |
| <b>Total:</b>       |                       | <b>259.887</b>  | <b>1117.505</b> | <b>100.00</b>      |                |                   |

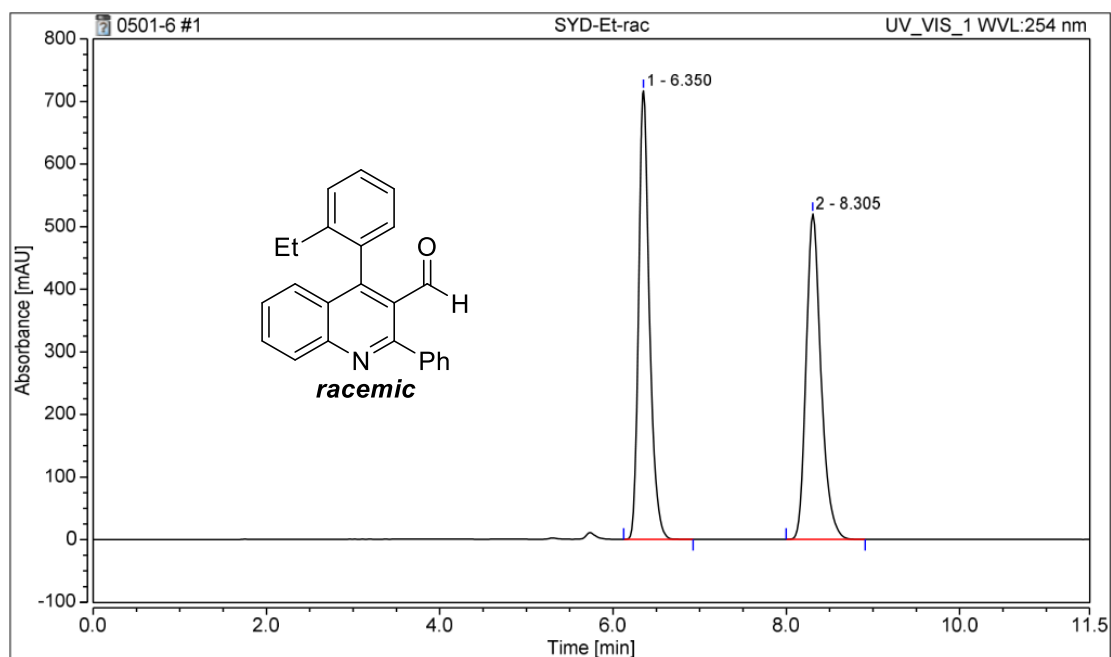

| Integration Results |                       |                 |                 |                    |                |                   |
|---------------------|-----------------------|-----------------|-----------------|--------------------|----------------|-------------------|
| No.                 | Retention Time<br>min | Area<br>mAU*min | Height<br>mAU   | Relative Area<br>% | Asymmetry (EP) | Peak Width<br>min |
| 1                   | 6.350                 | 103.701         | 716.868         | 49.99              | 1.30           | 0.22              |
| 2                   | 8.305                 | 103.740         | 520.343         | 50.01              | 1.28           | 0.31              |
| <b>Total:</b>       |                       | <b>207.441</b>  | <b>1237.211</b> | <b>100.00</b>      |                |                   |

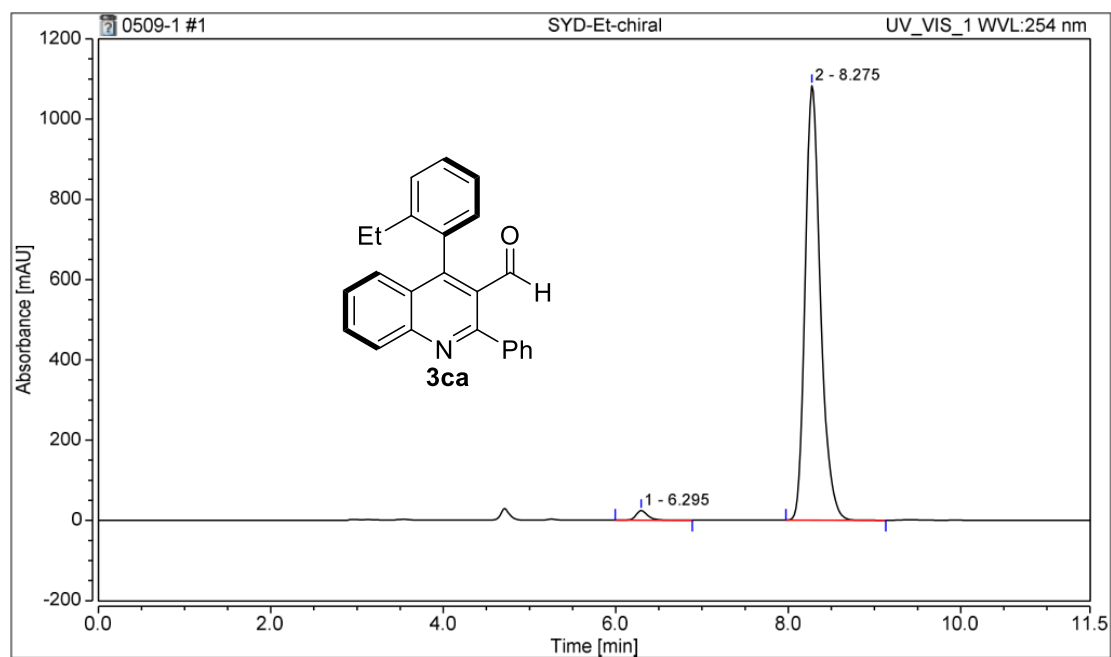

| Integration Results |                       |                 |                 |                    |                |                   |
|---------------------|-----------------------|-----------------|-----------------|--------------------|----------------|-------------------|
| No.                 | Retention Time<br>min | Area<br>mAU*min | Height<br>mAU   | Relative Area<br>% | Asymmetry (EP) | Peak Width<br>min |
| 1                   | 6.295                 | 3.753           | 23.917          | 1.65               | 1.27           | 0.24              |
| 2                   | 8.275                 | 223.022         | 1082.979        | 98.35              | 1.28           | 0.31              |
| <b>Total:</b>       |                       | <b>226.775</b>  | <b>1106.896</b> | <b>100.00</b>      |                |                   |

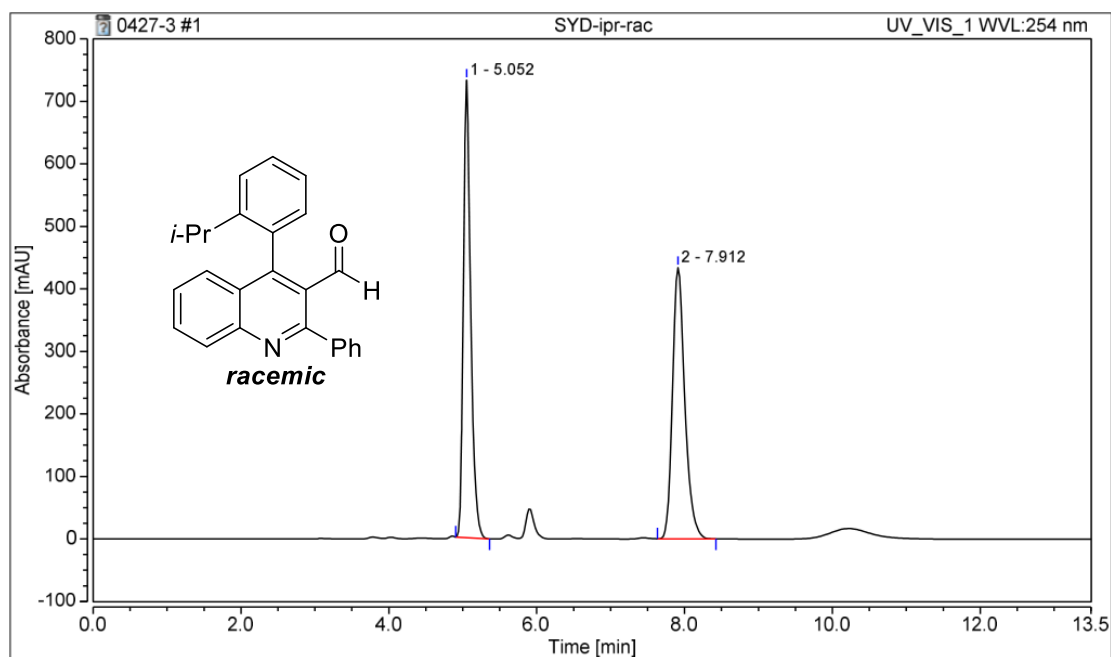

| Integration Results |                       |                 |               |                    |                |                   |
|---------------------|-----------------------|-----------------|---------------|--------------------|----------------|-------------------|
| No.                 | Retention Time<br>min | Area<br>mAU*min | Height<br>mAU | Relative Area<br>% | Asymmetry (EP) | Peak Width<br>min |
| 1                   | 5.052                 | 83.727          | 731.893       | 49.96              | 1.33           | 0.18              |
| 2                   | 7.912                 | 83.849          | 434.128       | 50.04              | 1.27           | 0.30              |
| Total:              |                       | 167.575         | 1166.021      | 100.00             |                |                   |

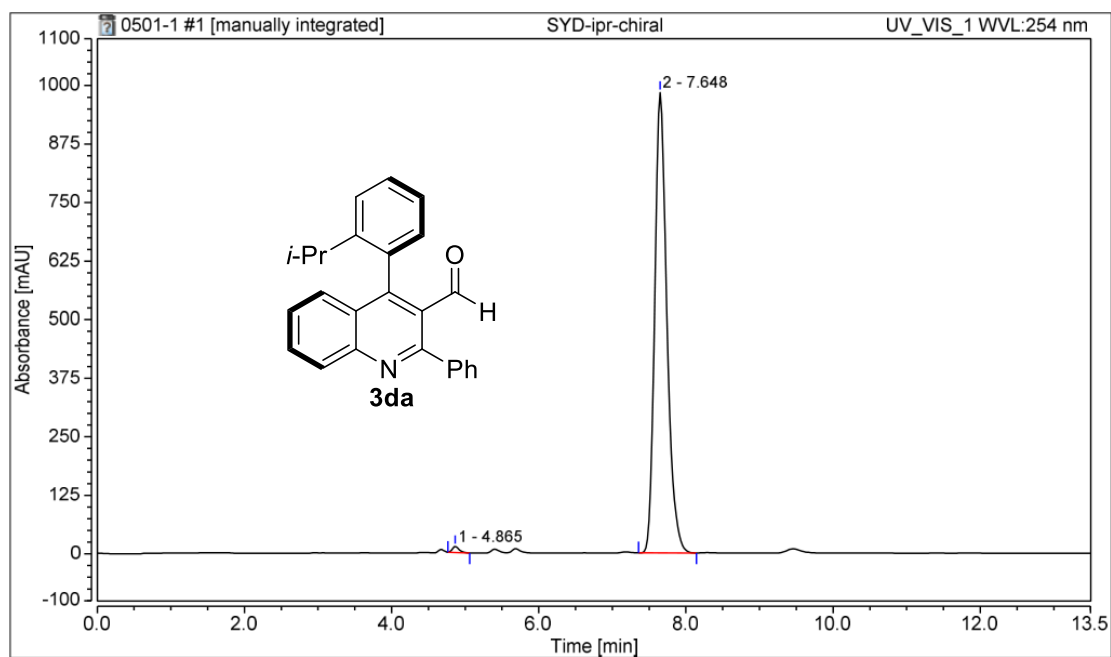

| Integration Results |                       |                 |               |                    |                |                   |
|---------------------|-----------------------|-----------------|---------------|--------------------|----------------|-------------------|
| No.                 | Retention Time<br>min | Area<br>mAU*min | Height<br>mAU | Relative Area<br>% | Asymmetry (EP) | Peak Width<br>min |
| 1                   | 4.865                 | 1.309           | 12.873        | 0.69               | 1.33           | 0.16              |
| 2                   | 7.648                 | 188.421         | 983.340       | 99.31              | 1.28           | 0.29              |
| Total:              |                       | 189.730         | 996.213       | 100.00             |                |                   |

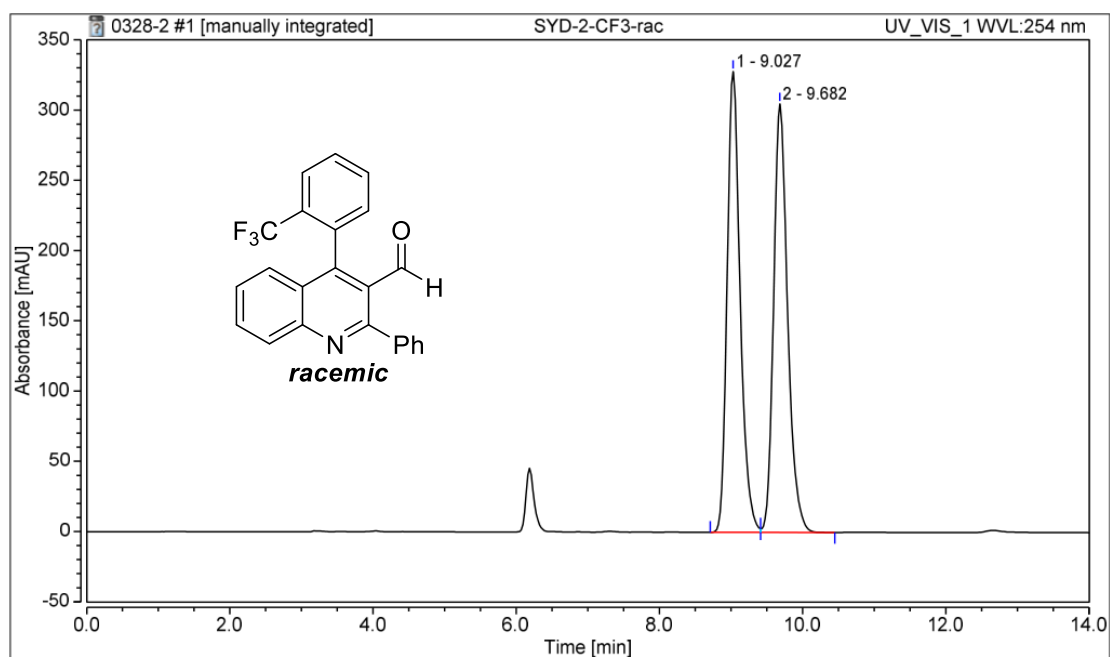

| Integration Results |                       |                 |                |                    |                |                   |
|---------------------|-----------------------|-----------------|----------------|--------------------|----------------|-------------------|
| No.                 | Retention Time<br>min | Area<br>mAU*min | Height<br>mAU  | Relative Area<br>% | Asymmetry (EP) | Peak Width<br>min |
| 1                   | 9.027                 | 68.906          | 327.979        | 49.94              | 1.25           | 0.33              |
| 2                   | 9.682                 | 69.086          | 304.935        | 50.06              | 1.25           | 0.34              |
| <b>Total:</b>       |                       | <b>137.992</b>  | <b>632.914</b> | <b>100.00</b>      |                |                   |

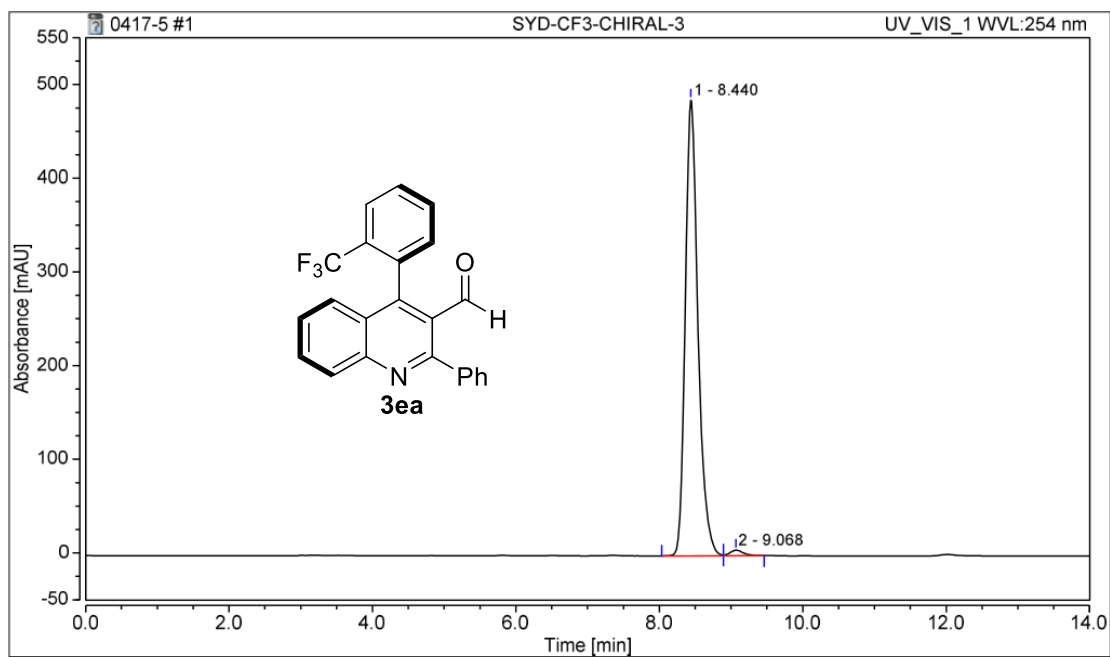

| Integration Results |                       |                 |                |                    |                |                   |
|---------------------|-----------------------|-----------------|----------------|--------------------|----------------|-------------------|
| No.                 | Retention Time<br>min | Area<br>mAU*min | Height<br>mAU  | Relative Area<br>% | Asymmetry (EP) | Peak Width<br>min |
| 1                   | 8.440                 | 99.871          | 486.598        | 98.74              | 1.29           | 0.31              |
| 2                   | 9.068                 | 1.279           | 5.953          | 1.26               | n.a.           | 0.33              |
| <b>Total:</b>       |                       | <b>101.150</b>  | <b>492.551</b> | <b>100.00</b>      |                |                   |

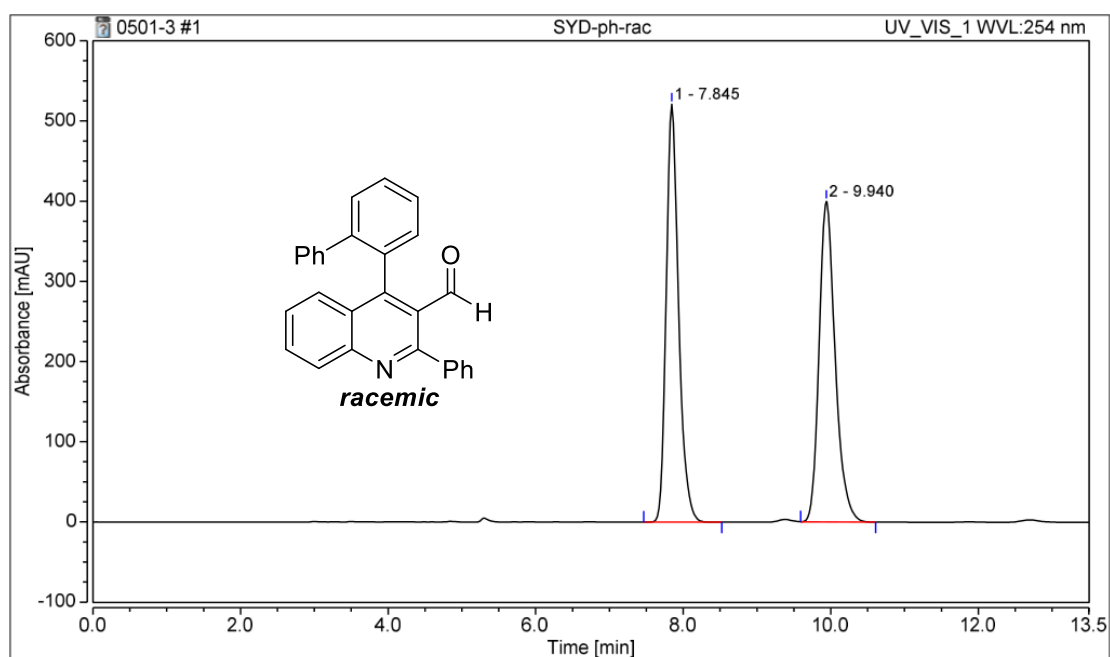

| Integration Results |                       |                 |               |                    |                |                   |
|---------------------|-----------------------|-----------------|---------------|--------------------|----------------|-------------------|
| No.                 | Retention Time<br>min | Area<br>mAU*min | Height<br>mAU | Relative Area<br>% | Asymmetry (EP) | Peak Width<br>min |
| 1                   | 7.845                 | 101.431         | 521.248       | 50.06              | 1.27           | 0.30              |
| 2                   | 9.940                 | 101.172         | 399.857       | 49.94              | 1.26           | 0.39              |
| Total:              |                       | 202.603         | 921.105       | 100.00             |                |                   |

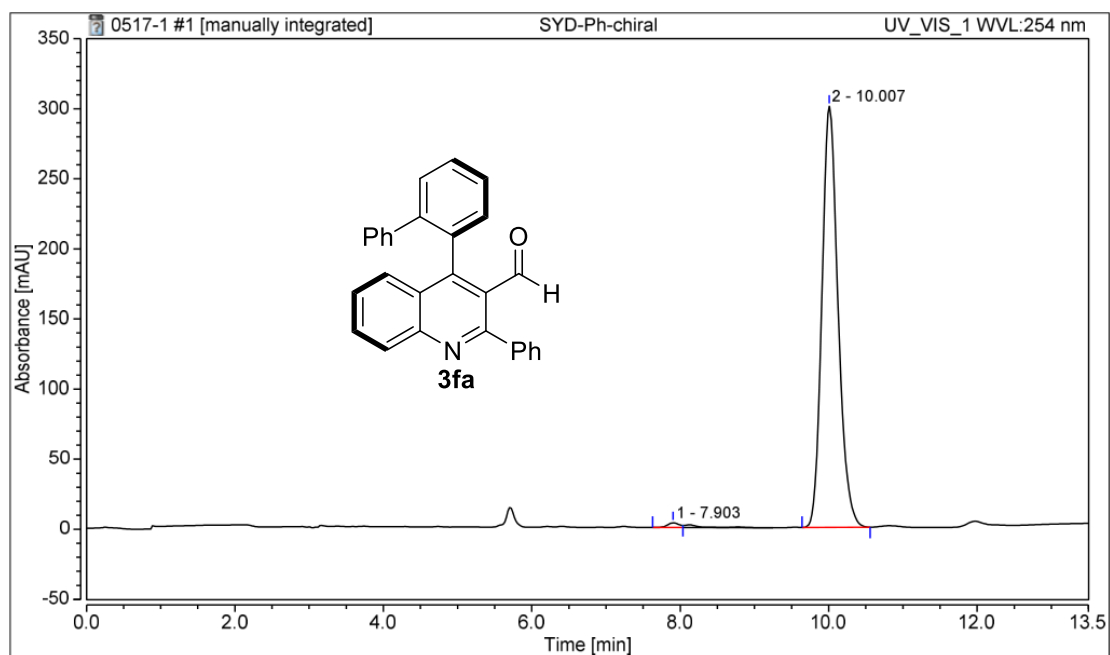

| Integration Results |                       |                 |               |                    |                |                   |
|---------------------|-----------------------|-----------------|---------------|--------------------|----------------|-------------------|
| No.                 | Retention Time<br>min | Area<br>mAU*min | Height<br>mAU | Relative Area<br>% | Asymmetry (EP) | Peak Width<br>min |
| 1                   | 7.903                 | 0.615           | 3.384         | 0.81               | n.a.           | 0.31              |
| 2                   | 10.007                | 75.797          | 300.497       | 99.19              | 1.20           | 0.39              |
| Total:              |                       | 76.412          | 303.881       | 100.00             |                |                   |

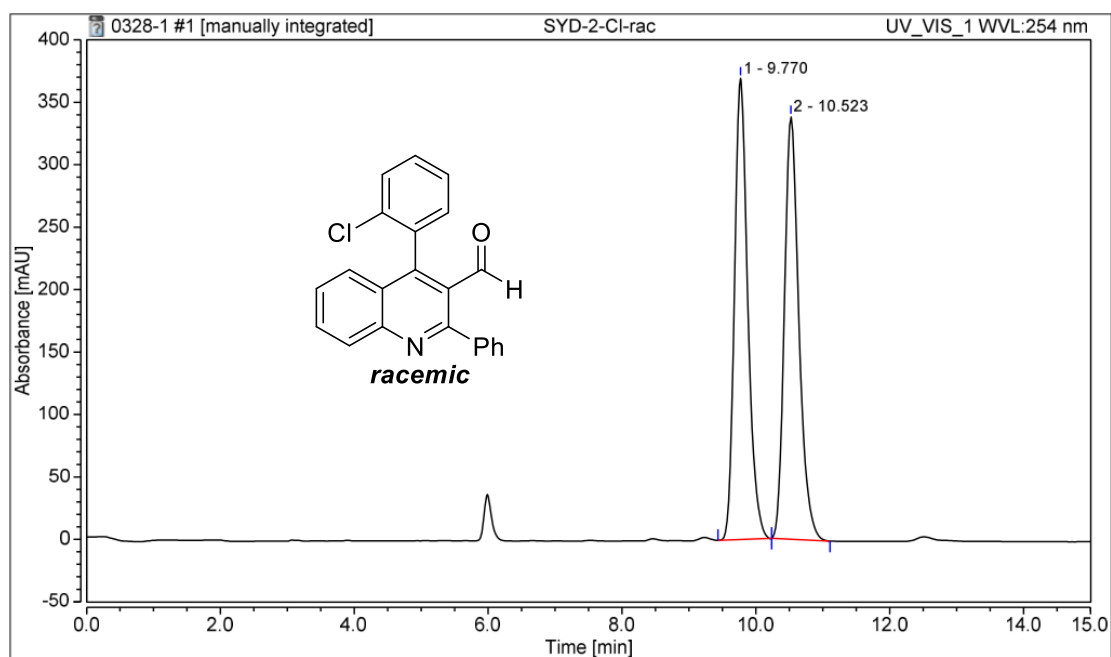

| Integration Results |                       |                 |                |                    |                |                   |
|---------------------|-----------------------|-----------------|----------------|--------------------|----------------|-------------------|
| No.                 | Retention Time<br>min | Area<br>mAU*min | Height<br>mAU  | Relative Area<br>% | Asymmetry (EP) | Peak Width<br>min |
| 1                   | 9.770                 | 85.245          | 369.383        | 49.99              | 1.24           | 0.35              |
| 2                   | 10.523                | 85.292          | 338.367        | 50.01              | 1.25           | 0.40              |
| <b>Total:</b>       |                       | <b>170.538</b>  | <b>707.750</b> | <b>100.00</b>      |                |                   |

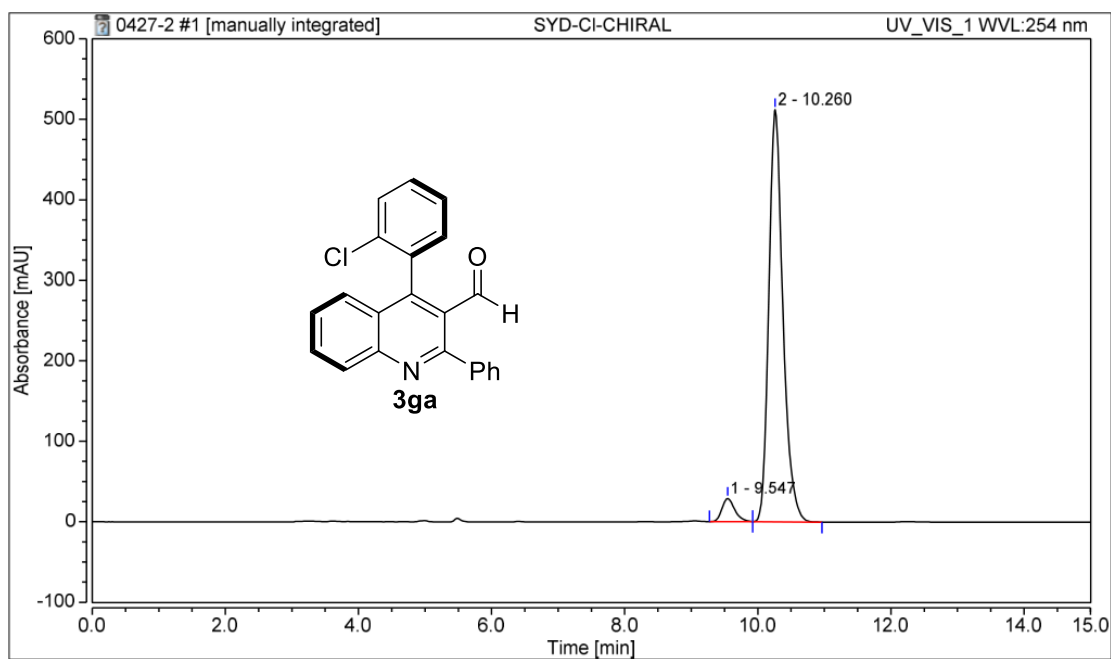

| Integration Results |                       |                 |                |                    |                |                   |
|---------------------|-----------------------|-----------------|----------------|--------------------|----------------|-------------------|
| No.                 | Retention Time<br>min | Area<br>mAU*min | Height<br>mAU  | Relative Area<br>% | Asymmetry (EP) | Peak Width<br>min |
| 1                   | 9.547                 | 6.445           | 28.928         | 4.87               | 1.30           | 0.33              |
| 2                   | 10.260                | 126.007         | 512.046        | 95.13              | 1.27           | 0.37              |
| <b>Total:</b>       |                       | <b>132.452</b>  | <b>540.973</b> | <b>100.00</b>      |                |                   |

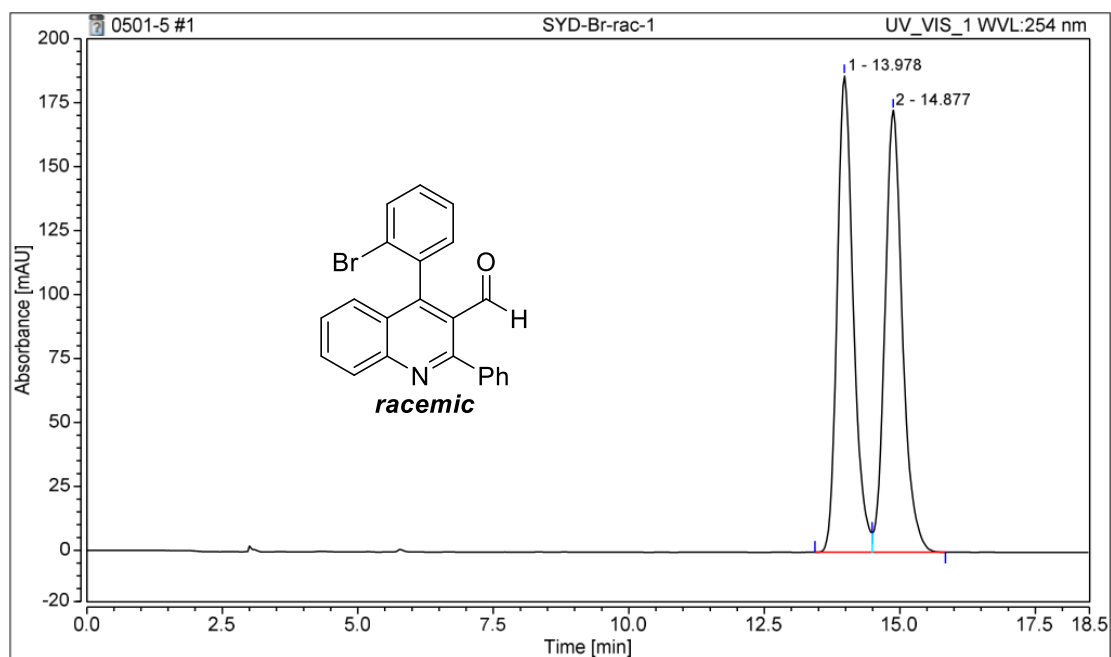

| Integration Results |                       |                 |               |                    |                |                   |
|---------------------|-----------------------|-----------------|---------------|--------------------|----------------|-------------------|
| No.                 | Retention Time<br>min | Area<br>mAU*min | Height<br>mAU | Relative Area<br>% | Asymmetry (EP) | Peak Width<br>min |
| 1                   | 13.978                | 64.280          | 186.293       | 49.78              | 1.27           | 0.53              |
| 2                   | 14.877                | 64.853          | 172.759       | 50.22              | 1.18           | 0.57              |
| Total:              |                       | 129.132         | 359.053       | 100.00             |                |                   |

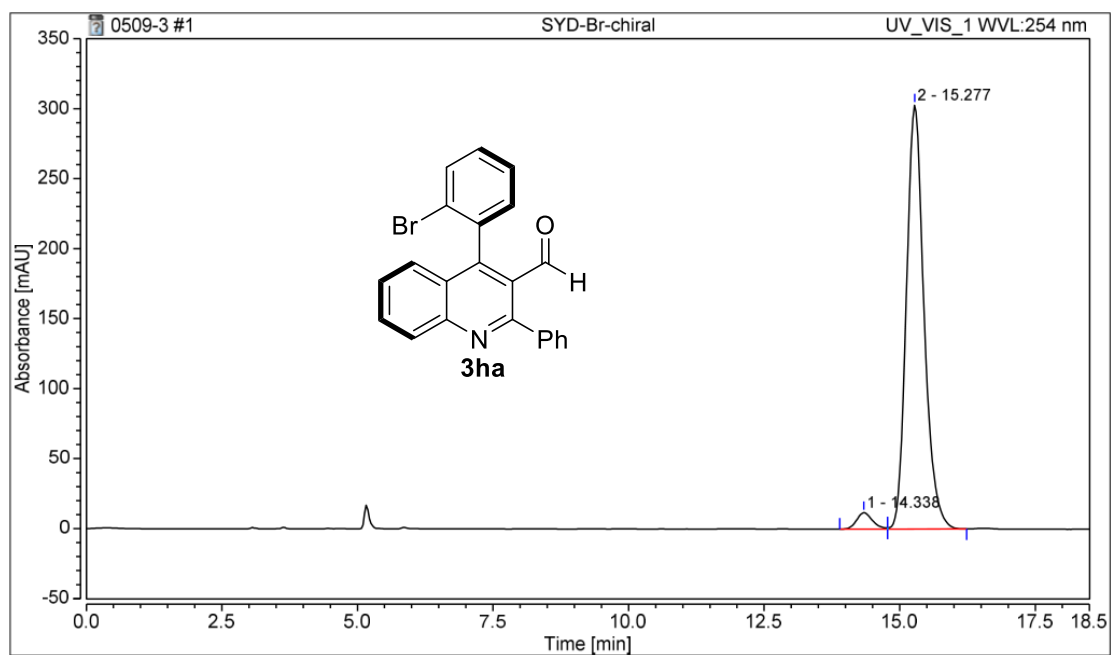

| Integration Results |                       |                 |               |                    |                |                   |
|---------------------|-----------------------|-----------------|---------------|--------------------|----------------|-------------------|
| No.                 | Retention Time<br>min | Area<br>mAU*min | Height<br>mAU | Relative Area<br>% | Asymmetry (EP) | Peak Width<br>min |
| 1                   | 14.338                | 3.983           | 11.806        | 3.36               | n.a.           | 0.52              |
| 2                   | 15.277                | 114.374         | 303.039       | 96.64              | 1.20           | 0.58              |
| Total:              |                       | 118.357         | 314.845       | 100.00             |                |                   |



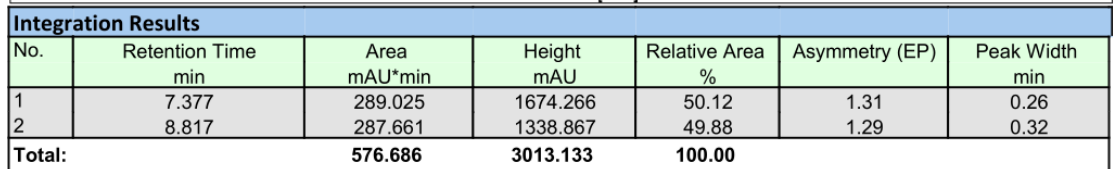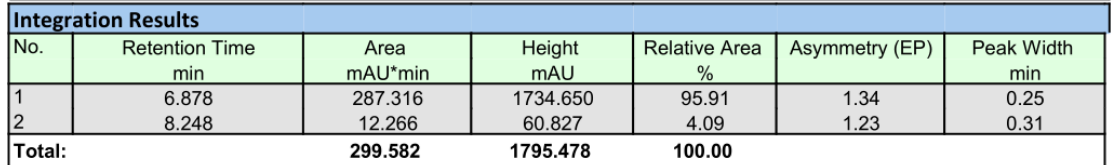

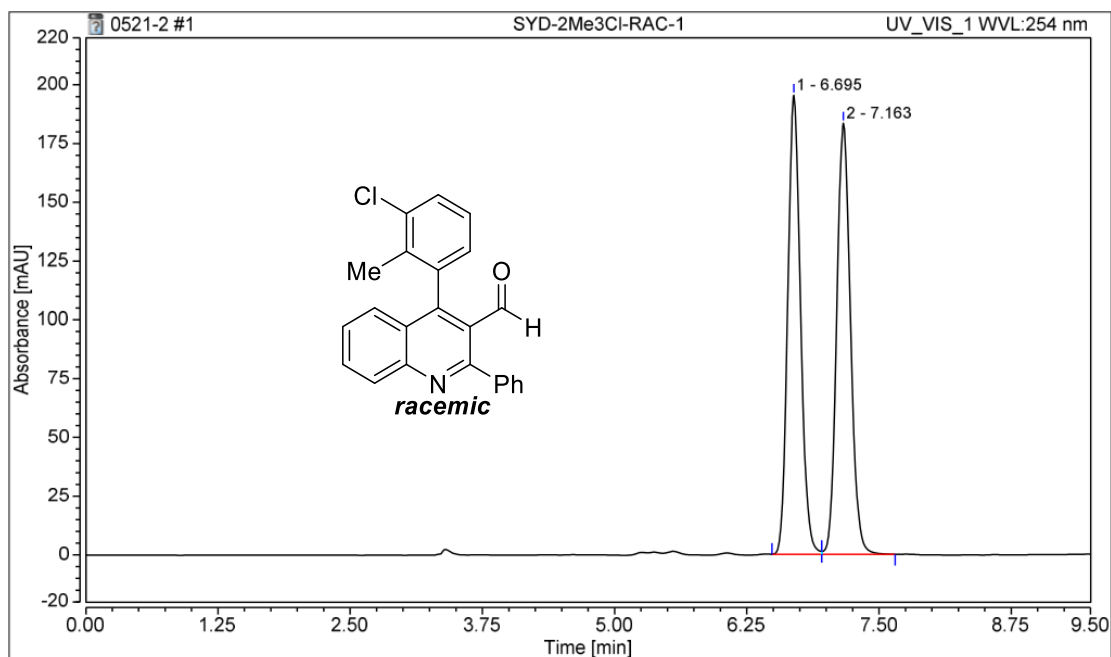

| Integration Results |                       |                 |               |                    |                |                   |
|---------------------|-----------------------|-----------------|---------------|--------------------|----------------|-------------------|
| No.                 | Retention Time<br>min | Area<br>mAU*min | Height<br>mAU | Relative Area<br>% | Asymmetry (EP) | Peak Width<br>min |
| 1                   | 6.695                 | 27.373          | 195.295       | 49.72              | 1.12           | 0.22              |
| 2                   | 7.163                 | 27.686          | 183.440       | 50.28              | 1.10           | 0.24              |
| Total:              |                       | 55.060          | 378.735       | 100.00             |                |                   |

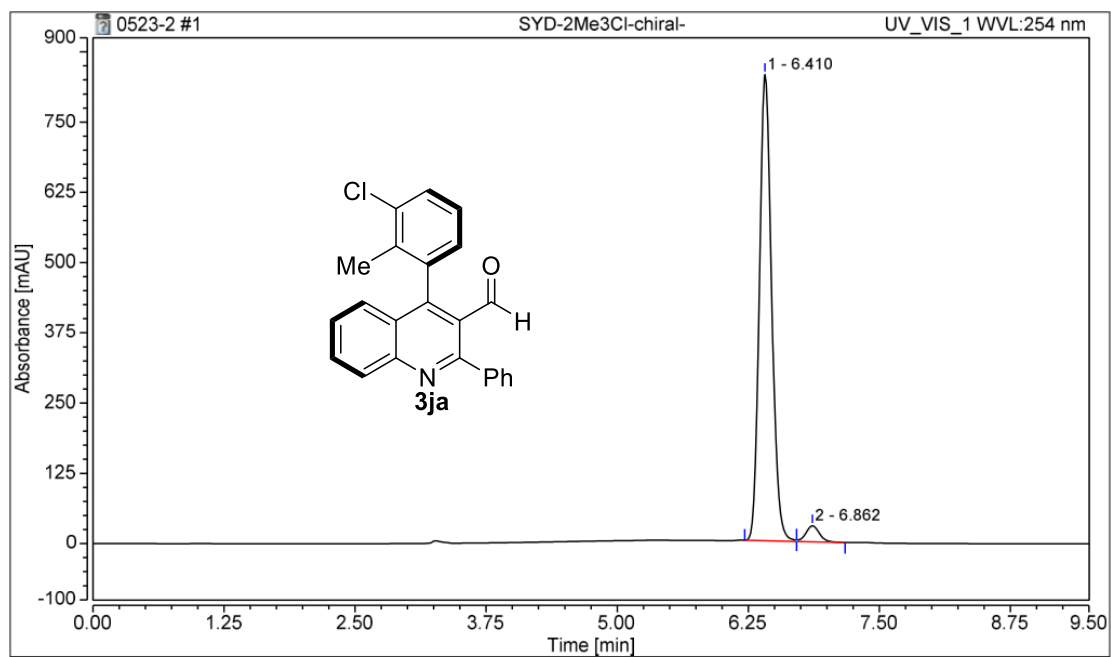

| Integration Results |                       |                 |               |                    |                |                   |
|---------------------|-----------------------|-----------------|---------------|--------------------|----------------|-------------------|
| No.                 | Retention Time<br>min | Area<br>mAU*min | Height<br>mAU | Relative Area<br>% | Asymmetry (EP) | Peak Width<br>min |
| 1                   | 6.410                 | 112.488         | 829.784       | 96.34              | 1.14           | 0.21              |
| 2                   | 6.862                 | 4.275           | 28.522        | 3.66               | n.a.           | 0.23              |
| Total:              |                       | 116.762         | 858.306       | 100.00             |                |                   |

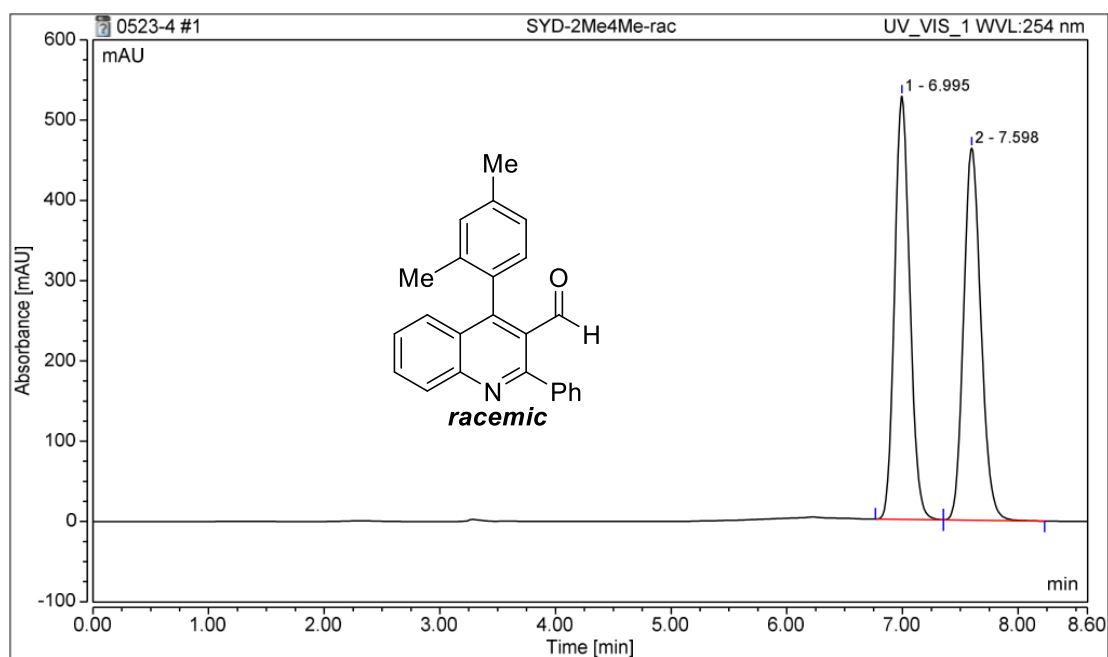

| Integration Results |                       |                 |                |                    |                |                   |
|---------------------|-----------------------|-----------------|----------------|--------------------|----------------|-------------------|
| No.                 | Retention Time<br>min | Area<br>mAU*min | Height<br>mAU  | Relative Area<br>% | Asymmetry (EP) | Peak Width<br>min |
| 1                   | 6.995                 | 80.494          | 527.402        | 49.94              | 1.12           | 0.24              |
| 2                   | 7.598                 | 80.672          | 463.611        | 50.06              | 1.15           | 0.27              |
| <b>Total:</b>       |                       | <b>161.166</b>  | <b>991.013</b> | <b>100.00</b>      |                |                   |

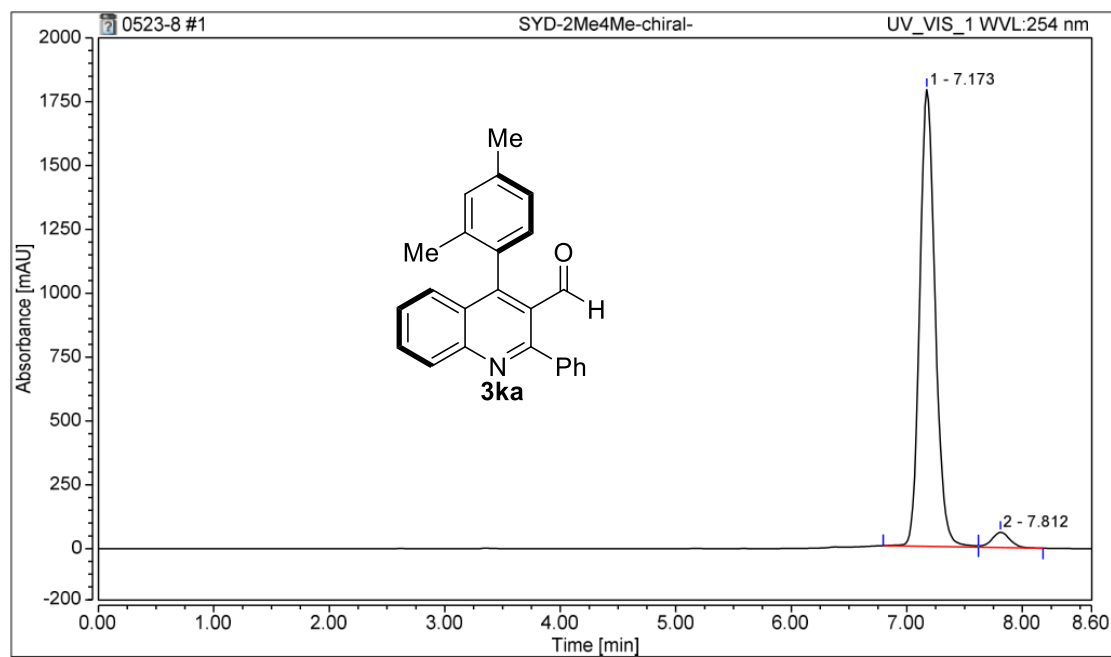

| Integration Results |                       |                 |                 |                    |                |                   |
|---------------------|-----------------------|-----------------|-----------------|--------------------|----------------|-------------------|
| No.                 | Retention Time<br>min | Area<br>mAU*min | Height<br>mAU   | Relative Area<br>% | Asymmetry (EP) | Peak Width<br>min |
| 1                   | 7.173                 | 277.257         | 1788.909        | 96.20              | 1.15           | 0.24              |
| 2                   | 7.812                 | 10.946          | 59.646          | 3.80               | n.a.           | 0.28              |
| <b>Total:</b>       |                       | <b>288.203</b>  | <b>1848.555</b> | <b>100.00</b>      |                |                   |

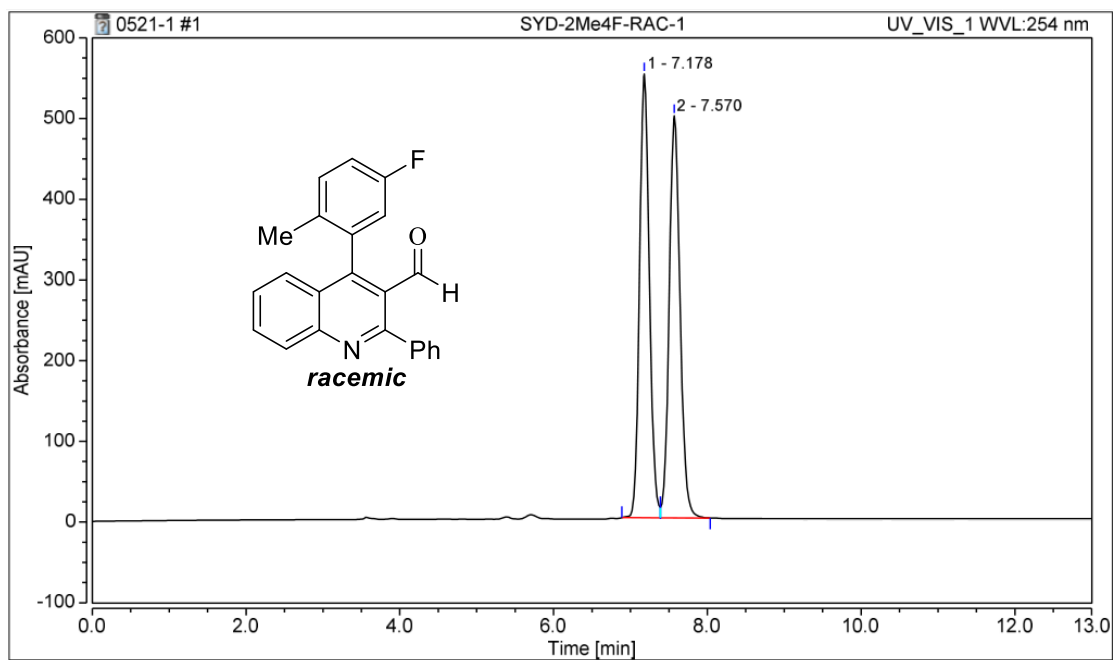

| Integration Results |                       |                 |               |                    |                |                   |
|---------------------|-----------------------|-----------------|---------------|--------------------|----------------|-------------------|
| No.                 | Retention Time<br>min | Area<br>mAU*min | Height<br>mAU | Relative Area<br>% | Asymmetry (EP) | Peak Width<br>min |
| 1                   | 7.178                 | 81.216          | 549.879       | 49.96              | 1.12           | 0.23              |
| 2                   | 7.570                 | 81.353          | 498.222       | 50.04              | 1.12           | 0.25              |
| Total:              |                       | 162.569         | 1048.101      | 100.00             |                |                   |

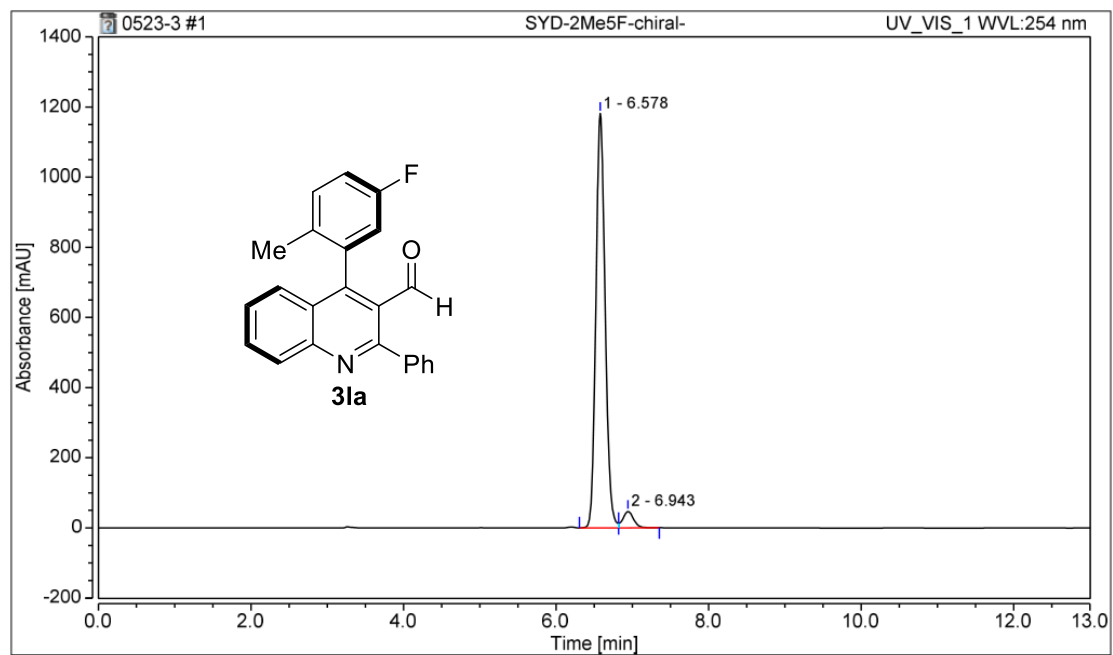

| Integration Results |                       |                 |               |                    |                |                   |
|---------------------|-----------------------|-----------------|---------------|--------------------|----------------|-------------------|
| No.                 | Retention Time<br>min | Area<br>mAU*min | Height<br>mAU | Relative Area<br>% | Asymmetry (EP) | Peak Width<br>min |
| 1                   | 6.578                 | 165.261         | 1181.485      | 95.61              | 1.14           | 0.22              |
| 2                   | 6.943                 | 7.594           | 46.693        | 4.39               | n.a.           | 0.26              |
| Total:              |                       | 172.854         | 1228.177      | 100.00             |                |                   |

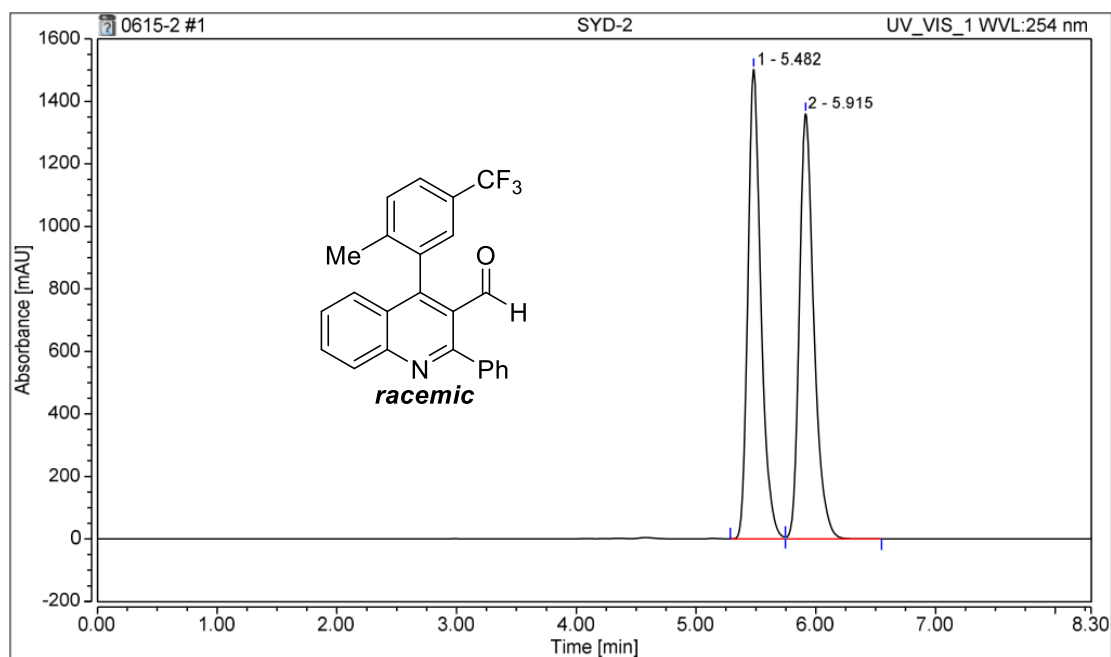

| Integration Results |                       |                 |               |                    |                |                   |
|---------------------|-----------------------|-----------------|---------------|--------------------|----------------|-------------------|
| No.                 | Retention Time<br>min | Area<br>mAU*min | Height<br>mAU | Relative Area<br>% | Asymmetry (EP) | Peak Width<br>min |
| 1                   | 5.482                 | 189.054         | 1501.708      | 49.72              | 1.29           | 0.19              |
| 2                   | 5.915                 | 191.167         | 1360.459      | 50.28              | 1.34           | 0.21              |
| Total:              |                       | 380.221         | 2862.168      | 100.00             |                |                   |

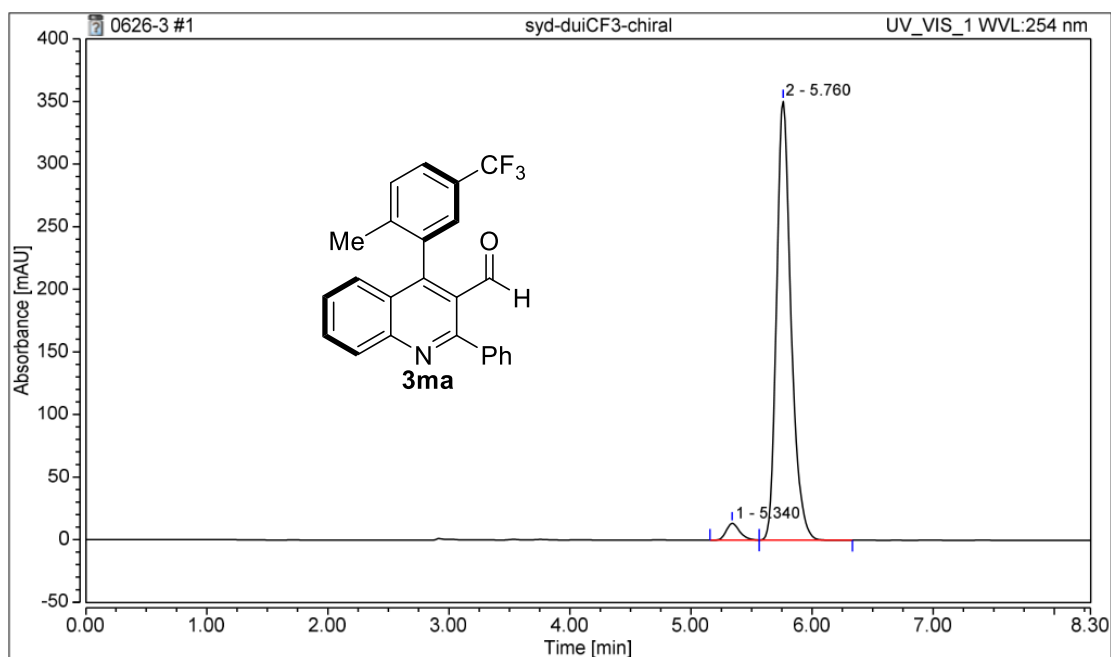

| Integration Results |                       |                 |               |                    |                |                   |
|---------------------|-----------------------|-----------------|---------------|--------------------|----------------|-------------------|
| No.                 | Retention Time<br>min | Area<br>mAU*min | Height<br>mAU | Relative Area<br>% | Asymmetry (EP) | Peak Width<br>min |
| 1                   | 5.340                 | 1.749           | 13.511        | 3.47               | 1.26           | 0.20              |
| 2                   | 5.760                 | 48.669          | 351.030       | 96.53              | 1.27           | 0.21              |
| Total:              |                       | 50.418          | 364.540       | 100.00             |                |                   |

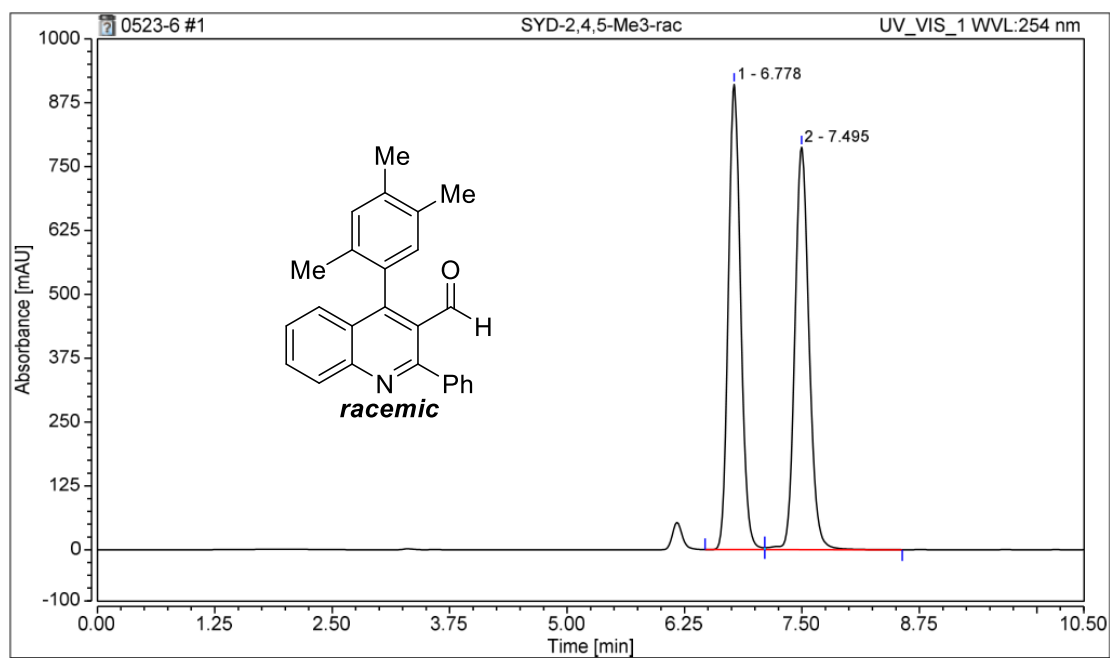

| Integration Results |                       |                 |               |                    |                |                   |
|---------------------|-----------------------|-----------------|---------------|--------------------|----------------|-------------------|
| No.                 | Retention Time<br>min | Area<br>mAU*min | Height<br>mAU | Relative Area<br>% | Asymmetry (EP) | Peak Width<br>min |
| 1                   | 6.778                 | 137.114         | 910.984       | 49.67              | 1.12           | 0.24              |
| 2                   | 7.495                 | 138.936         | 788.099       | 50.33              | 1.14           | 0.27              |
| Total:              |                       | 276.050         | 1699.083      | 100.00             |                |                   |

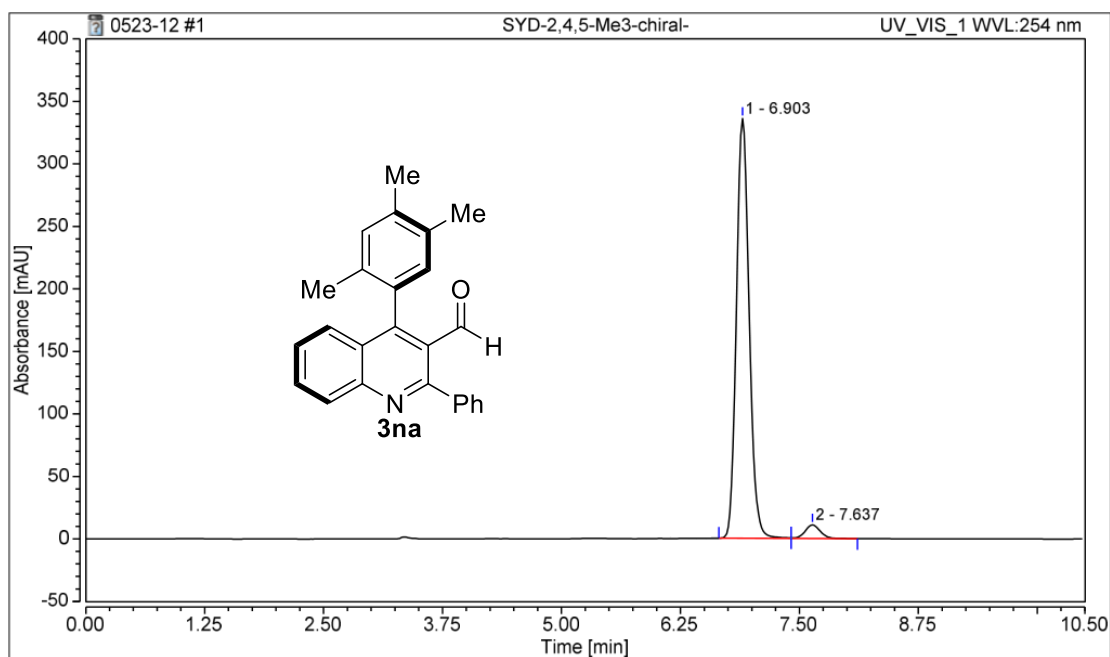

| Integration Results |                       |                 |               |                    |                |                   |
|---------------------|-----------------------|-----------------|---------------|--------------------|----------------|-------------------|
| No.                 | Retention Time<br>min | Area<br>mAU*min | Height<br>mAU | Relative Area<br>% | Asymmetry (EP) | Peak Width<br>min |
| 1                   | 6.903                 | 51.980          | 335.832       | 96.31              | 1.12           | 0.24              |
| 2                   | 7.637                 | 1.993           | 10.846        | 3.69               | 1.07           | 0.28              |
| Total:              |                       | 53.973          | 346.678       | 100.00             |                |                   |

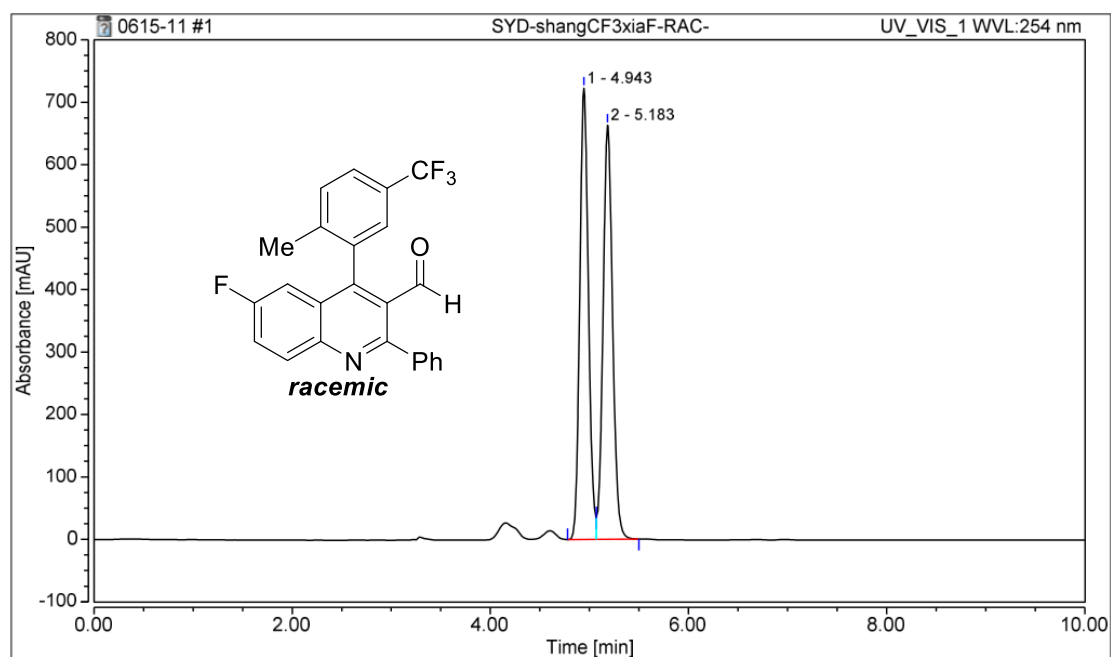

| Integration Results |                       |                 |                 |                    |                |                   |
|---------------------|-----------------------|-----------------|-----------------|--------------------|----------------|-------------------|
| No.                 | Retention Time<br>min | Area<br>mAU*min | Height<br>mAU   | Relative Area<br>% | Asymmetry (EP) | Peak Width<br>min |
| 1                   | 4.943                 | 72.834          | 722.825         | 49.65              | 1.16           | 0.16              |
| 2                   | 5.183                 | 73.849          | 663.222         | 50.35              | n.a.           | 0.17              |
| <b>Total:</b>       |                       | <b>146.683</b>  | <b>1386.048</b> | <b>100.00</b>      |                |                   |

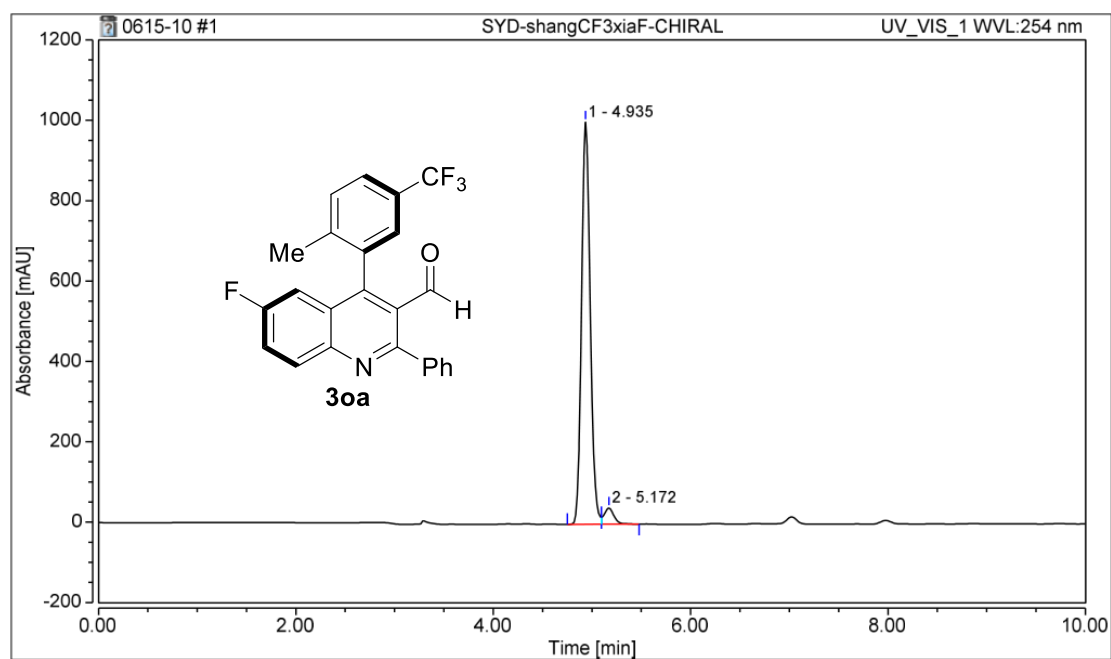

| Integration Results |                       |                 |                 |                    |                |                   |
|---------------------|-----------------------|-----------------|-----------------|--------------------|----------------|-------------------|
| No.                 | Retention Time<br>min | Area<br>mAU*min | Height<br>mAU   | Relative Area<br>% | Asymmetry (EP) | Peak Width<br>min |
| 1                   | 4.935                 | 101.267         | 1001.232        | 95.59              | 1.15           | 0.16              |
| 2                   | 5.172                 | 4.667           | 40.222          | 4.41               | n.a.           | 0.19              |
| <b>Total:</b>       |                       | <b>105.934</b>  | <b>1041.454</b> | <b>100.00</b>      |                |                   |

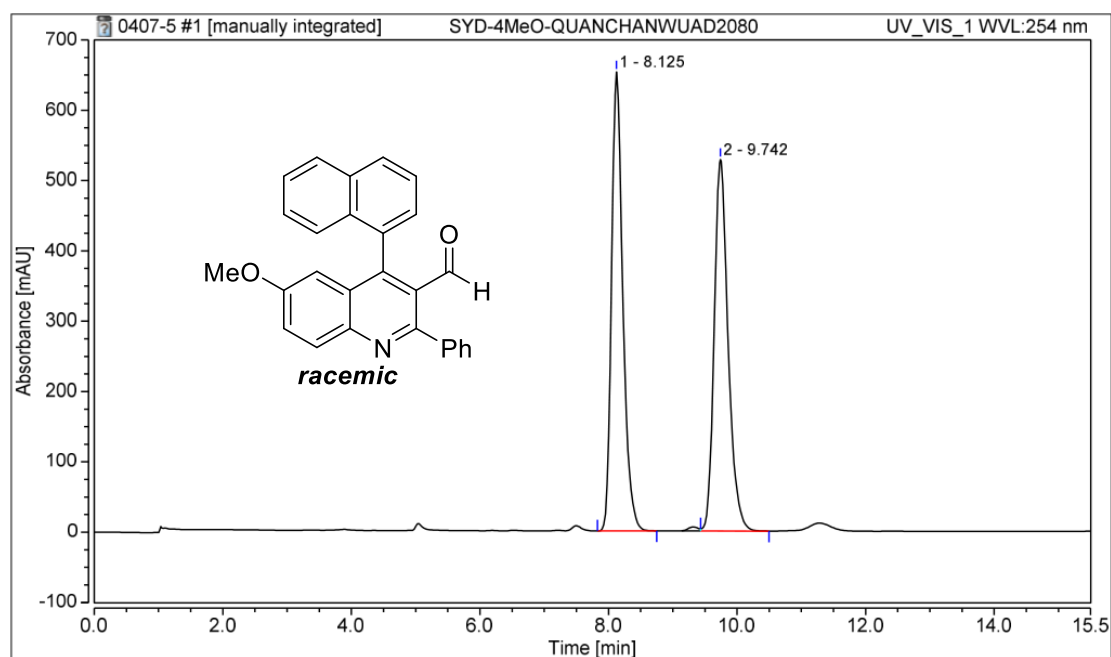

| Integration Results |                       |                 |               |                    |                |                   |
|---------------------|-----------------------|-----------------|---------------|--------------------|----------------|-------------------|
| No.                 | Retention Time<br>min | Area<br>mAU*min | Height<br>mAU | Relative Area<br>% | Asymmetry (EP) | Peak Width<br>min |
| 1                   | 8.125                 | 132.630         | 652.678       | 50.06              | 1.30           | 0.30              |
| 2                   | 9.742                 | 132.325         | 528.300       | 49.94              | 1.26           | 0.42              |
| Total:              |                       | 264.955         | 1180.978      | 100.00             |                |                   |

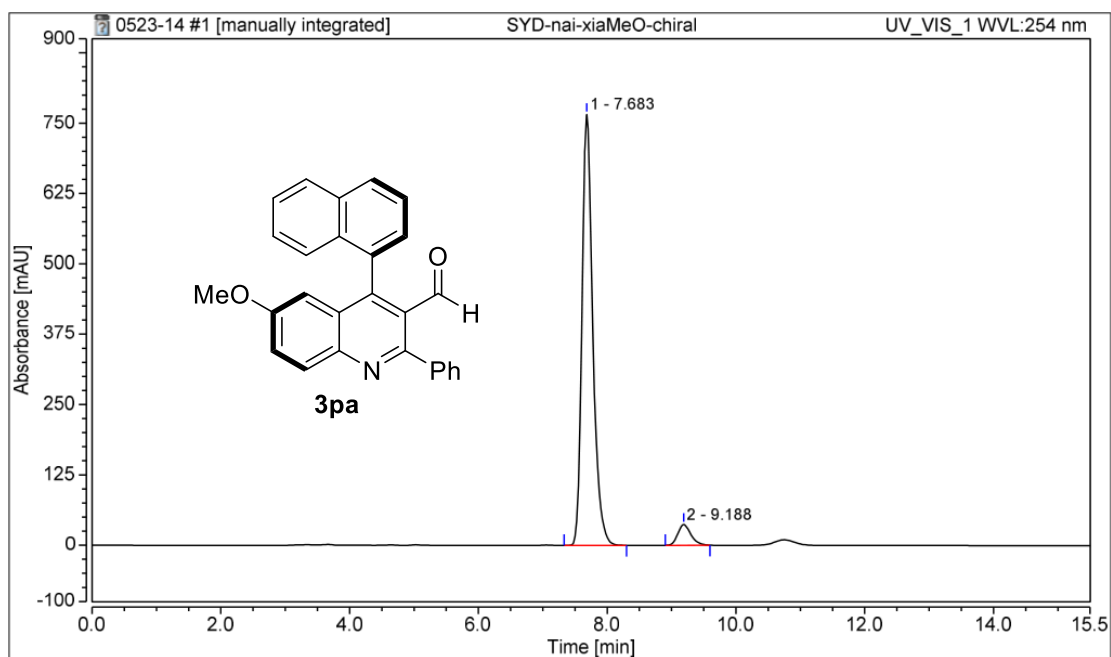

| Integration Results |                       |                 |               |                    |                |                   |
|---------------------|-----------------------|-----------------|---------------|--------------------|----------------|-------------------|
| No.                 | Retention Time<br>min | Area<br>mAU*min | Height<br>mAU | Relative Area<br>% | Asymmetry (EP) | Peak Width<br>min |
| 1                   | 7.683                 | 148.821         | 766.027       | 94.47              | 1.30           | 0.30              |
| 2                   | 9.188                 | 8.710           | 37.062        | 5.53               | 1.24           | 0.36              |
| Total:              |                       | 157.531         | 803.090       | 100.00             |                |                   |



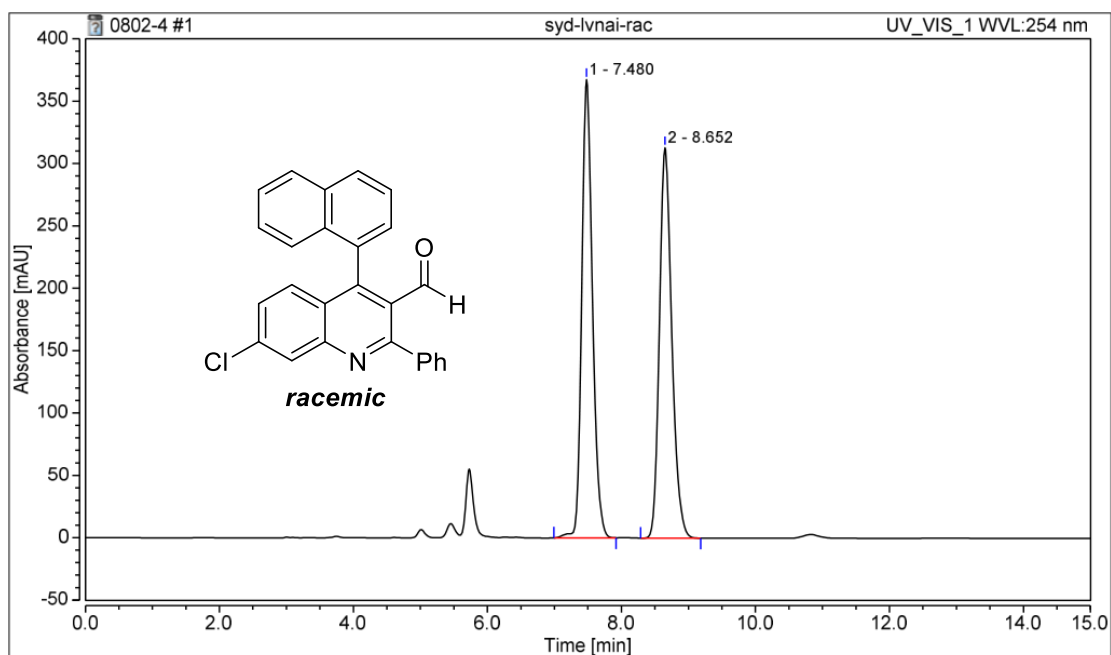

| Integration Results |                       |                 |                |                    |                |                   |
|---------------------|-----------------------|-----------------|----------------|--------------------|----------------|-------------------|
| No.                 | Retention Time<br>min | Area<br>mAU*min | Height<br>mAU  | Relative Area<br>% | Asymmetry (EP) | Peak Width<br>min |
| 1                   | 7.480                 | 68.227          | 367.444        | 50.35              | 1.22           | 0.29              |
| 2                   | 8.652                 | 67.287          | 312.987        | 49.65              | 1.21           | 0.33              |
| <b>Total:</b>       |                       | <b>135.514</b>  | <b>680.432</b> | <b>100.00</b>      |                |                   |

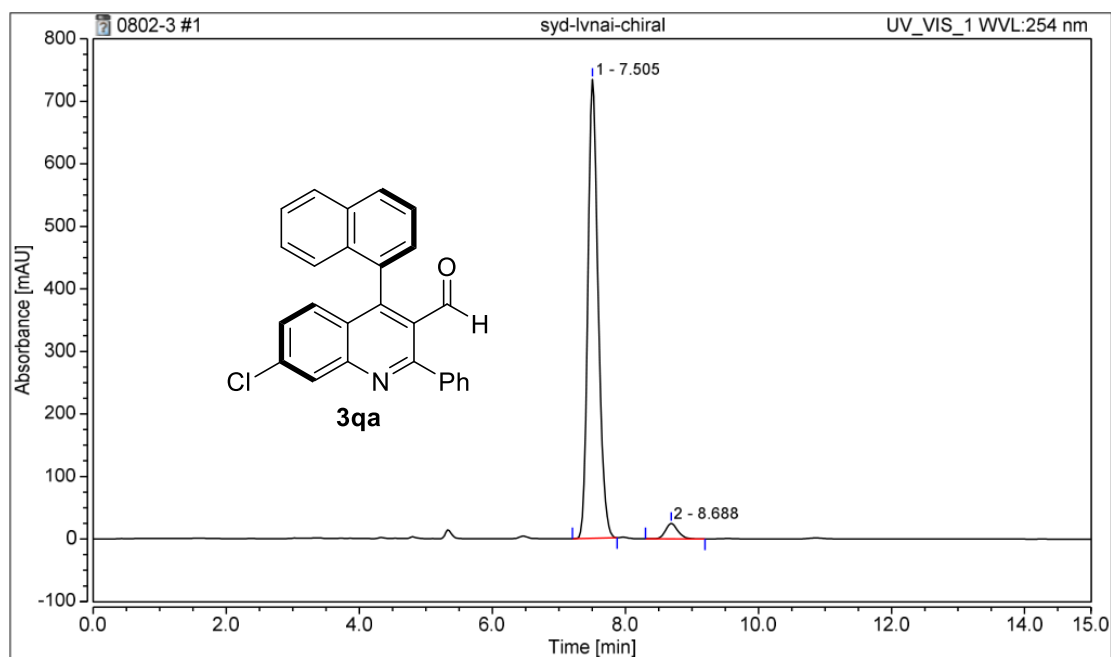

| Integration Results |                       |                 |                |                    |                |                   |
|---------------------|-----------------------|-----------------|----------------|--------------------|----------------|-------------------|
| No.                 | Retention Time<br>min | Area<br>mAU*min | Height<br>mAU  | Relative Area<br>% | Asymmetry (EP) | Peak Width<br>min |
| 1                   | 7.505                 | 131.693         | 733.982        | 96.11              | 1.22           | 0.28              |
| 2                   | 8.688                 | 5.336           | 24.638         | 3.89               | 1.16           | 0.34              |
| <b>Total:</b>       |                       | <b>137.029</b>  | <b>758.621</b> | <b>100.00</b>      |                |                   |

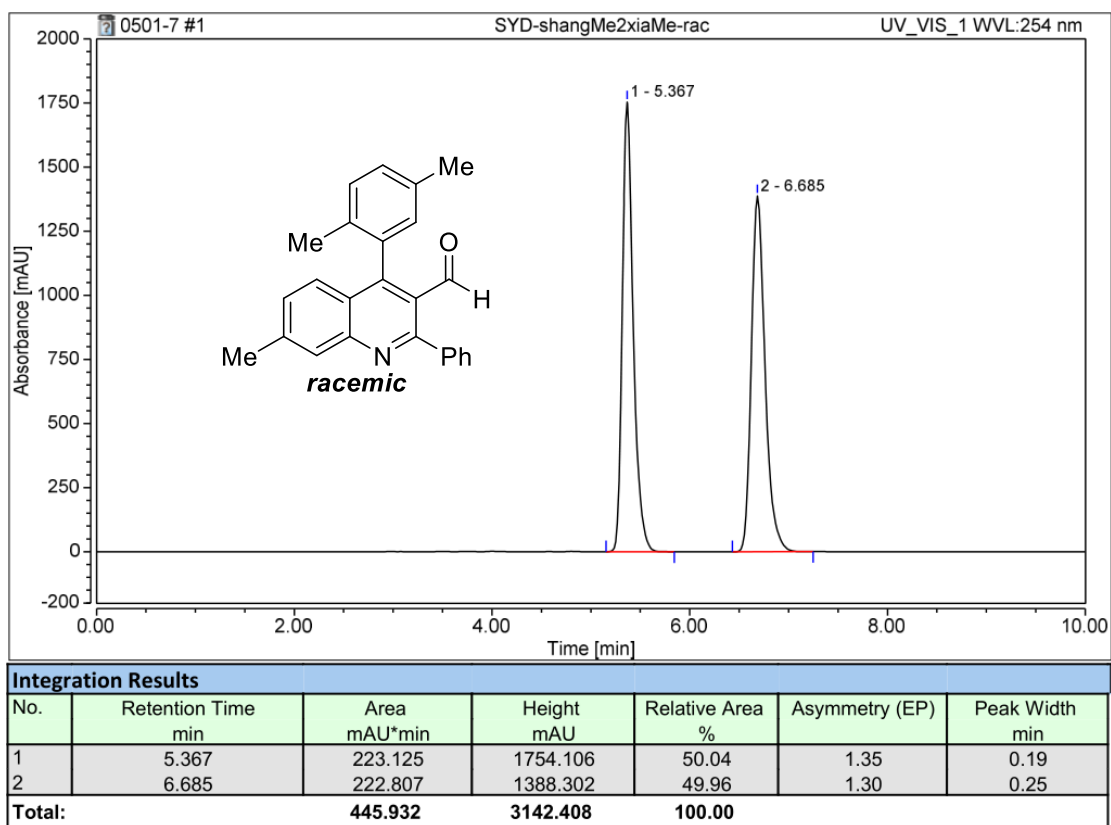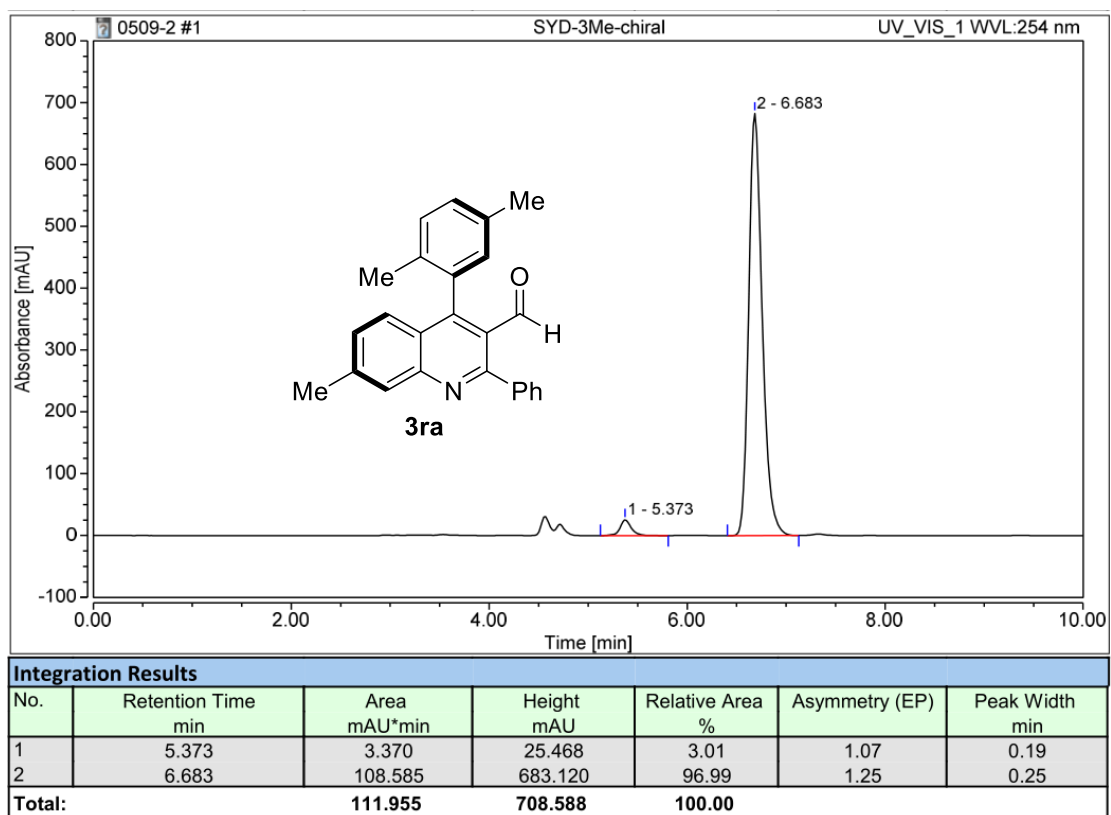

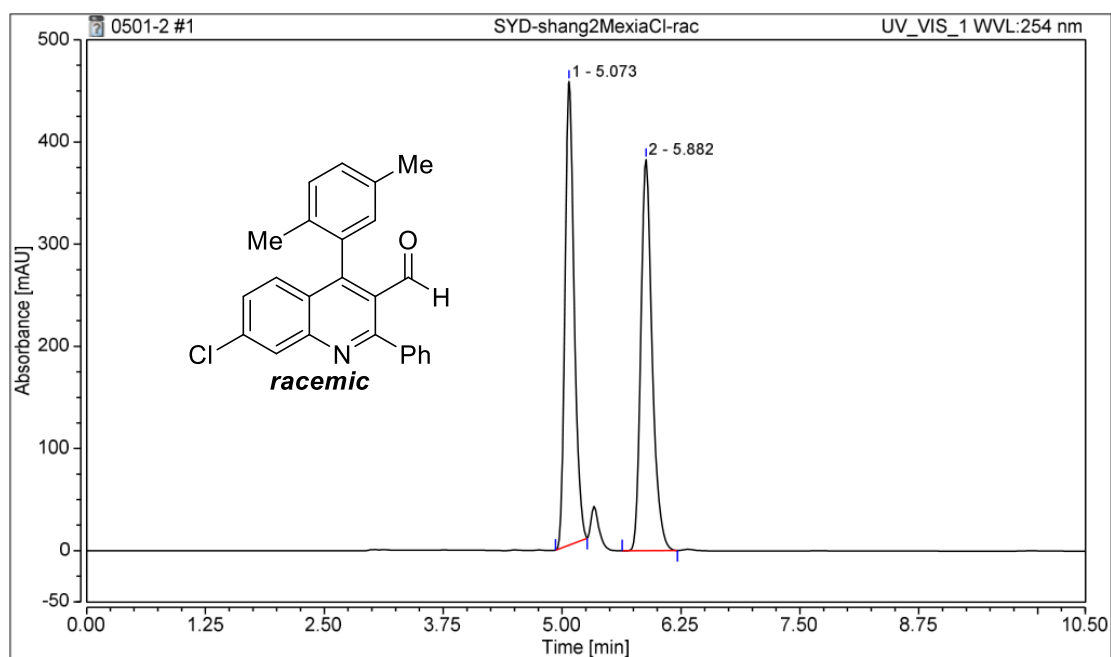

| Integration Results |                       |                 |                |                    |                |                   |
|---------------------|-----------------------|-----------------|----------------|--------------------|----------------|-------------------|
| No.                 | Retention Time<br>min | Area<br>mAU*min | Height<br>mAU  | Relative Area<br>% | Asymmetry (EP) | Peak Width<br>min |
| 1                   | 5.073                 | 50.625          | 453.944        | 48.93              | 1.25           | 0.17              |
| 2                   | 5.882                 | 52.839          | 382.929        | 51.07              | 1.28           | 0.21              |
| <b>Total:</b>       |                       | <b>103.464</b>  | <b>836.873</b> | <b>100.00</b>      |                |                   |

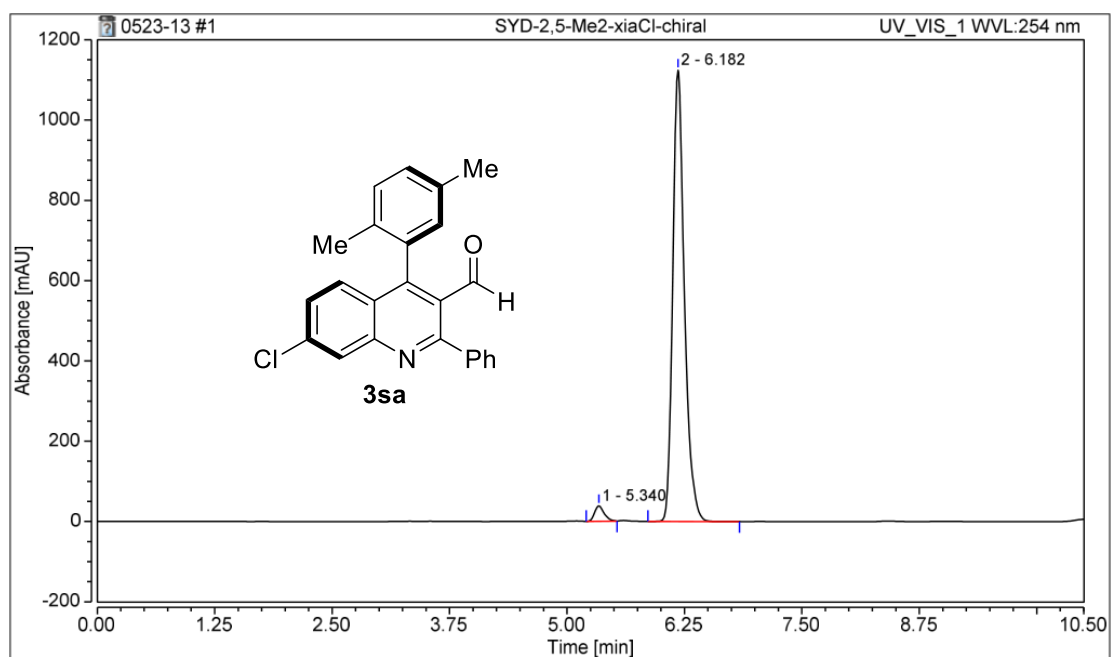

| Integration Results |                       |                 |                 |                    |                |                   |
|---------------------|-----------------------|-----------------|-----------------|--------------------|----------------|-------------------|
| No.                 | Retention Time<br>min | Area<br>mAU*min | Height<br>mAU   | Relative Area<br>% | Asymmetry (EP) | Peak Width<br>min |
| 1                   | 5.340                 | 4.508           | 38.838          | 2.70               | 1.26           | 0.18              |
| 2                   | 6.182                 | 162.226         | 1124.442        | 97.30              | 1.28           | 0.21              |
| <b>Total:</b>       |                       | <b>166.734</b>  | <b>1163.280</b> | <b>100.00</b>      |                |                   |

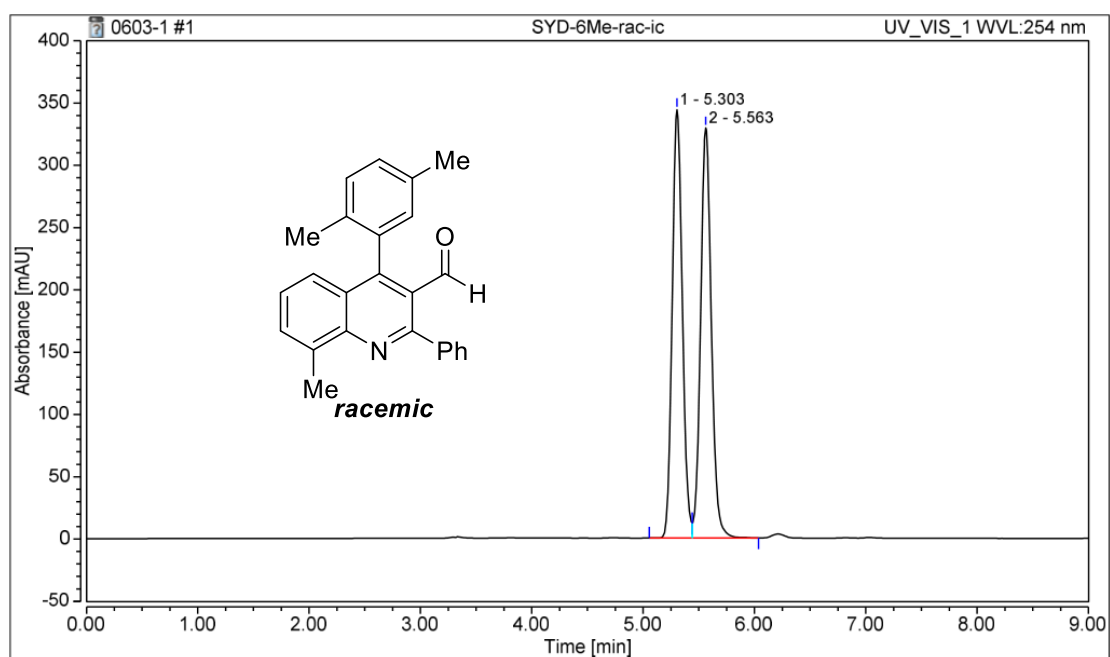

| Integration Results |                       |                 |               |                    |                |                   |
|---------------------|-----------------------|-----------------|---------------|--------------------|----------------|-------------------|
| No.                 | Retention Time<br>min | Area<br>mAU*min | Height<br>mAU | Relative Area<br>% | Asymmetry (EP) | Peak Width<br>min |
| 1                   | 5.303                 | 36.138          | 344.044       | 49.45              | 1.14           | 0.16              |
| 2                   | 5.563                 | 36.948          | 329.389       | 50.55              | 1.08           | 0.17              |
| Total:              |                       | 73.086          | 673.433       | 100.00             |                |                   |

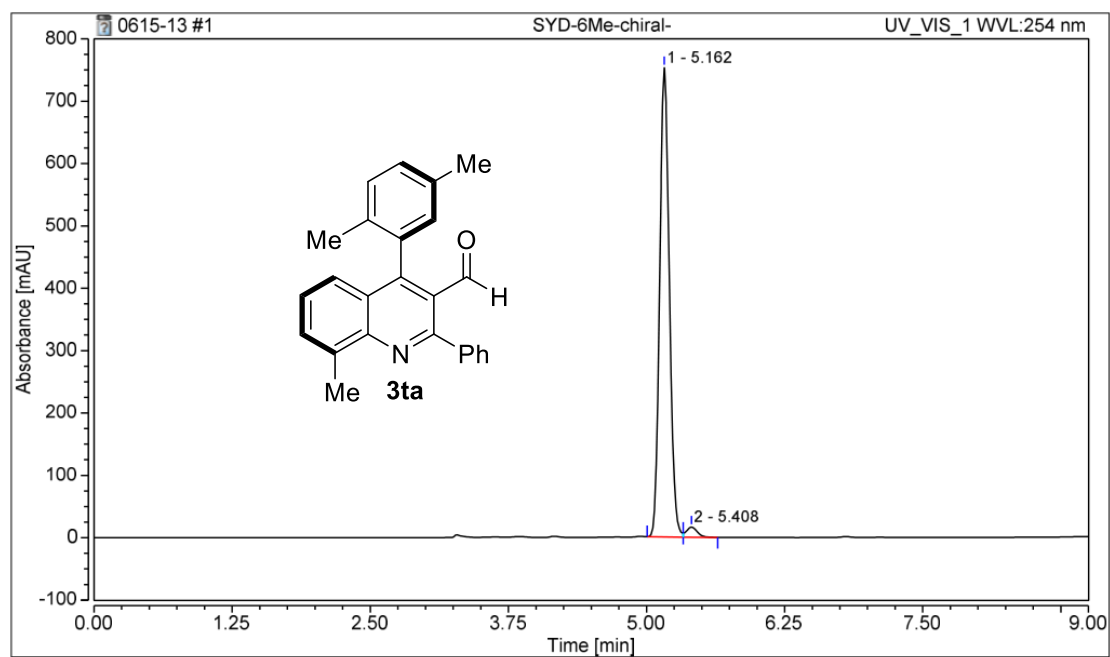

| Integration Results |                       |                 |               |                    |                |                   |
|---------------------|-----------------------|-----------------|---------------|--------------------|----------------|-------------------|
| No.                 | Retention Time<br>min | Area<br>mAU*min | Height<br>mAU | Relative Area<br>% | Asymmetry (EP) | Peak Width<br>min |
| 1                   | 5.162                 | 75.854          | 752.432       | 97.64              | 1.10           | 0.16              |
| 2                   | 5.408                 | 1.831           | 16.223        | 2.36               | n.a.           | 0.19              |
| Total:              |                       | 77.685          | 768.655       | 100.00             |                |                   |

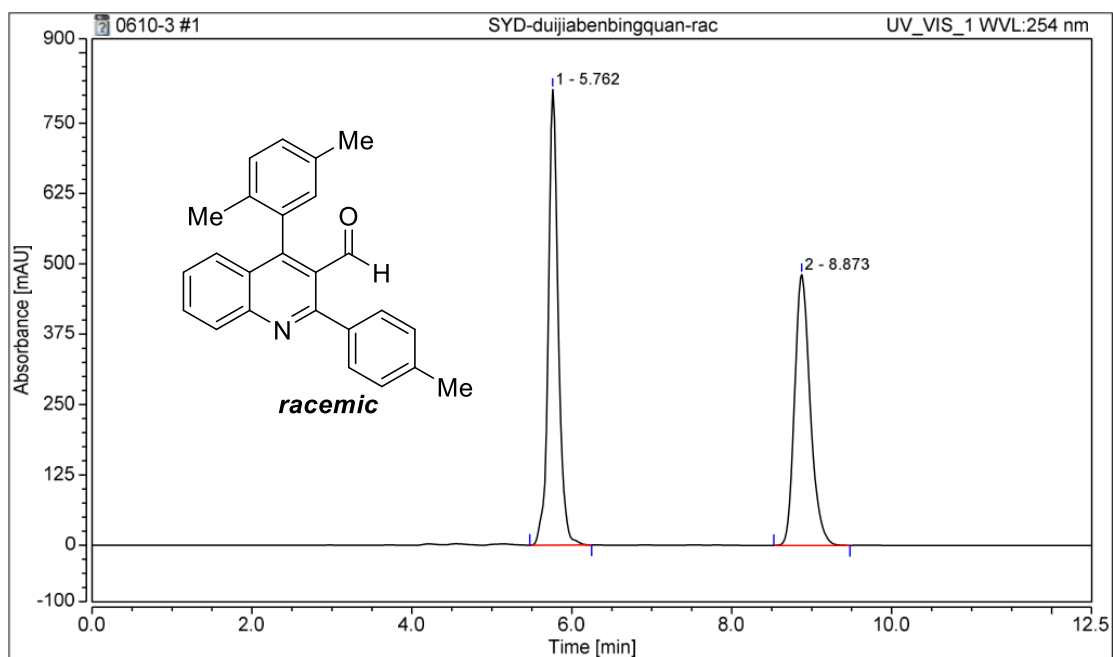

| Integration Results |                       |                 |               |                    |                |                   |
|---------------------|-----------------------|-----------------|---------------|--------------------|----------------|-------------------|
| No.                 | Retention Time<br>min | Area<br>mAU*min | Height<br>mAU | Relative Area<br>% | Asymmetry (EP) | Peak Width<br>min |
| 1                   | 5.762                 | 116.320         | 809.828       | 51.67              | 1.06           | 0.21              |
| 2                   | 8.873                 | 108.821         | 481.148       | 48.33              | 1.25           | 0.35              |
| Total:              |                       | 225.142         | 1290.976      | 100.00             |                |                   |

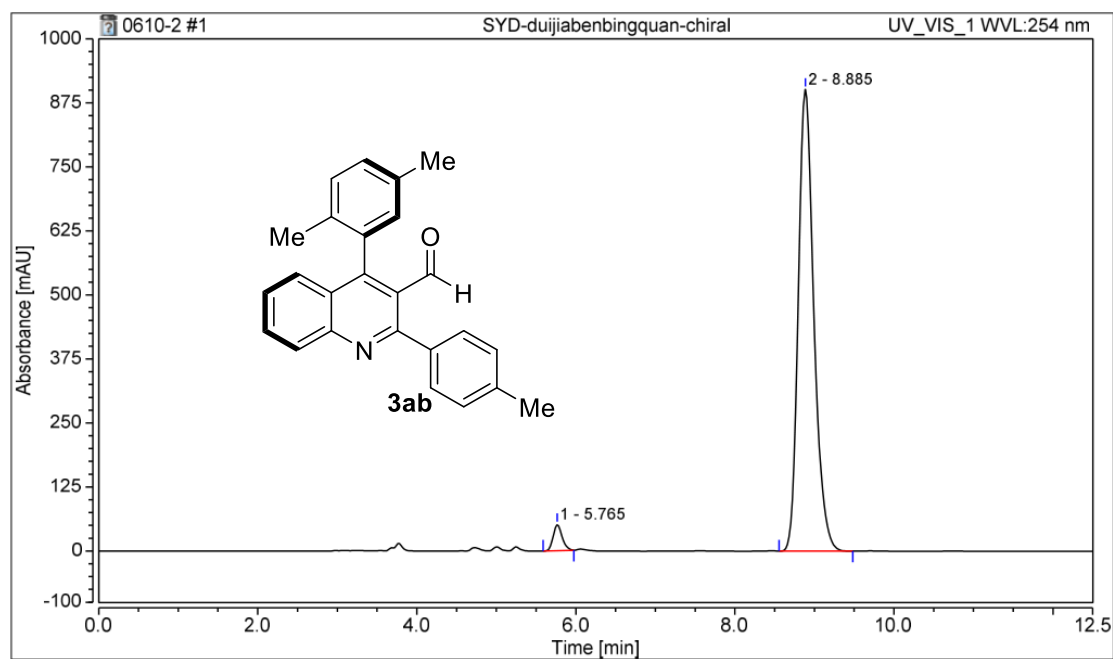

| Integration Results |                       |                 |               |                    |                |                   |
|---------------------|-----------------------|-----------------|---------------|--------------------|----------------|-------------------|
| No.                 | Retention Time<br>min | Area<br>mAU*min | Height<br>mAU | Relative Area<br>% | Asymmetry (EP) | Peak Width<br>min |
| 1                   | 5.765                 | 6.609           | 50.920        | 3.13               | 1.21           | 0.20              |
| 2                   | 8.885                 | 204.275         | 901.775       | 96.87              | 1.25           | 0.35              |
| Total:              |                       | 210.883         | 952.695       | 100.00             |                |                   |

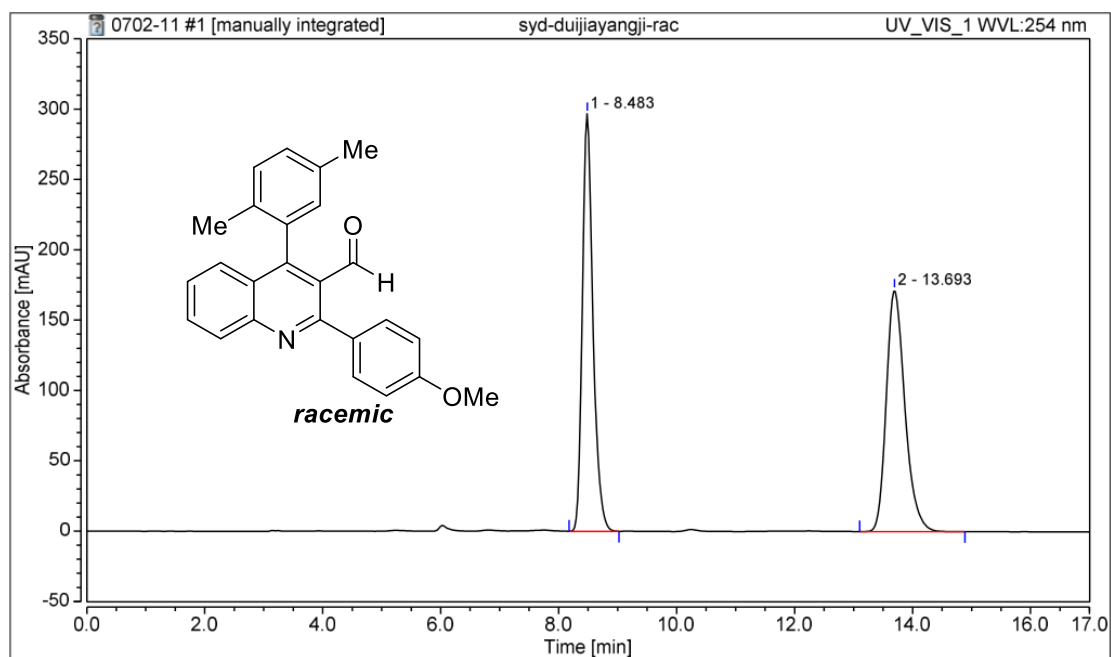

| Integration Results |                       |                 |                |                    |                |                   |
|---------------------|-----------------------|-----------------|----------------|--------------------|----------------|-------------------|
| No.                 | Retention Time<br>min | Area<br>mAU*min | Height<br>mAU  | Relative Area<br>% | Asymmetry (EP) | Peak Width<br>min |
| 1                   | 8.483                 | 61.947          | 296.855        | 49.73              | 1.27           | 0.32              |
| 2                   | 13.693                | 62.620          | 171.718        | 50.27              | 1.27           | 0.57              |
| <b>Total:</b>       |                       | <b>124.566</b>  | <b>468.572</b> | <b>100.00</b>      |                |                   |

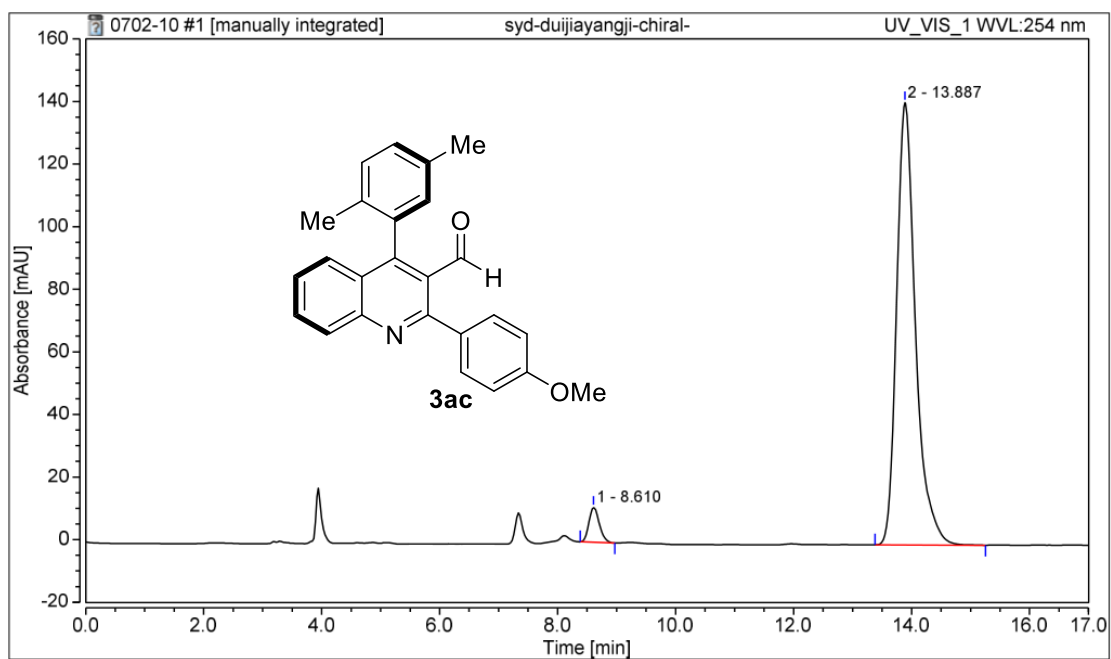

| Integration Results |                       |                 |                |                    |                |                   |
|---------------------|-----------------------|-----------------|----------------|--------------------|----------------|-------------------|
| No.                 | Retention Time<br>min | Area<br>mAU*min | Height<br>mAU  | Relative Area<br>% | Asymmetry (EP) | Peak Width<br>min |
| 1                   | 8.610                 | 2.263           | 11.141         | 4.15               | 1.21           | 0.31              |
| 2                   | 13.887                | 52.318          | 141.336        | 95.85              | 1.37           | 0.54              |
| <b>Total:</b>       |                       | <b>54.581</b>   | <b>152.477</b> | <b>100.00</b>      |                |                   |

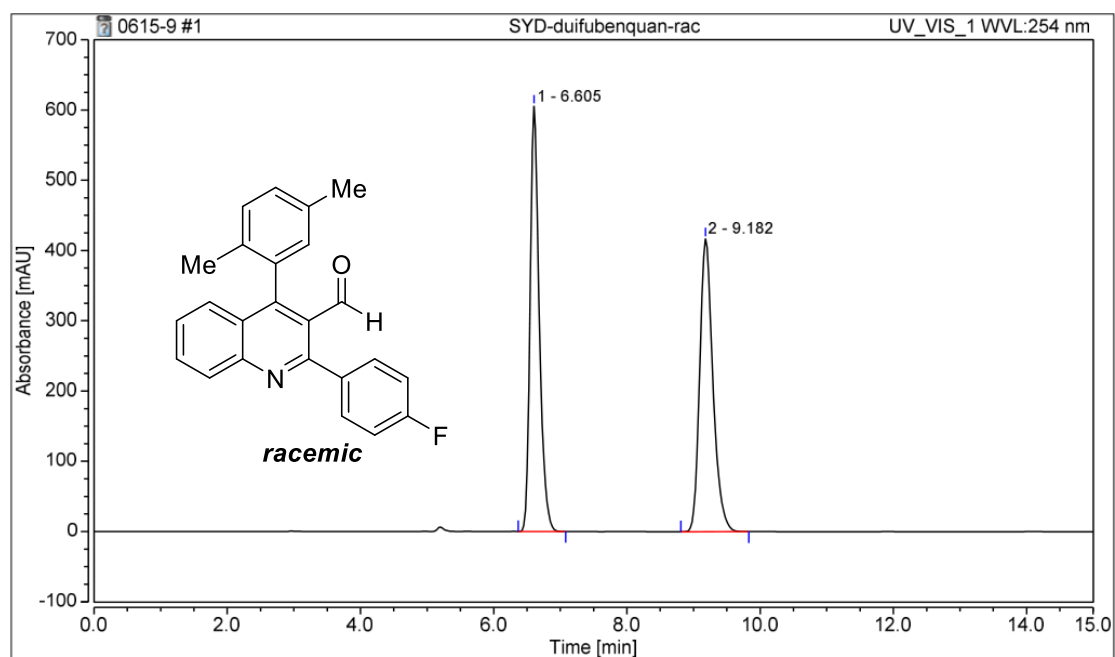

| Integration Results |                       |                 |               |                    |                |                   |
|---------------------|-----------------------|-----------------|---------------|--------------------|----------------|-------------------|
| No.                 | Retention Time<br>min | Area<br>mAU*min | Height<br>mAU | Relative Area<br>% | Asymmetry (EP) | Peak Width<br>min |
| 1                   | 6.605                 | 96.138          | 605.392       | 50.11              | 1.33           | 0.24              |
| 2                   | 9.182                 | 95.726          | 416.635       | 49.89              | 1.27           | 0.35              |
| Total:              |                       | 191.864         | 1022.027      | 100.00             |                |                   |

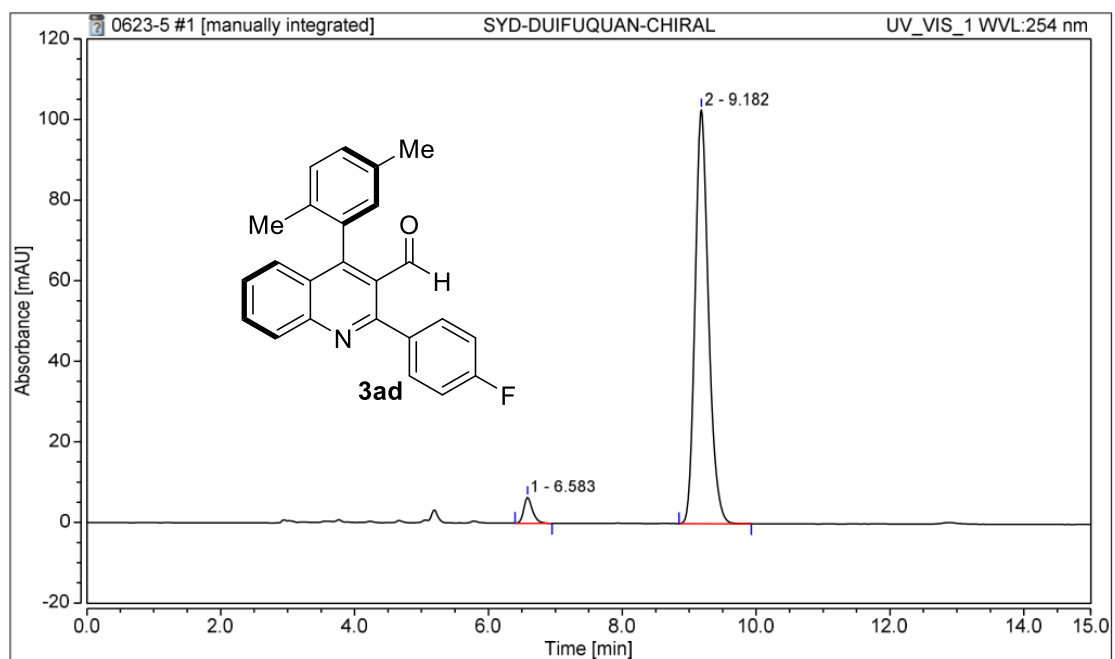

| Integration Results |                       |                 |               |                    |                |                   |
|---------------------|-----------------------|-----------------|---------------|--------------------|----------------|-------------------|
| No.                 | Retention Time<br>min | Area<br>mAU*min | Height<br>mAU | Relative Area<br>% | Asymmetry (EP) | Peak Width<br>min |
| 1                   | 6.583                 | 0.975           | 6.428         | 3.93               | 1.32           | 0.23              |
| 2                   | 9.182                 | 23.851          | 102.716       | 96.07              | 1.21           | 0.36              |
| Total:              |                       | 24.826          | 109.144       | 100.00             |                |                   |

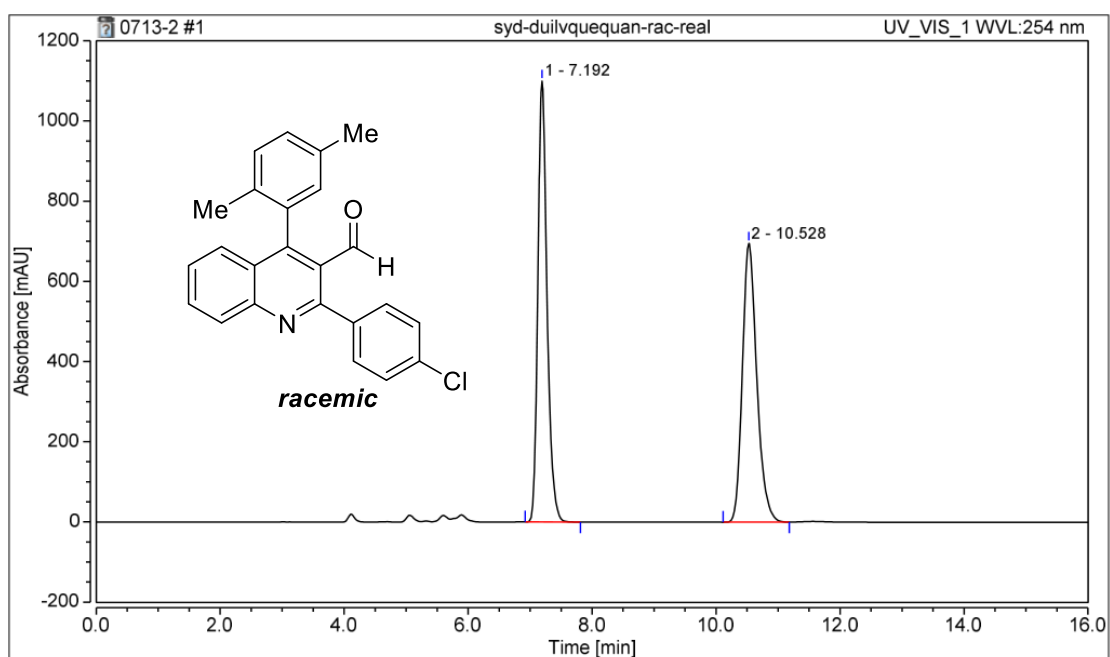

| Integration Results |                       |                 |                 |                    |                |                   |
|---------------------|-----------------------|-----------------|-----------------|--------------------|----------------|-------------------|
| No.                 | Retention Time<br>min | Area<br>mAU*min | Height<br>mAU   | Relative Area<br>% | Asymmetry (EP) | Peak Width<br>min |
| 1                   | 7.192                 | 187.916         | 1099.904        | 50.08              | 1.26           | 0.26              |
| 2                   | 10.528                | 187.329         | 695.796         | 49.92              | 1.25           | 0.41              |
| <b>Total:</b>       |                       | <b>375.246</b>  | <b>1795.700</b> | <b>100.00</b>      |                |                   |

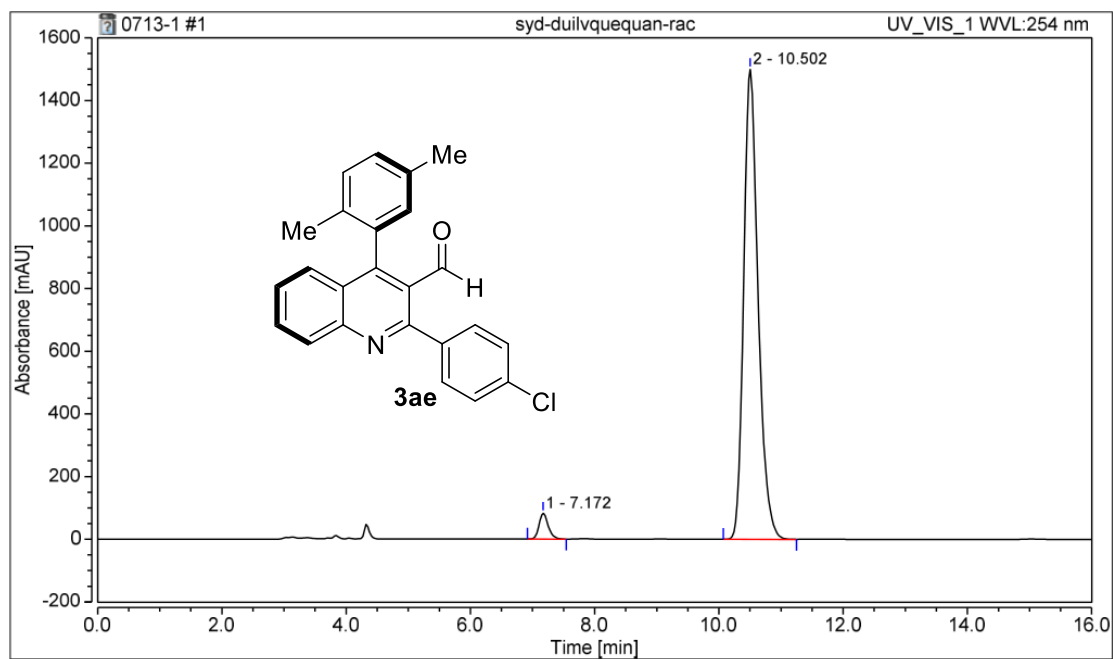

| Integration Results |                       |                 |                 |                    |                |                   |
|---------------------|-----------------------|-----------------|-----------------|--------------------|----------------|-------------------|
| No.                 | Retention Time<br>min | Area<br>mAU*min | Height<br>mAU   | Relative Area<br>% | Asymmetry (EP) | Peak Width<br>min |
| 1                   | 7.172                 | 14.122          | 83.064          | 3.38               | 1.24           | 0.26              |
| 2                   | 10.502                | 403.326         | 1499.526        | 96.62              | 1.27           | 0.42              |
| <b>Total:</b>       |                       | <b>417.449</b>  | <b>1582.590</b> | <b>100.00</b>      |                |                   |



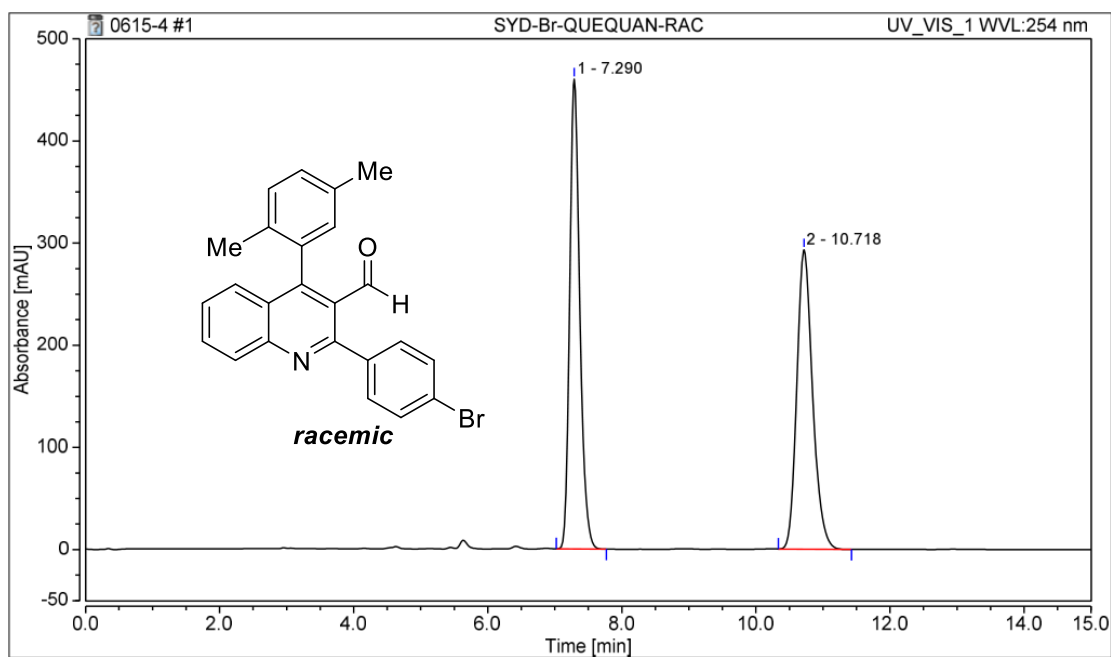

| Integration Results |                       |                 |                |                    |                |                   |
|---------------------|-----------------------|-----------------|----------------|--------------------|----------------|-------------------|
| No.                 | Retention Time<br>min | Area<br>mAU*min | Height<br>mAU  | Relative Area<br>% | Asymmetry (EP) | Peak Width<br>min |
| 1                   | 7.290                 | 80.229          | 459.932        | 50.08              | 1.24           | 0.27              |
| 2                   | 10.718                | 79.977          | 293.020        | 49.92              | 1.21           | 0.43              |
| <b>Total:</b>       |                       | <b>160.206</b>  | <b>752.952</b> | <b>100.00</b>      |                |                   |

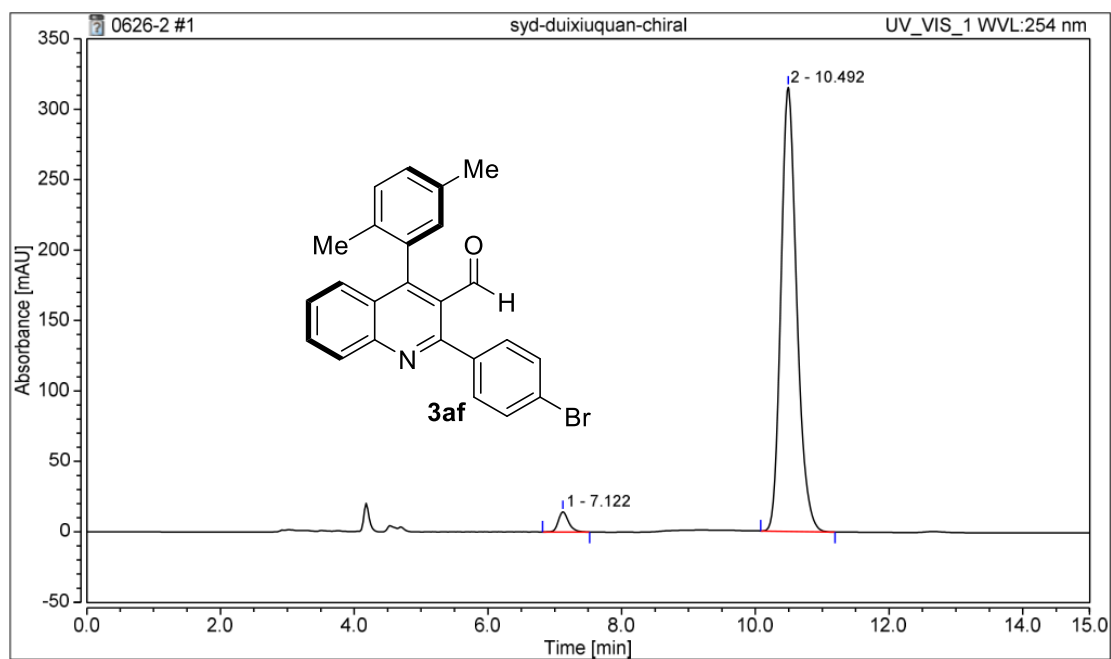

| Integration Results |                       |                 |                |                    |                |                   |
|---------------------|-----------------------|-----------------|----------------|--------------------|----------------|-------------------|
| No.                 | Retention Time<br>min | Area<br>mAU*min | Height<br>mAU  | Relative Area<br>% | Asymmetry (EP) | Peak Width<br>min |
| 1                   | 7.122                 | 2.571           | 14.415         | 2.88               | 1.26           | 0.27              |
| 2                   | 10.492                | 86.554          | 315.393        | 97.12              | 1.22           | 0.43              |
| <b>Total:</b>       |                       | <b>89.125</b>   | <b>329.808</b> | <b>100.00</b>      |                |                   |

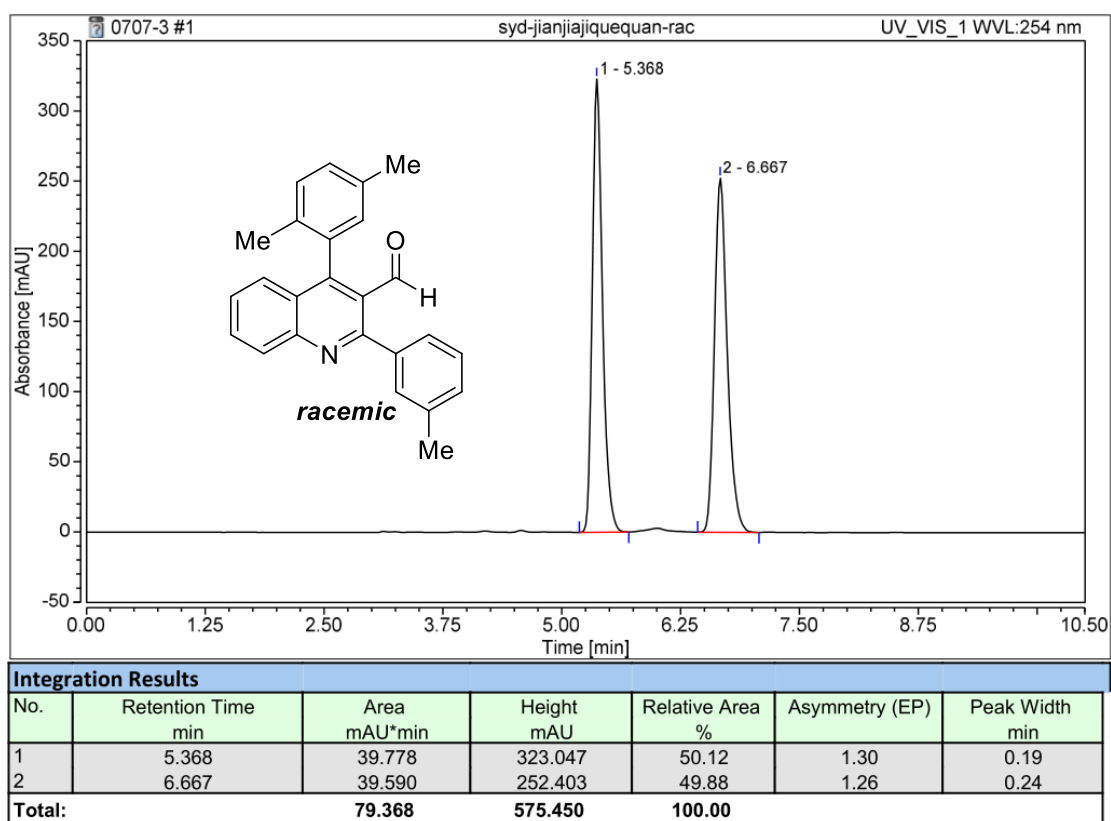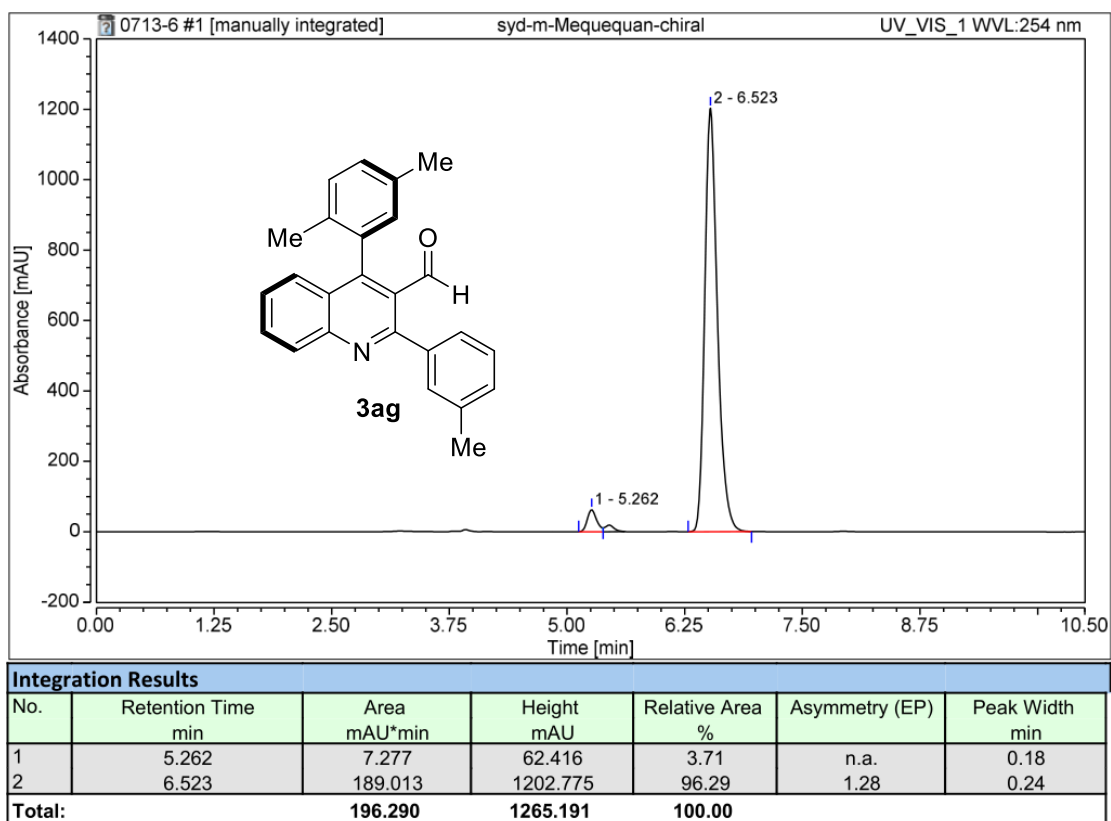

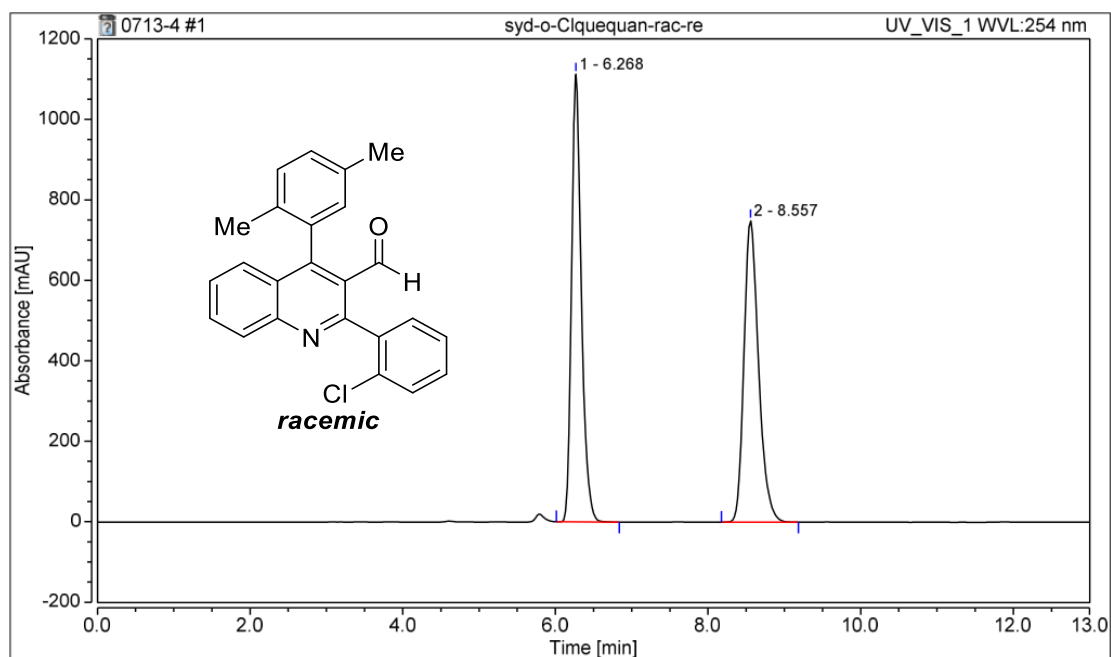

| Integration Results |                       |                 |                 |                    |                |                   |
|---------------------|-----------------------|-----------------|-----------------|--------------------|----------------|-------------------|
| No.                 | Retention Time<br>min | Area<br>mAU*min | Height<br>mAU   | Relative Area<br>% | Asymmetry (EP) | Peak Width<br>min |
| 1                   | 6.268                 | 165.352         | 1113.171        | 49.77              | 1.30           | 0.22              |
| 2                   | 8.557                 | 166.861         | 749.501         | 50.23              | 1.27           | 0.34              |
| <b>Total:</b>       |                       | <b>332.214</b>  | <b>1862.672</b> | <b>100.00</b>      |                |                   |

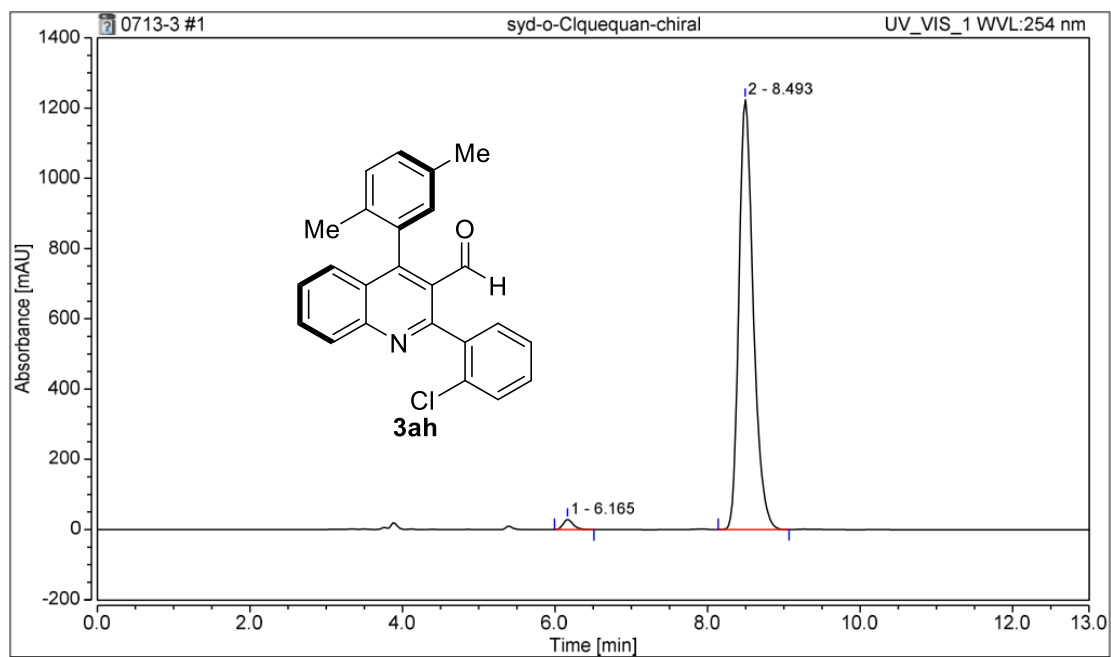

| Integration Results |                       |                 |                 |                    |                |                   |
|---------------------|-----------------------|-----------------|-----------------|--------------------|----------------|-------------------|
| No.                 | Retention Time<br>min | Area<br>mAU*min | Height<br>mAU   | Relative Area<br>% | Asymmetry (EP) | Peak Width<br>min |
| 1                   | 6.165                 | 4.511           | 28.919          | 1.65               | 1.29           | 0.24              |
| 2                   | 8.493                 | 268.682         | 1224.357        | 98.35              | 1.29           | 0.34              |
| <b>Total:</b>       |                       | <b>273.194</b>  | <b>1253.275</b> | <b>100.00</b>      |                |                   |

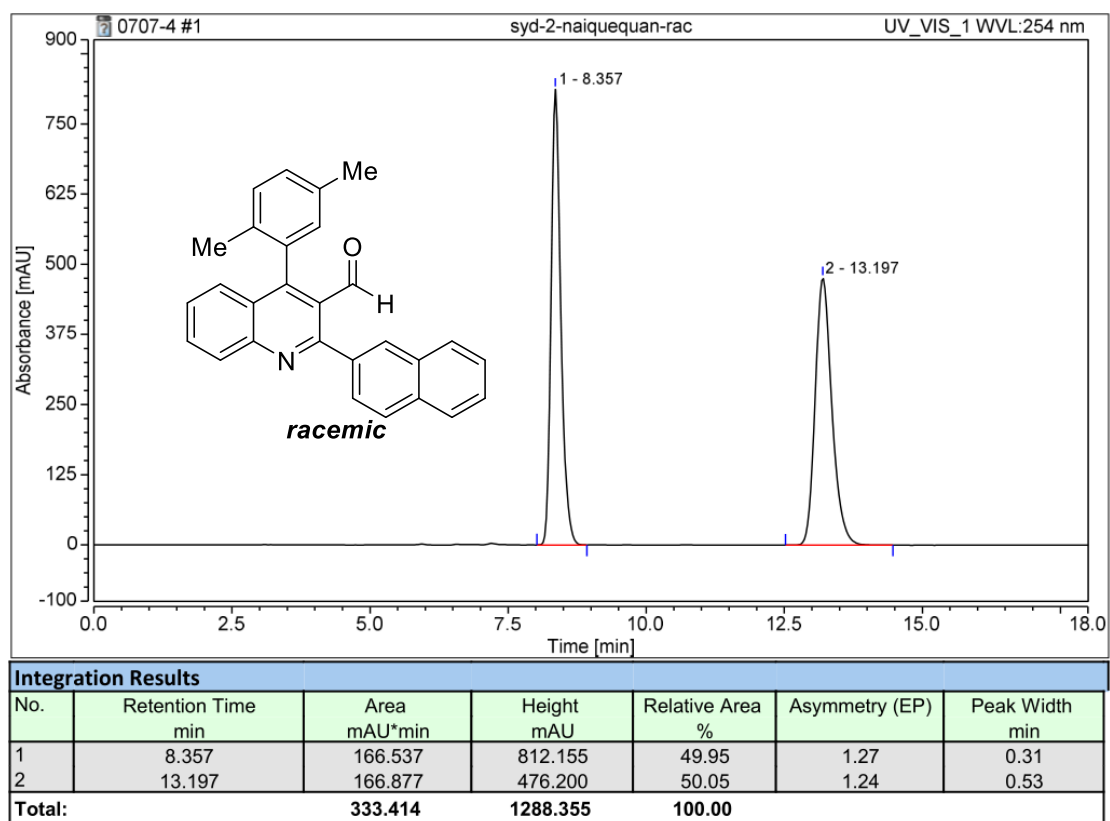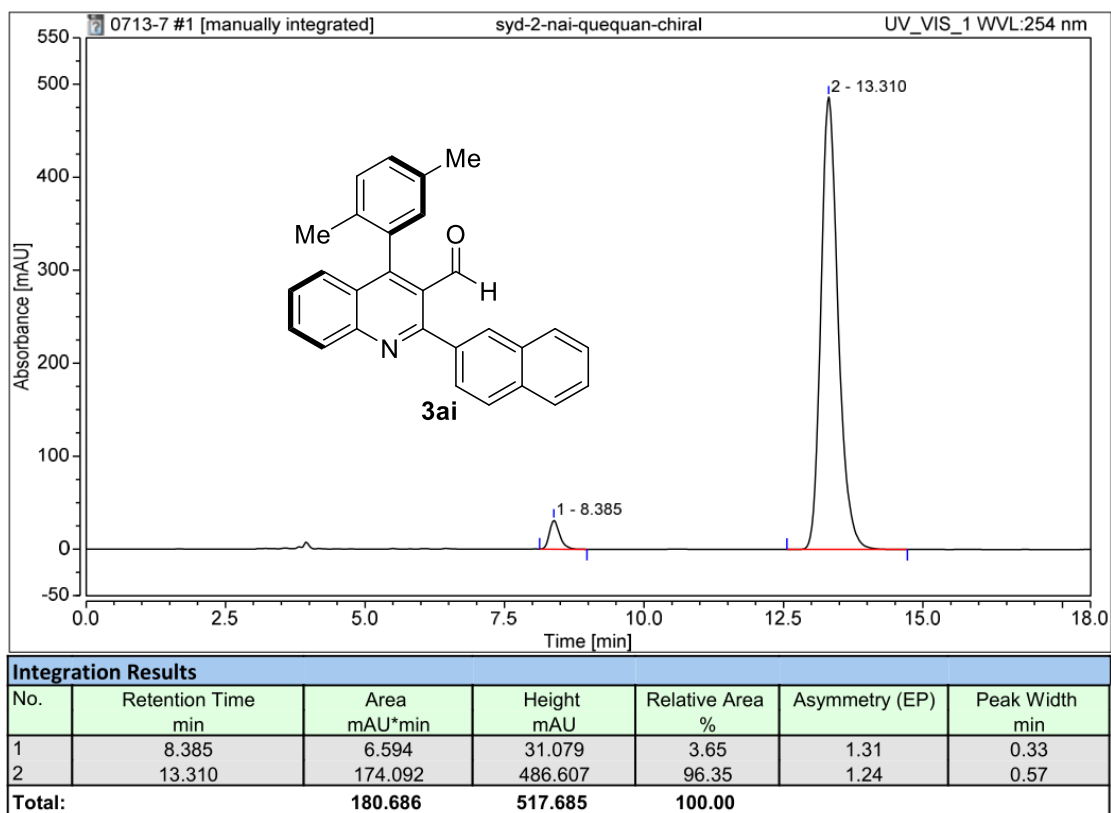

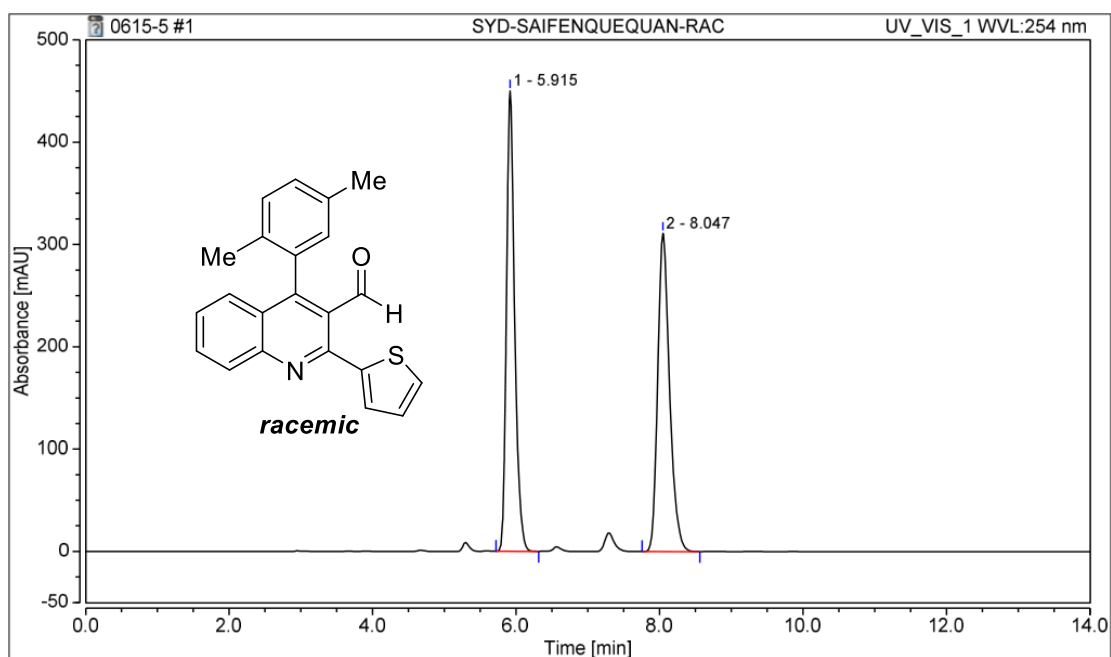

| Integration Results |                       |                 |               |                    |                |                   |
|---------------------|-----------------------|-----------------|---------------|--------------------|----------------|-------------------|
| No.                 | Retention Time<br>min | Area<br>mAU*min | Height<br>mAU | Relative Area<br>% | Asymmetry (EP) | Peak Width<br>min |
| 1                   | 5.915                 | 59.414          | 449.976       | 49.94              | 1.30           | 0.20              |
| 2                   | 8.047                 | 59.553          | 311.131       | 50.06              | 1.27           | 0.30              |
| Total:              |                       | 118.967         | 761.107       | 100.00             |                |                   |

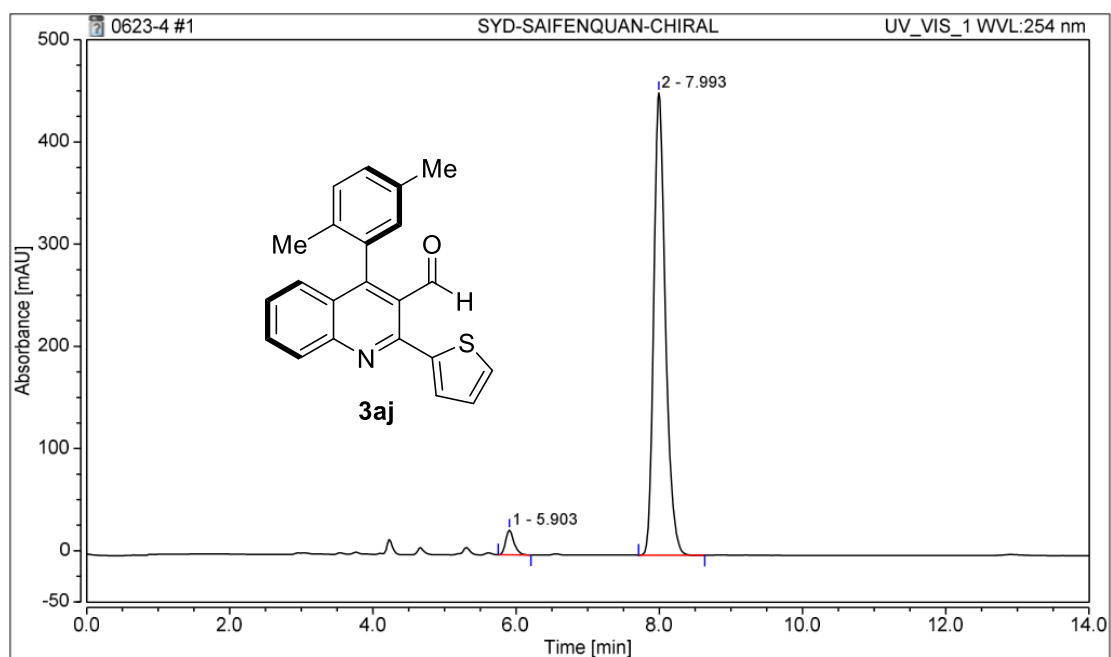

| Integration Results |                       |                 |               |                    |                |                   |
|---------------------|-----------------------|-----------------|---------------|--------------------|----------------|-------------------|
| No.                 | Retention Time<br>min | Area<br>mAU*min | Height<br>mAU | Relative Area<br>% | Asymmetry (EP) | Peak Width<br>min |
| 1                   | 5.903                 | 3.277           | 24.362        | 3.69               | 1.31           | 0.21              |
| 2                   | 7.993                 | 85.558          | 452.427       | 96.31              | 1.27           | 0.29              |
| Total:              |                       | 88.835          | 476.789       | 100.00             |                |                   |

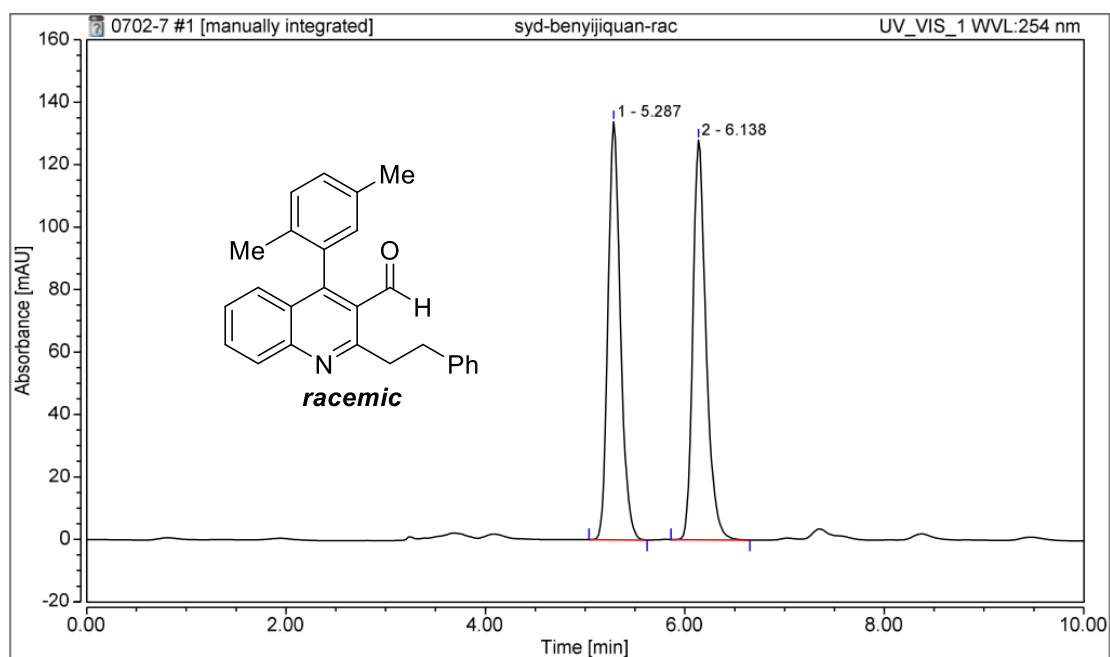

| Integration Results |                       |                 |               |                    |                |                   |
|---------------------|-----------------------|-----------------|---------------|--------------------|----------------|-------------------|
| No.                 | Retention Time<br>min | Area<br>mAU*min | Height<br>mAU | Relative Area<br>% | Asymmetry (EP) | Peak Width<br>min |
| 1                   | 5.287                 | 19.247          | 133.885       | 49.53              | 1.20           | 0.22              |
| 2                   | 6.138                 | 19.614          | 127.984       | 50.47              | 1.29           | 0.24              |
| Total:              |                       | 38.861          | 261.869       | 100.00             |                |                   |

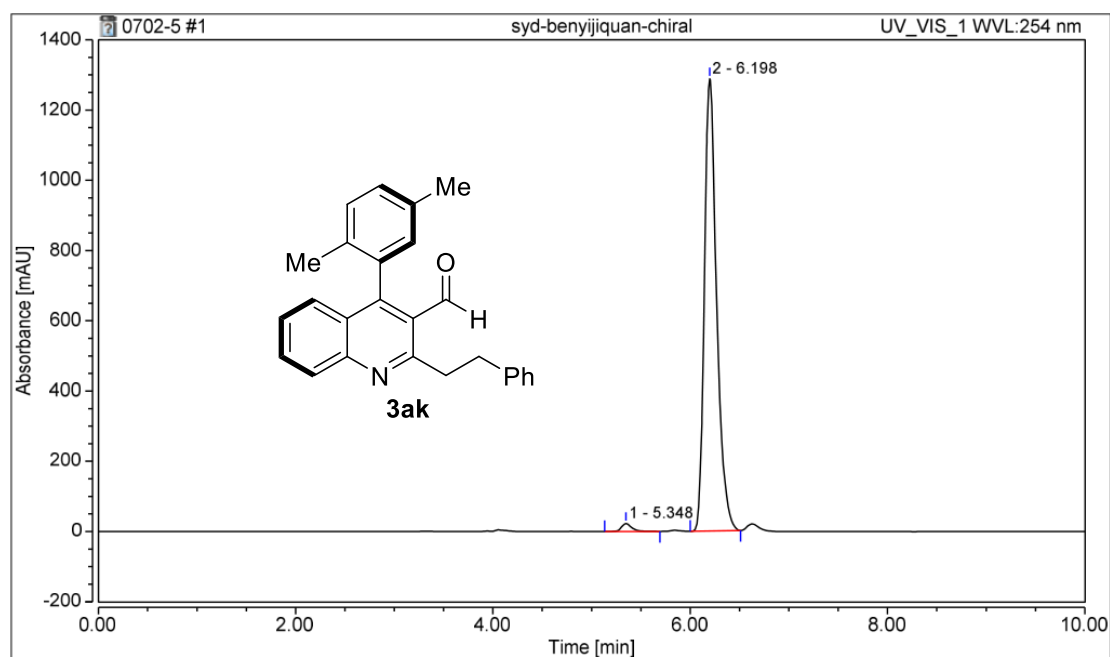

| Integration Results |                       |                 |               |                    |                |                   |
|---------------------|-----------------------|-----------------|---------------|--------------------|----------------|-------------------|
| No.                 | Retention Time<br>min | Area<br>mAU*min | Height<br>mAU | Relative Area<br>% | Asymmetry (EP) | Peak Width<br>min |
| 1                   | 5.348                 | 2.720           | 22.825        | 1.46               | 1.36           | 0.17              |
| 2                   | 6.198                 | 184.026         | 1287.826      | 98.54              | 1.33           | 0.21              |
| Total:              |                       | 186.746         | 1310.651      | 100.00             |                |                   |

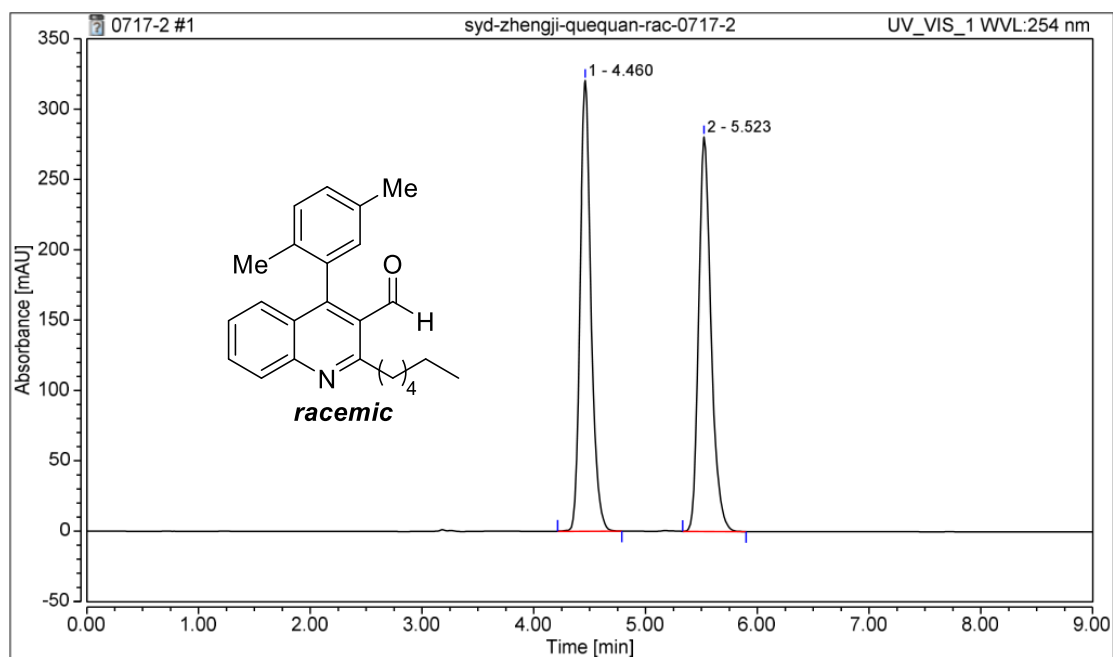

| Integration Results |                       |                 |                |                    |                |                   |
|---------------------|-----------------------|-----------------|----------------|--------------------|----------------|-------------------|
| No.                 | Retention Time<br>min | Area<br>mAU*min | Height<br>mAU  | Relative Area<br>% | Asymmetry (EP) | Peak Width<br>min |
| 1                   | 4.460                 | 36.080          | 320.437        | 49.98              | 1.22           | 0.17              |
| 2                   | 5.523                 | 36.111          | 280.464        | 50.02              | 1.29           | 0.20              |
| <b>Total:</b>       |                       | <b>72.191</b>   | <b>600.901</b> | <b>100.00</b>      |                |                   |

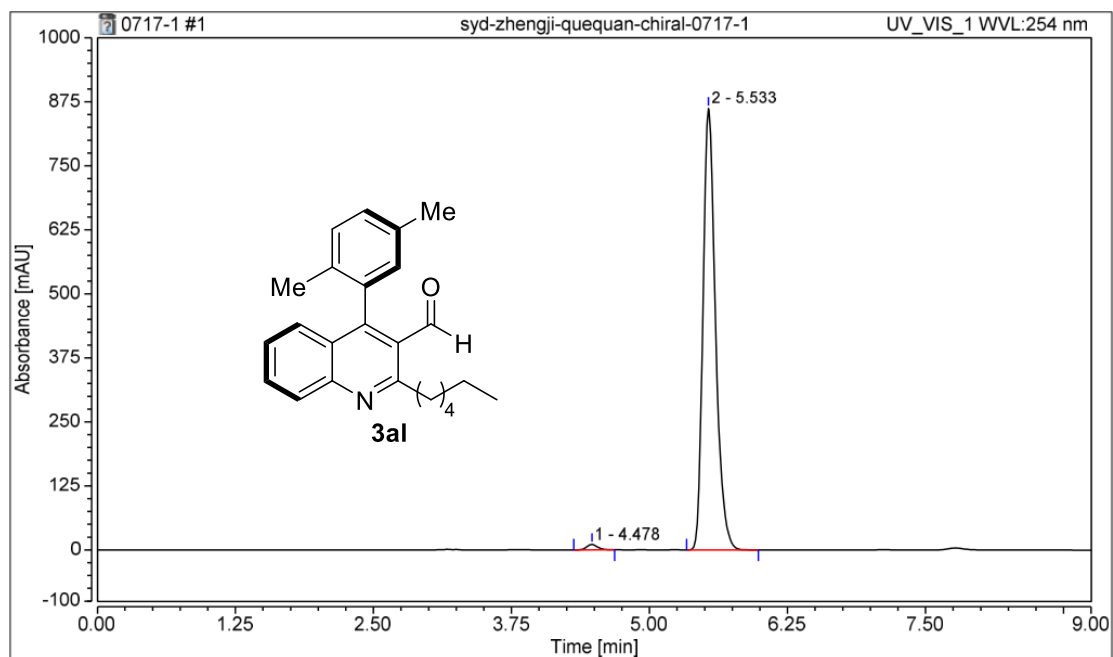

| Integration Results |                       |                 |                |                    |                |                   |
|---------------------|-----------------------|-----------------|----------------|--------------------|----------------|-------------------|
| No.                 | Retention Time<br>min | Area<br>mAU*min | Height<br>mAU  | Relative Area<br>% | Asymmetry (EP) | Peak Width<br>min |
| 1                   | 4.478                 | 1.196           | 10.542         | 1.05               | 1.15           | 0.18              |
| 2                   | 5.533                 | 112.975         | 862.036        | 98.95              | 1.31           | 0.20              |
| <b>Total:</b>       |                       | <b>114.171</b>  | <b>872.578</b> | <b>100.00</b>      |                |                   |

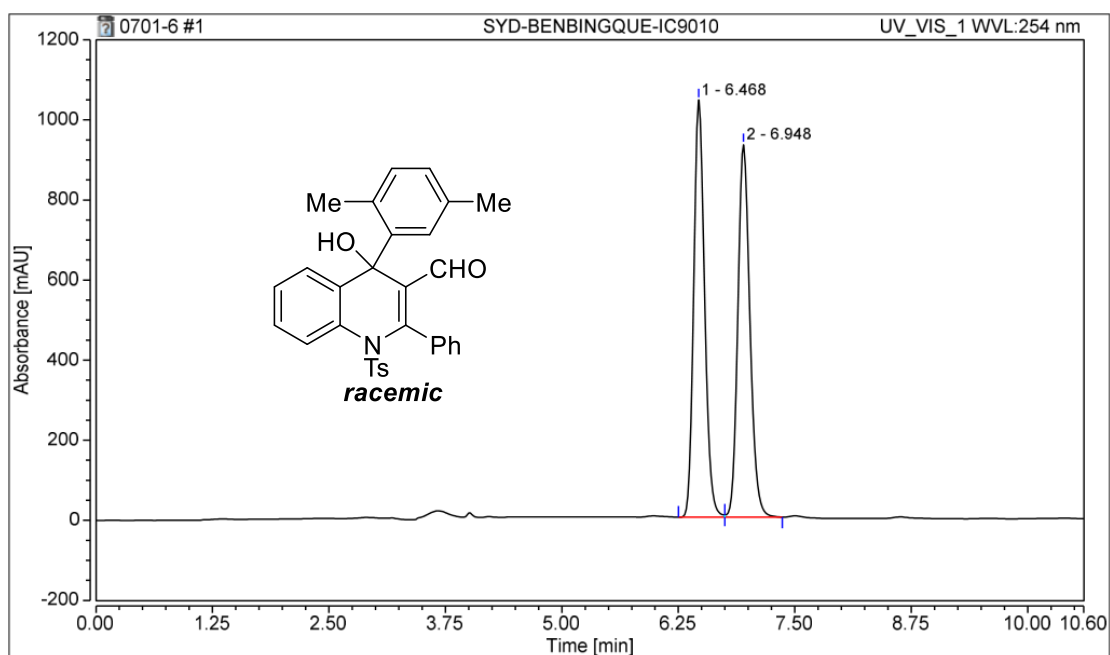

| Integration Results |                       |                 |                 |                    |                |                   |
|---------------------|-----------------------|-----------------|-----------------|--------------------|----------------|-------------------|
| No.                 | Retention Time<br>min | Area<br>mAU*min | Height<br>mAU   | Relative Area<br>% | Asymmetry (EP) | Peak Width<br>min |
| 1                   | 6.468                 | 140.961         | 1041.749        | 50.16              | 1.17           | 0.21              |
| 2                   | 6.948                 | 140.056         | 930.102         | 49.84              | 1.17           | 0.23              |
| <b>Total:</b>       |                       | <b>281.018</b>  | <b>1971.850</b> | <b>100.00</b>      |                |                   |

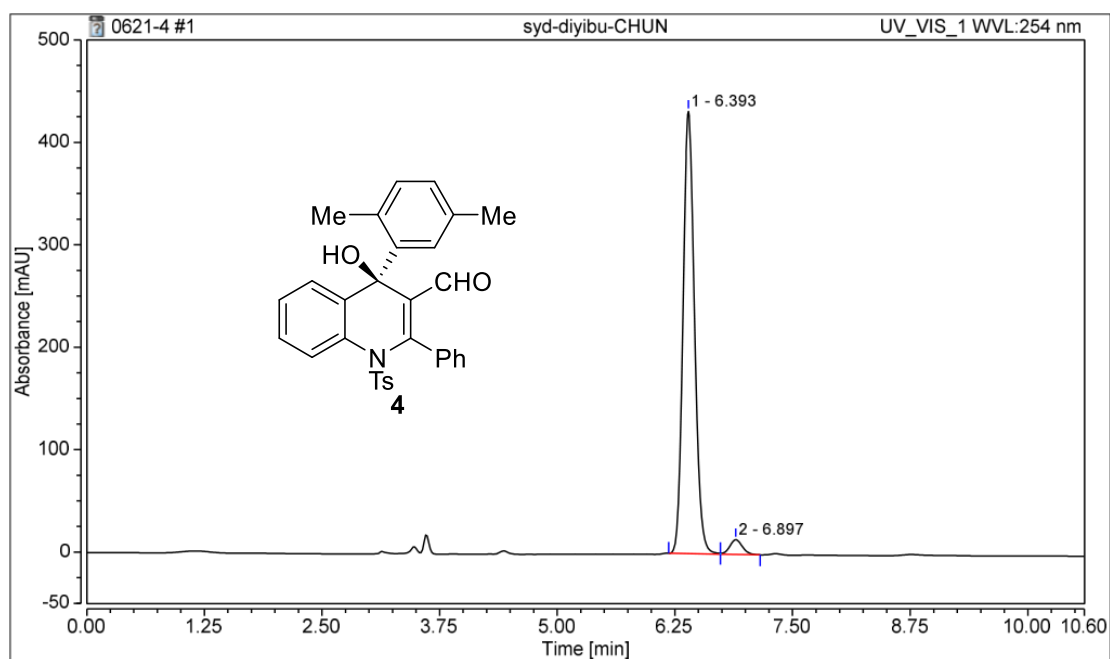

| Integration Results |                       |                 |                |                    |                |                   |
|---------------------|-----------------------|-----------------|----------------|--------------------|----------------|-------------------|
| No.                 | Retention Time<br>min | Area<br>mAU*min | Height<br>mAU  | Relative Area<br>% | Asymmetry (EP) | Peak Width<br>min |
| 1                   | 6.393                 | 61.165          | 431.835        | 96.43              | 1.13           | 0.22              |
| 2                   | 6.897                 | 2.267           | 14.448         | 3.57               | n.a.           | 0.25              |
| <b>Total:</b>       |                       | <b>63.432</b>   | <b>446.283</b> | <b>100.00</b>      |                |                   |



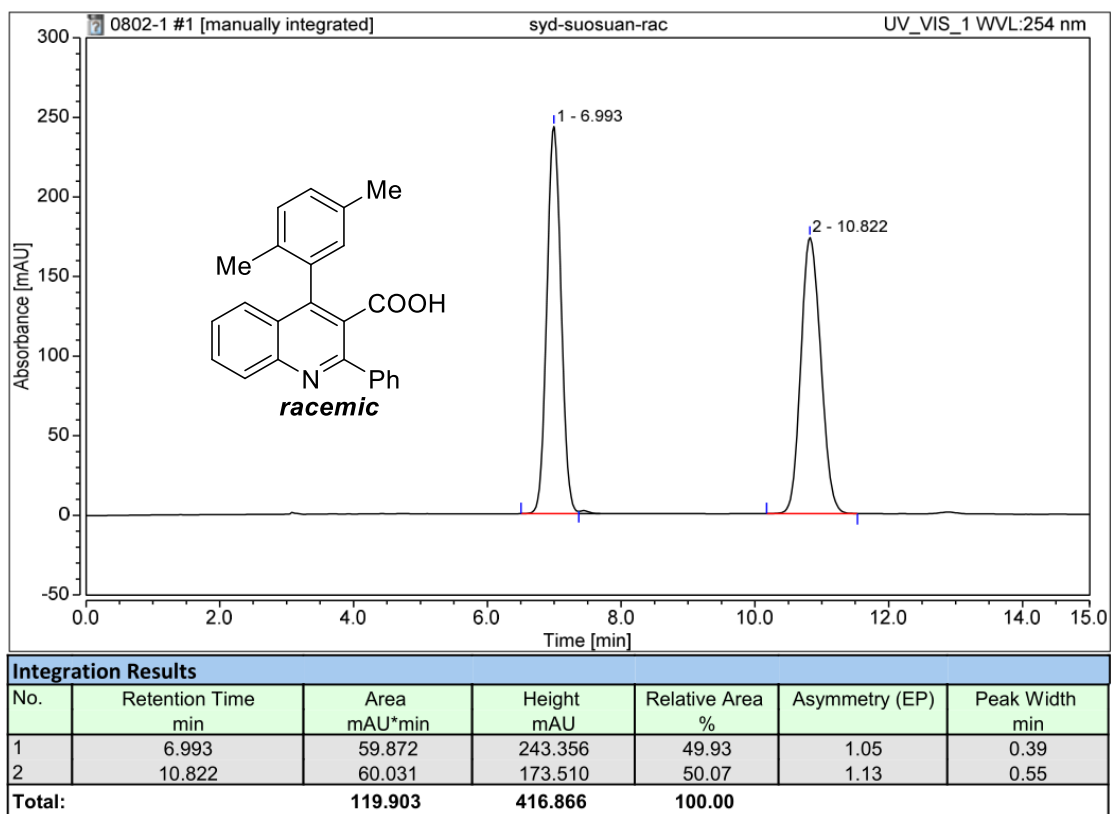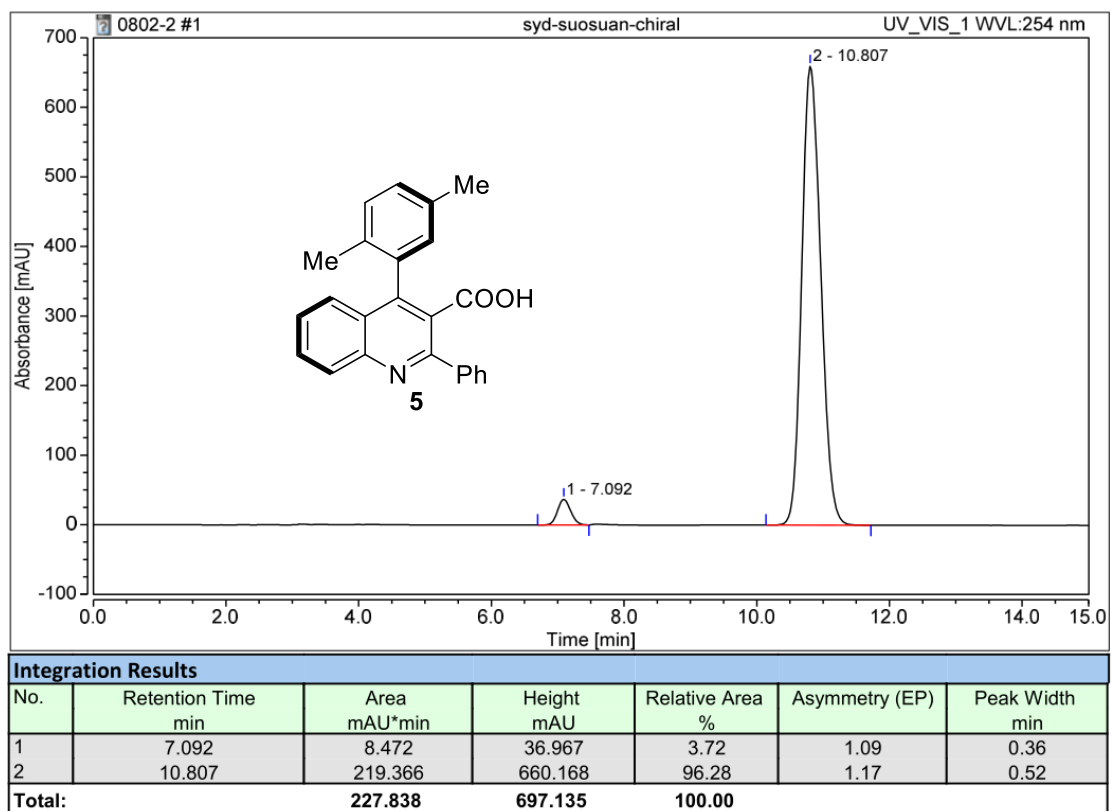

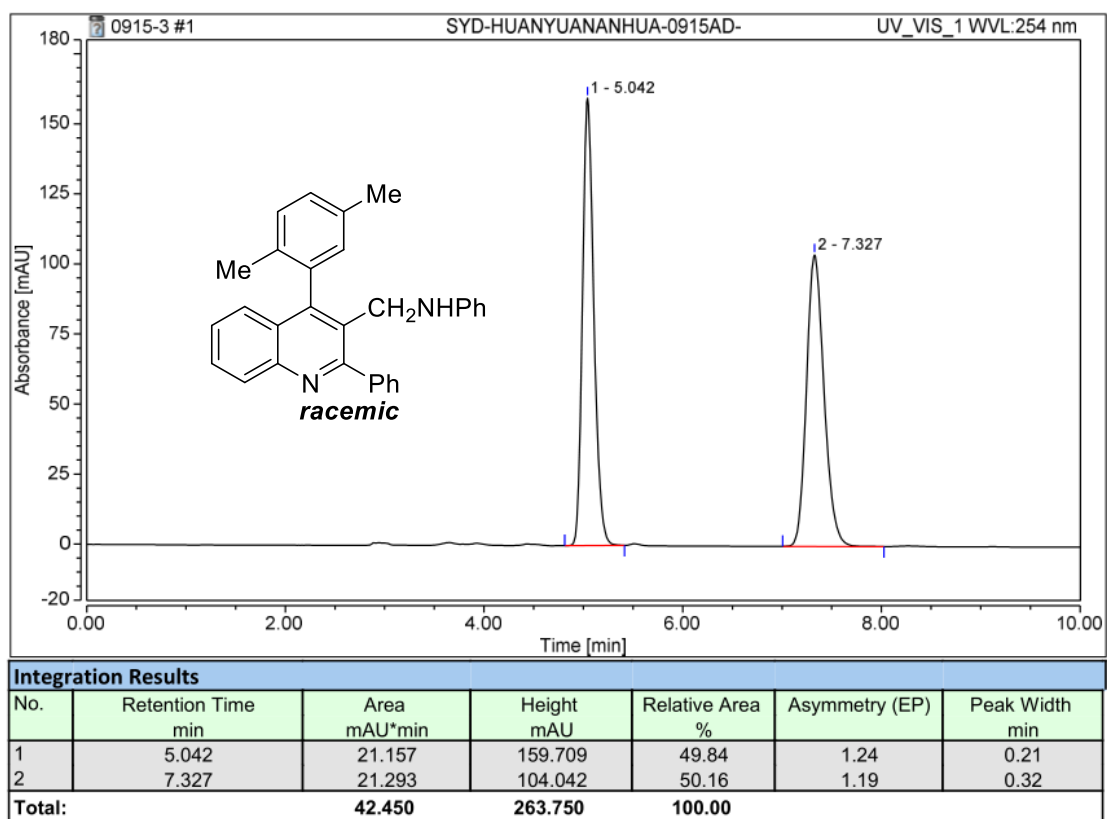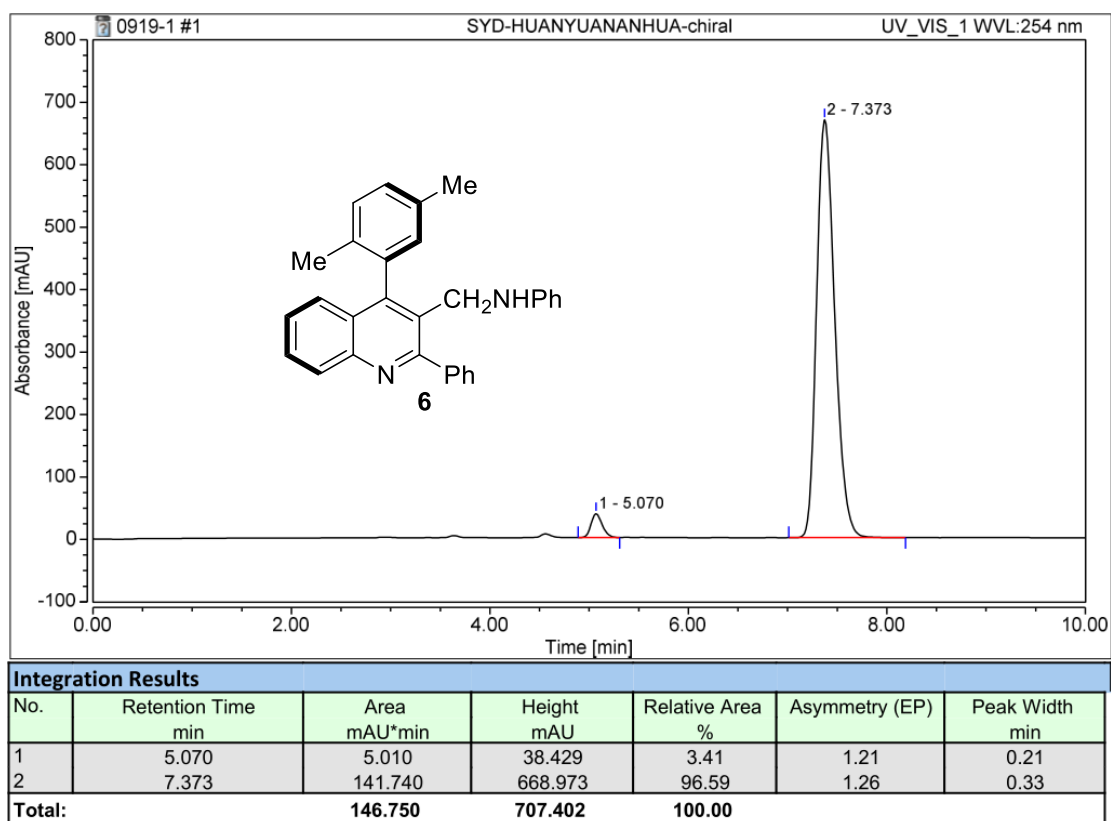

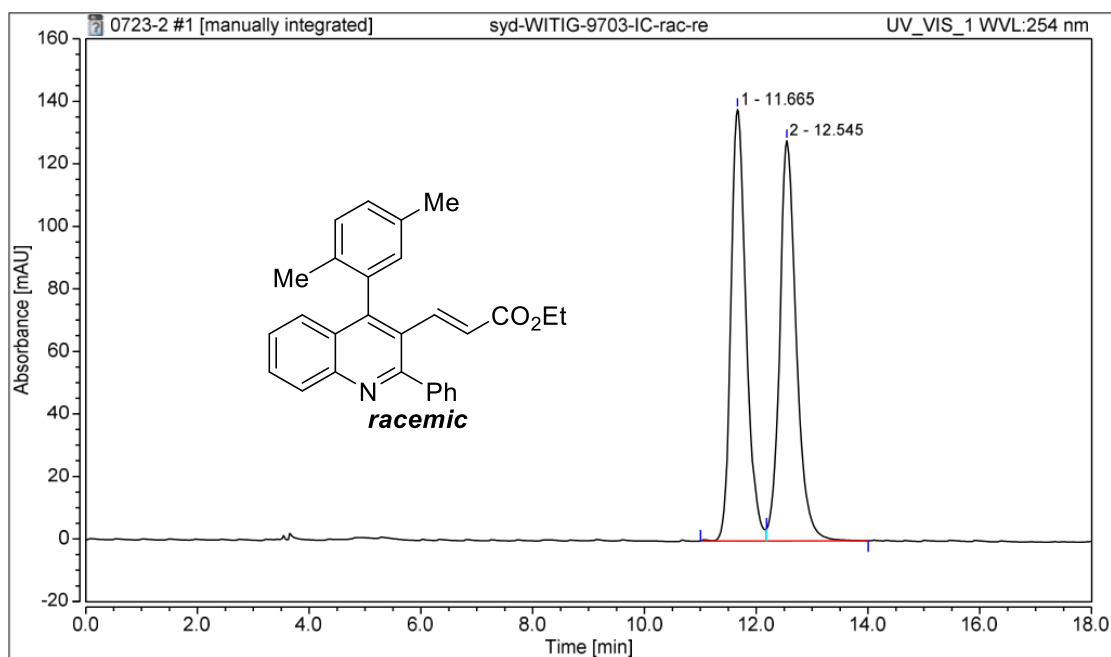

| Integration Results |                       |                 |                |                    |                |                   |
|---------------------|-----------------------|-----------------|----------------|--------------------|----------------|-------------------|
| No.                 | Retention Time<br>min | Area<br>mAU*min | Height<br>mAU  | Relative Area<br>% | Asymmetry (EP) | Peak Width<br>min |
| 1                   | 11.665                | 43.409          | 138.022        | 49.61              | 1.26           | 0.48              |
| 2                   | 12.545                | 44.089          | 128.022        | 50.39              | 1.22           | 0.51              |
| <b>Total:</b>       |                       | <b>87.498</b>   | <b>266.043</b> | <b>100.00</b>      |                |                   |

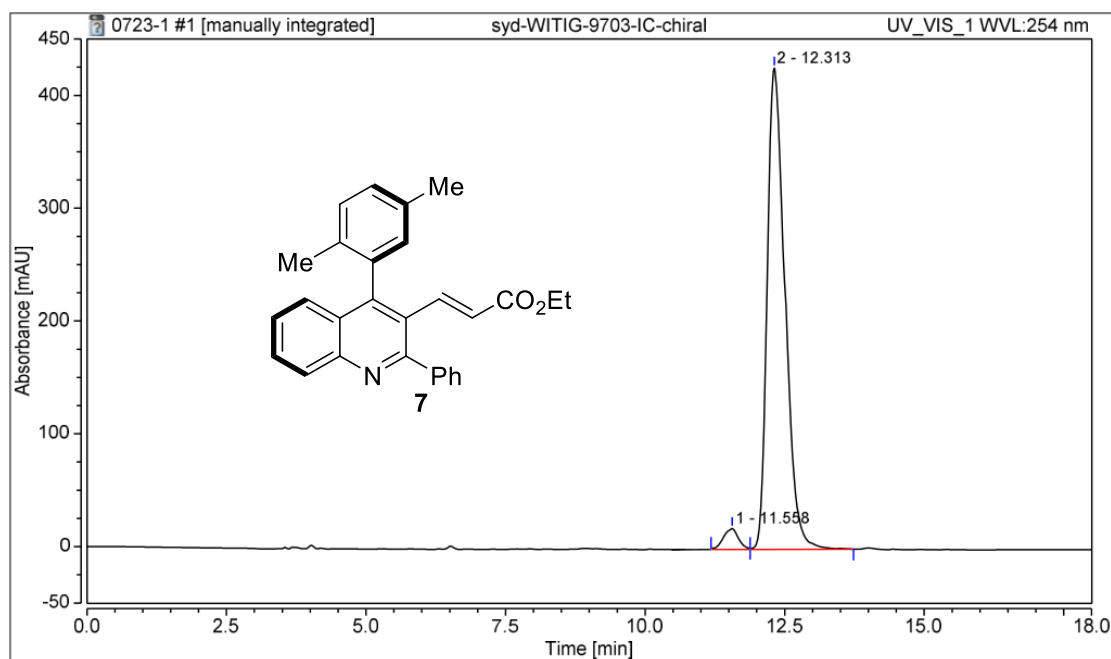

| Integration Results |                       |                 |                |                    |                |                   |
|---------------------|-----------------------|-----------------|----------------|--------------------|----------------|-------------------|
| No.                 | Retention Time<br>min | Area<br>mAU*min | Height<br>mAU  | Relative Area<br>% | Asymmetry (EP) | Peak Width<br>min |
| 1                   | 11.558                | 5.813           | 18.635         | 3.56               | n.a.           | 0.76              |
| 2                   | 12.313                | 157.358         | 426.709        | 96.44              | 1.39           | 0.60              |
| <b>Total:</b>       |                       | <b>163.171</b>  | <b>445.344</b> | <b>100.00</b>      |                |                   |

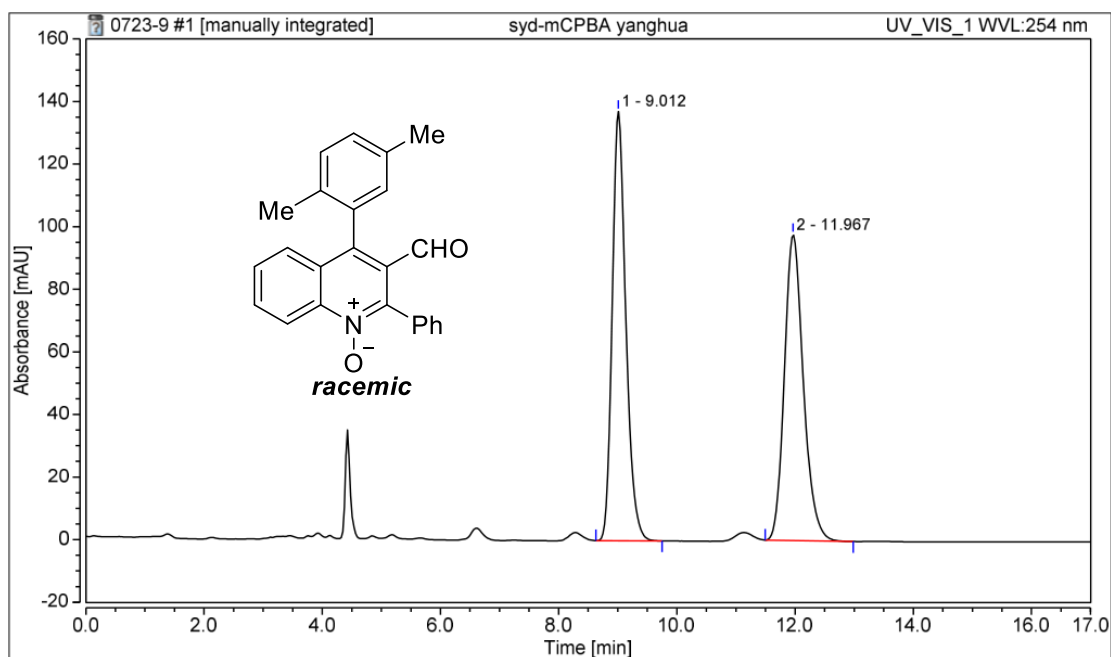

| Integration Results |                       |                 |               |                    |                |                   |
|---------------------|-----------------------|-----------------|---------------|--------------------|----------------|-------------------|
| No.                 | Retention Time<br>min | Area<br>mAU*min | Height<br>mAU | Relative Area<br>% | Asymmetry (EP) | Peak Width<br>min |
| 1                   | 9.012                 | 36.565          | 137.183       | 50.07              | 1.23           | 0.41              |
| 2                   | 11.967                | 36.468          | 97.746        | 49.93              | 1.21           | 0.58              |
| Total:              |                       | 73.033          | 234.929       | 100.00             |                |                   |

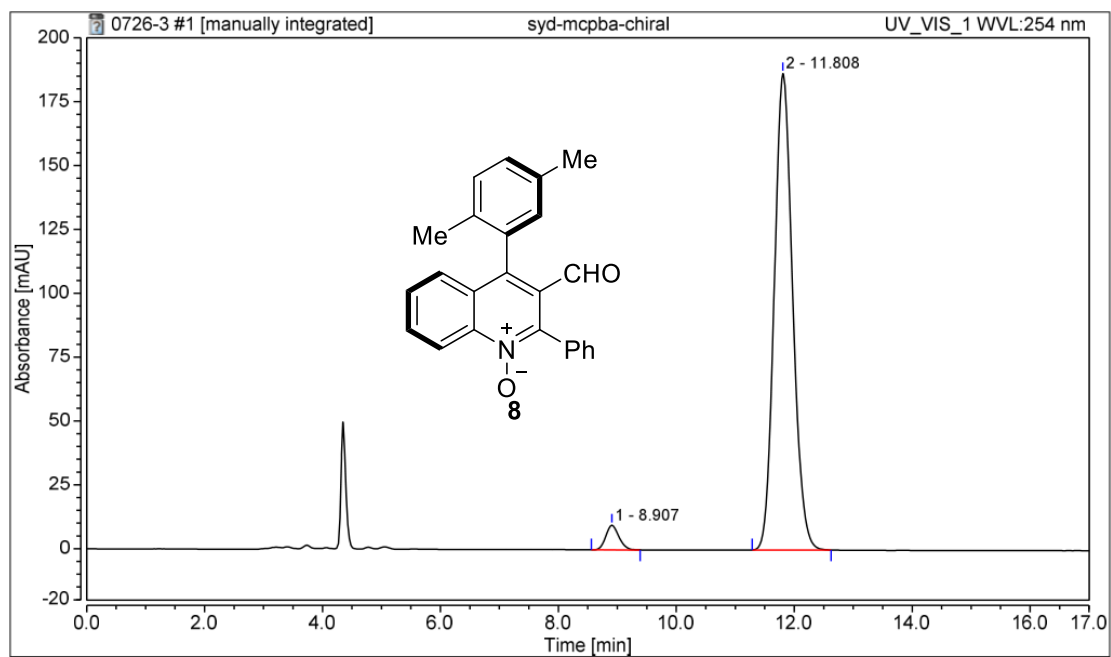

| Integration Results |                       |                 |               |                    |                |                   |
|---------------------|-----------------------|-----------------|---------------|--------------------|----------------|-------------------|
| No.                 | Retention Time<br>min | Area<br>mAU*min | Height<br>mAU | Relative Area<br>% | Asymmetry (EP) | Peak Width<br>min |
| 1                   | 8.907                 | 2.489           | 9.641         | 3.56               | 1.15           | 0.41              |
| 2                   | 11.808                | 67.338          | 186.502       | 96.44              | 1.13           | 0.57              |
| Total:              |                       | 69.827          | 196.143       | 100.00             |                |                   |

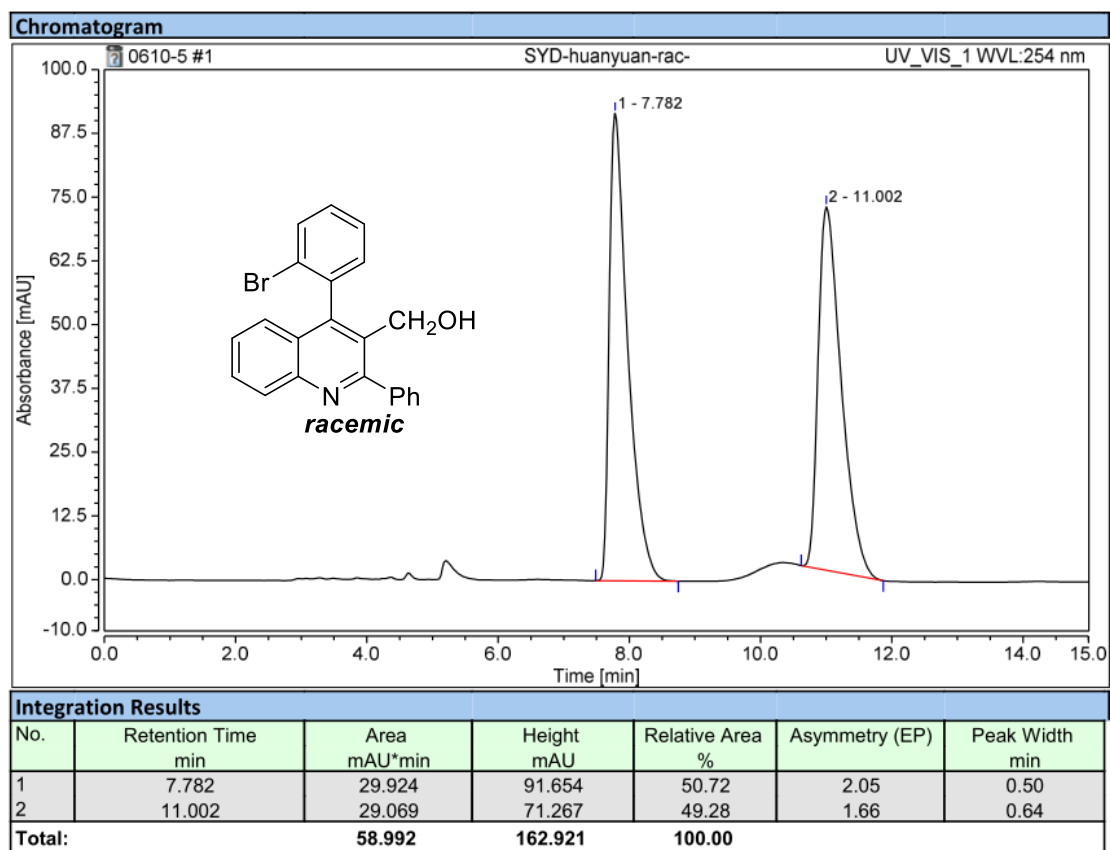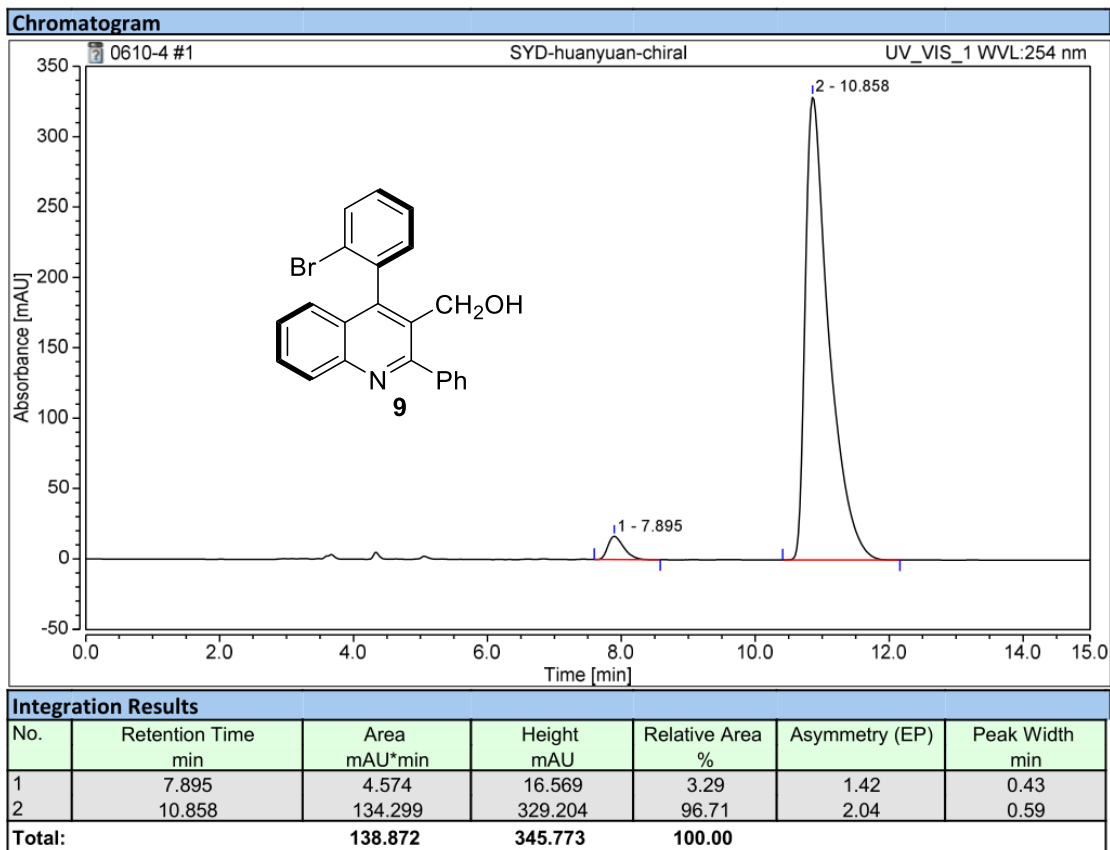

## X-ray Crystallographic Information

The absolute configuration of compound **9** was assigned to be (aS) by the single crystal X-ray analysis. The crystal data of compound **9** have been deposited in CCDC with number 2021435.

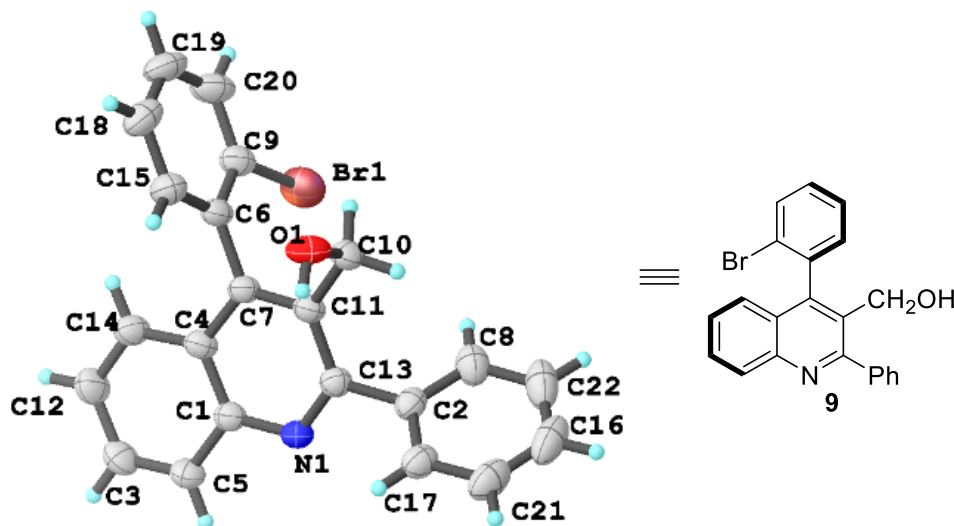

**Table S2. Crystal data and structure refinement for NDJ-HZ-300K.**

|                                                |                                        |
|------------------------------------------------|----------------------------------------|
| Identification code                            | NDJ-HZ-300K                            |
| Empirical formula                              | C <sub>22</sub> H <sub>16</sub> BrNO   |
| Formula weight                                 | 390.27                                 |
| Temperature/K                                  | 300.91(10)                             |
| Crystal system                                 | monoclinic                             |
| Space group                                    | C2                                     |
| a/Å                                            | 16.7622(2)                             |
| b/Å                                            | 7.97140(10)                            |
| c/Å                                            | 13.42690(10)                           |
| $\alpha/^\circ$                                | 90                                     |
| $\beta/^\circ$                                 | 100.2810(10)                           |
| $\gamma/^\circ$                                | 90                                     |
| Volume/Å <sup>3</sup>                          | 1765.27(3)                             |
| Z                                              | 4                                      |
| $\rho_{\text{calc}}/\text{cm}^3$               | 1.468                                  |
| $\mu/\text{mm}^{-1}$                           | 3.232                                  |
| F(000)                                         | 792.0                                  |
| Crystal size/mm <sup>3</sup>                   | ? × ? × ?                              |
| Radiation                                      | Cu K $\alpha$ ( $\lambda$ = 1.54184)   |
| 2 $\theta$ range for data collection/ $^\circ$ | 6.69 to 154.394                        |
| Index ranges                                   | -14 ≤ h ≤ 20, -9 ≤ k ≤ 9, -16 ≤ l ≤ 16 |

|                                                |                                                                  |
|------------------------------------------------|------------------------------------------------------------------|
| Reflections collected                          | 9327                                                             |
| Independent reflections                        | 3420 [ $R_{\text{int}} = 0.0231$ , $R_{\text{sigma}} = 0.0242$ ] |
| Data/restraints/parameters                     | 3420/1/228                                                       |
| Goodness-of-fit on $F^2$                       | 0.858                                                            |
| Final R indexes [ $I \geq 2\sigma(I)$ ]        | $R_1 = 0.0276$ , $wR_2 = 0.0934$                                 |
| Final R indexes [all data]                     | $R_1 = 0.0280$ , $wR_2 = 0.0946$                                 |
| Largest diff. peak/hole / $e \text{ \AA}^{-3}$ | 0.23/-0.60                                                       |
| Flack parameter                                | -0.04(2)                                                         |

**Table S3. Fractional Atomic Coordinates ( $\times 10^4$ ) and Equivalent Isotropic Displacement Parameters ( $\text{\AA}^2 \times 10^3$ ) for NDJ-HZ-300K.  $U_{\text{eq}}$  is defined as 1/3 of the trace of the orthogonalised  $U_{ij}$  tensor.**

| Atom | <i>x</i>    | <i>y</i>   | <i>z</i>    | $U(\text{eq})$ |
|------|-------------|------------|-------------|----------------|
| Br1  | 8459.8 (2)  | 2191.9 (6) | 1880.5 (3)  | 63.71 (16)     |
| O1   | 8798.2 (14) | 7822 (3)   | 3865.0 (17) | 49.7 (5)       |
| N1   | 6925.1 (13) | 4180 (3)   | 4505.9 (16) | 36.9 (5)       |
| C1   | 6455.1 (15) | 4245 (4)   | 3566.7 (19) | 37.0 (5)       |
| C2   | 8194.1 (16) | 4438 (4)   | 5636.7 (19) | 38.9 (6)       |
| C3   | 5130.6 (16) | 3835 (5)   | 2543 (2)    | 49.1 (7)       |
| C4   | 6763.1 (16) | 4700 (4)   | 2688 (2)    | 37.3 (5)       |
| C5   | 5618.4 (16) | 3829 (4)   | 3473 (2)    | 43.2 (6)       |
| C6   | 7955.9 (14) | 5613 (4)   | 1914.7 (18) | 37.8 (5)       |
| C7   | 7598.4 (14) | 5166 (3)   | 2820.4 (18) | 35.6 (5)       |
| C8   | 8892.2 (19) | 3444 (5)   | 5783 (3)    | 54.7 (7)       |
| C9   | 8352.7 (16) | 4442 (4)   | 1415 (2)    | 43.5 (6)       |
| C10  | 8883.0 (15) | 6050 (4)   | 3948 (2)    | 41.1 (6)       |
| C11  | 8054.3 (14) | 5218 (3)   | 3776.7 (18) | 35.5 (5)       |
| C12  | 5435.9 (18) | 4278 (5)   | 1673 (2)    | 51.7 (7)       |
| C13  | 7698.6 (16) | 4627 (3)   | 4601.9 (19) | 36.1 (5)       |
| C14  | 6241.5 (18) | 4696 (4)   | 1743 (2)    | 44.2 (6)       |
| C15  | 7900.0 (17) | 7259 (6)   | 1534 (2)    | 48.3 (6)       |
| C16  | 9357 (2)    | 3302 (6)   | 6745 (3)    | 69.2 (11)      |
| C17  | 7969.0 (18) | 5245 (4)   | 6454 (2)    | 47.6 (6)       |
| C18  | 8230 (2)    | 7675 (5)   | 695 (2)     | 56.3 (8)       |
| C19  | 8633 (2)    | 6499 (5)   | 224 (2)     | 58.8 (8)       |
| C20  | 8698 (2)    | 4867 (6)   | 580 (2)     | 57.4 (8)       |
| C21  | 8448 (3)    | 5104 (6)   | 7412 (2)    | 63.8 (10)      |
| C22  | 9145 (3)    | 4142 (6)   | 7541 (3)    | 72.4 (12)      |

**Table S4. Anisotropic Displacement Parameters ( $\text{\AA}^2 \times 10^3$ ) for NDJ-HZ-300K. The Anisotropic displacement factor exponent takes the form:  $-2\pi^2[h^2a^{*2}U_{11}+2hka^*b^*U_{12}+\dots]$ .**

| Atom | U <sub>11</sub> | U <sub>22</sub> | U <sub>33</sub> | U <sub>23</sub> | U <sub>13</sub> | U <sub>12</sub> |
|------|-----------------|-----------------|-----------------|-----------------|-----------------|-----------------|
| Br1  | 66.4 (2)        | 51.7 (2)        | 77.0 (3)        | -4.24 (16)      | 23.50 (16)      | 6.76 (15)       |
| O1   | 51.8 (11)       | 52.9 (12)       | 50.5 (11)       | -10.0 (9)       | 26.0 (9)        | -16.3 (9)       |
| N1   | 33.8 (9)        | 42.5 (12)       | 36.3 (10)       | 3.0 (9)         | 11.5 (8)        | -1.2 (9)        |
| C1   | 34.7 (11)       | 41.1 (13)       | 36.5 (11)       | -0.8 (9)        | 9.6 (9)         | -0.7 (10)       |
| C2   | 40.5 (12)       | 41.0 (15)       | 34.3 (11)       | 4.7 (10)        | 4.3 (9)         | -5.8 (10)       |
| C3   | 32.2 (11)       | 59.6 (18)       | 54.8 (15)       | -0.5 (13)       | 5.7 (11)        | -5.7 (11)       |
| C4   | 32.0 (11)       | 44.2 (14)       | 37.1 (11)       | -5.1 (10)       | 9.8 (9)         | -2.9 (10)       |
| C5   | 34.8 (11)       | 52.4 (16)       | 44.2 (13)       | 3.4 (11)        | 11.9 (10)       | -4.1 (11)       |
| C6   | 29.8 (10)       | 51.1 (14)       | 33.5 (10)       | -3.1 (10)       | 8.6 (8)         | -3.7 (10)       |
| C7   | 33.9 (10)       | 41.1 (13)       | 33.9 (10)       | -1.9 (9)        | 11.3 (8)        | -1.4 (9)        |
| C8   | 49.4 (15)       | 53.5 (17)       | 58.3 (17)       | 7.3 (13)        | 1.6 (13)        | 4.4 (13)        |
| C9   | 38.7 (11)       | 53.5 (16)       | 39.8 (12)       | -6.2 (11)       | 11.0 (10)       | -3.1 (10)       |
| C10  | 32.3 (11)       | 52.8 (15)       | 39.2 (12)       | -0.5 (11)       | 8.8 (9)         | -4.0 (11)       |
| C11  | 30.7 (10)       | 41.3 (13)       | 35.8 (11)       | -2.3 (9)        | 9.7 (8)         | -1.7 (9)        |
| C12  | 37.9 (12)       | 72 (2)          | 43.1 (14)       | -7.9 (14)       | 0.4 (11)        | -4.3 (13)       |
| C13  | 36.0 (11)       | 39.0 (13)       | 33.9 (11)       | -2.2 (9)        | 7.9 (9)         | -2.4 (9)        |
| C14  | 40.6 (12)       | 58.2 (18)       | 35.1 (12)       | -4.6 (11)       | 10.1 (9)        | -5.3 (12)       |
| C15  | 51.0 (12)       | 54.4 (15)       | 42.1 (12)       | 3.2 (14)        | 15.1 (9)        | 1.6 (15)        |
| C16  | 55.0 (17)       | 63 (2)          | 81 (3)          | 23.3 (19)       | -11.6 (18)      | 0.9 (15)        |
| C17  | 49.4 (14)       | 56.2 (17)       | 36.9 (12)       | -0.6 (11)       | 7.2 (11)        | -9.3 (12)       |
| C18  | 66.6 (18)       | 64 (2)          | 38.6 (13)       | 7.3 (12)        | 9.4 (13)        | -13.9 (14)      |
| C19  | 62.5 (17)       | 83 (2)          | 35.2 (12)       | -1.5 (14)       | 19.1 (11)       | -18.0 (17)      |
| C20  | 52.3 (15)       | 78 (2)          | 47.4 (14)       | -13.3 (15)      | 23.7 (12)       | -6.5 (15)       |
| C21  | 76 (2)          | 77 (3)          | 36.6 (14)       | -1.2 (15)       | 2.5 (14)        | -22.7 (19)      |
| C22  | 79 (2)          | 82 (3)          | 47.4 (17)       | 18.7 (18)       | -14.2 (16)      | -25 (2)         |

**Table S5. Bond Lengths for NDJ-HZ-300K.**

| Atom Atom | Length/ $\text{\AA}$ | Atom Atom | Length/ $\text{\AA}$ |
|-----------|----------------------|-----------|----------------------|
| Br1 C9    | 1.898 (3)            | C6 C9     | 1.387 (4)            |
| O1 C10    | 1.422 (4)            | C6 C15    | 1.405 (5)            |
| N1 C1     | 1.363 (3)            | C7 C11    | 1.373 (3)            |
| N1 C13    | 1.329 (3)            | C8 C16    | 1.389 (5)            |
| C1 C4     | 1.417 (4)            | C9 C20    | 1.392 (4)            |
| C1 C5     | 1.425 (4)            | C10 C11   | 1.519 (3)            |
| C2 C8     | 1.398 (4)            | C11 C13   | 1.429 (3)            |
| C2 C13    | 1.494 (3)            | C12 C14   | 1.378 (4)            |



|    |     |           |     |     |           |
|----|-----|-----------|-----|-----|-----------|
| C2 | C17 | 1.381 (4) | C15 | C18 | 1.381 (4) |
| C3 | C5  | 1.365 (4) | C16 | C22 | 1.361 (7) |
| C3 | C12 | 1.401 (5) | C17 | C21 | 1.393 (4) |
| C4 | C7  | 1.429 (3) | C18 | C19 | 1.374 (6) |
| C4 | C14 | 1.407 (4) | C19 | C20 | 1.384 (6) |
| C6 | C7  | 1.492 (3) | C21 | C22 | 1.382 (7) |

**Table S6. Bond Angles for NDJ-HZ-300K.**

| Atom | Atom | Atom | Angle/°   | Atom | Atom | Atom | Angle/°   |
|------|------|------|-----------|------|------|------|-----------|
| C13  | N1   | C1   | 118.2 (2) | C6   | C9   | C20  | 122.0 (3) |
| N1   | C1   | C4   | 122.9 (2) | C20  | C9   | Br1  | 117.8 (3) |
| N1   | C1   | C5   | 118.0 (2) | O1   | C10  | C11  | 110.2 (2) |
| C4   | C1   | C5   | 119.0 (2) | C7   | C11  | C10  | 119.8 (2) |
| C8   | C2   | C13  | 120.1 (3) | C7   | C11  | C13  | 118.4 (2) |
| C17  | C2   | C8   | 119.5 (3) | C13  | C11  | C10  | 121.6 (2) |
| C17  | C2   | C13  | 120.4 (3) | C14  | C12  | C3   | 120.3 (3) |
| C5   | C3   | C12  | 121.0 (2) | N1   | C13  | C2   | 115.7 (2) |
| C1   | C4   | C7   | 117.2 (2) | N1   | C13  | C11  | 123.3 (2) |
| C14  | C4   | C1   | 119.4 (2) | C11  | C13  | C2   | 121.0 (2) |
| C14  | C4   | C7   | 123.4 (2) | C12  | C14  | C4   | 120.3 (3) |
| C3   | C5   | C1   | 120.0 (3) | C18  | C15  | C6   | 120.8 (3) |
| C9   | C6   | C7   | 122.0 (3) | C22  | C16  | C8   | 120.5 (4) |
| C9   | C6   | C15  | 117.3 (2) | C2   | C17  | C21  | 120.1 (3) |
| C15  | C6   | C7   | 120.6 (2) | C19  | C18  | C15  | 120.8 (4) |
| C4   | C7   | C6   | 119.2 (2) | C18  | C19  | C20  | 119.8 (3) |
| C11  | C7   | C4   | 119.6 (2) | C19  | C20  | C9   | 119.3 (3) |
| C11  | C7   | C6   | 121.2 (2) | C22  | C21  | C17  | 119.7 (4) |
| C16  | C8   | C2   | 119.6 (3) | C16  | C22  | C21  | 120.6 (3) |
| C6   | C9   | Br1  | 120.2 (2) |      |      |      |           |

**Table S7. Torsion Angles for NDJ-HZ-300K.**

| A   | B   | C   | D   | Angle/°    | A  | B   | C   | D   | Angle/°   |
|-----|-----|-----|-----|------------|----|-----|-----|-----|-----------|
| Br1 | C9  | C20 | C19 | -179.8 (2) | C7 | C11 | C13 | N1  | -6.7 (4)  |
| O1  | C10 | C11 | C7  | 72.4 (3)   | C7 | C11 | C13 | C2  | 171.8 (2) |
| O1  | C10 | C11 | C13 | -101.4 (3) | C8 | C2  | C13 | N1  | 122.8 (3) |
| N1  | C1  | C4  | C7  | -2.5 (4)   | C8 | C2  | C13 | C11 | -55.8 (4) |
| N1  | C1  | C4  | C14 | 178.4 (3)  | C8 | C2  | C17 | C21 | 1.7 (5)   |

|              |            |              |             |
|--------------|------------|--------------|-------------|
| N1 C1 C5 C3  | -178.2 (3) | C8 C16C22C21 | 2.3 (7)     |
| C1 N1 C13C2  | -176.7 (3) | C9 C6 C7 C4  | -93.9 (3)   |
| C1 N1 C13C11 | 1.9 (4)    | C9 C6 C7 C11 | 87.1 (3)    |
| C1 C4 C7 C6  | 178.5 (3)  | C9 C6 C15C18 | 0.0 (4)     |
| C1 C4 C7 C11 | -2.4 (4)   | C10C11C13N1  | 167.2 (3)   |
| C1 C4 C14C12 | 0.9 (5)    | C10C11C13C2  | -14.3 (4)   |
| C2 C8 C16C22 | -1.0 (6)   | C12C3 C5 C1  | -1.3 (5)    |
| C2 C17C21C22 | -0.5 (5)   | C13N1 C1 C4  | 2.7 (4)     |
| C3 C12C14C4  | -0.7 (6)   | C13N1 C1 C5  | -177.5 (3)  |
| C4 C1 C5 C3  | 1.5 (5)    | C13C2 C8 C16 | 178.8 (3)   |
| C4 C7 C11C10 | -167.3 (3) | C13C2 C17C21 | -178.0 (3)  |
| C4 C7 C11C13 | 6.7 (4)    | C14C4 C7 C6  | -2.4 (4)    |
| C5 C1 C4 C7  | 177.8 (3)  | C14C4 C7 C11 | 176.6 (3)   |
| C5 C1 C4 C14 | -1.3 (4)   | C15C6 C7 C4  | 86.1 (3)    |
| C5 C3 C12C14 | 0.9 (6)    | C15C6 C7 C11 | -93.0 (3)   |
| C6 C7 C11C10 | 11.7 (4)   | C15C6 C9 Br1 | 179.78 (19) |
| C6 C7 C11C13 | -174.3 (3) | C15C6 C9 C20 | 1.2 (4)     |
| C6 C9 C20C19 | -1.1 (5)   | C15C18C19C20 | 1.3 (5)     |
| C6 C15C18C19 | -1.2 (5)   | C17C2 C8 C16 | -1.0 (5)    |
| C7 C4 C14C12 | -178.1 (3) | C17C2 C13N1  | -57.5 (4)   |
| C7 C6 C9 Br1 | -0.3 (3)   | C17C2 C13C11 | 123.9 (3)   |
| C7 C6 C9 C20 | -178.9 (3) | C17C21C22C16 | -1.6 (6)    |
| C7 C6 C15C18 | -179.9 (2) | C18C19C20C9  | -0.1 (5)    |

**Table S8. Hydrogen Atom Coordinates ( $\text{\AA}\times 10^4$ ) and Isotropic Displacement Parameters ( $\text{\AA}^2\times 10^3$ ) for NDJ-HZ-300K.**

| Atom | x       | y       | z       | U(eq) |
|------|---------|---------|---------|-------|
| H1   | 8498.27 | 8151.35 | 4244.21 | 74    |
| H3   | 4587.52 | 3540.12 | 2485.17 | 59    |
| H5   | 5404.6  | 3553.85 | 4044.93 | 52    |
| H8   | 9044.54 | 2881.43 | 5240.15 | 66    |
| H10A | 9176.68 | 5760.59 | 4615.26 | 49    |
| H10B | 9191.49 | 5643.88 | 3450.82 | 49    |
| H12  | 5093.46 | 4289.24 | 1046.89 | 62    |
| H14  | 6441.42 | 4977.78 | 1161.37 | 53    |
| H15  | 7638.18 | 8076.97 | 1849.95 | 58    |
| H16  | 9816.98 | 2627.05 | 6846.42 | 83    |
| H17  | 7497.46 | 5884.26 | 6364.62 | 57    |
| H18  | 8177.77 | 8765.66 | 444.79  | 68    |
| H19  | 8861.9  | 6799.02 | -332.25 | 71    |

|     |         |         |         |    |
|-----|---------|---------|---------|----|
| H20 | 8968.92 | 4062.31 | 265.55  | 69 |
| H21 | 8298.59 | 5653.61 | 7961.38 | 77 |
| H22 | 9471.25 | 4069.18 | 8176.29 | 87 |
